# Supplementary material
Source: PubMed Central journal article supplement (PMC4967356)

May-1989

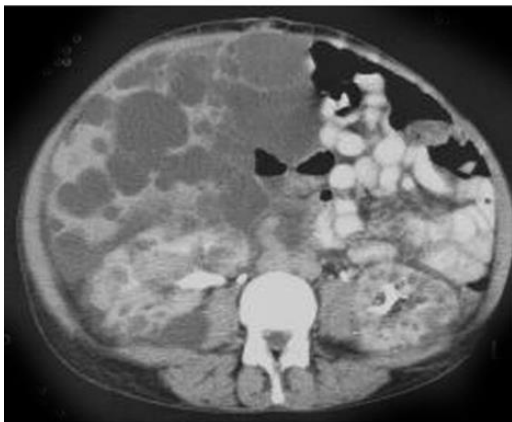

October-1989

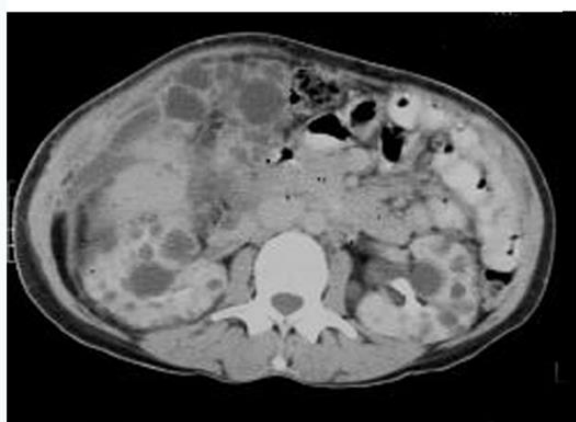

November-1995

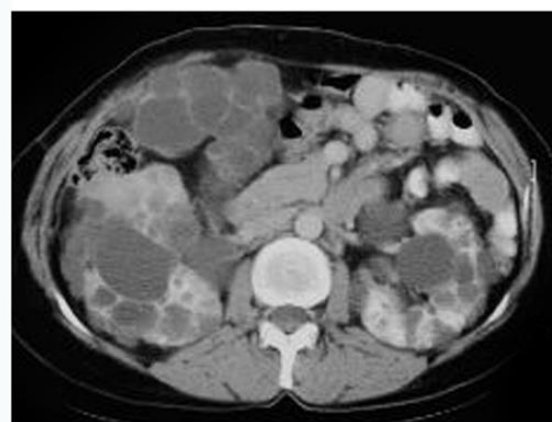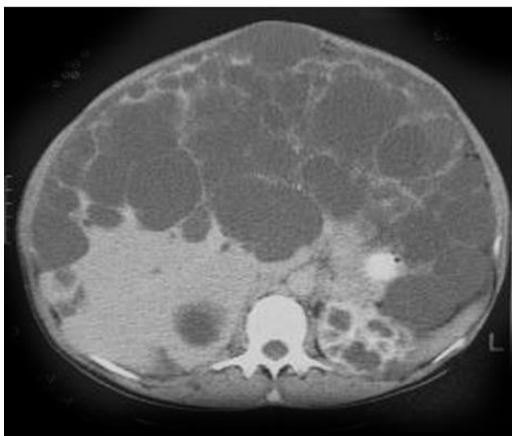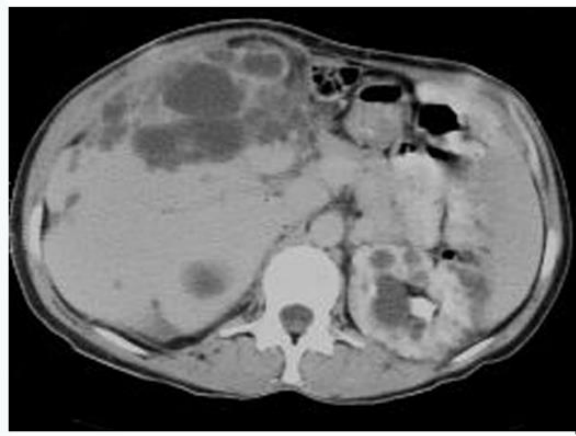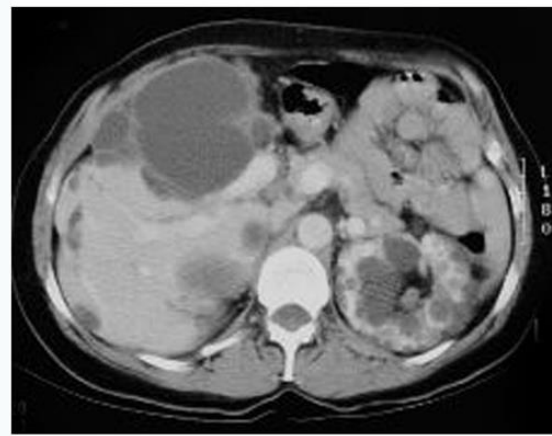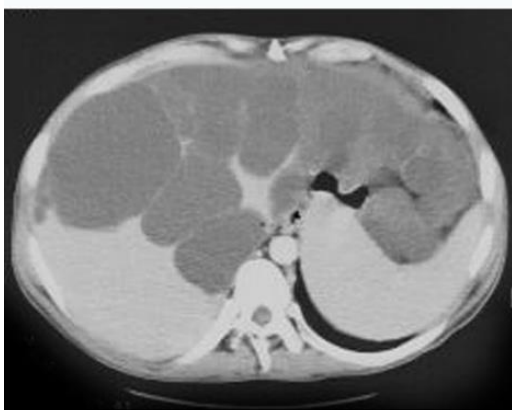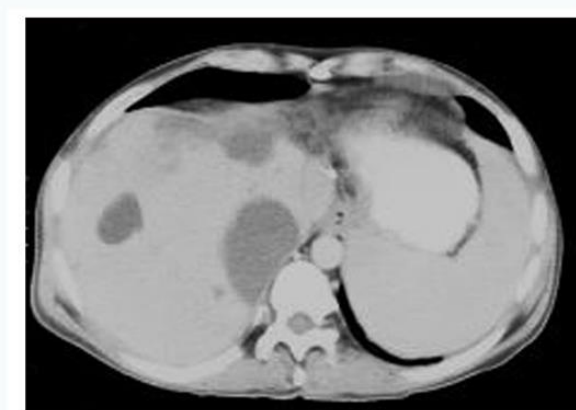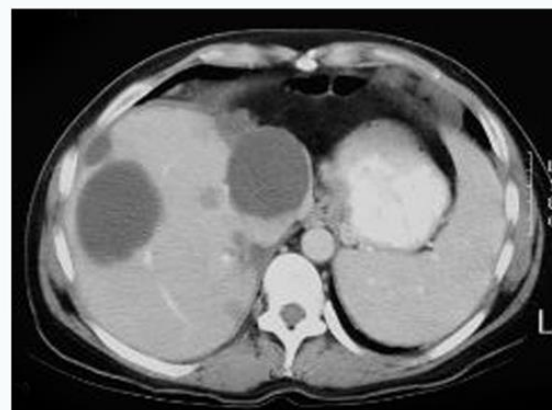

July-1989

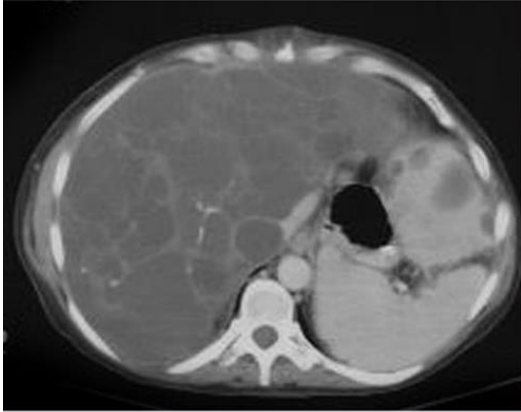

February-1990

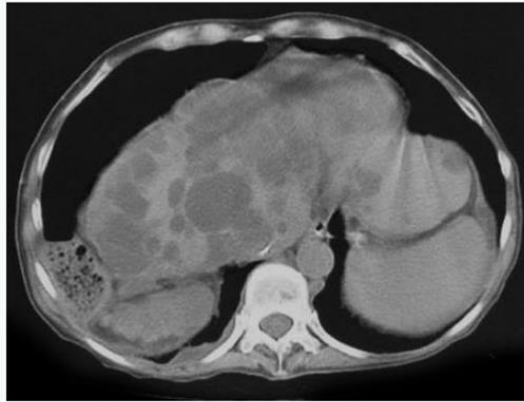

November-2002

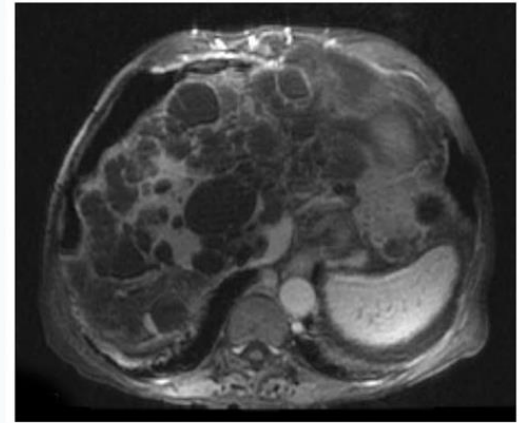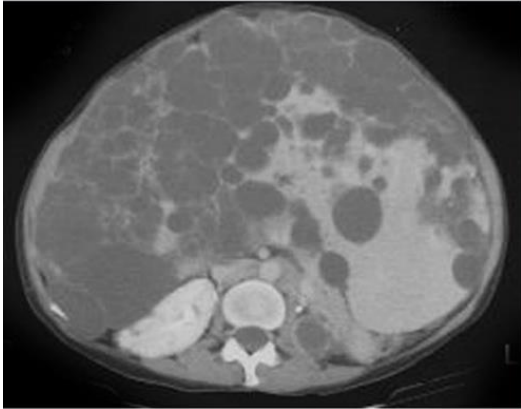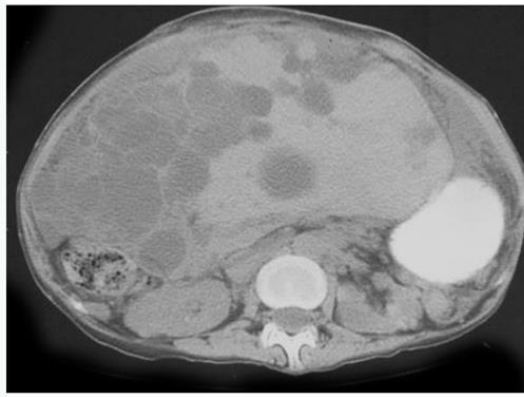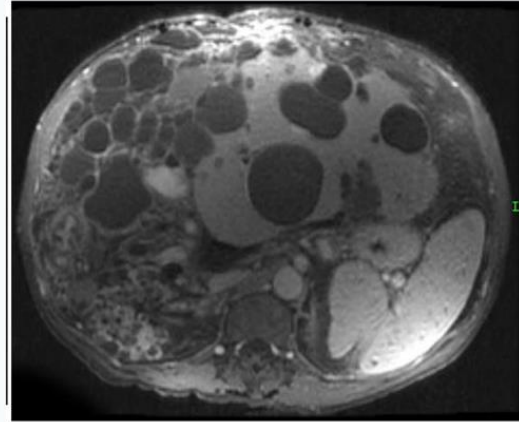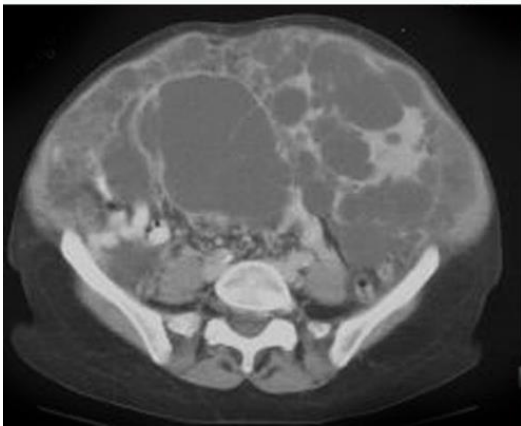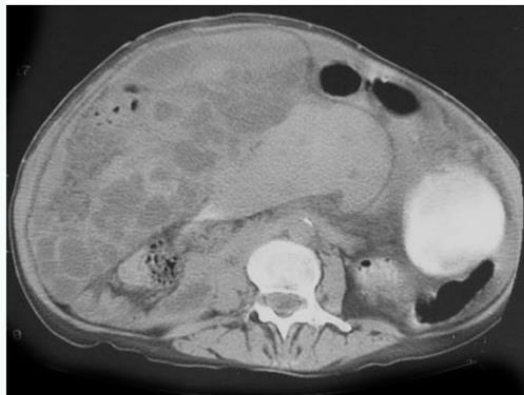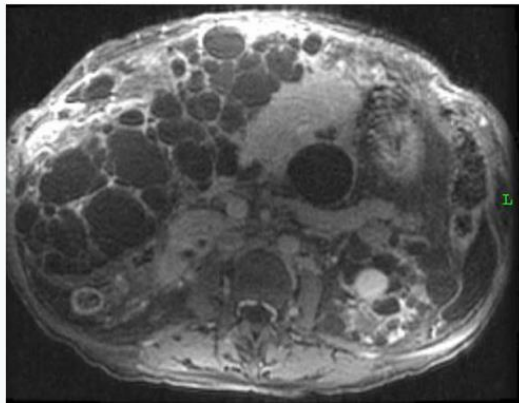

March-2007

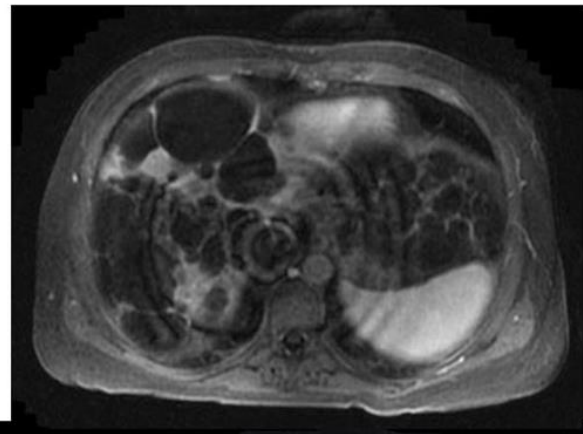

July-2007

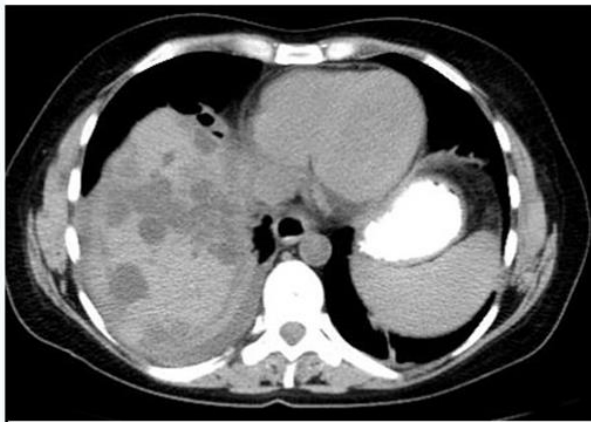

July-2013

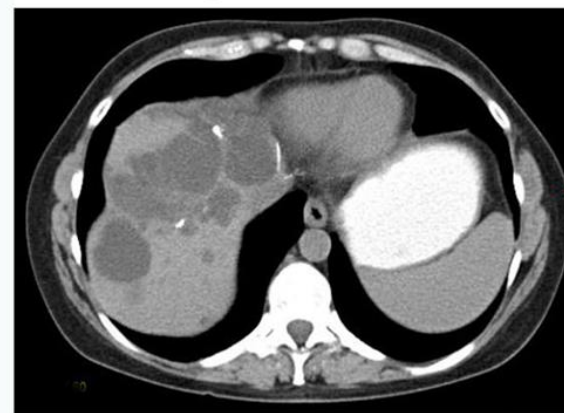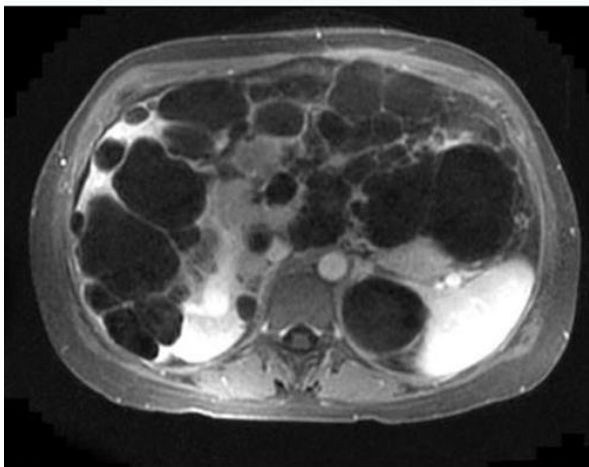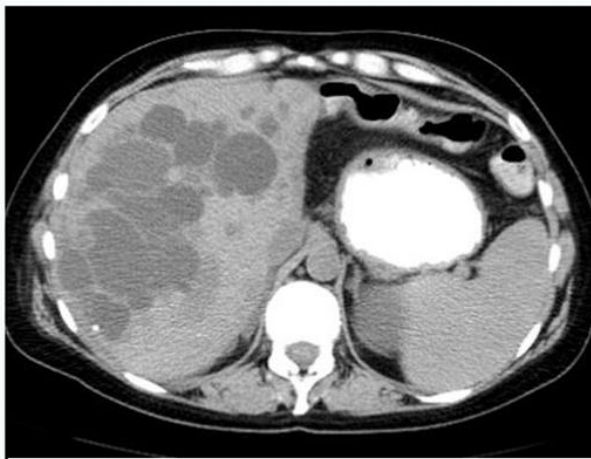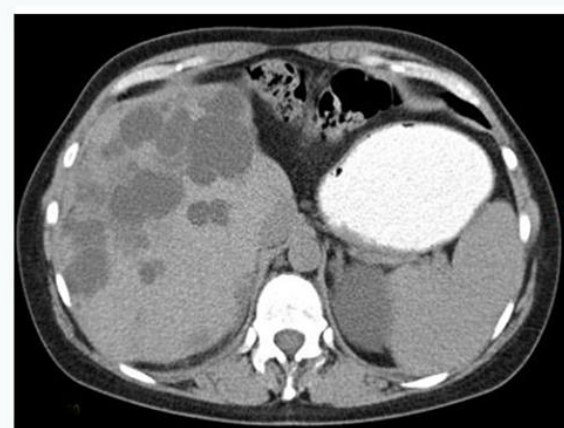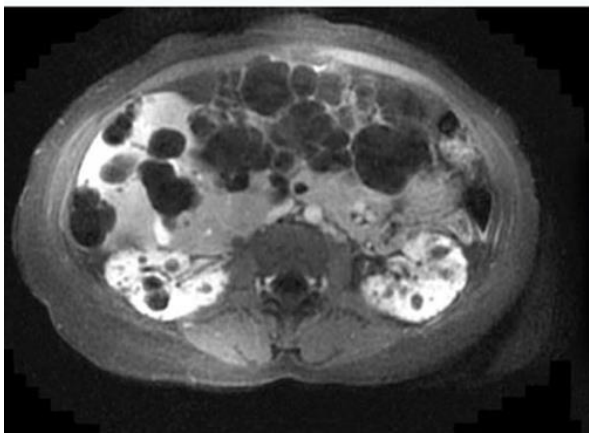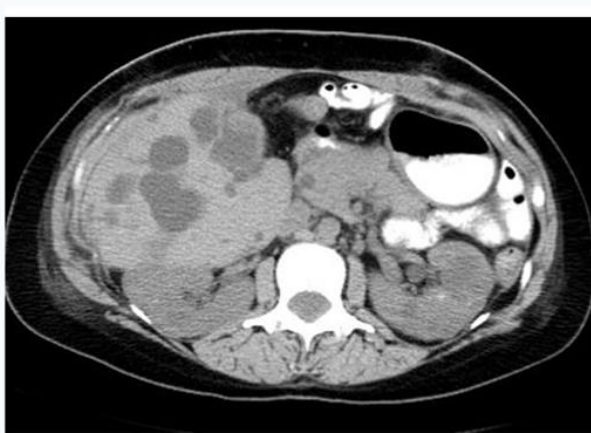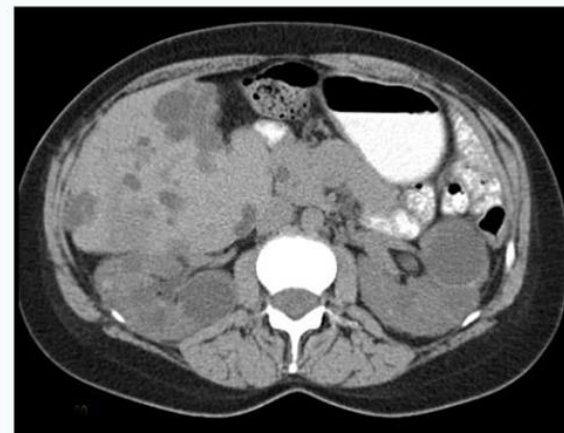

October-1999

March-2000

October-2014

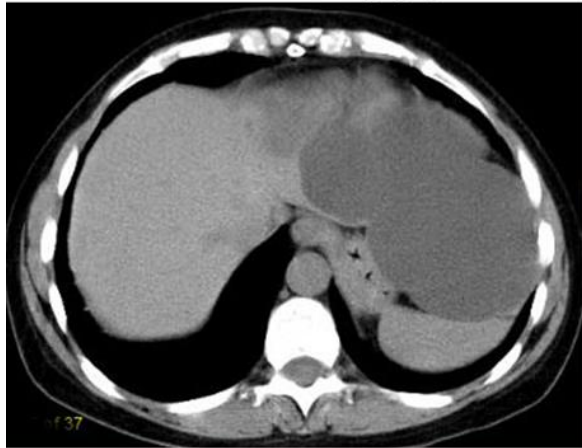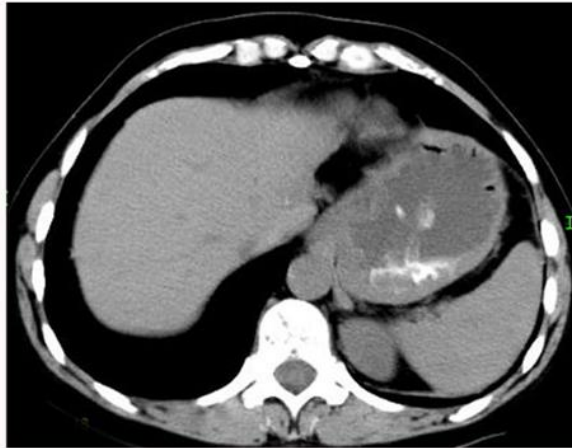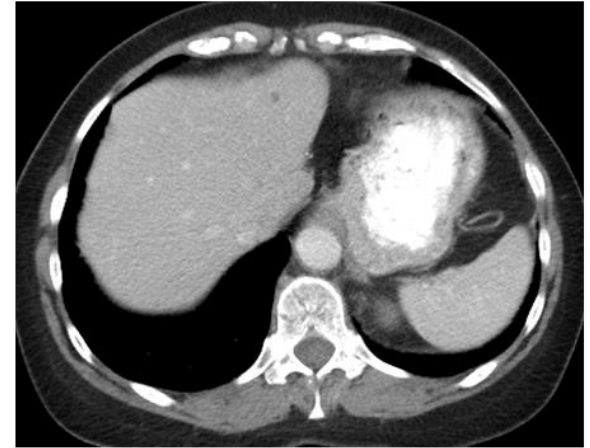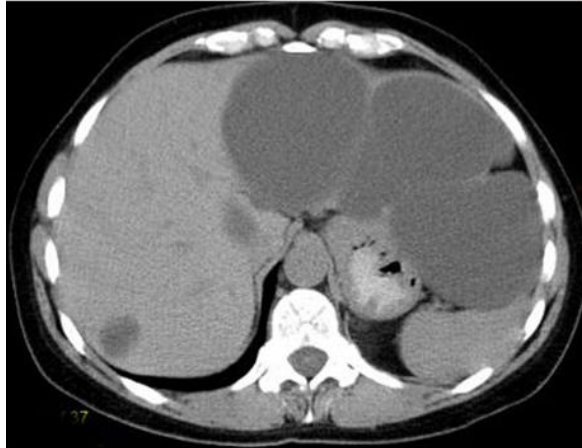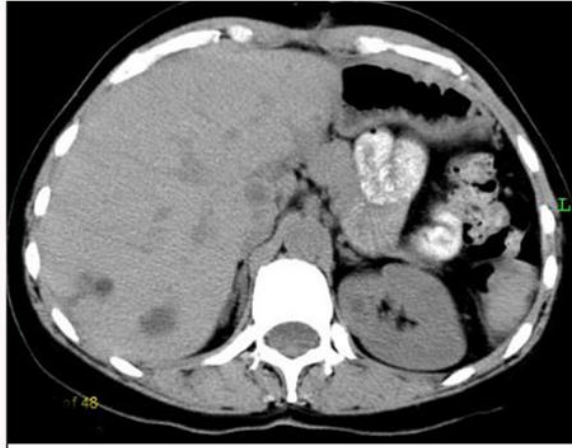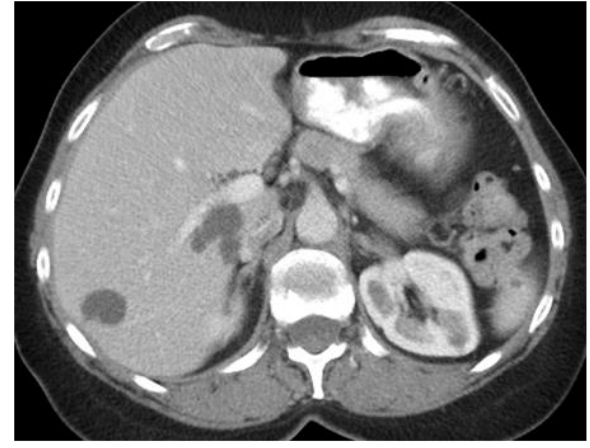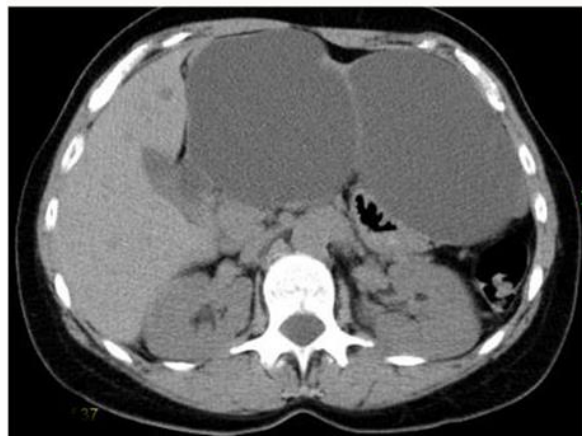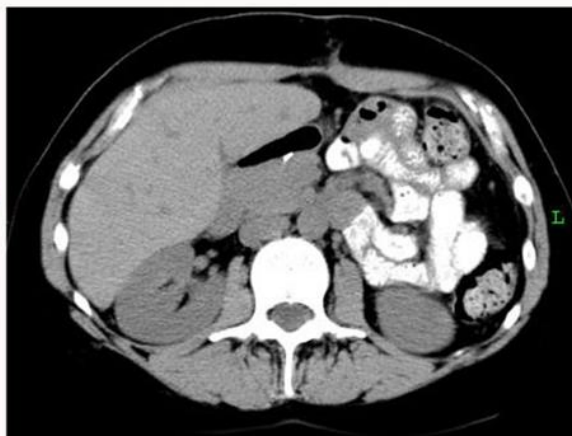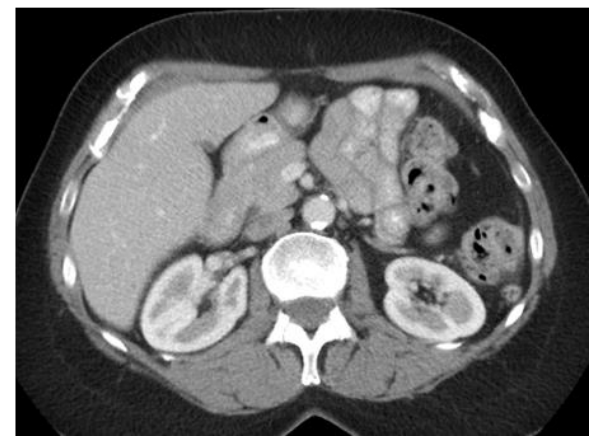

November-2004

February-2005

April-2011

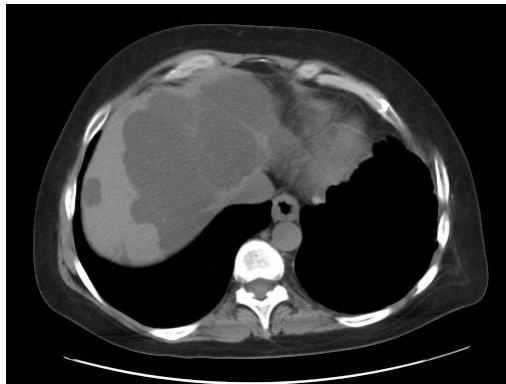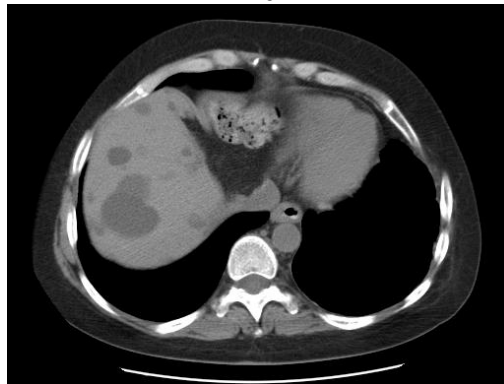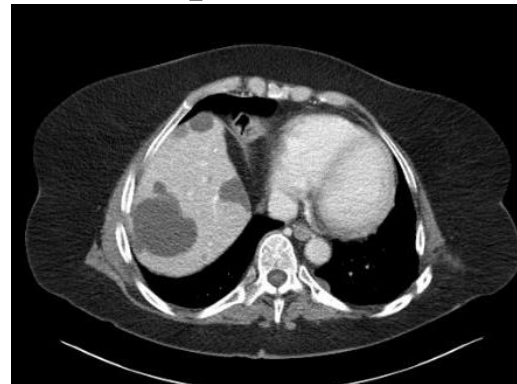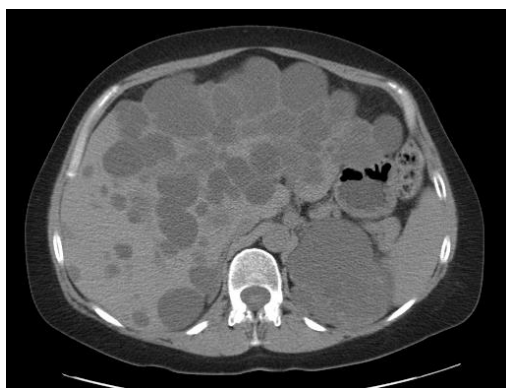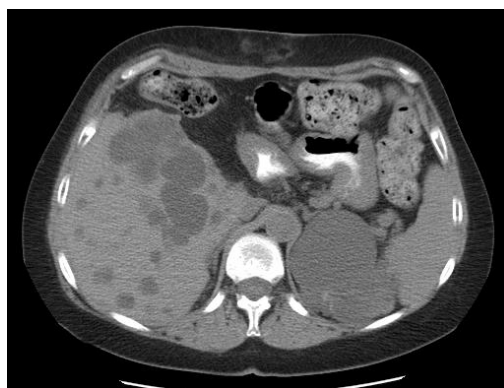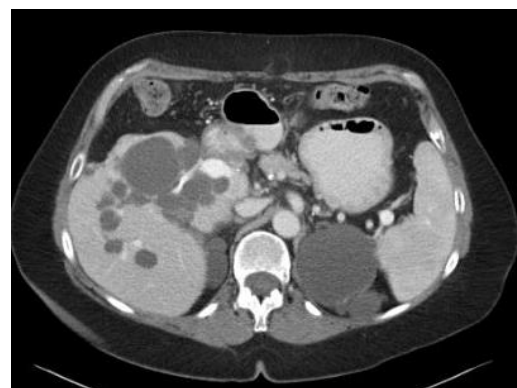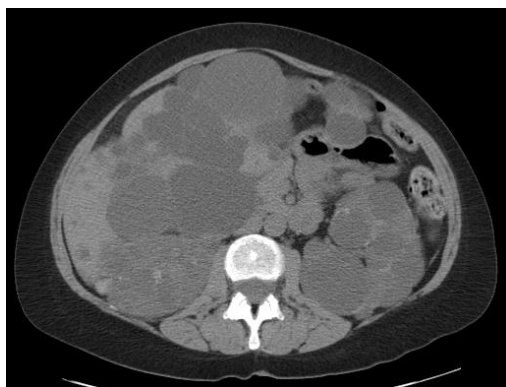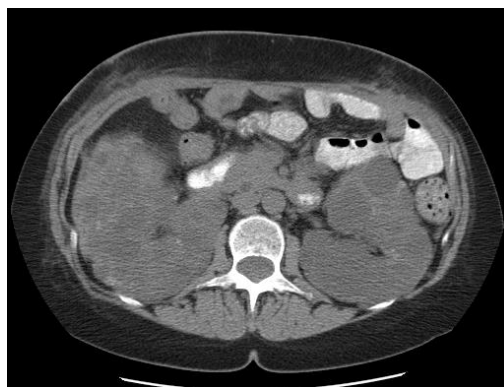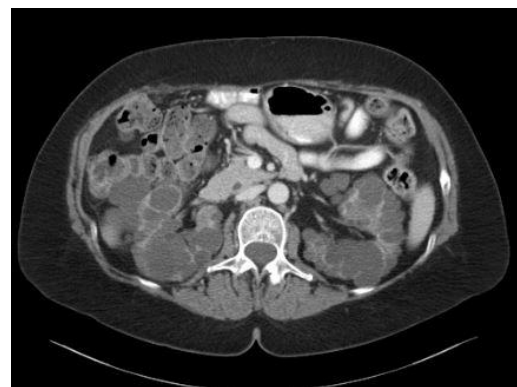

May-1997

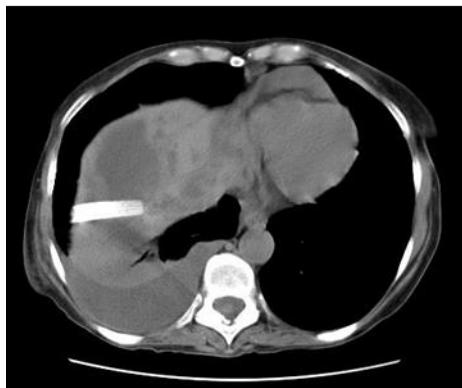

December-1997

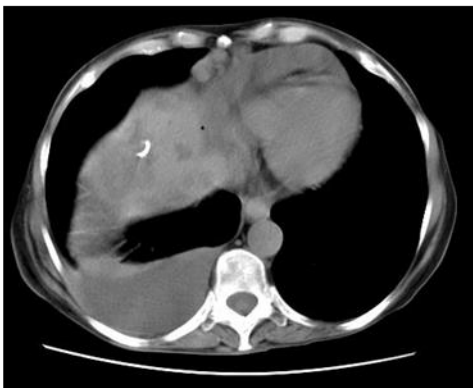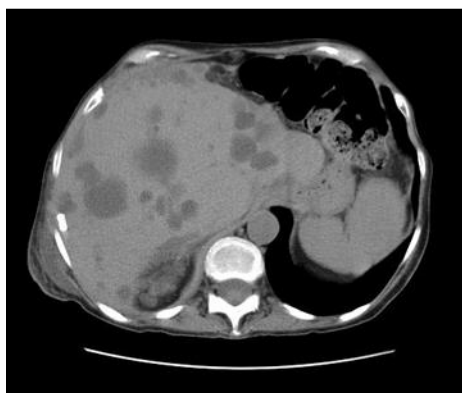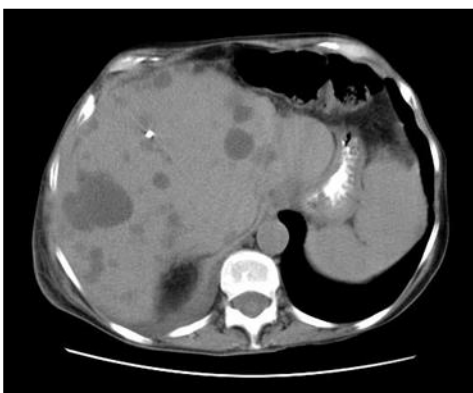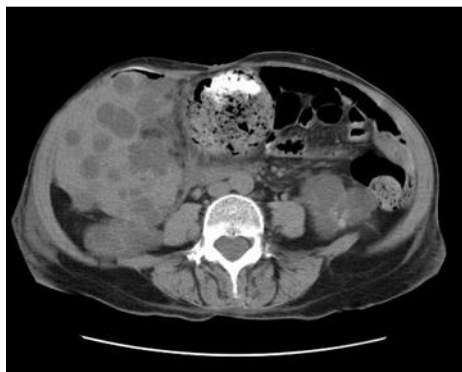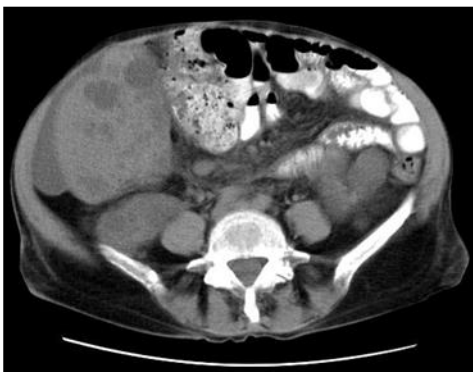

October-2012

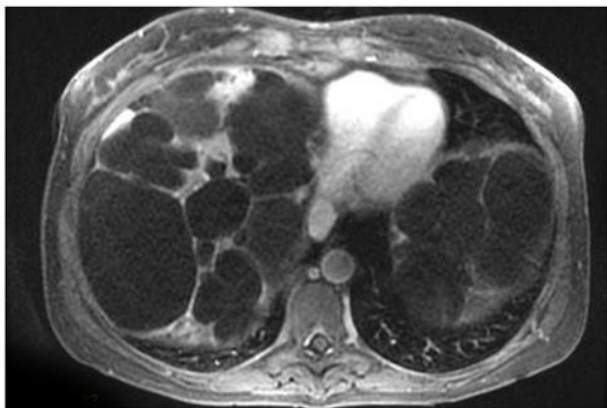

November-2012

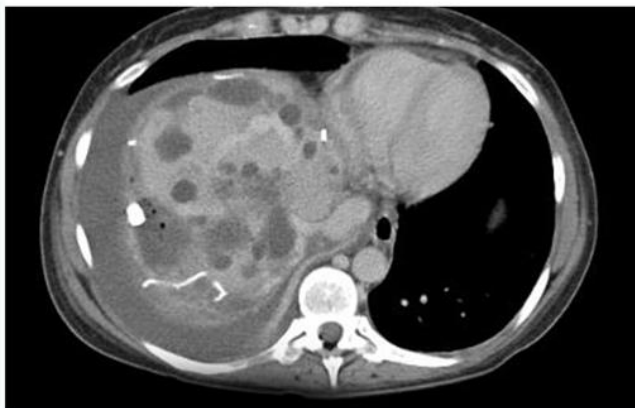

Februrary-2015

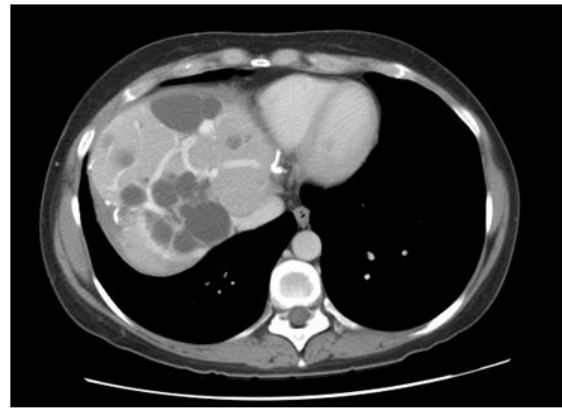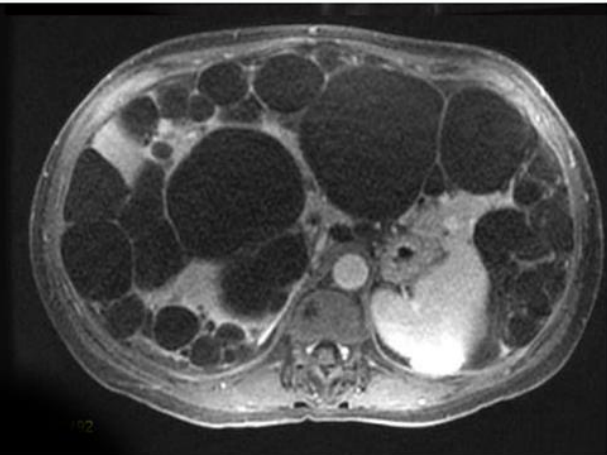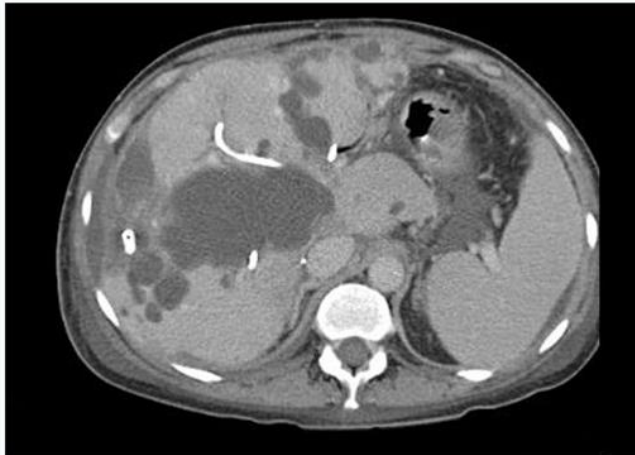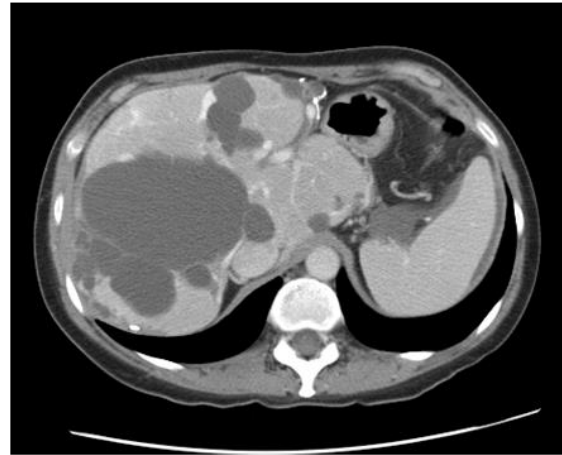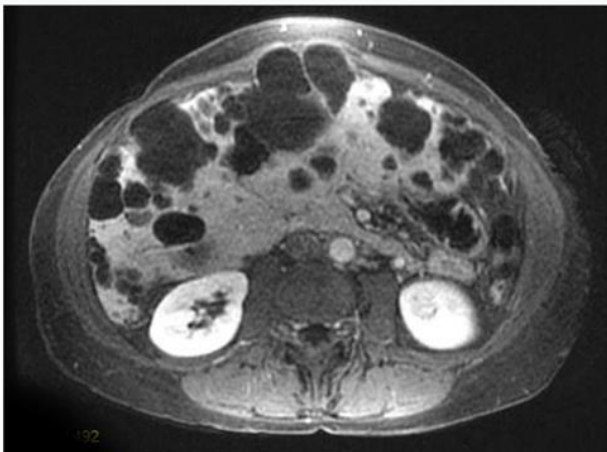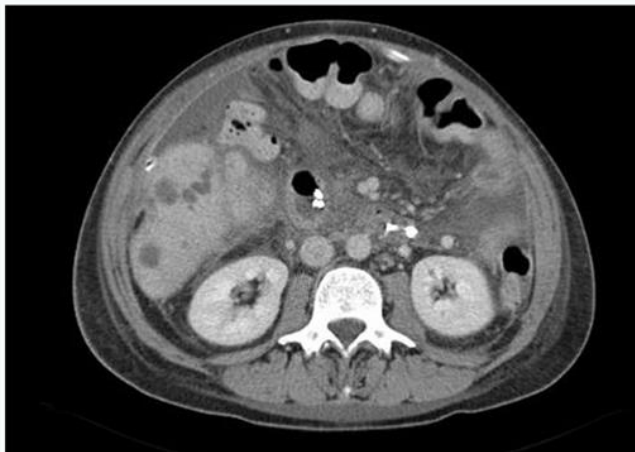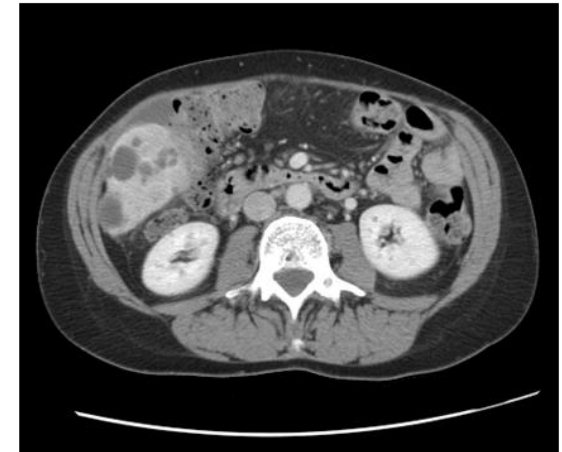

January-2012

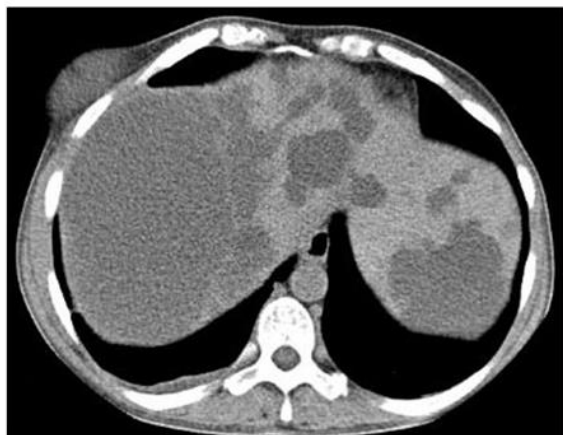

August-2012

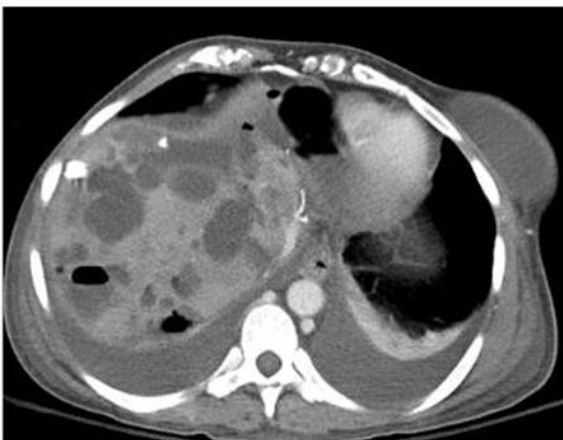

May-2014

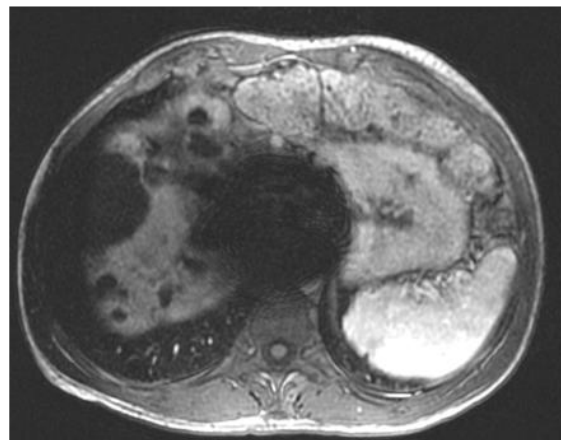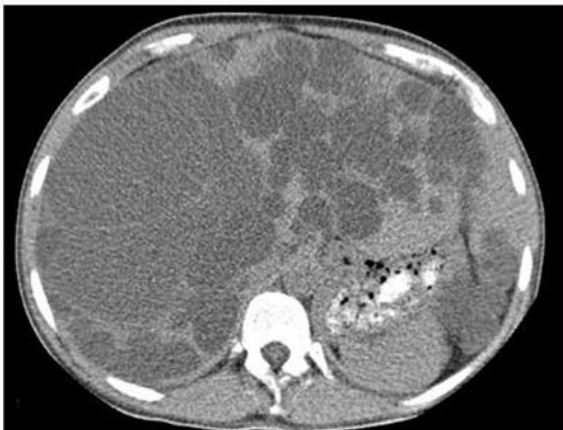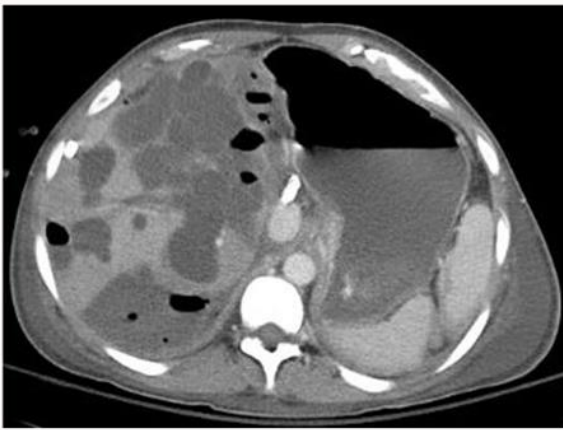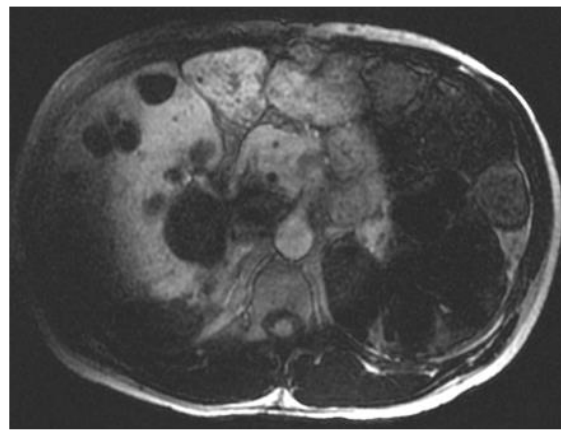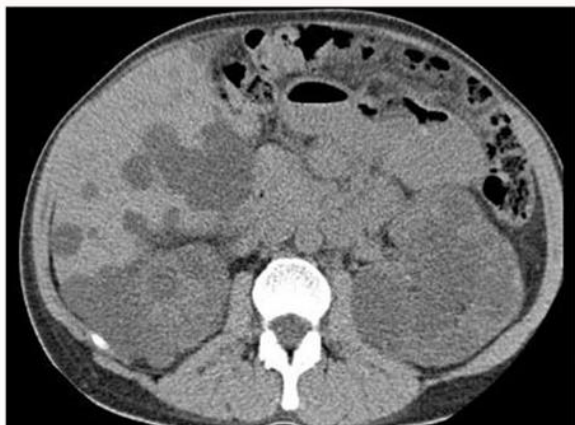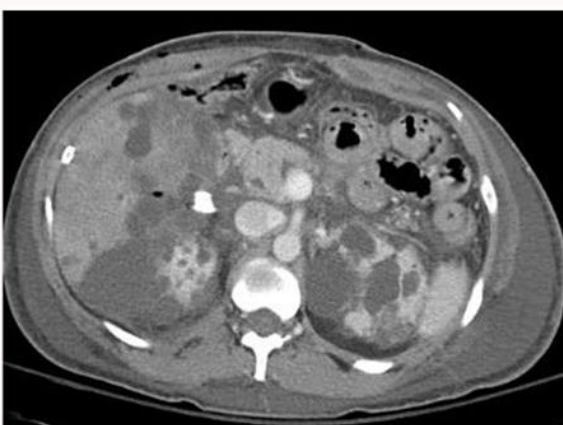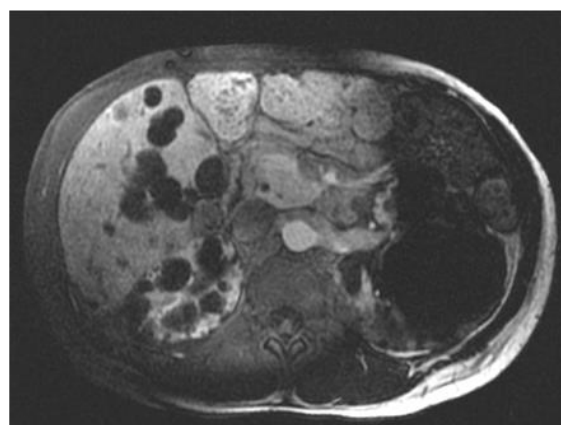



February-2013

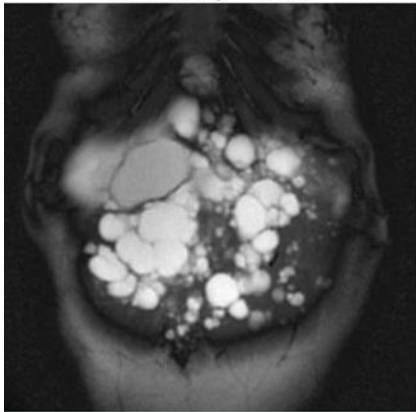

September-2013

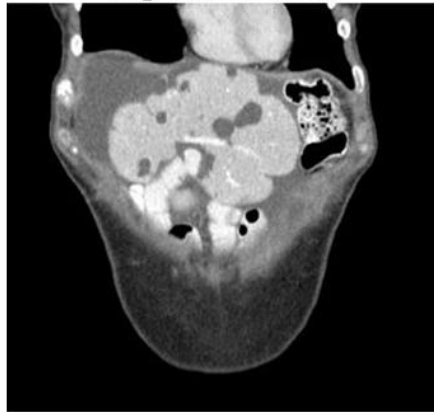

May-2014

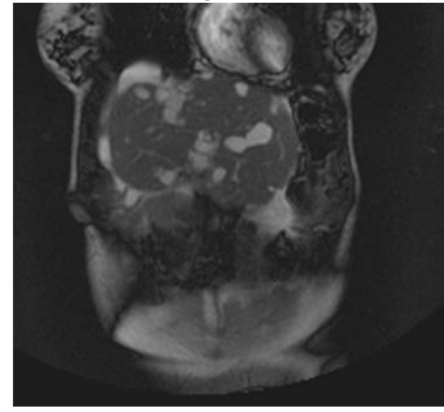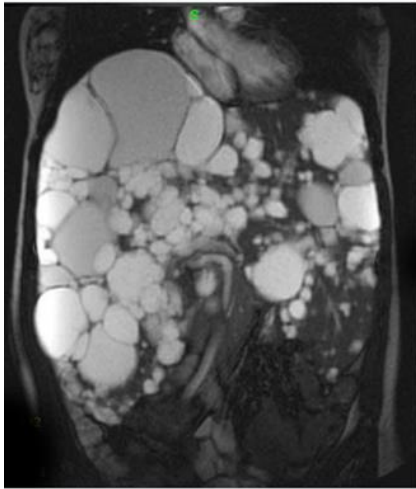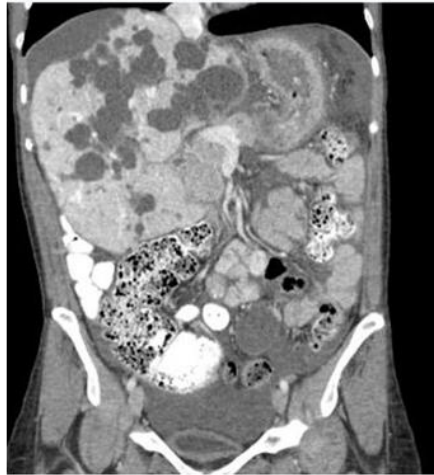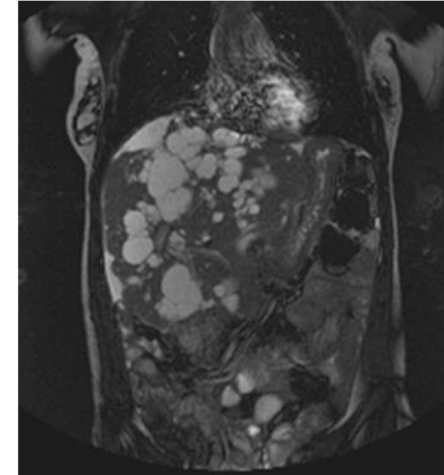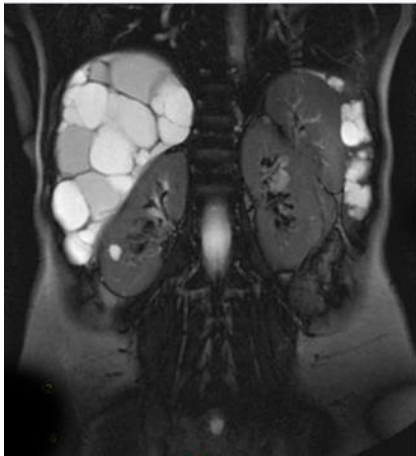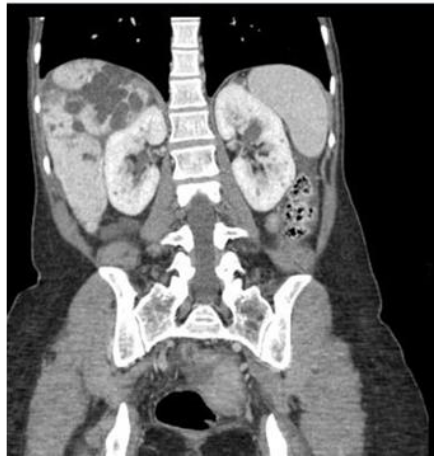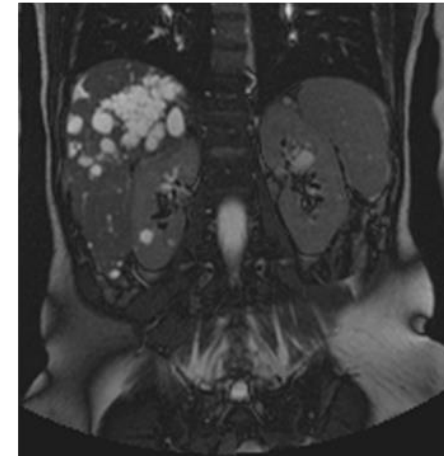

December-1993

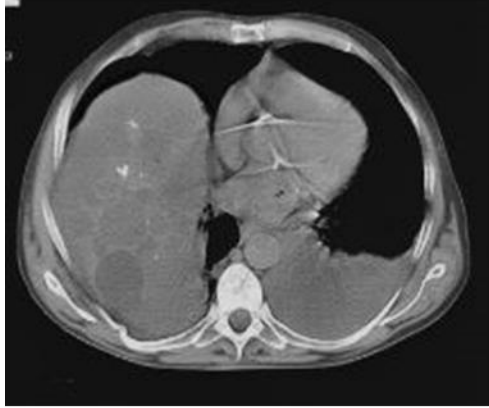

January-1994

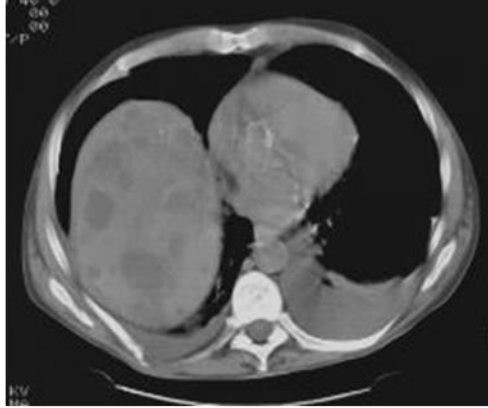

February-2011

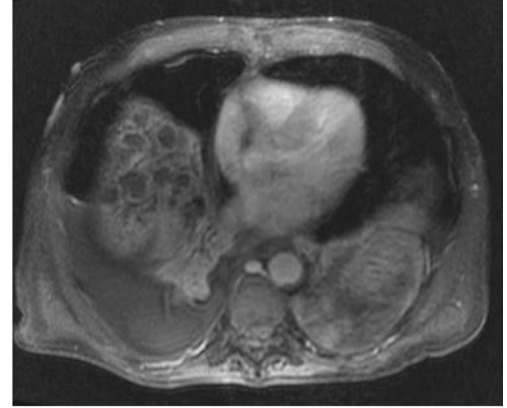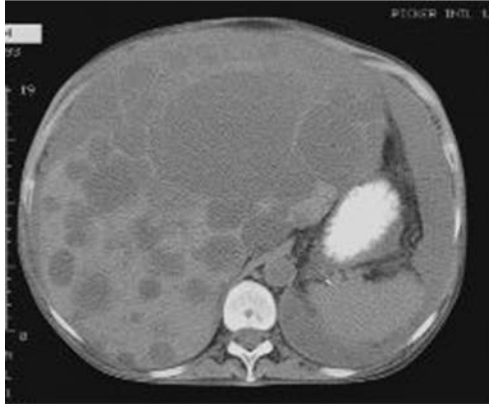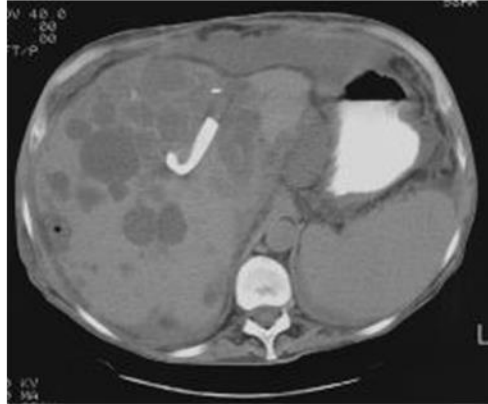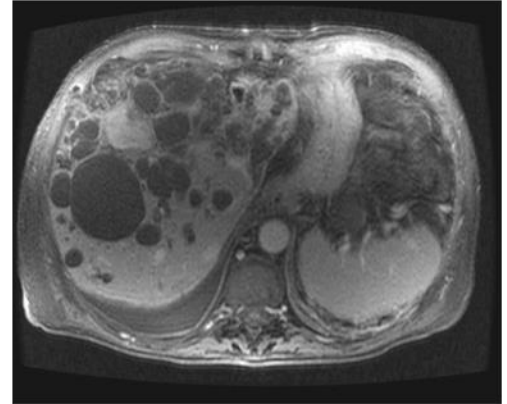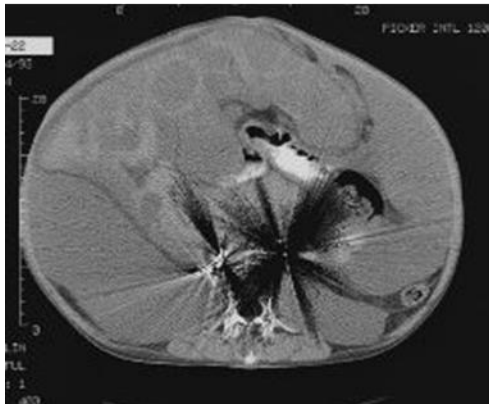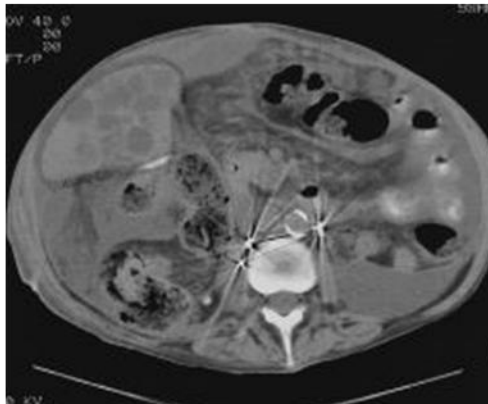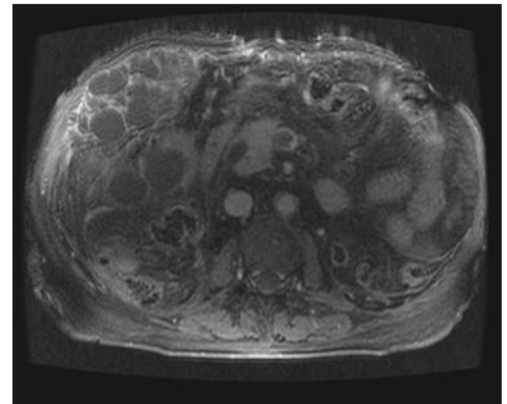

June-2011

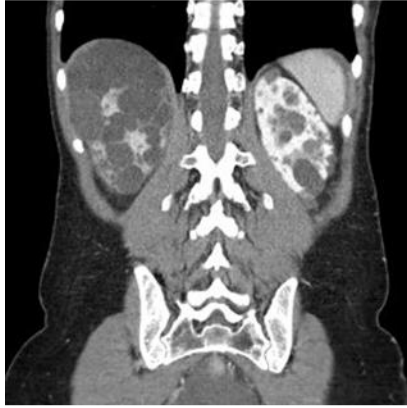

October-2011

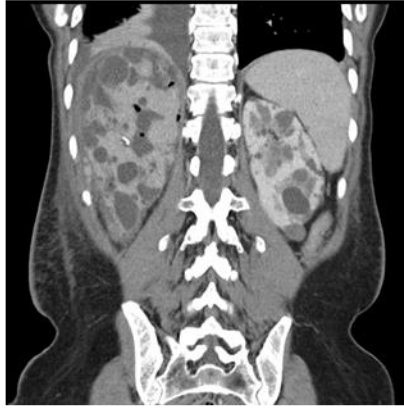

May-2014

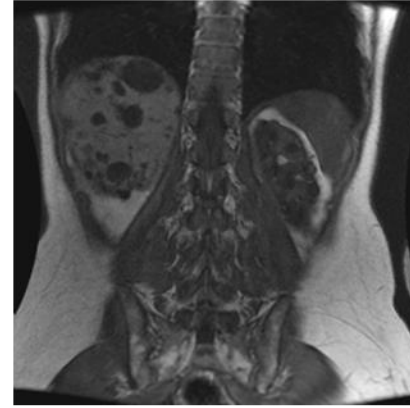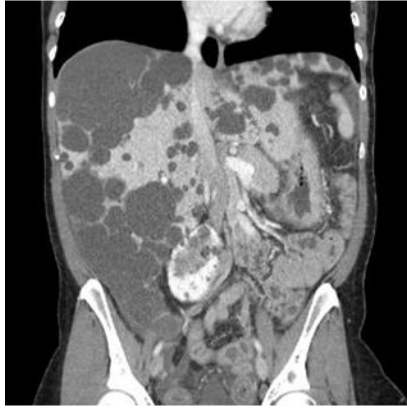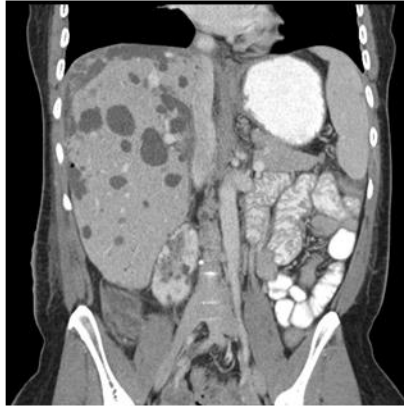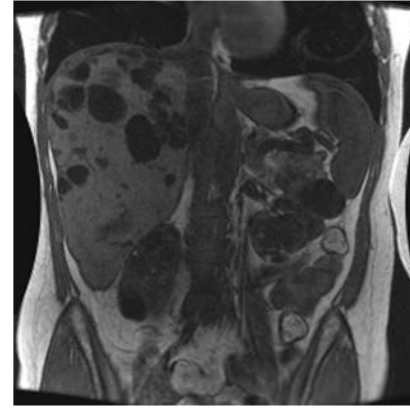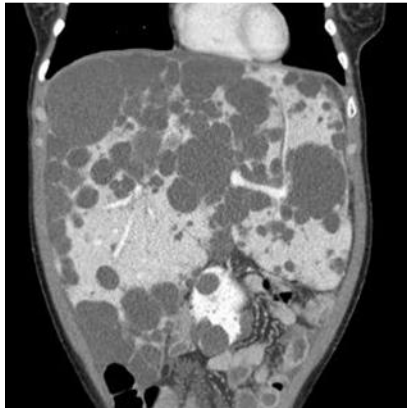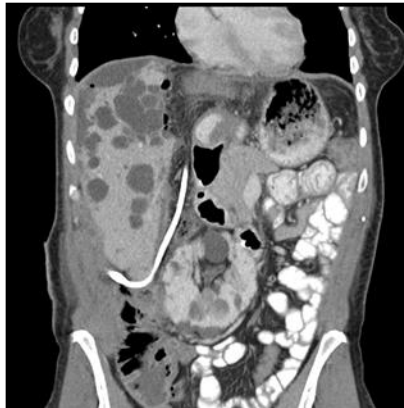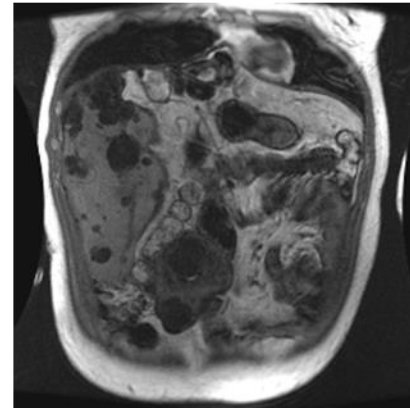

January-2012

June-2012

December-2013

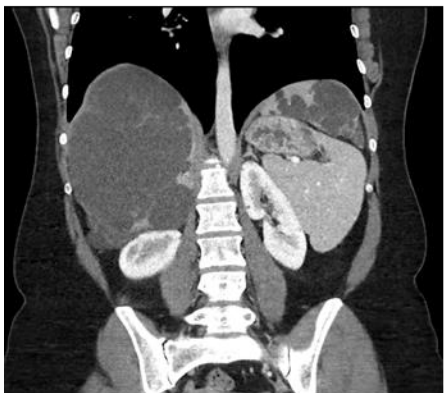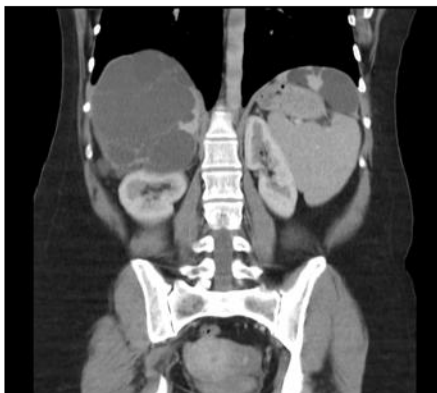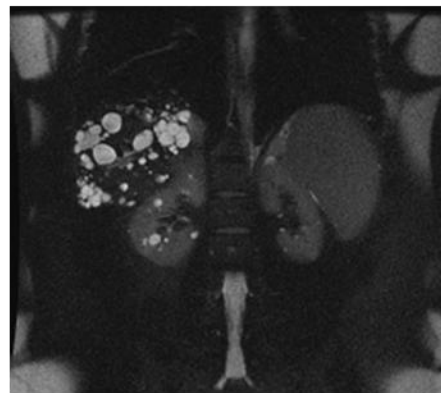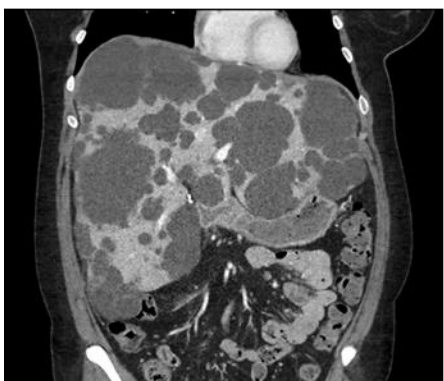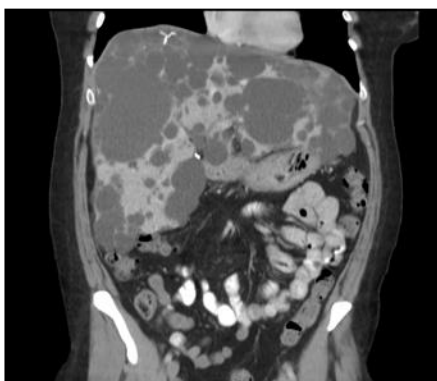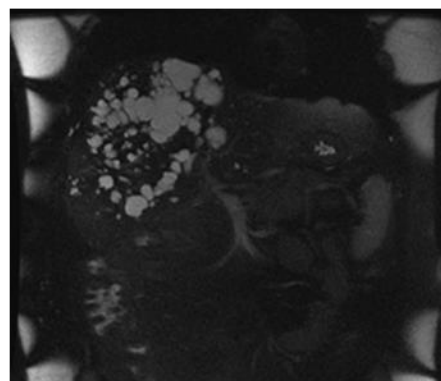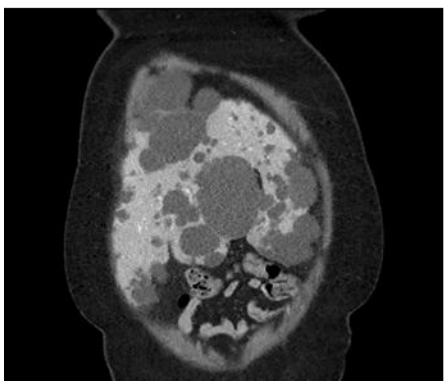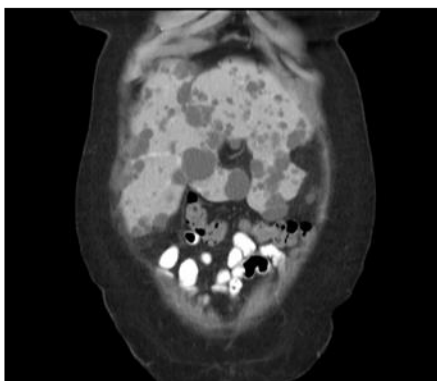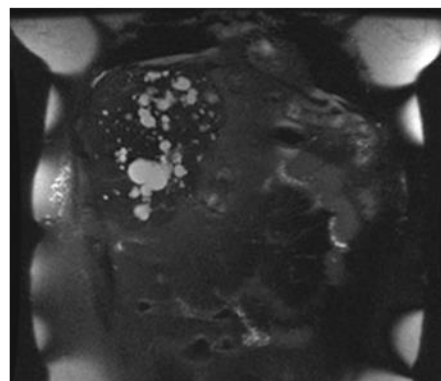

July-1989

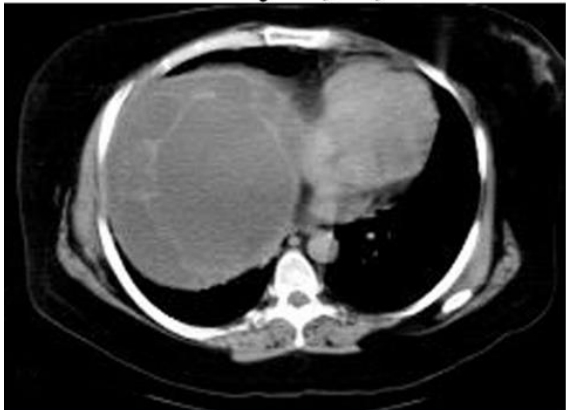

November-1990

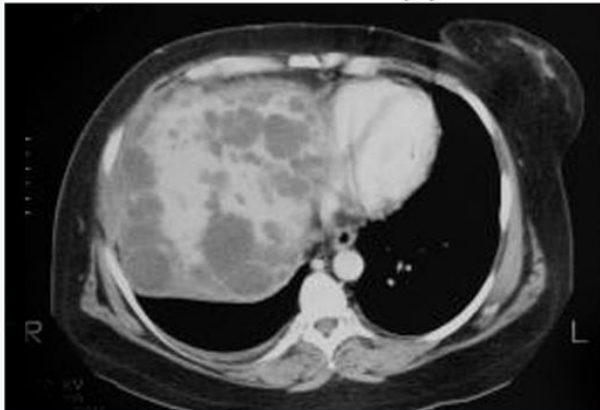

December-1991

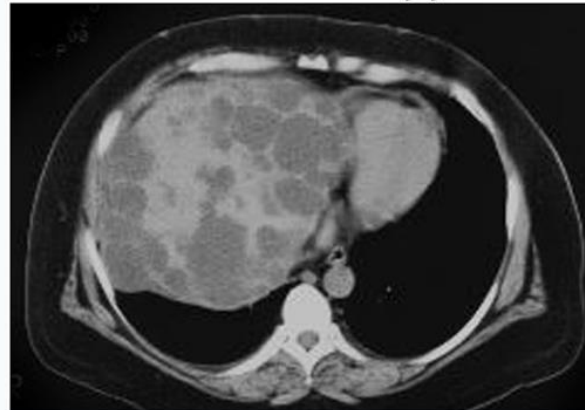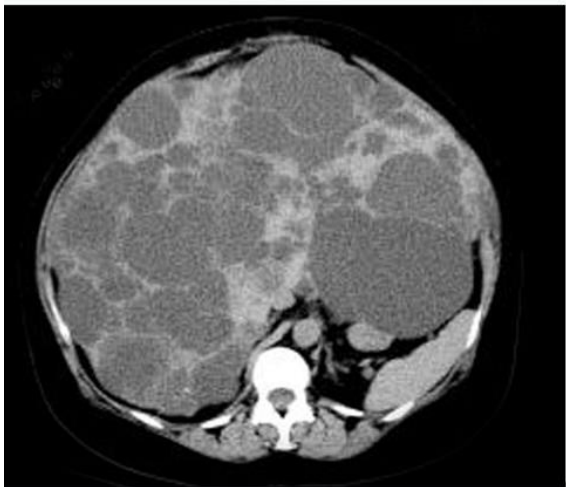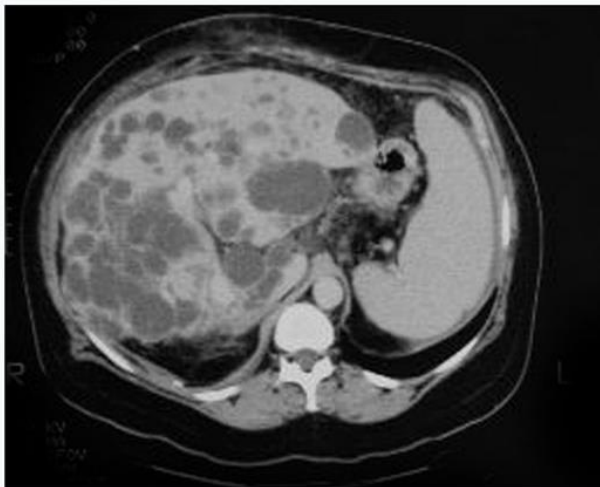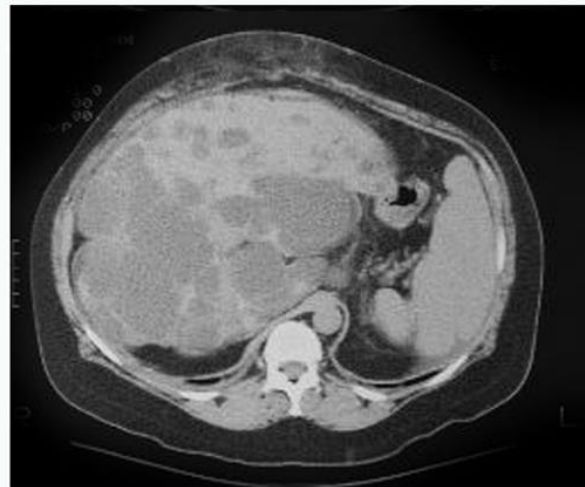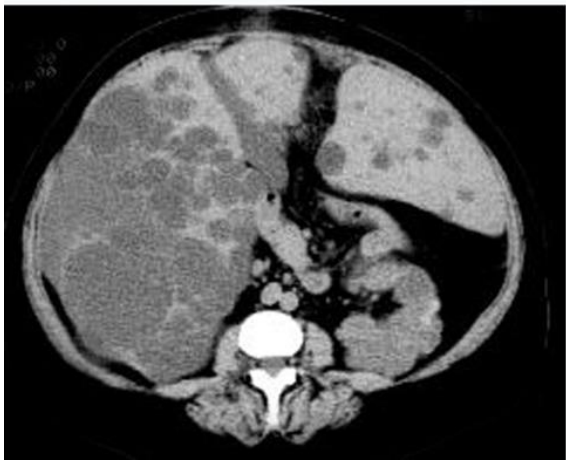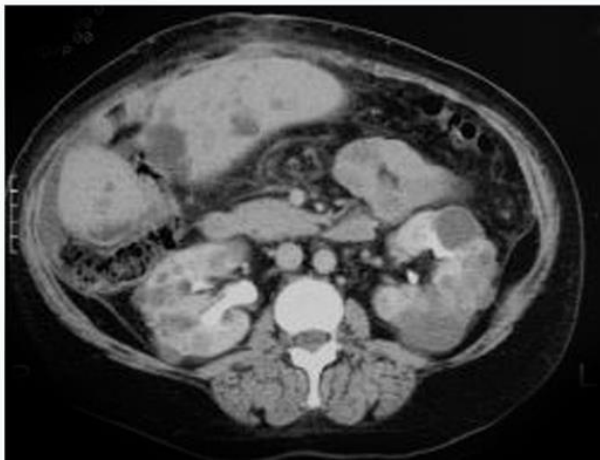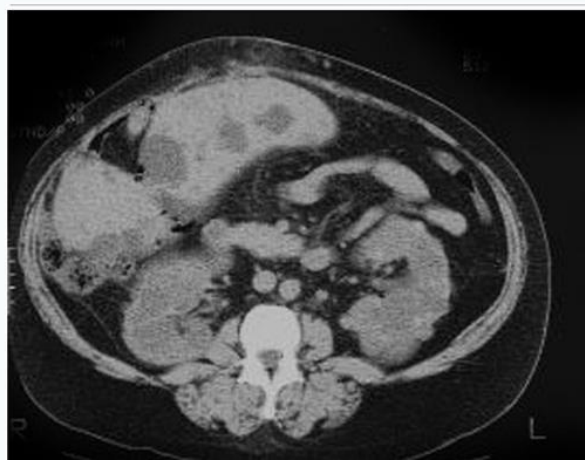

January-2011

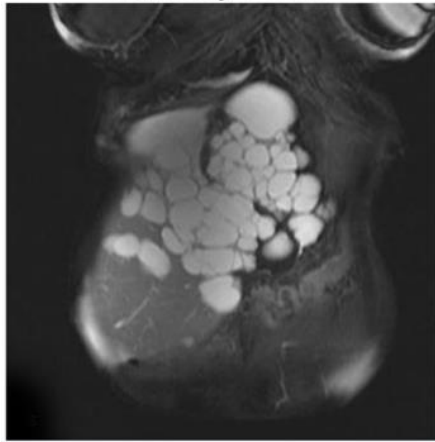

June-2011

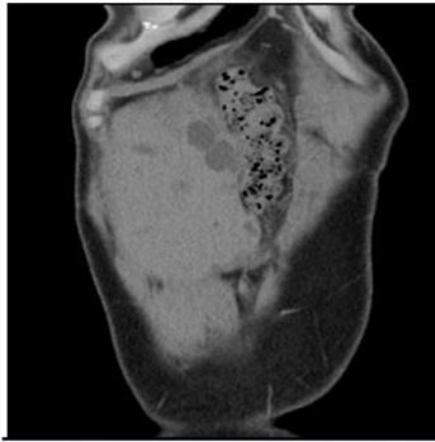

January-2015

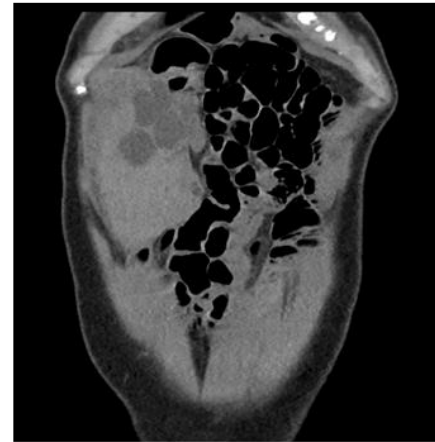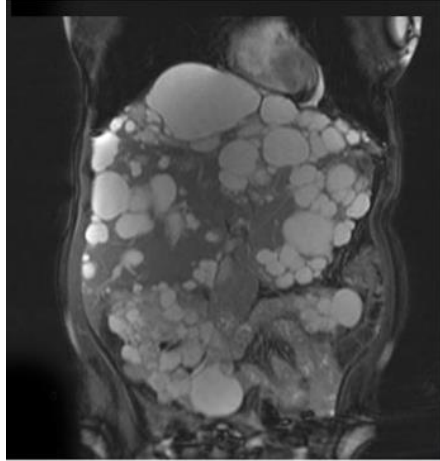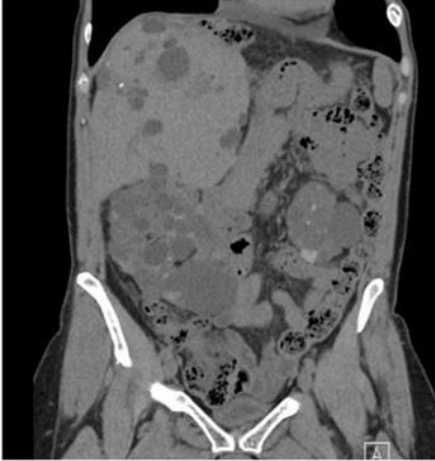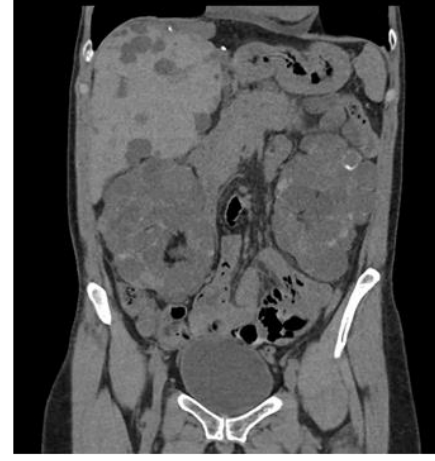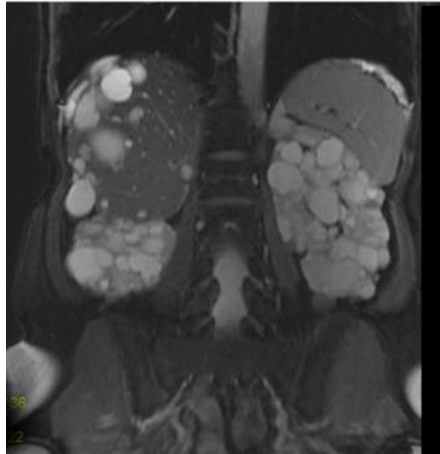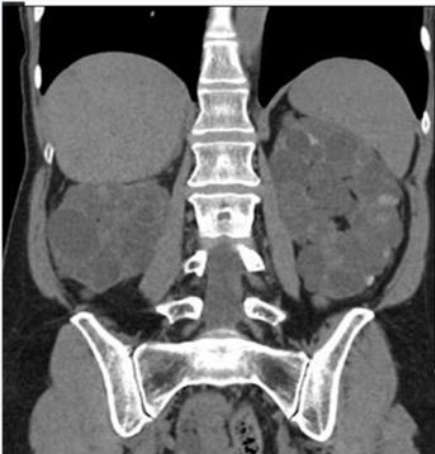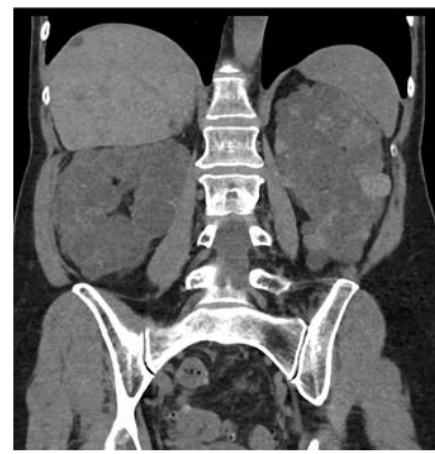

May-2001

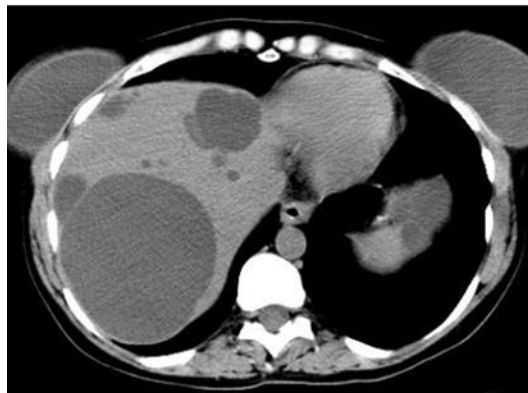

September-2001

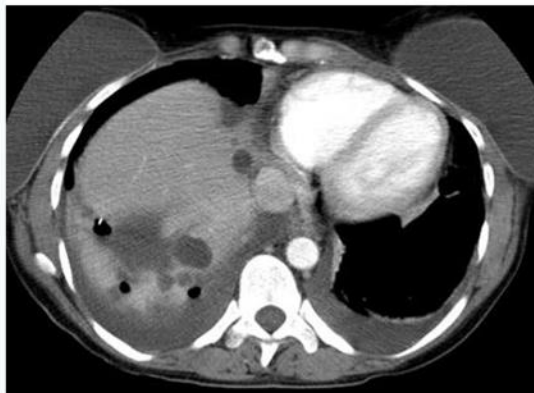

July-2011

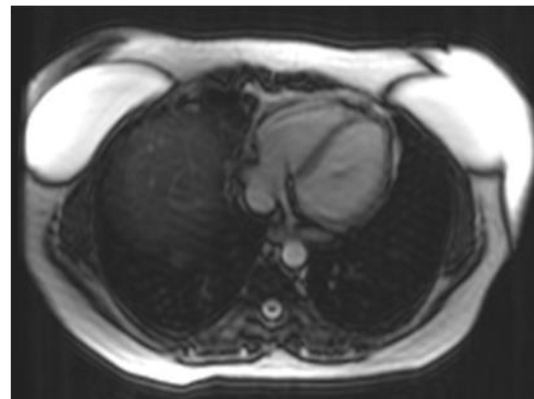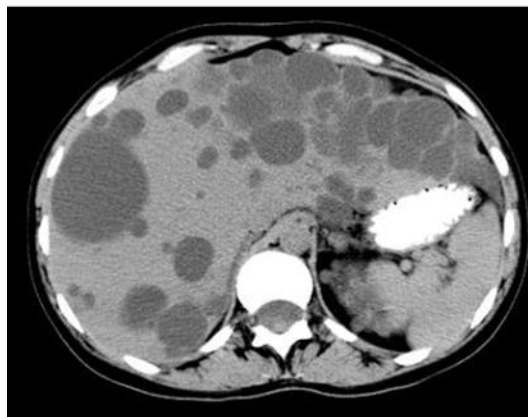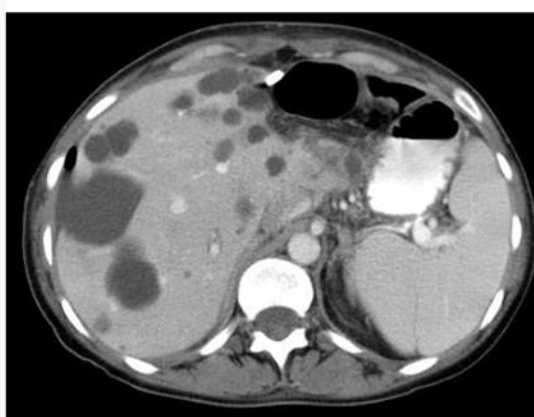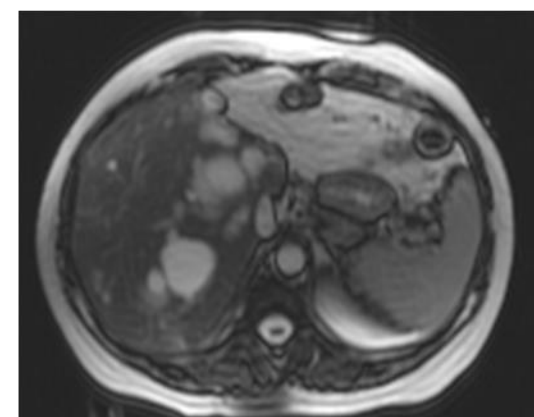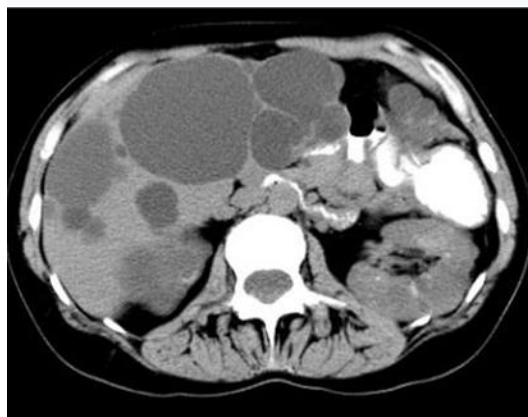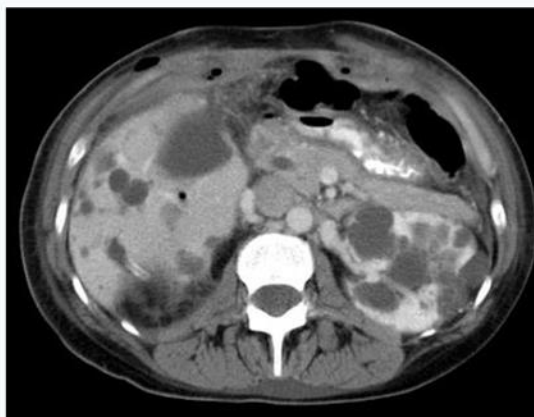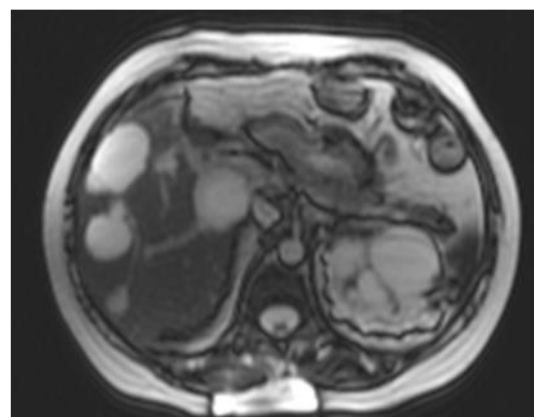

March-2009

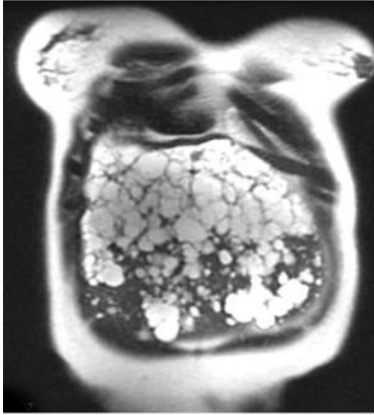

November-2009

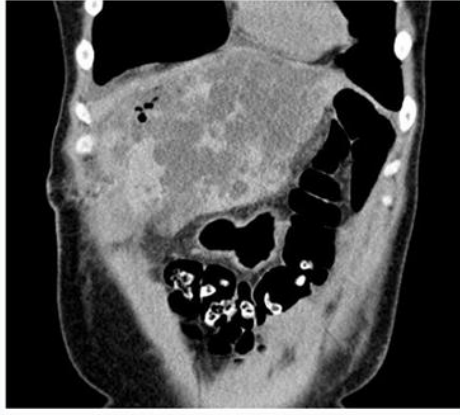

March-2015

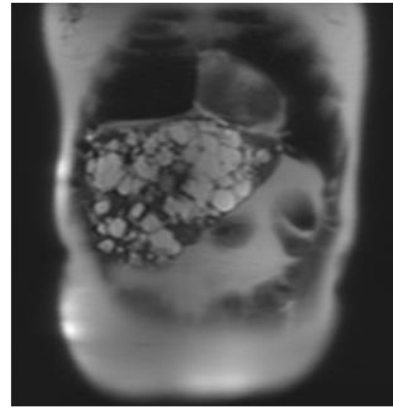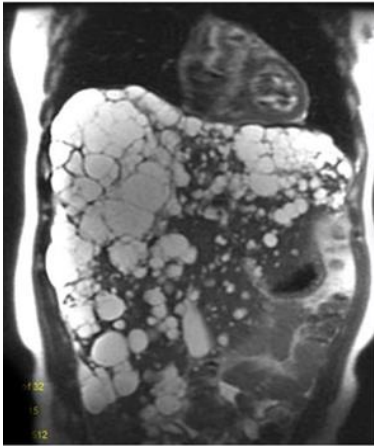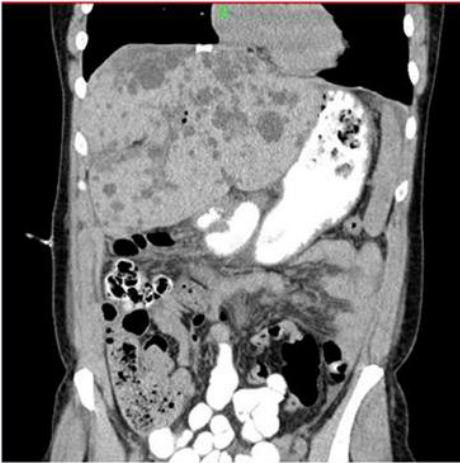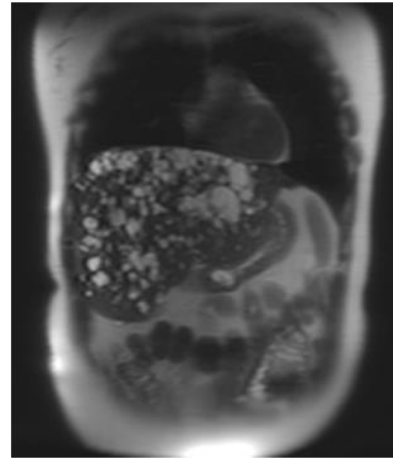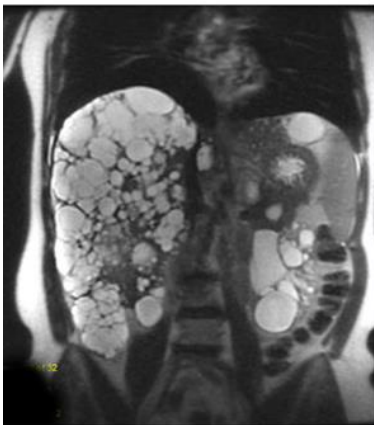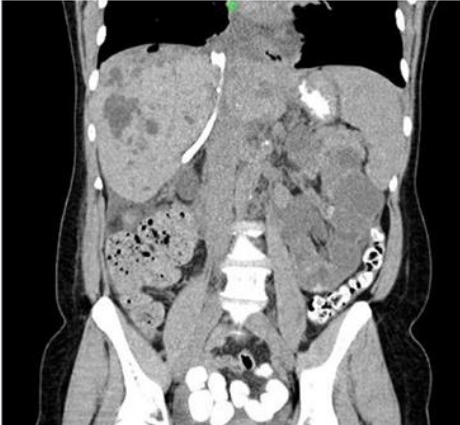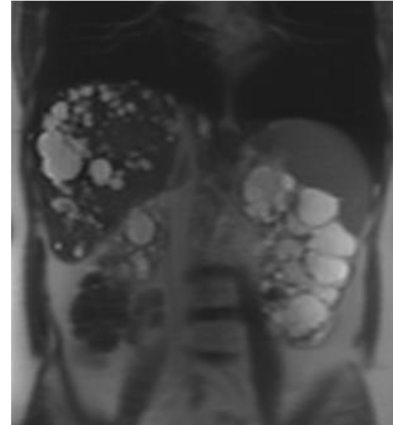



September-2004

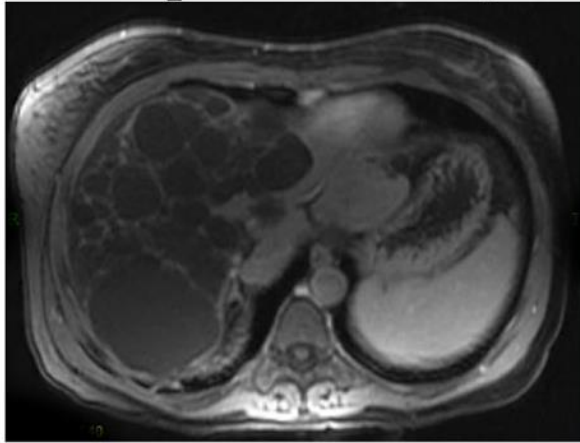

April-2005

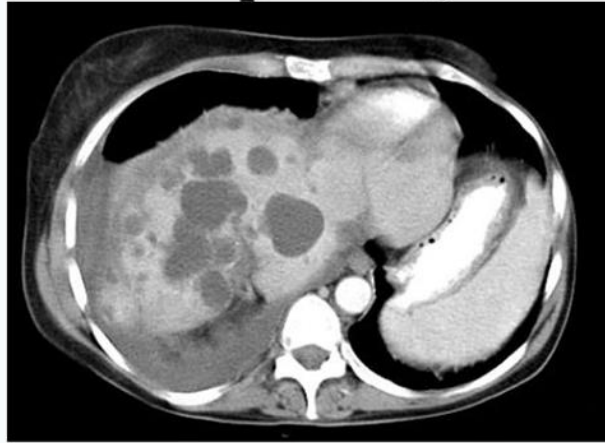

March-2015

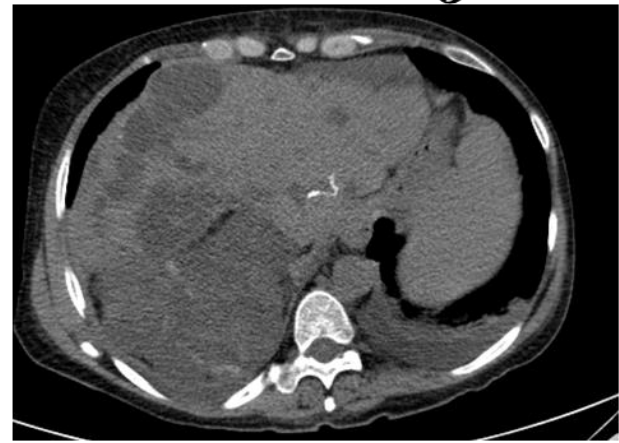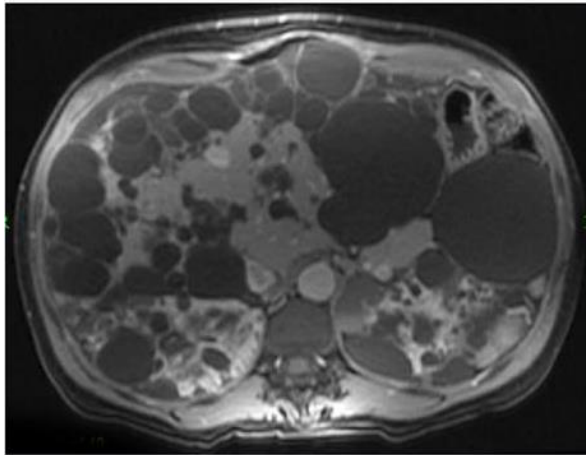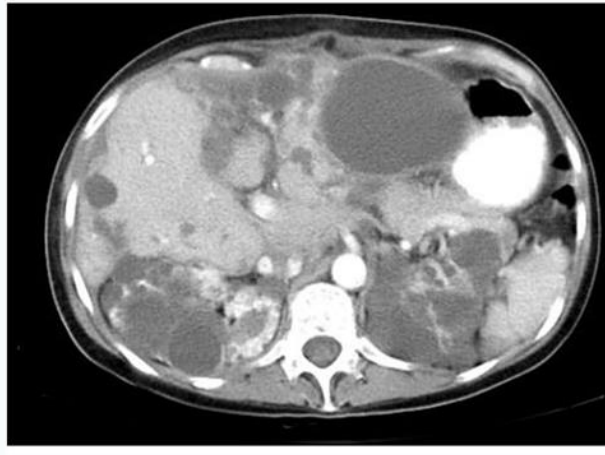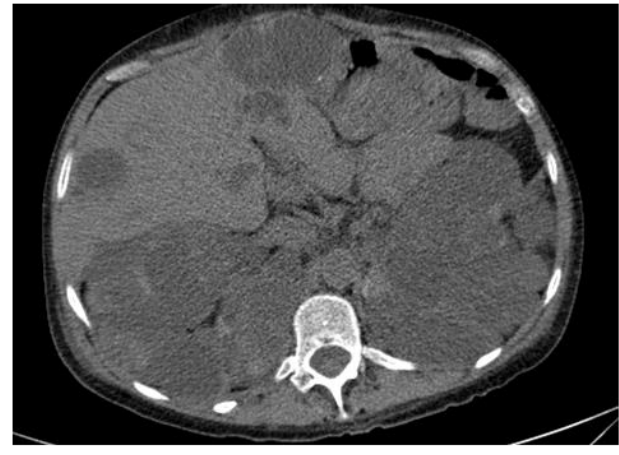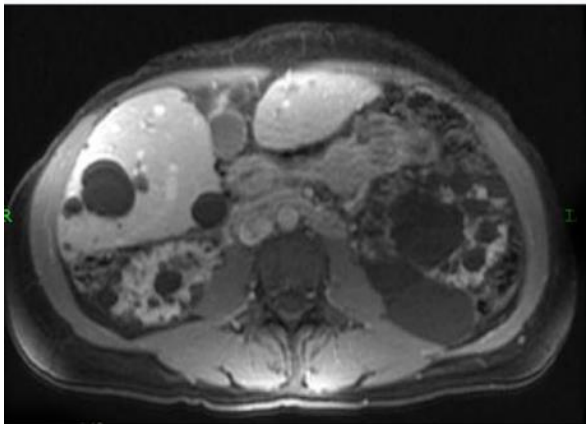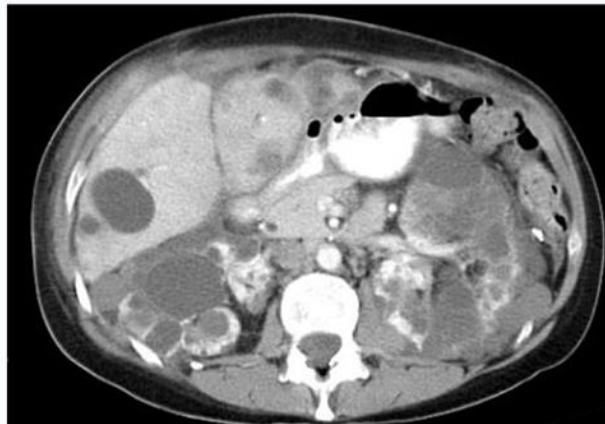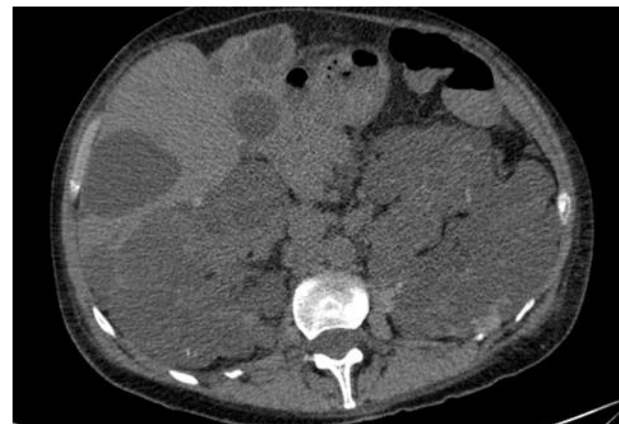

September-1996

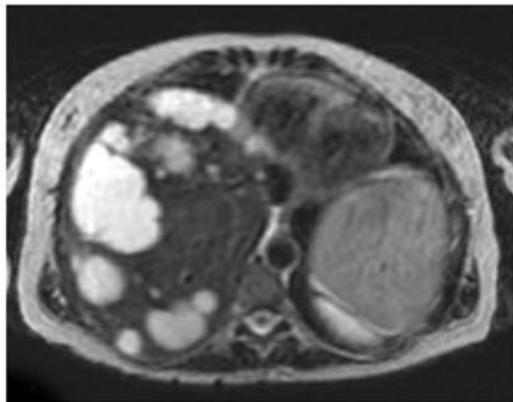

October-1996

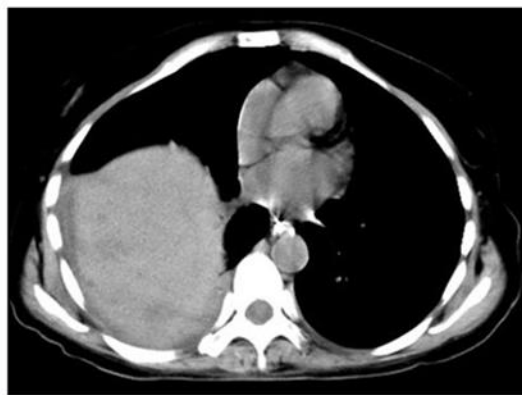

May-2014

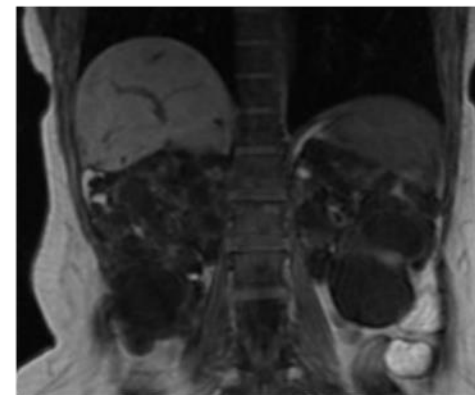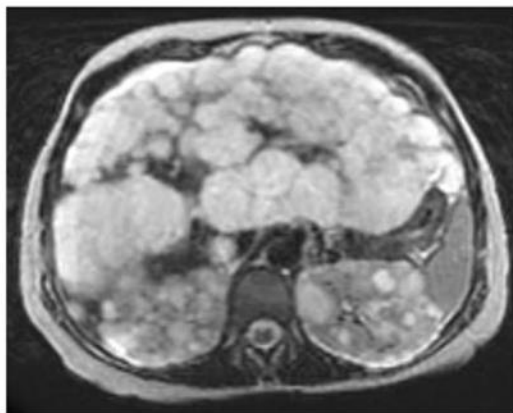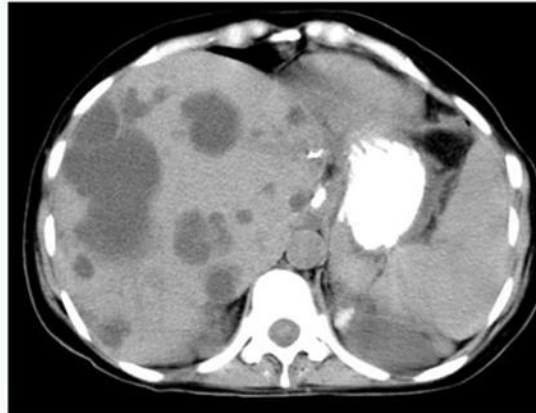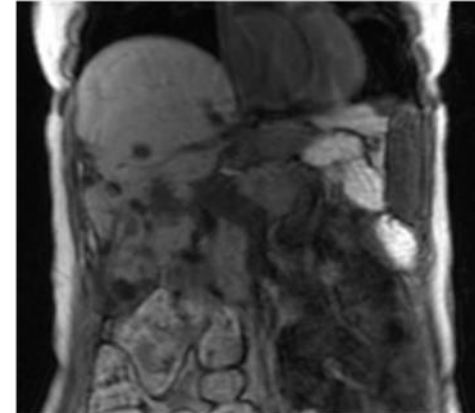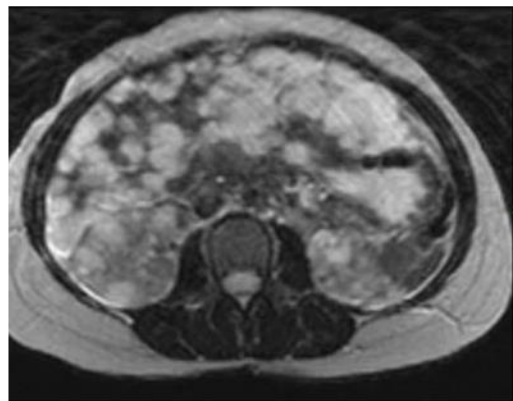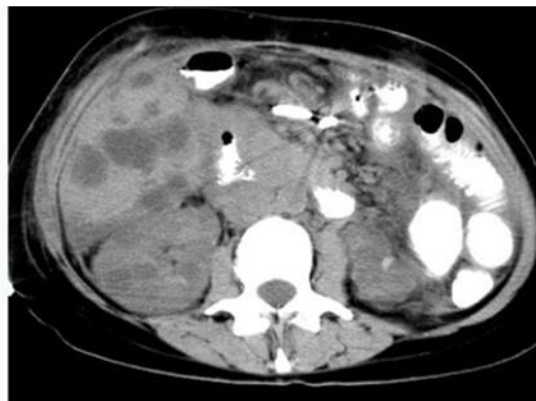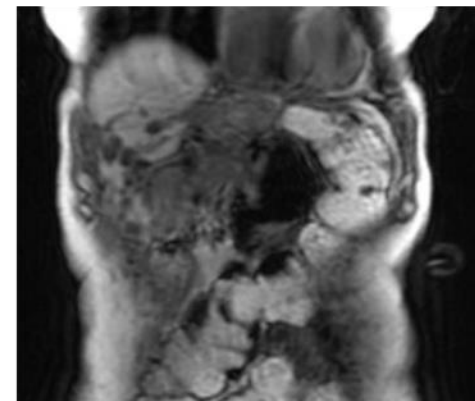

August-2012

March-2013

July-2015

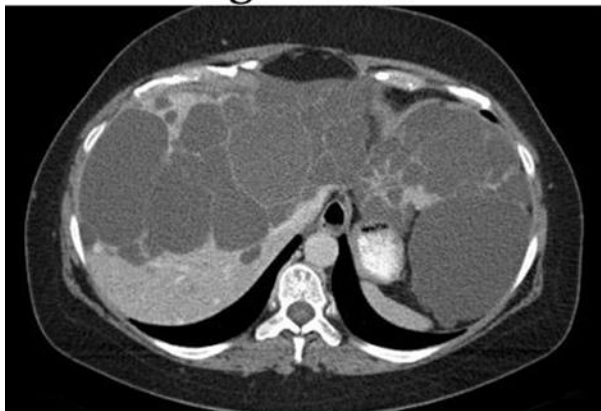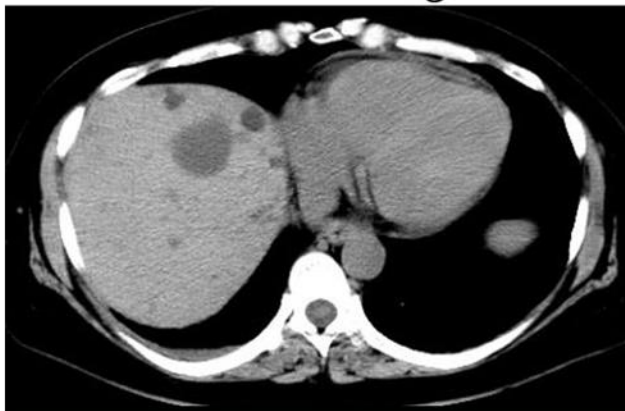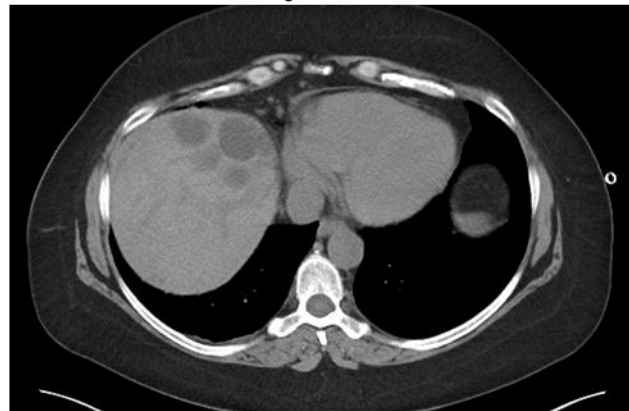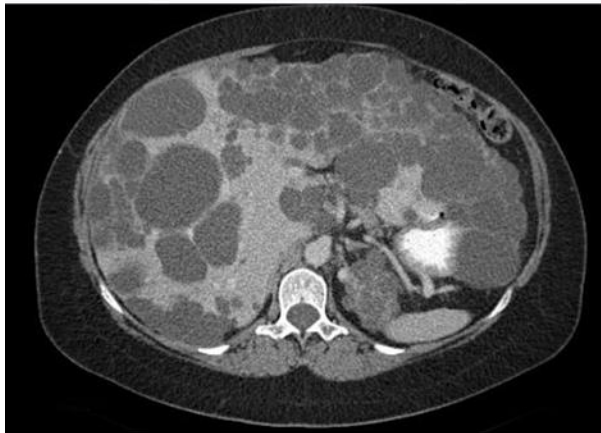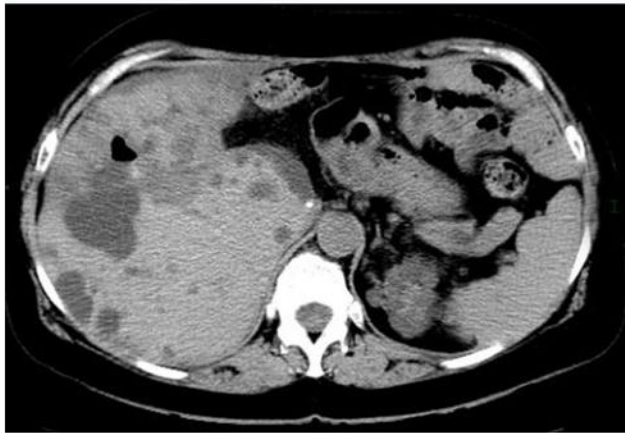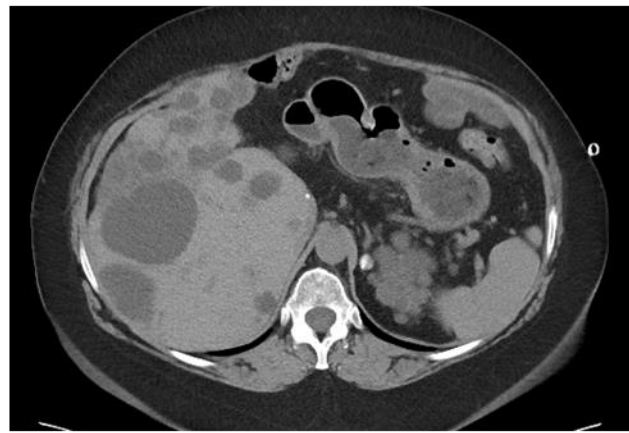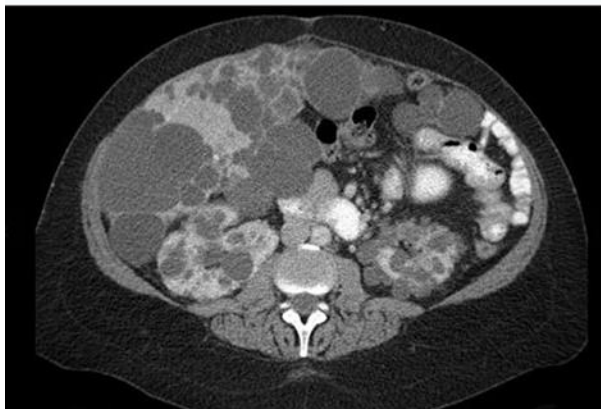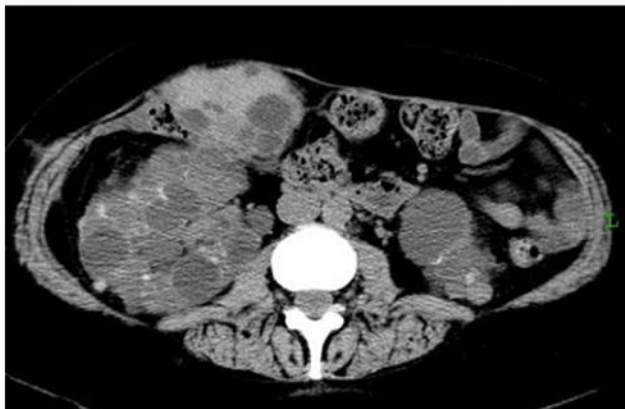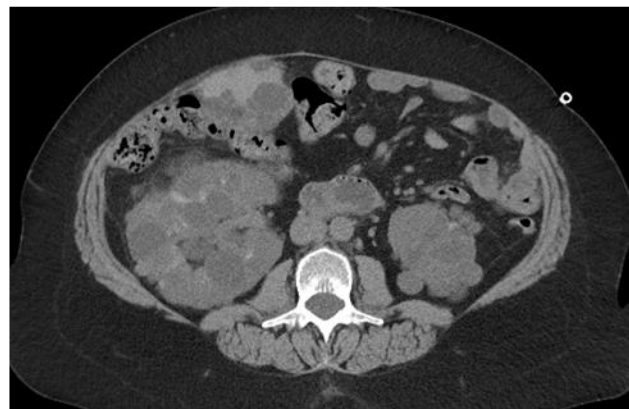

June-2007

October-2007

October-2011

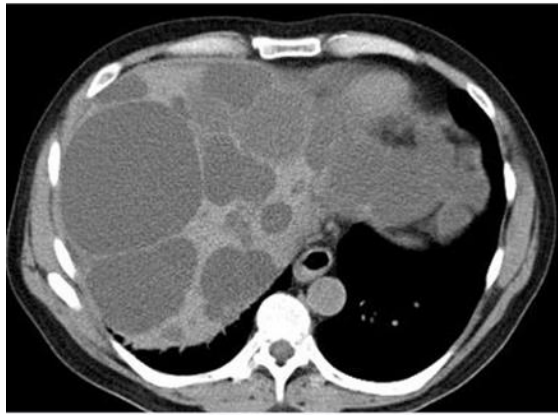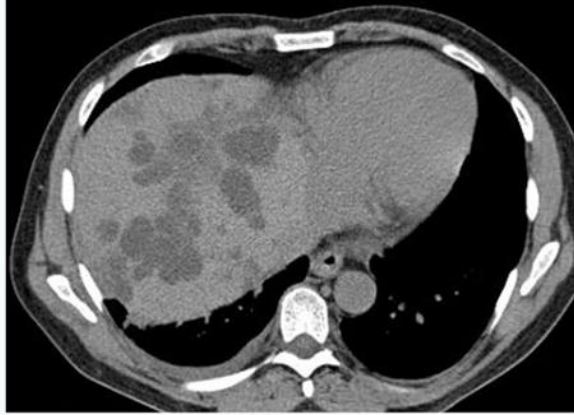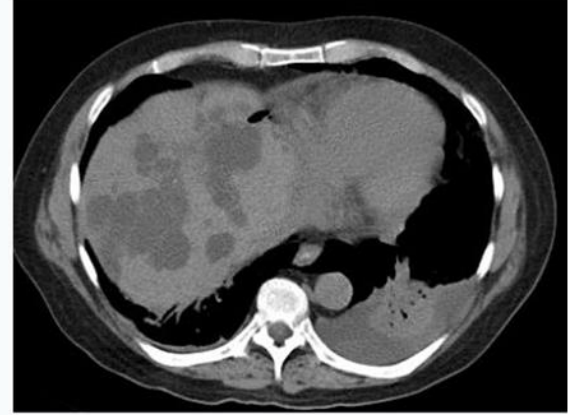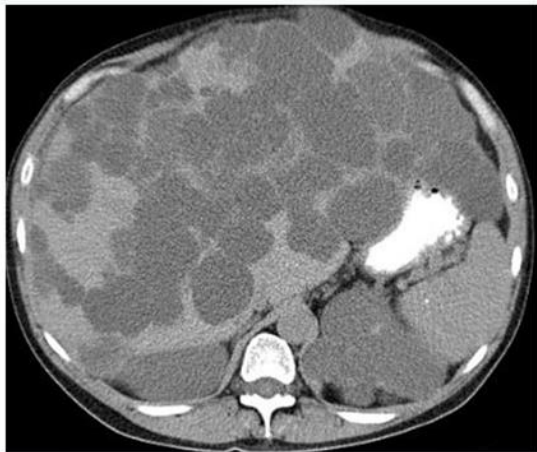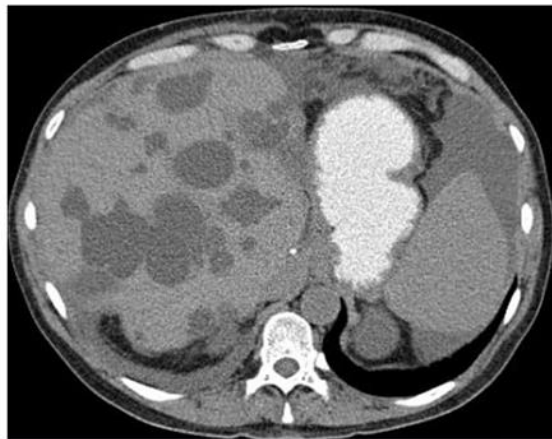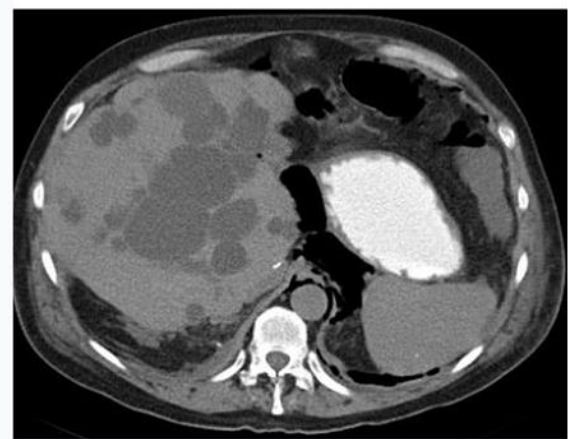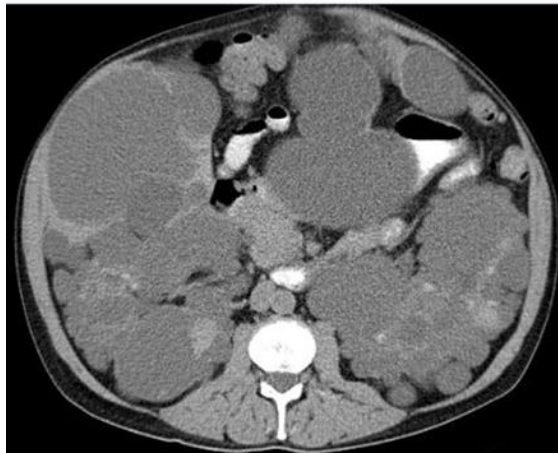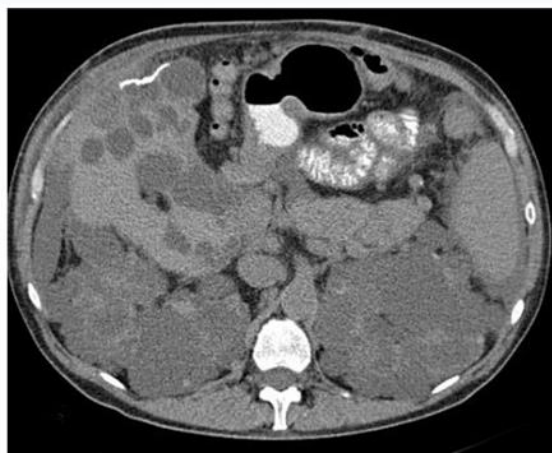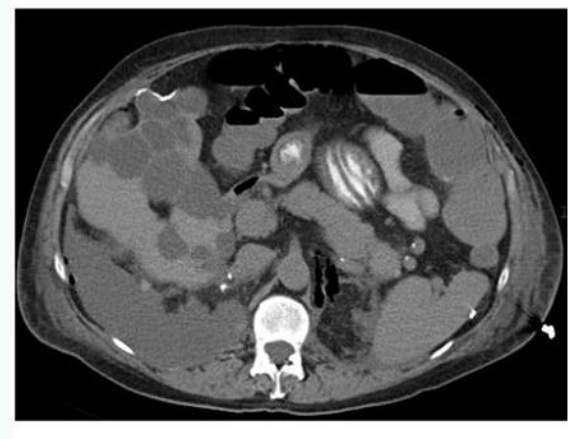

September-2006

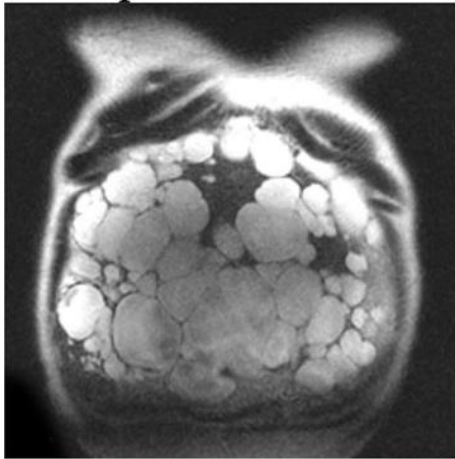

December-2006

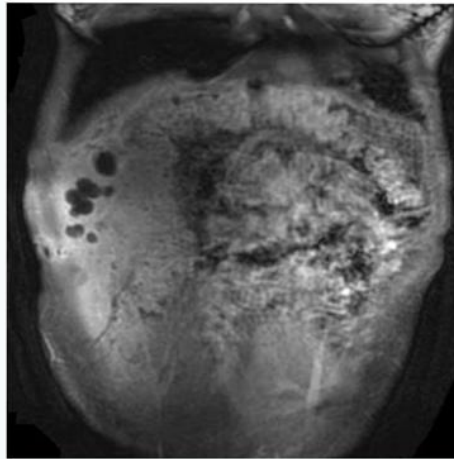

March-2015

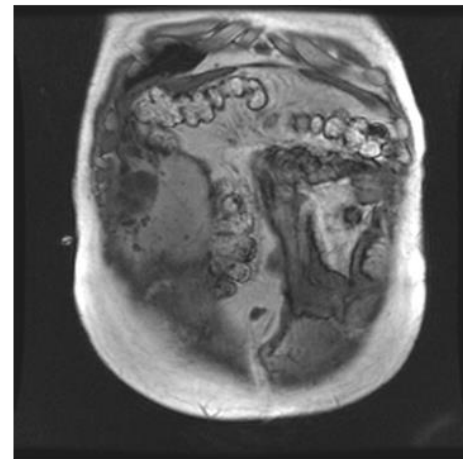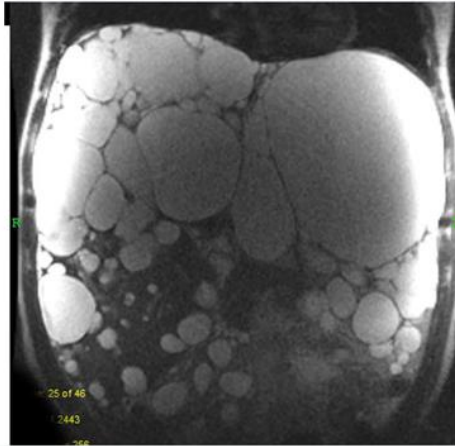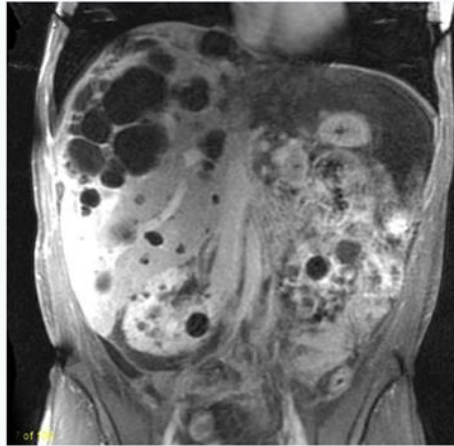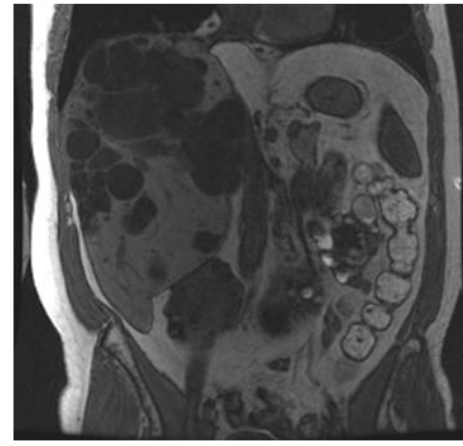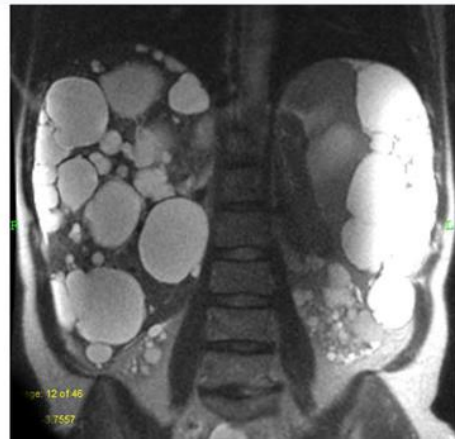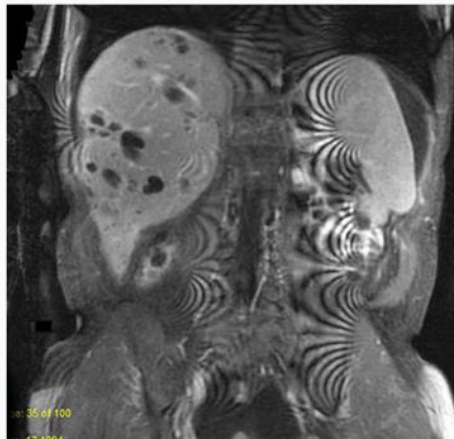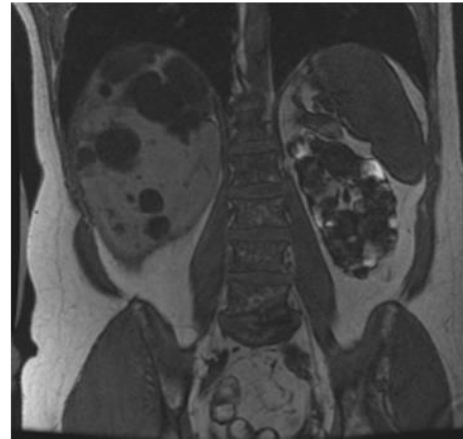

January-1992

March-1992

July-1993

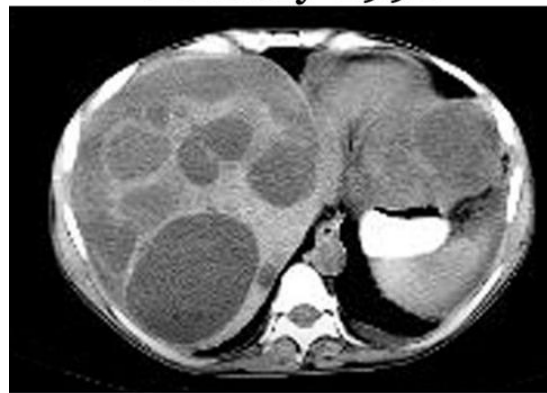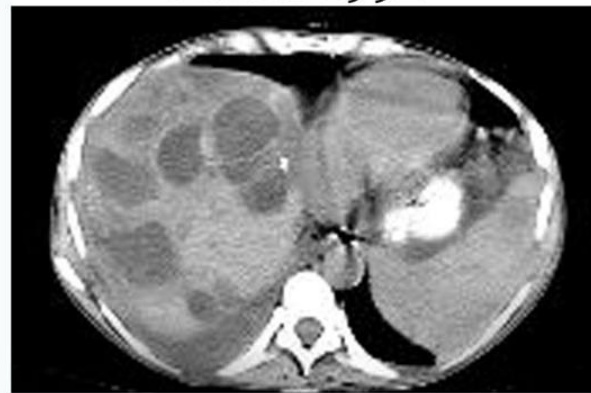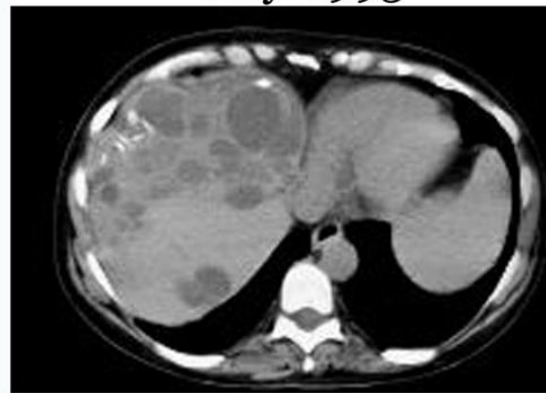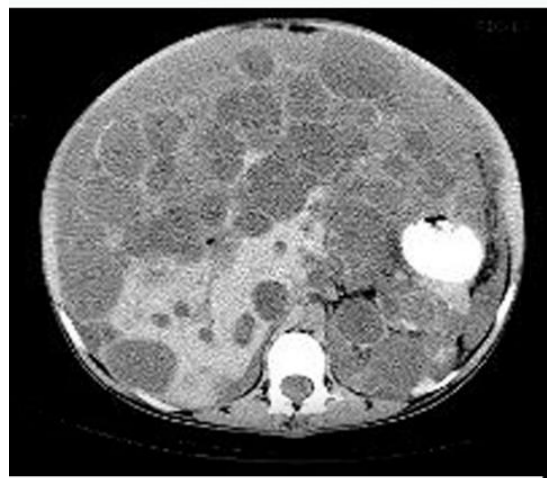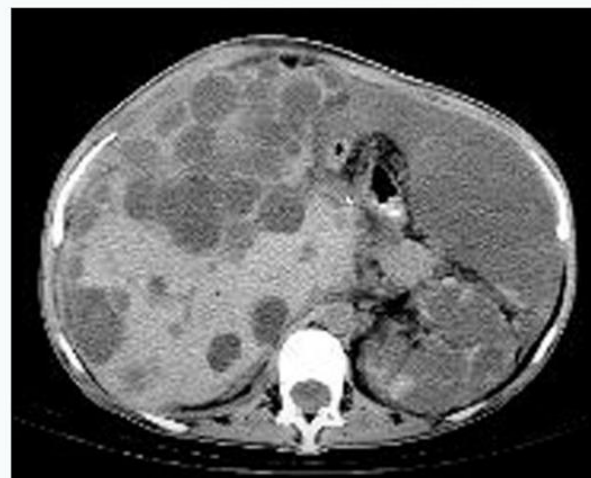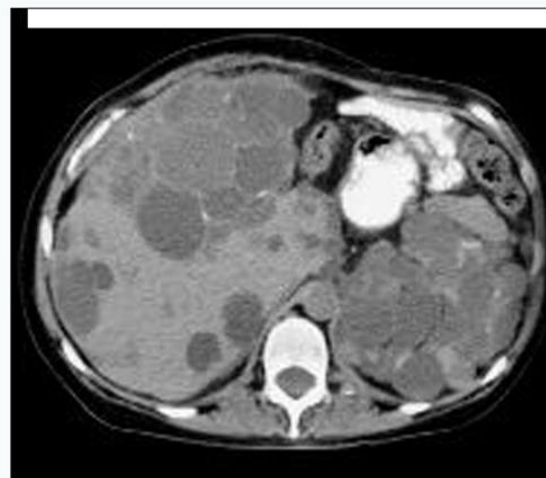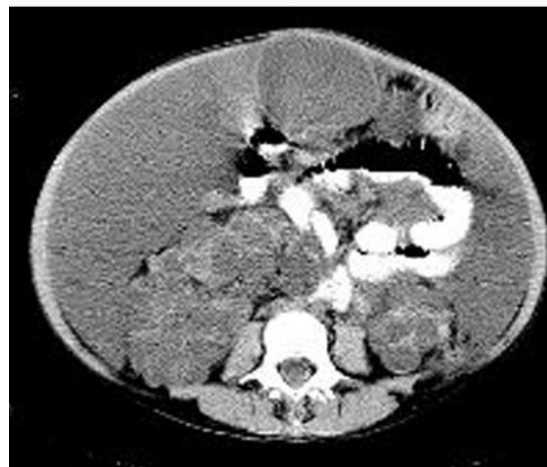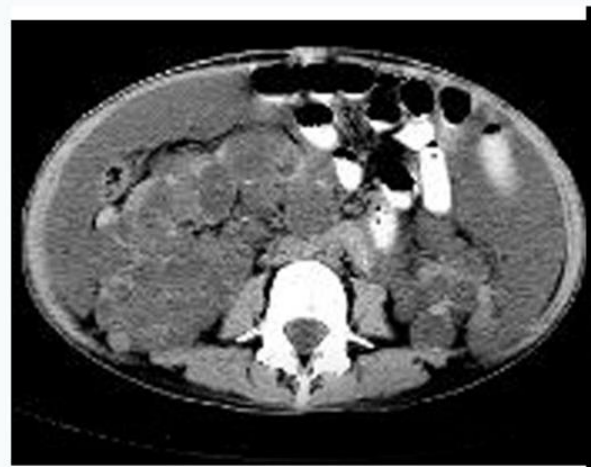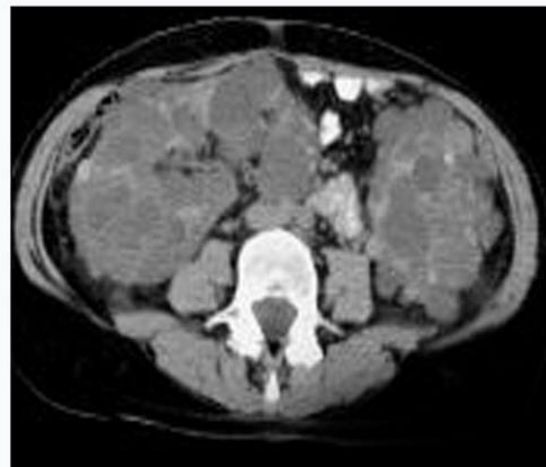

June-2009

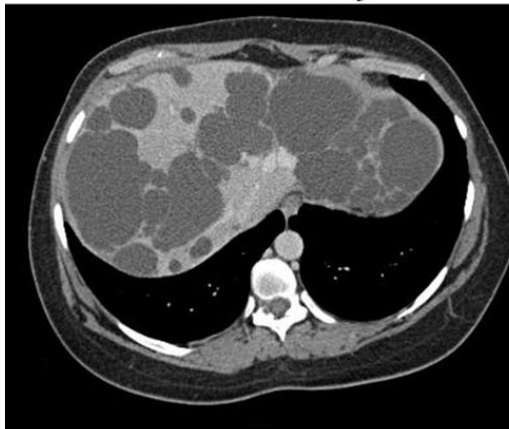

August-2009

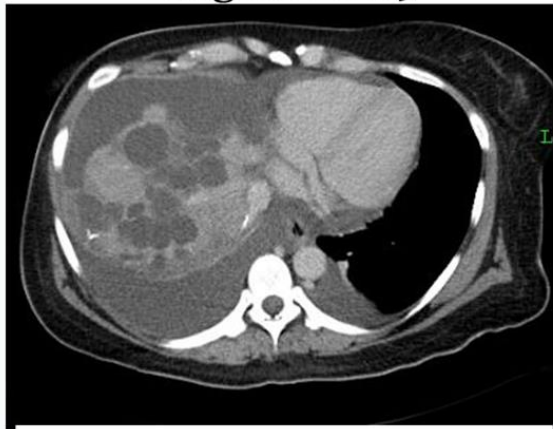

October-2011

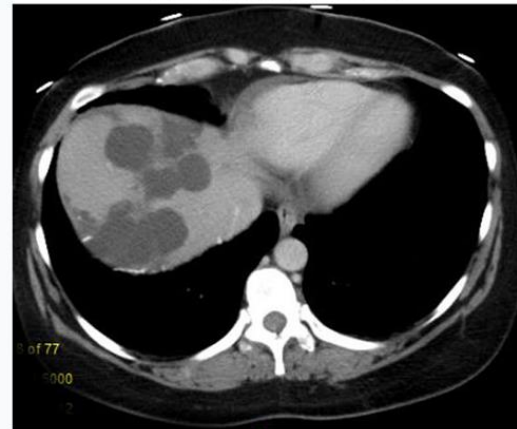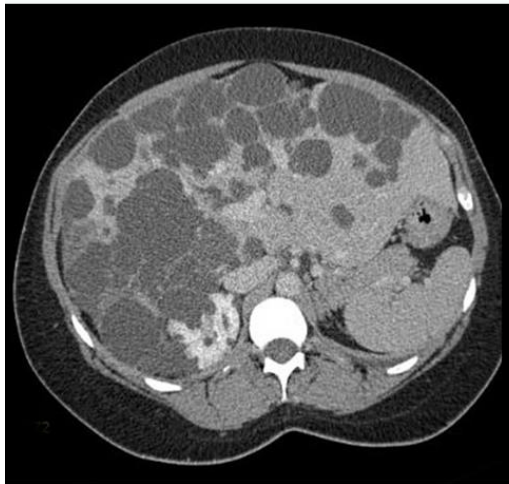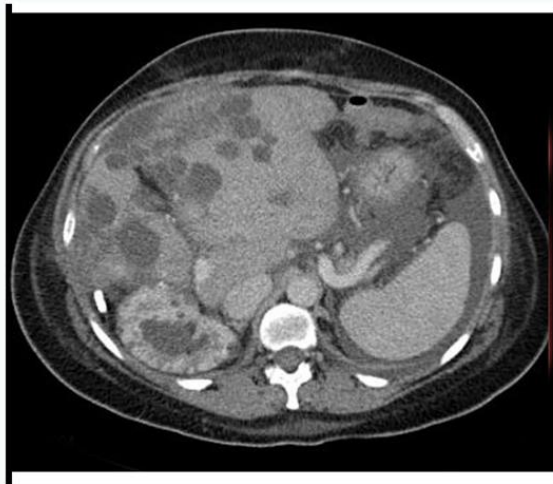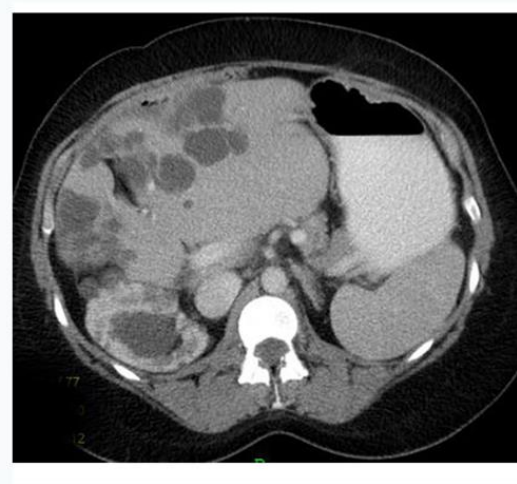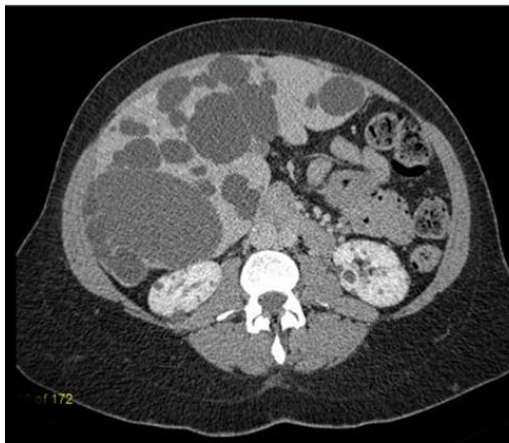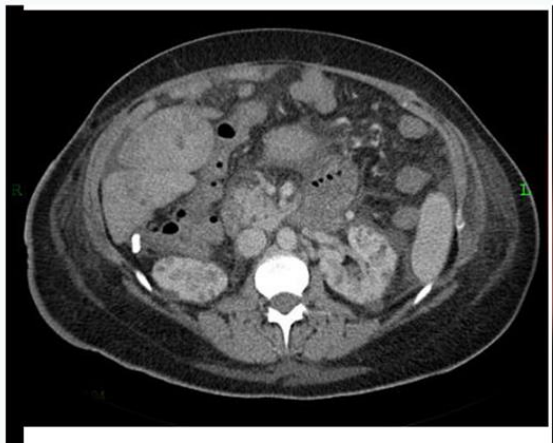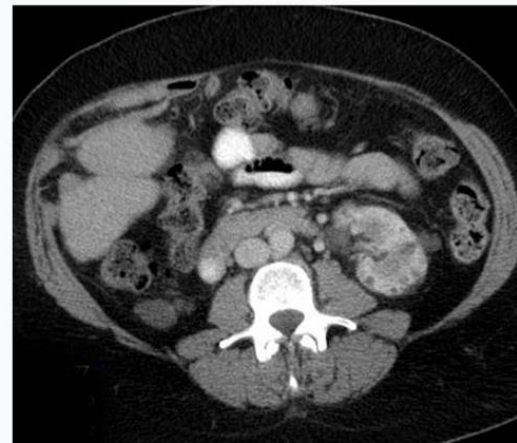

May-2011

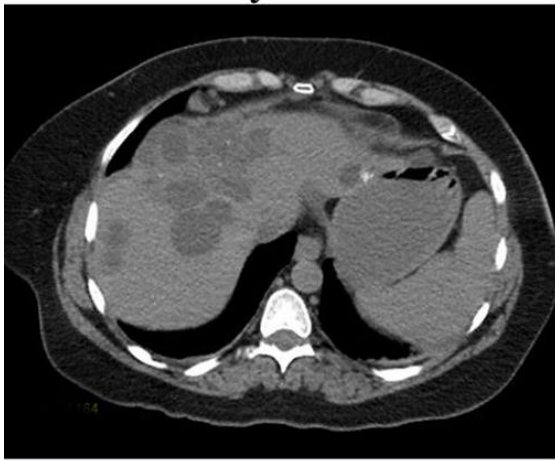

November-2011

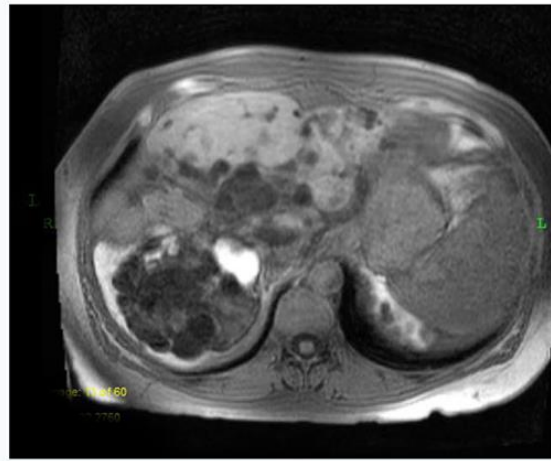

September-2012

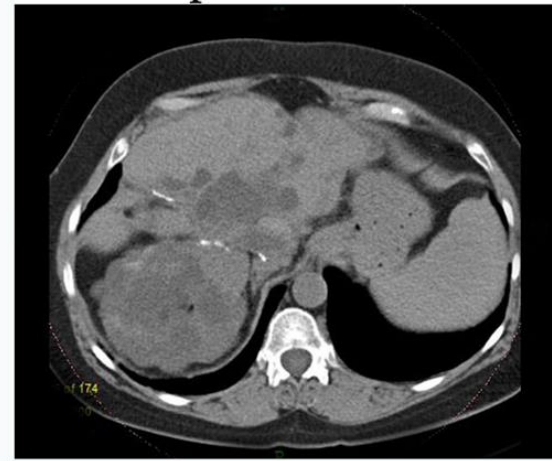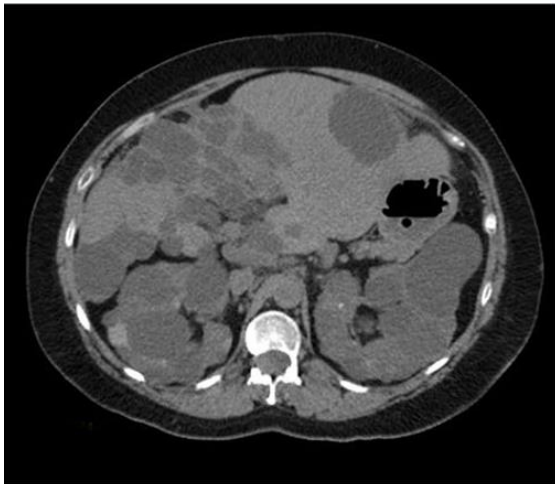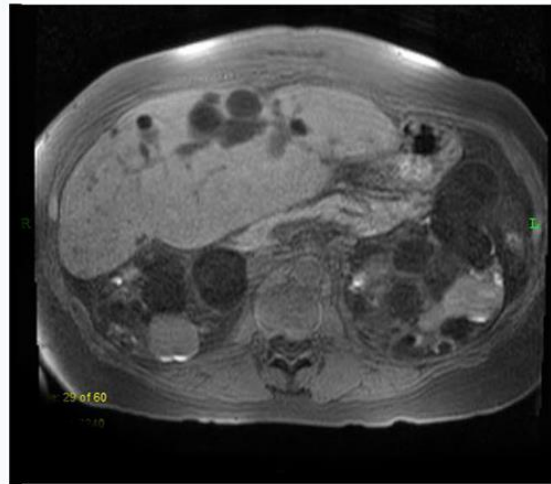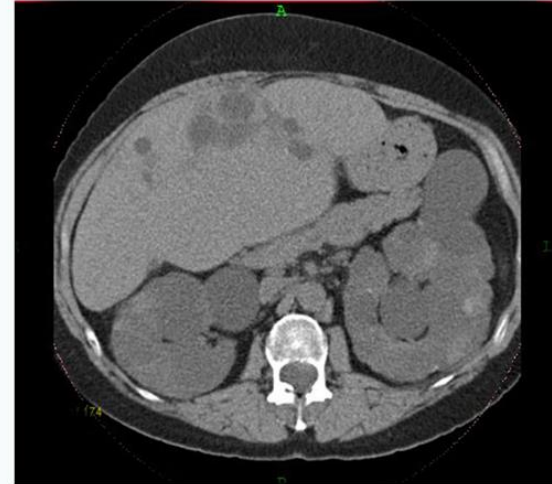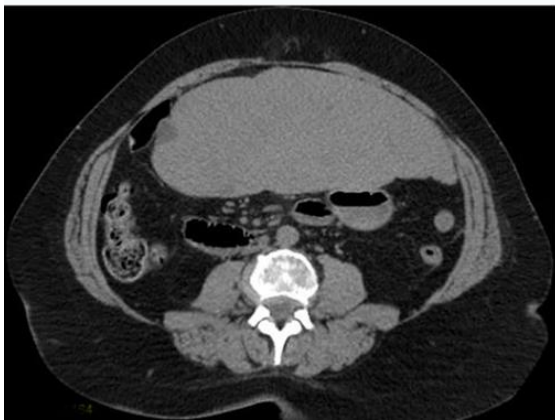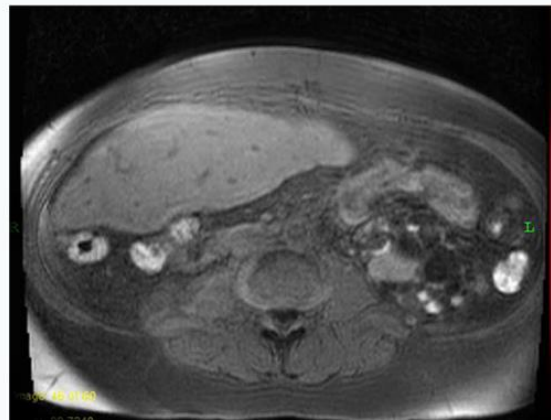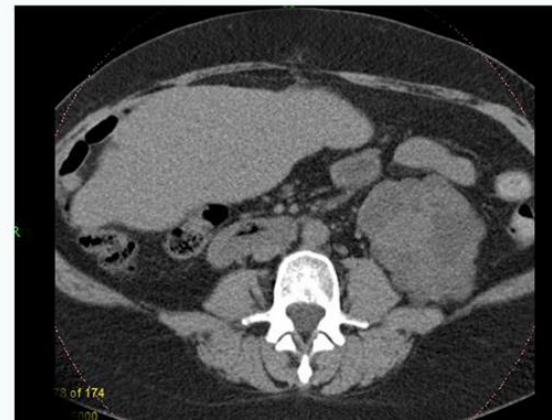



May-2012

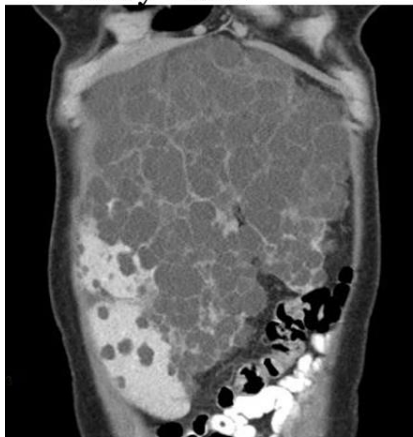

September-2012

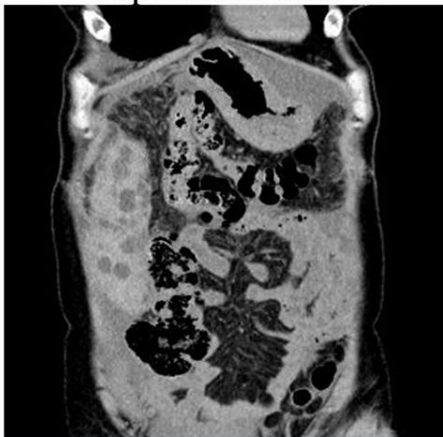

October-2013

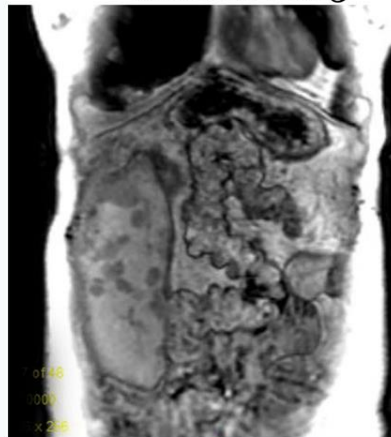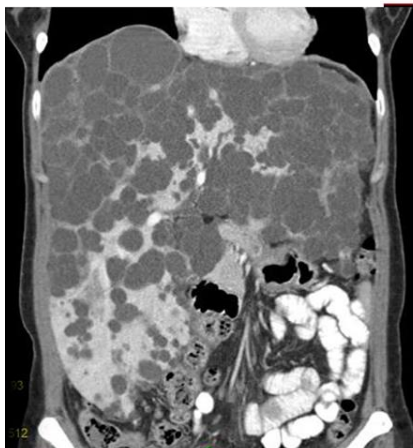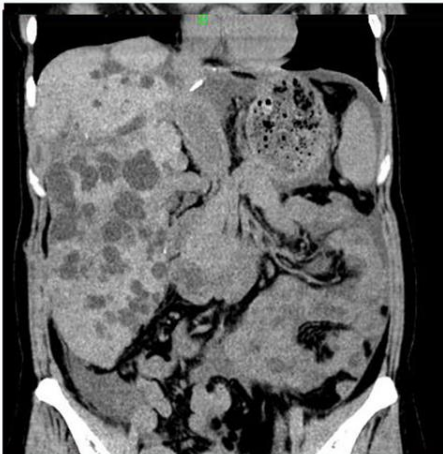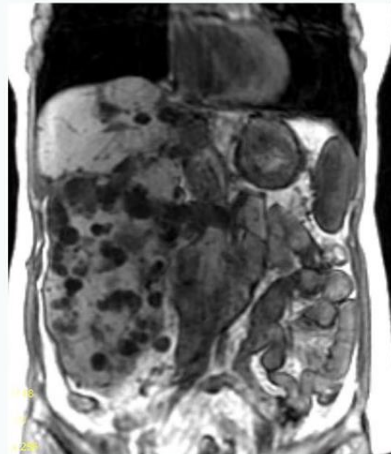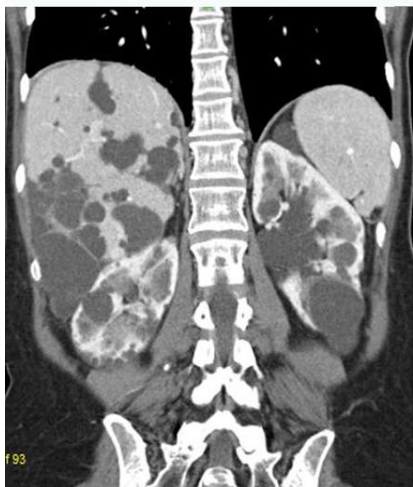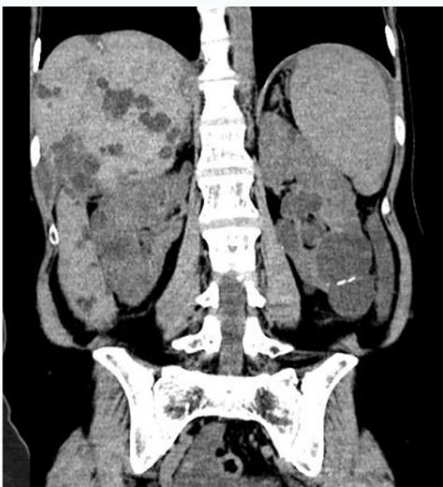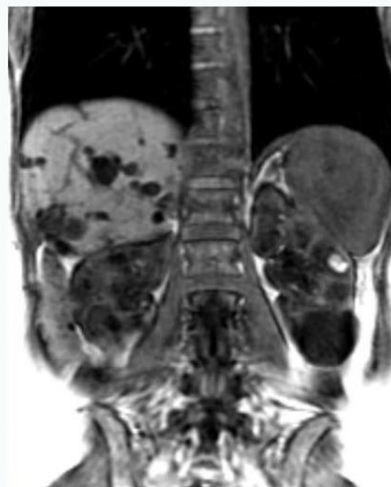

May-2011

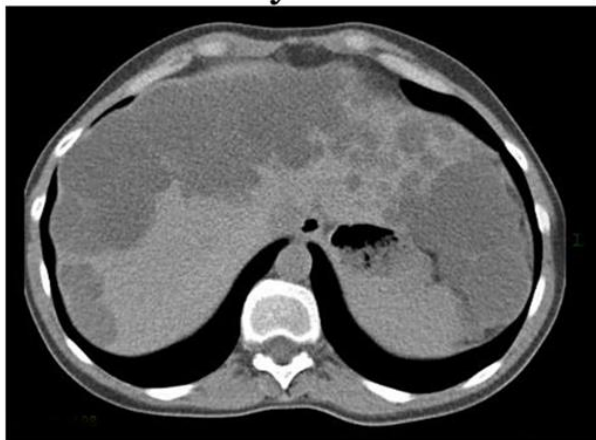

June-2011

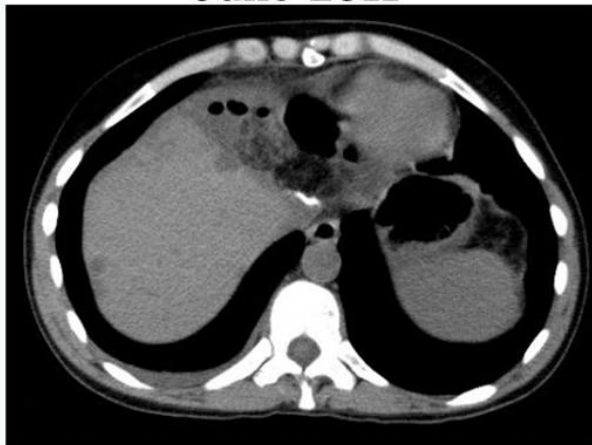

April 2013

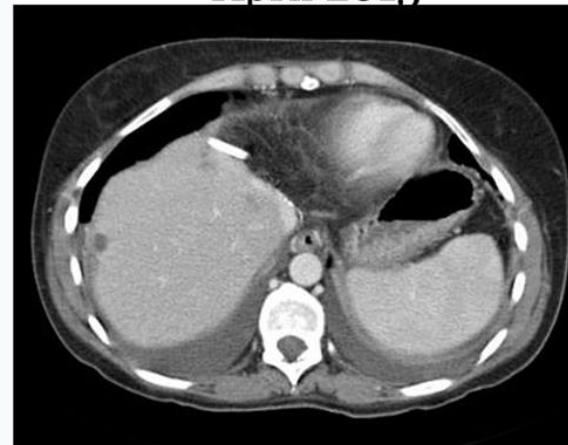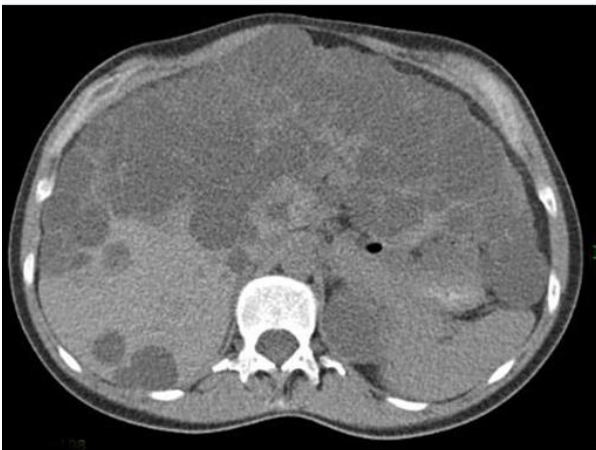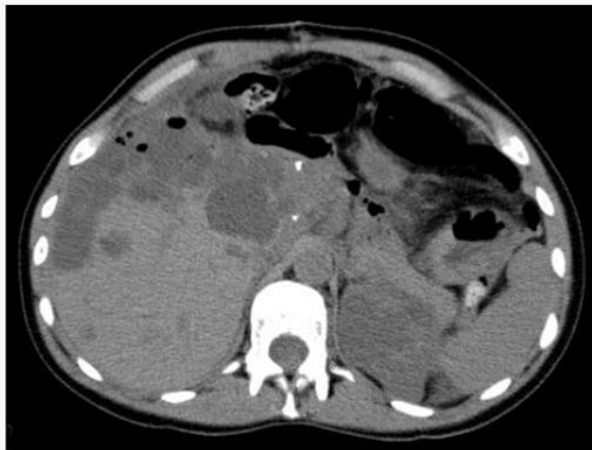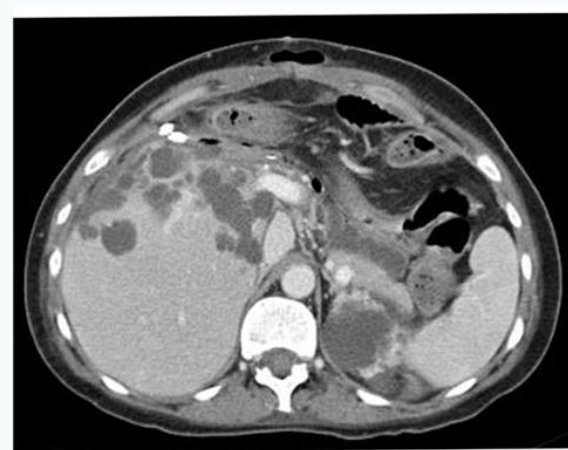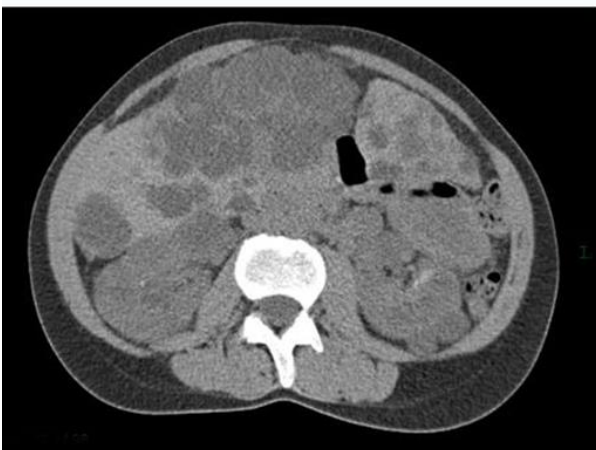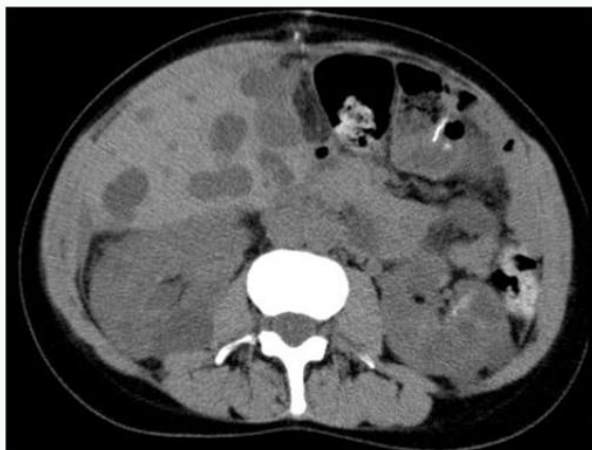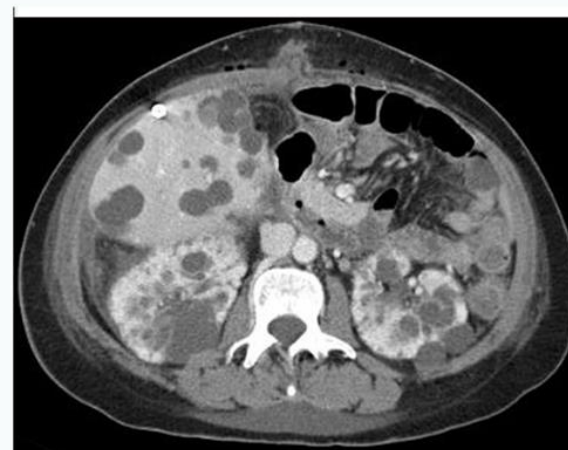

March-2011

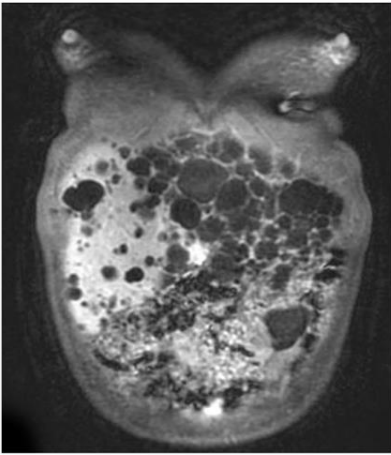

November-2011

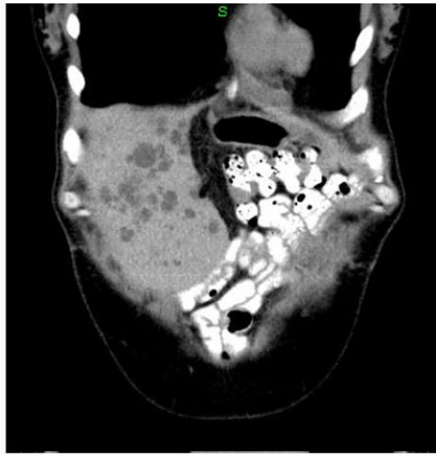

May-2014

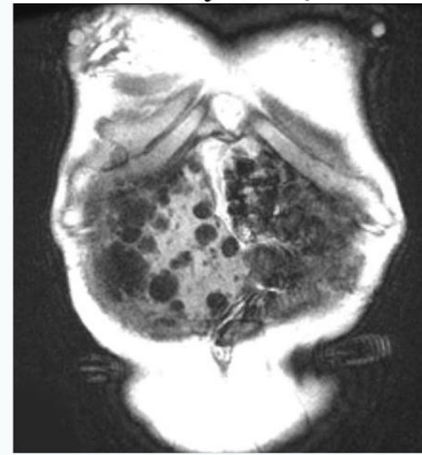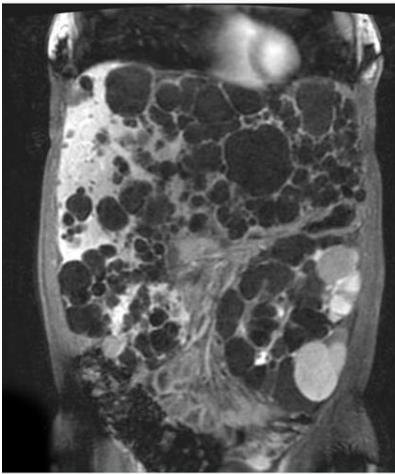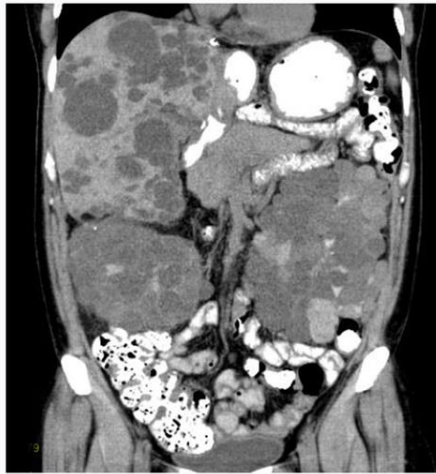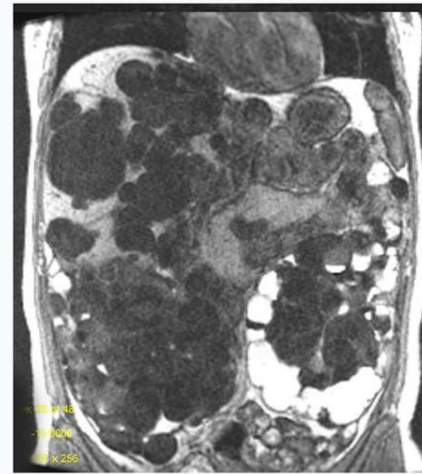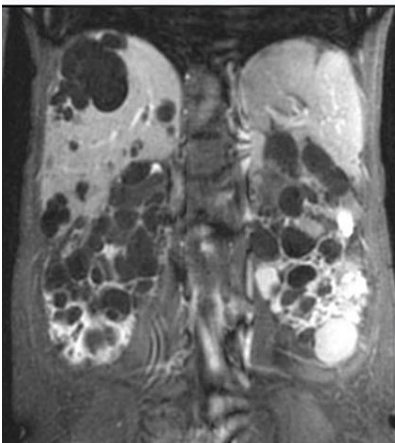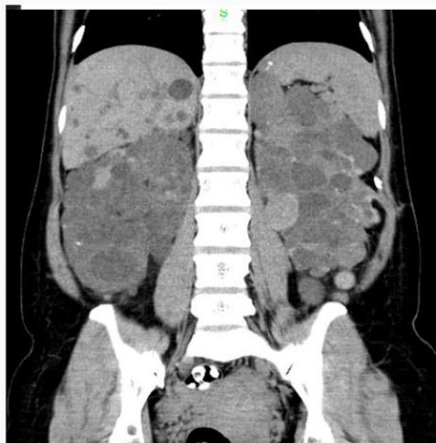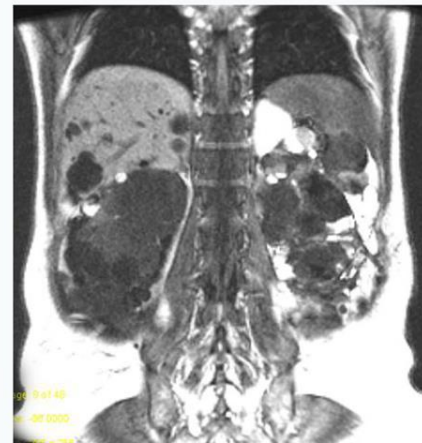

November-2011

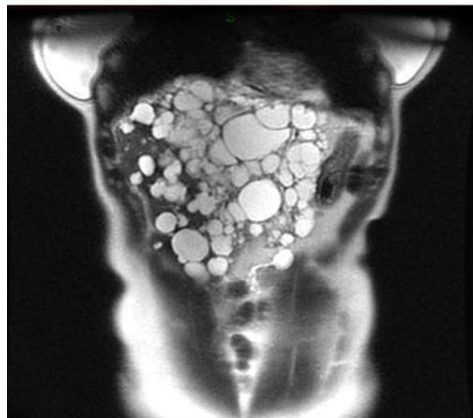

December-2011

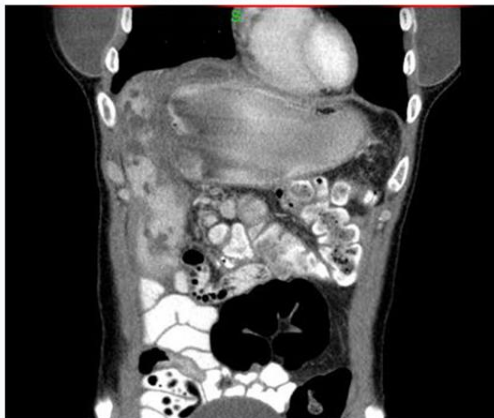

December-2012

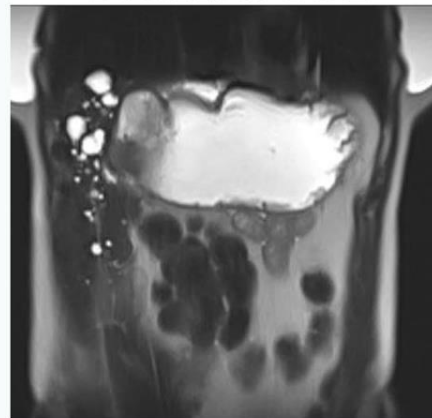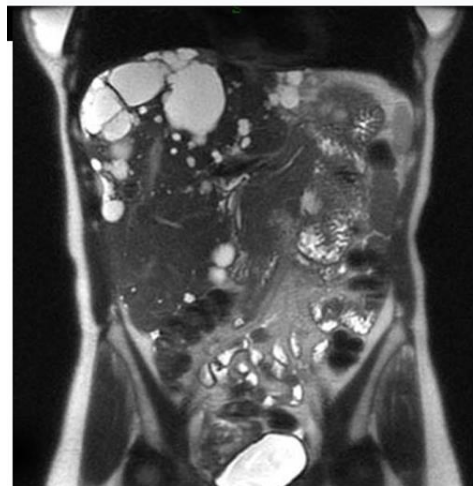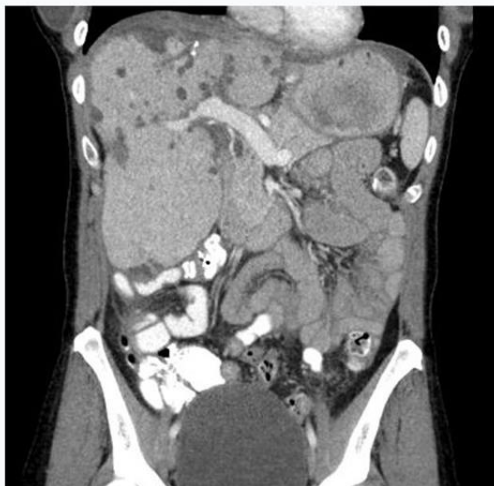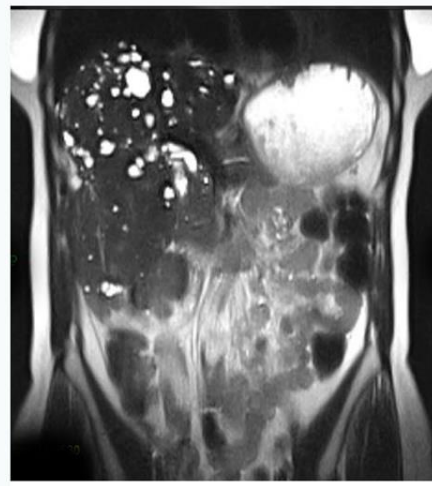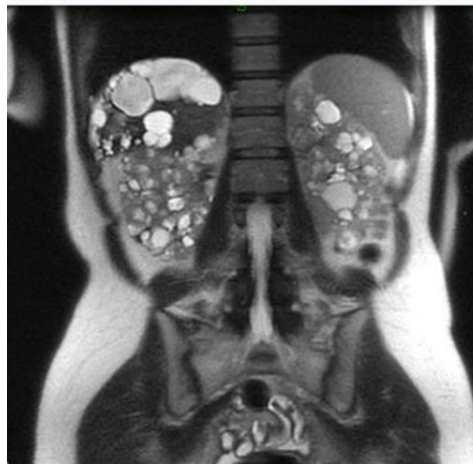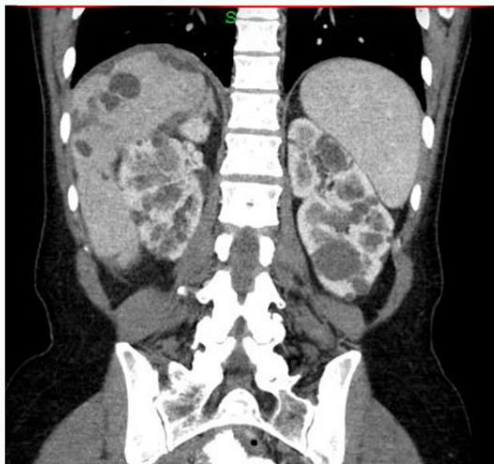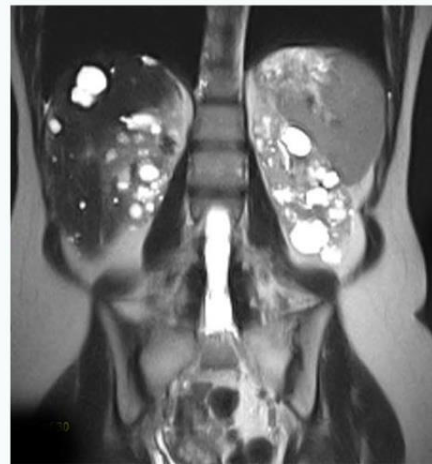

January-2011

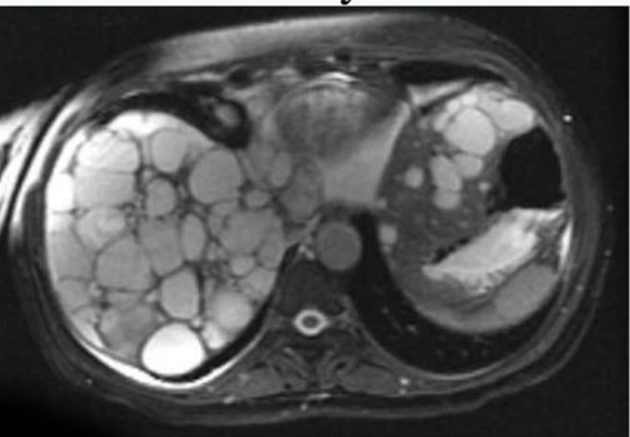

May-2011

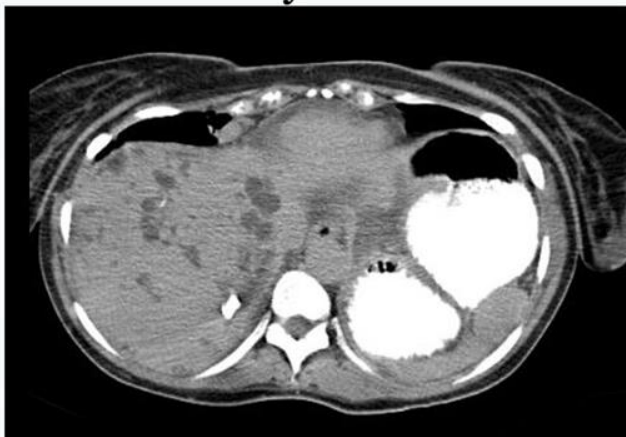

August-2012

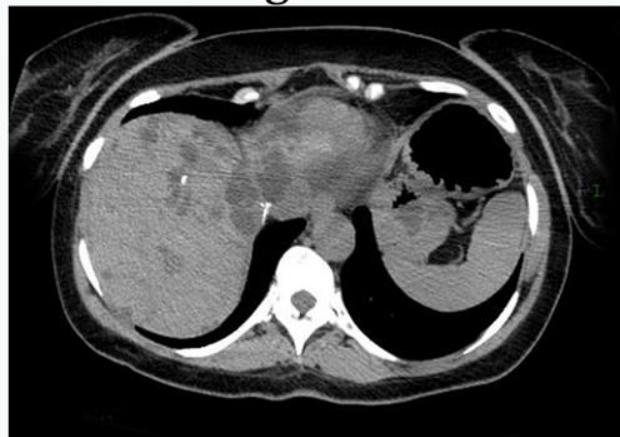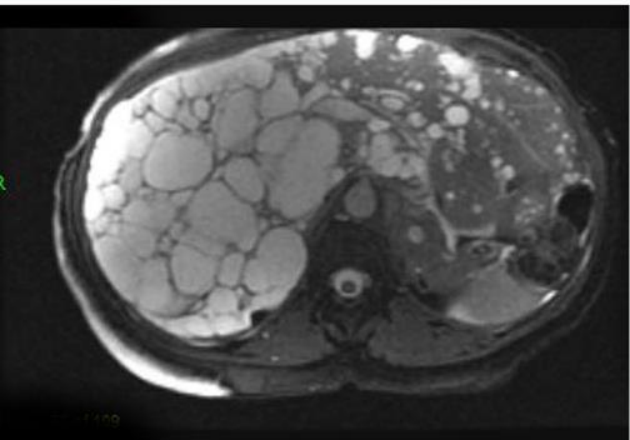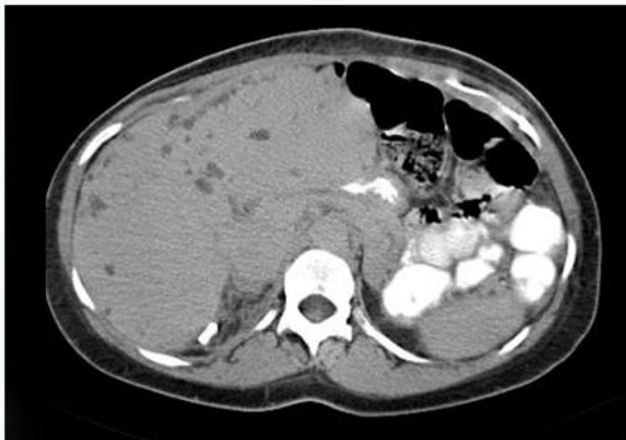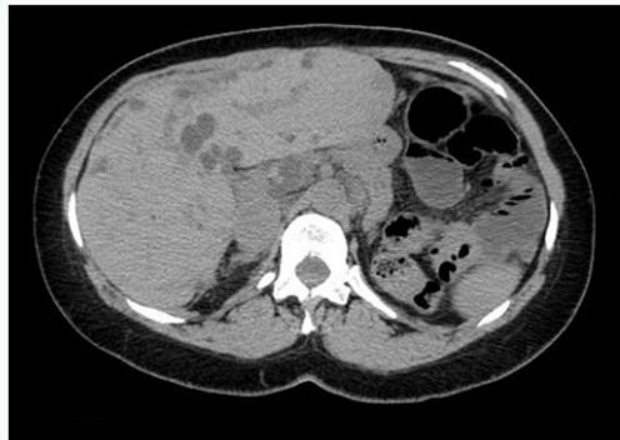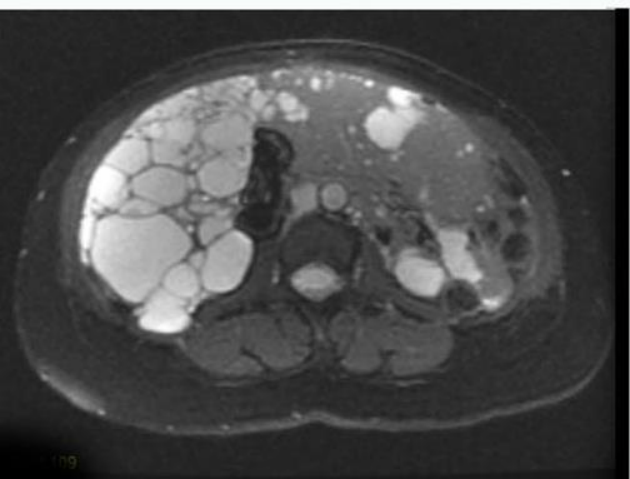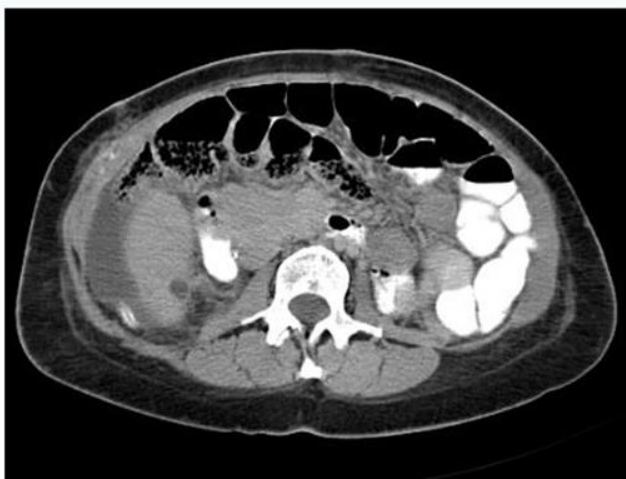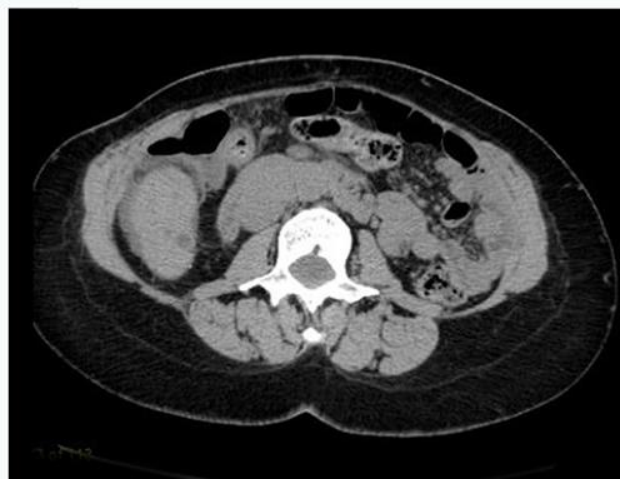

June-2010

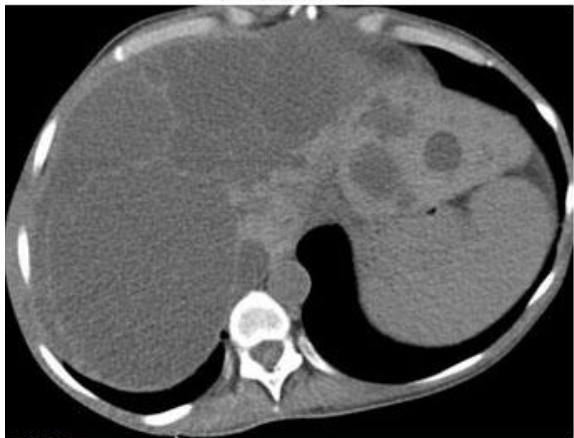

July-2010

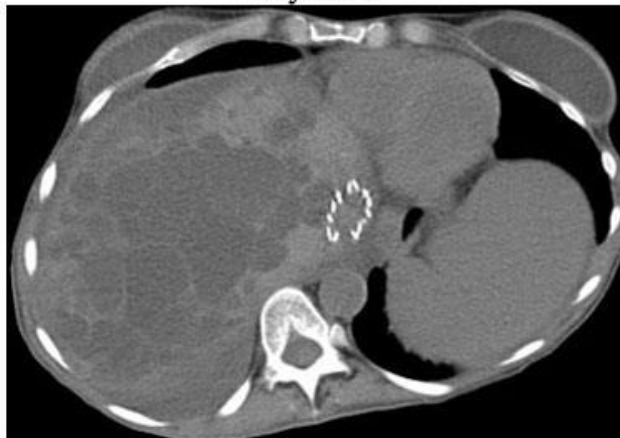

June-2013

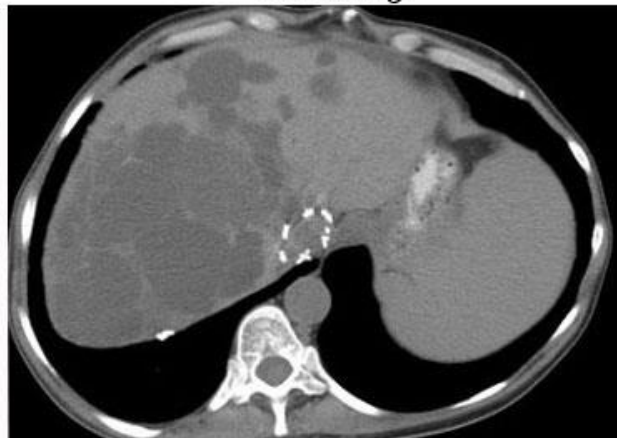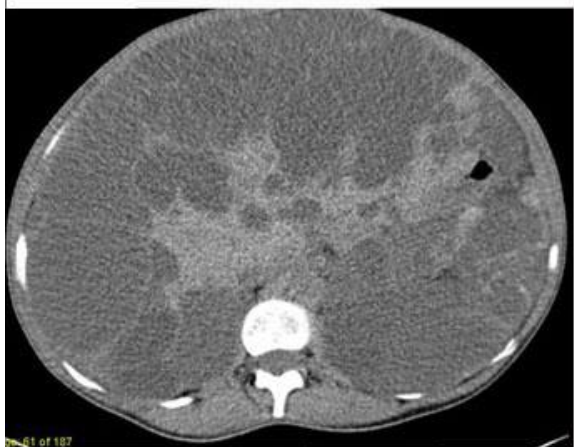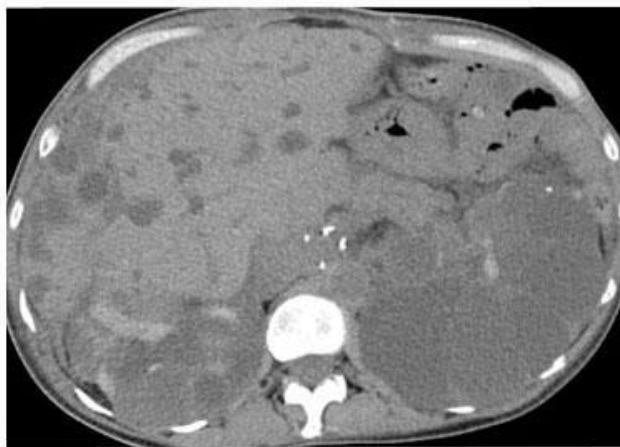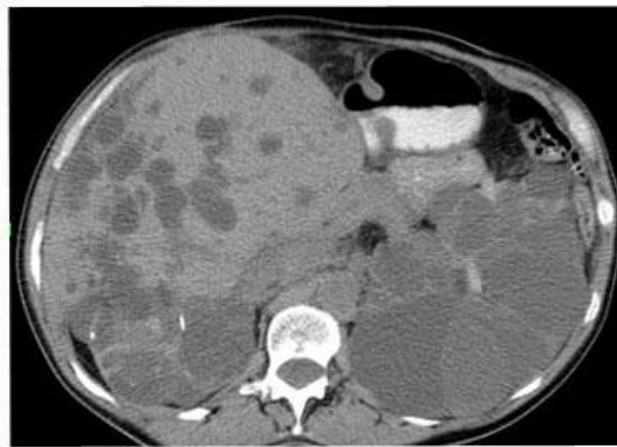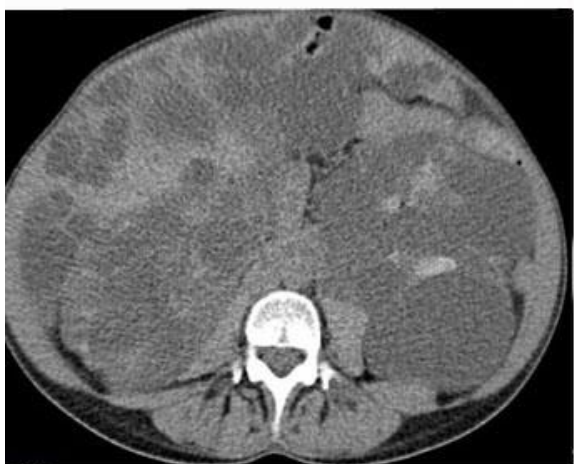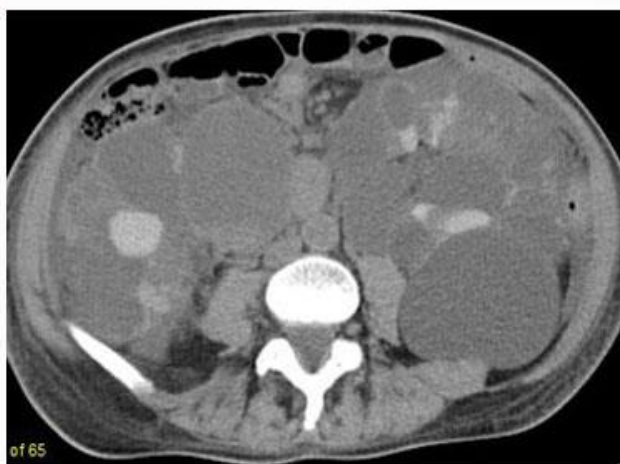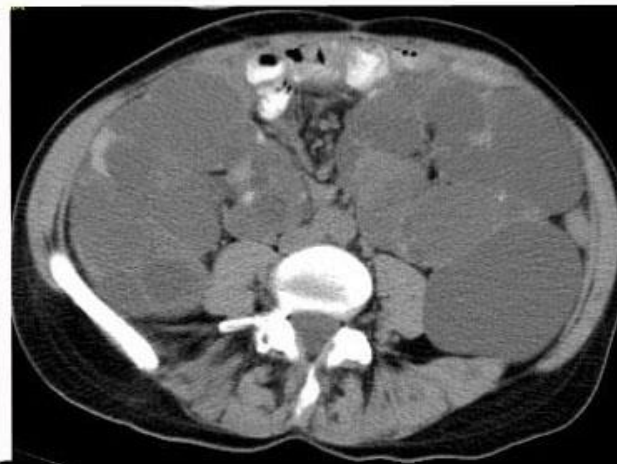

October-2009

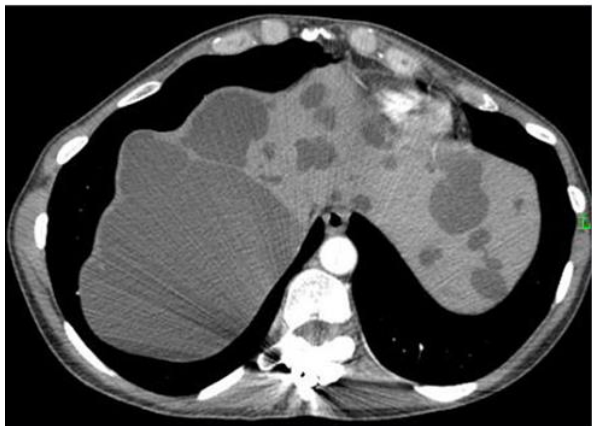

September-2010

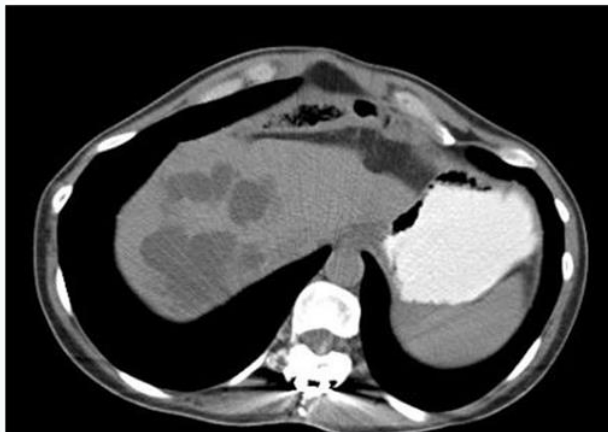

March-2014

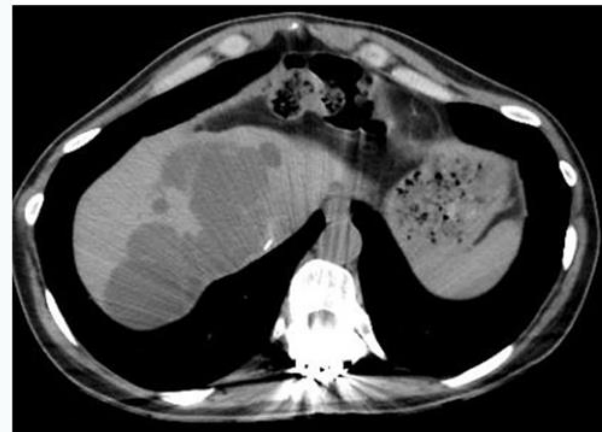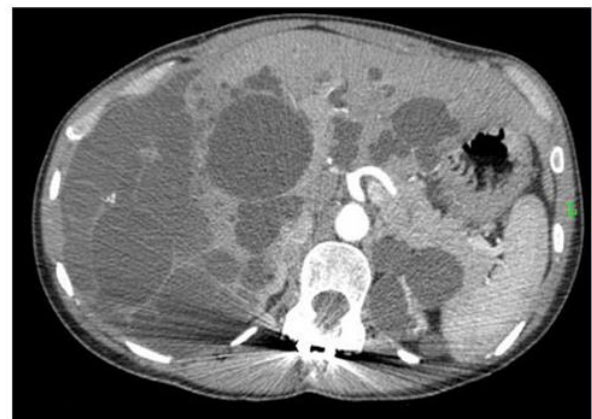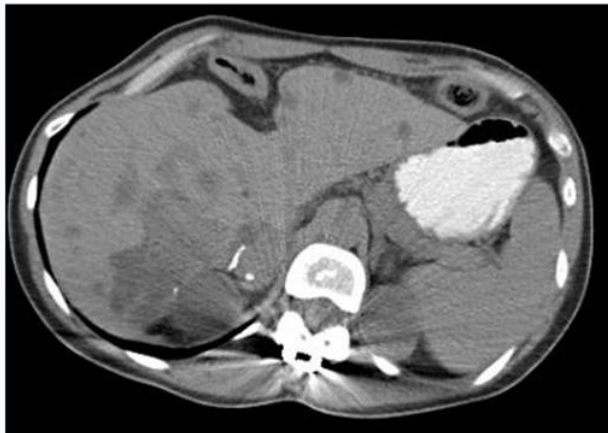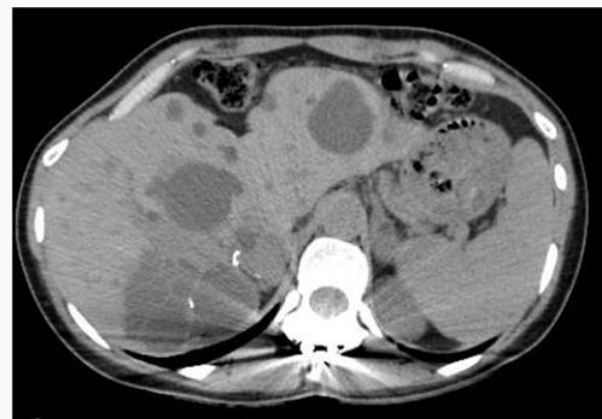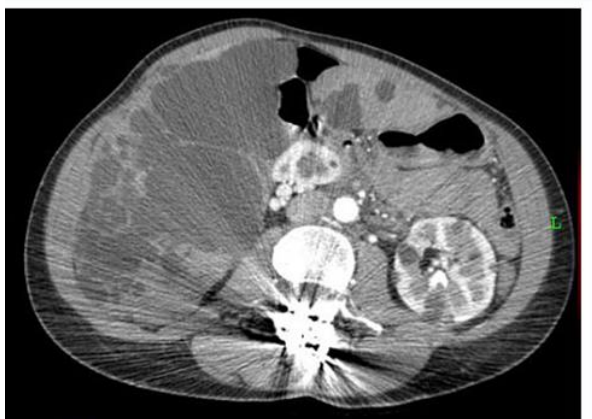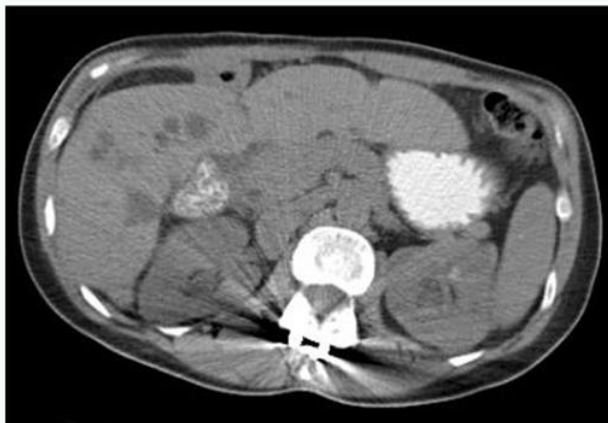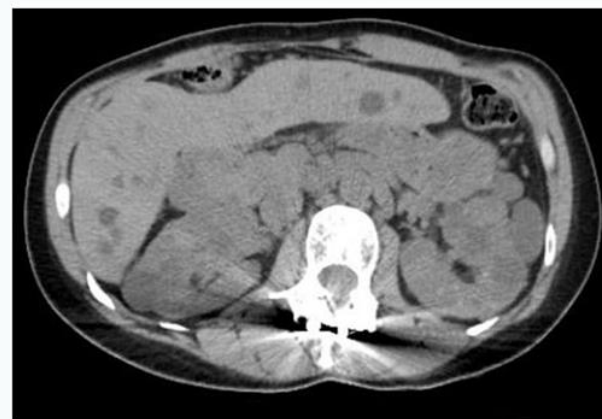

March-2009

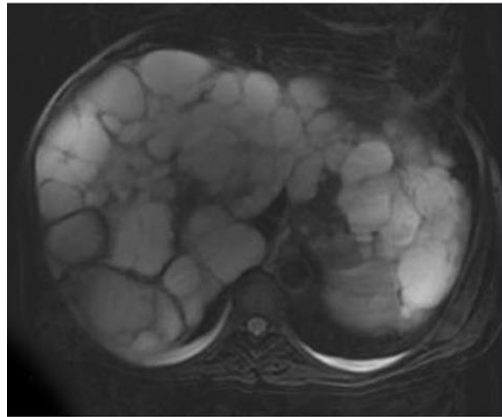

July-2009

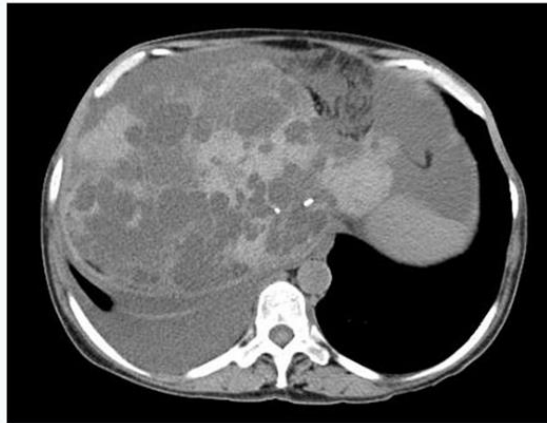

May-2012

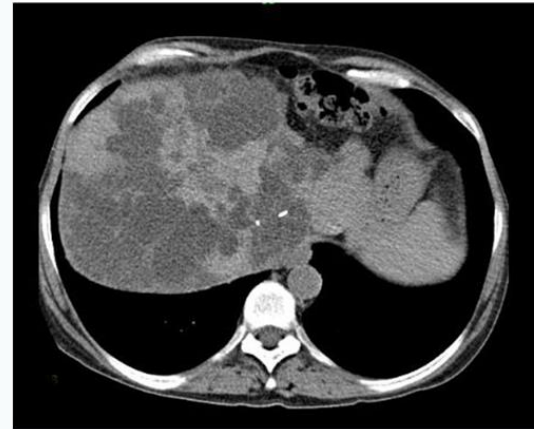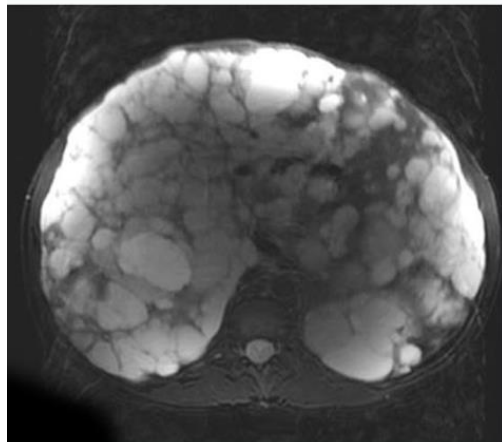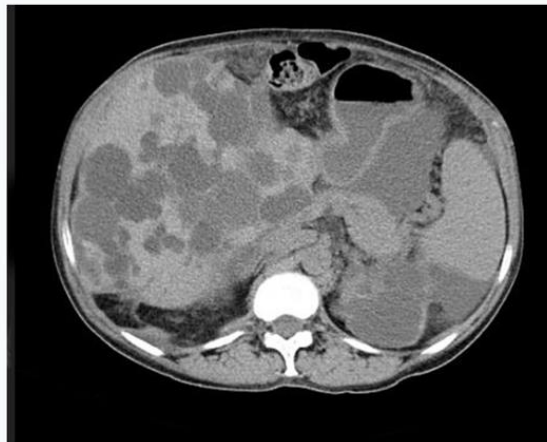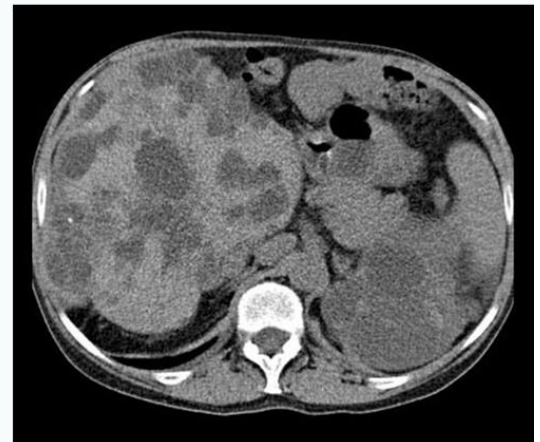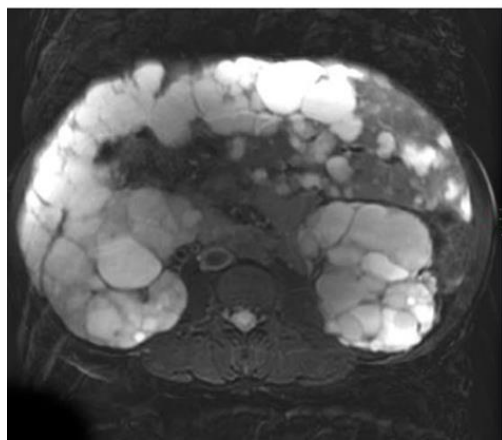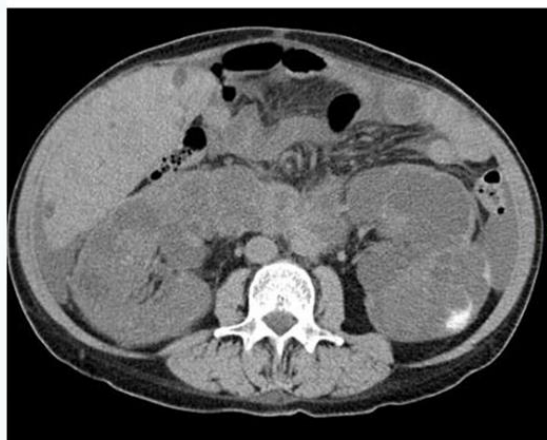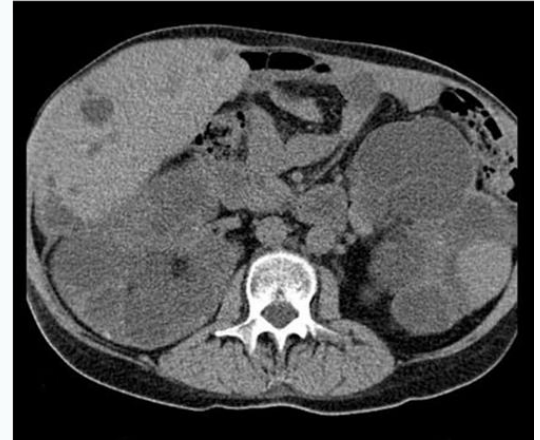



May-1993

April-1994

September-2013

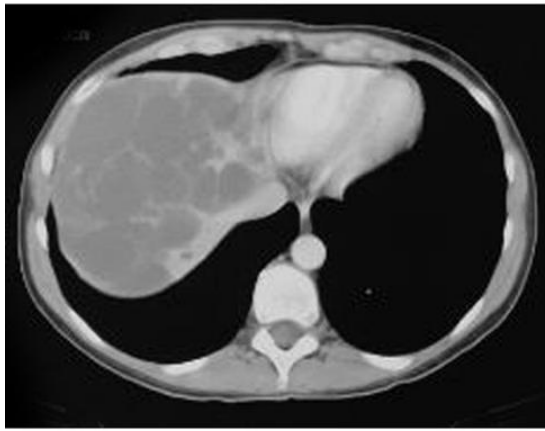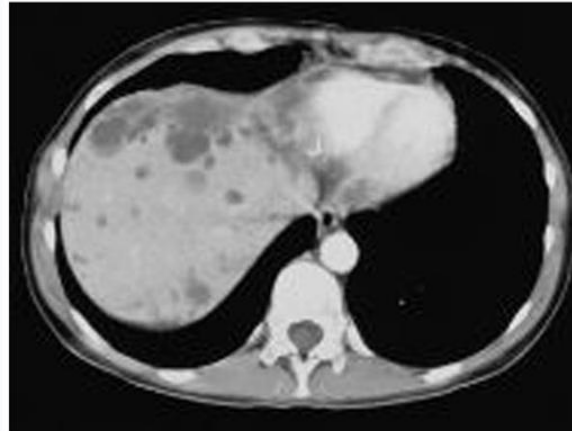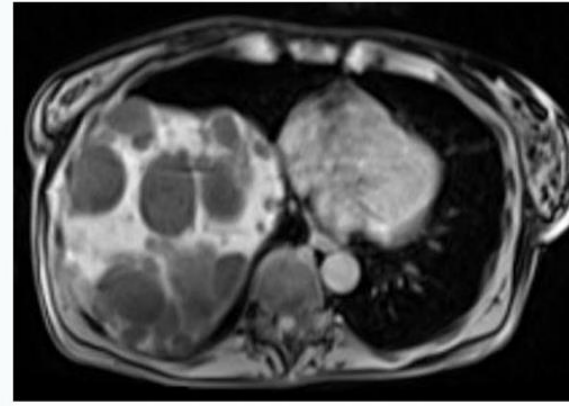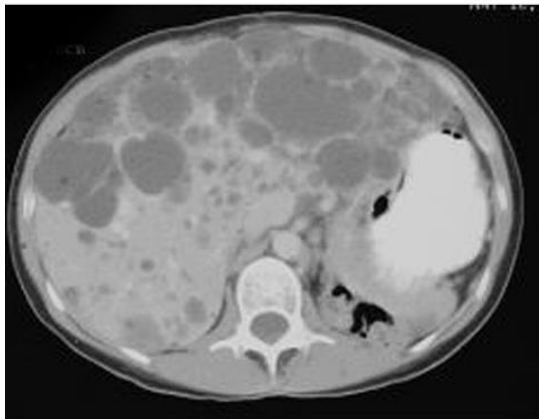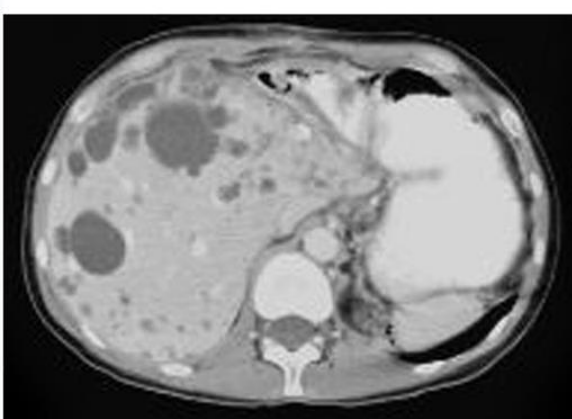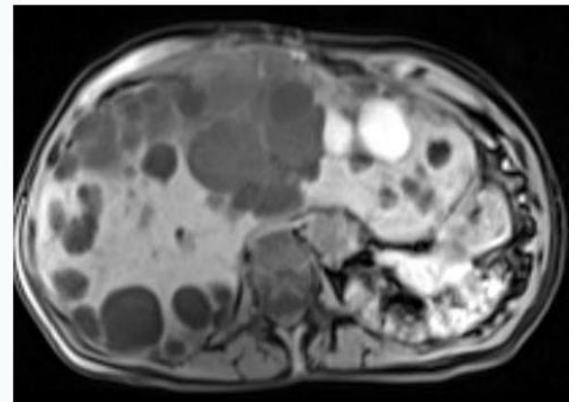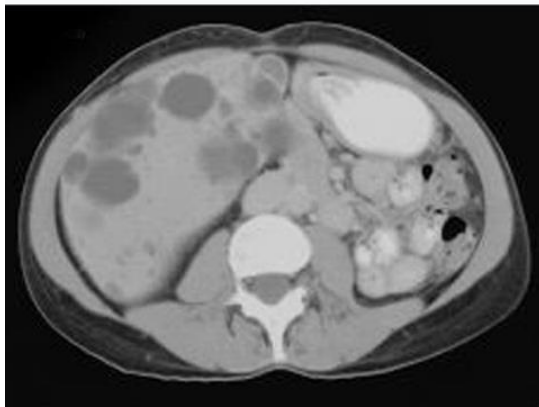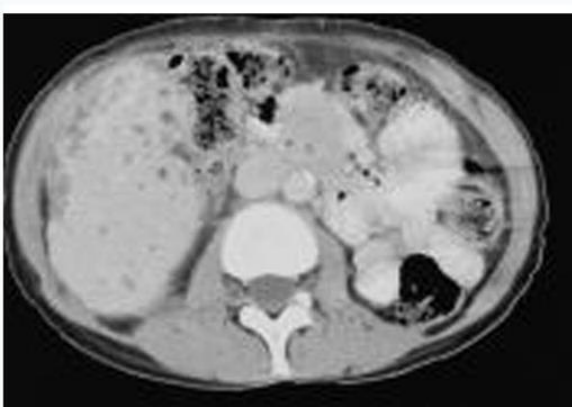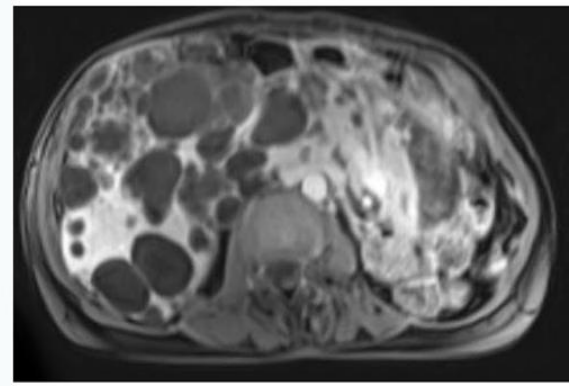

October-2007

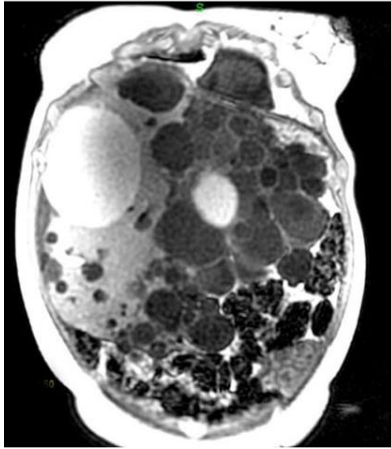

November-2007

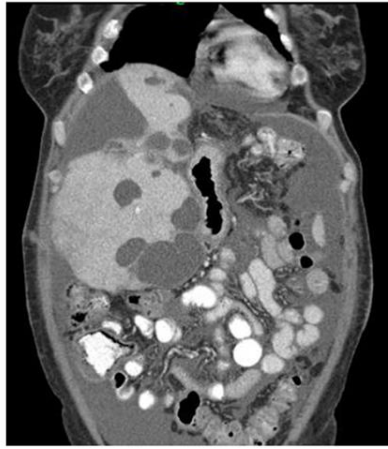

June-2014

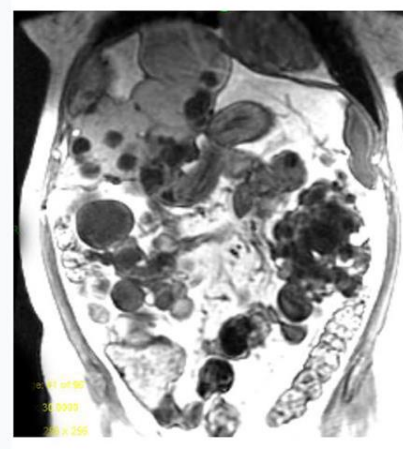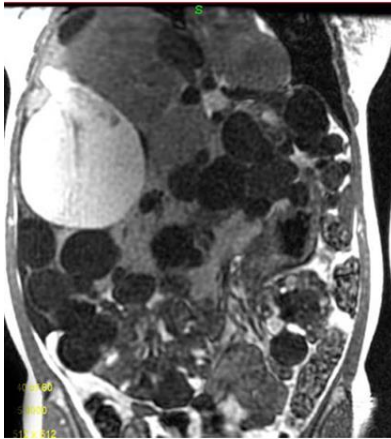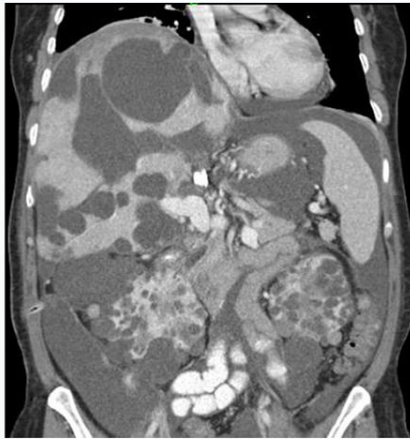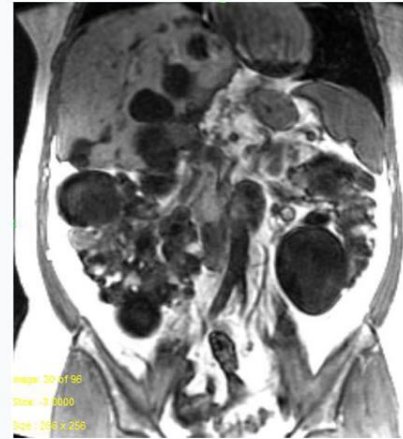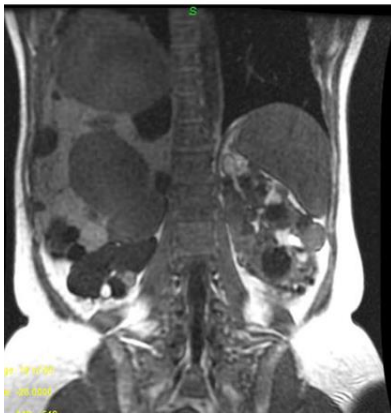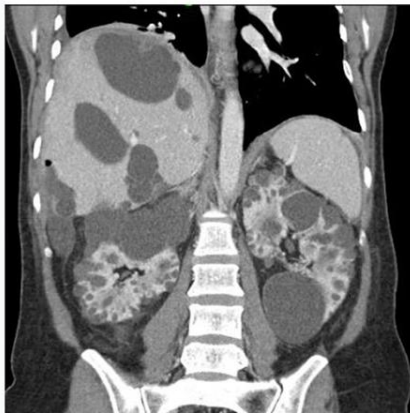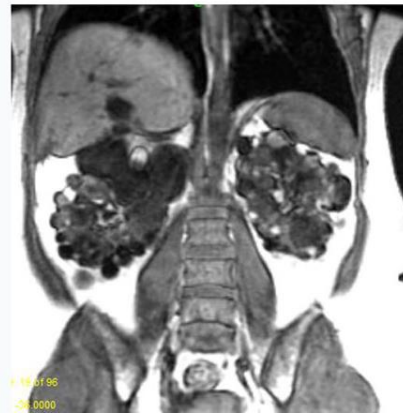

October-2008

January-2009

November-2009

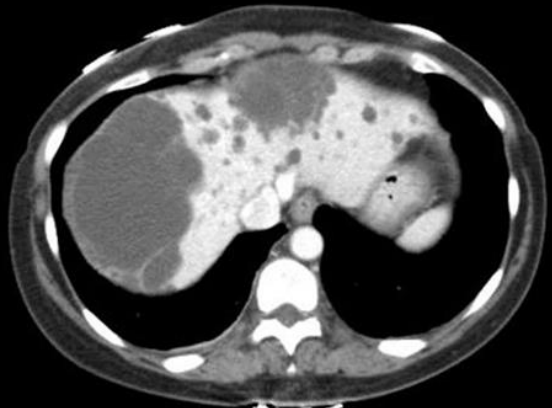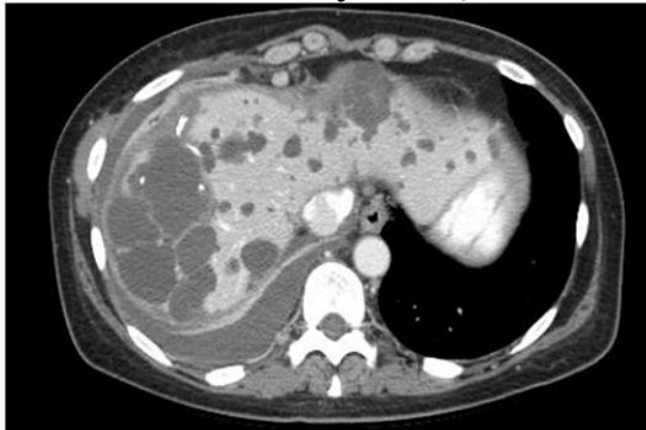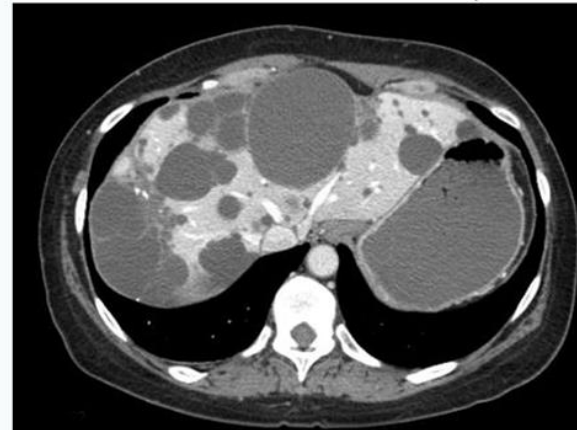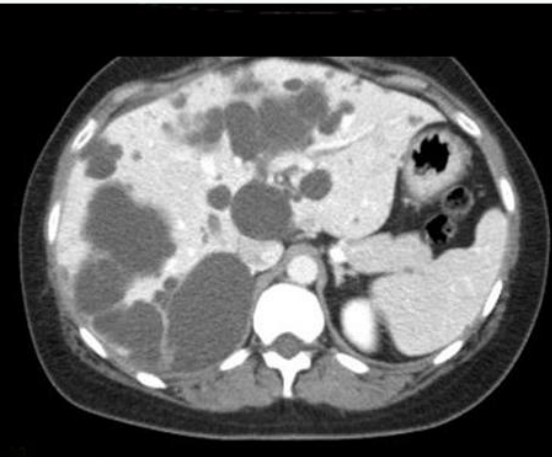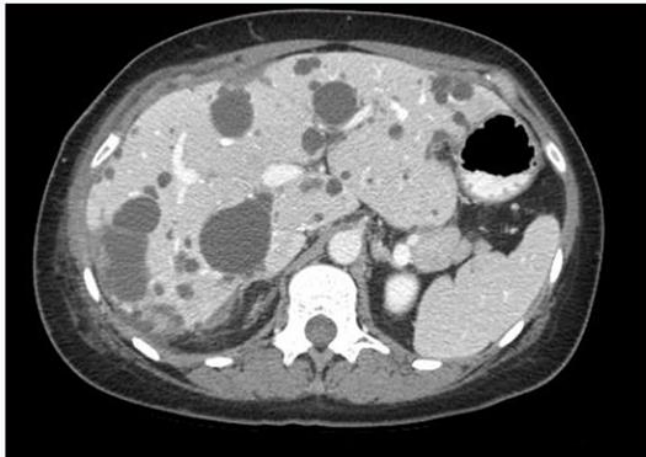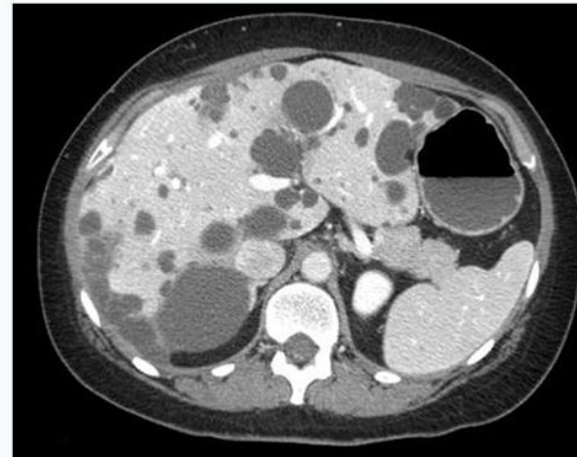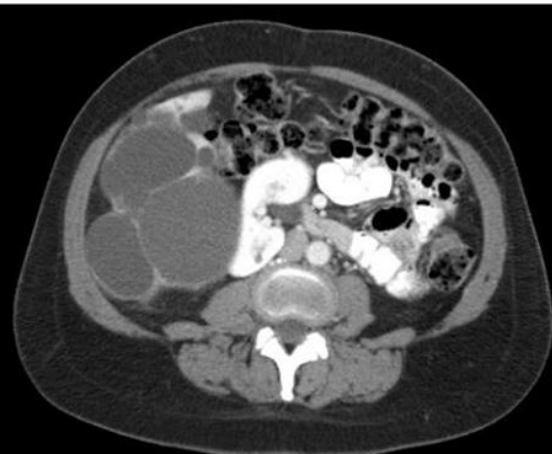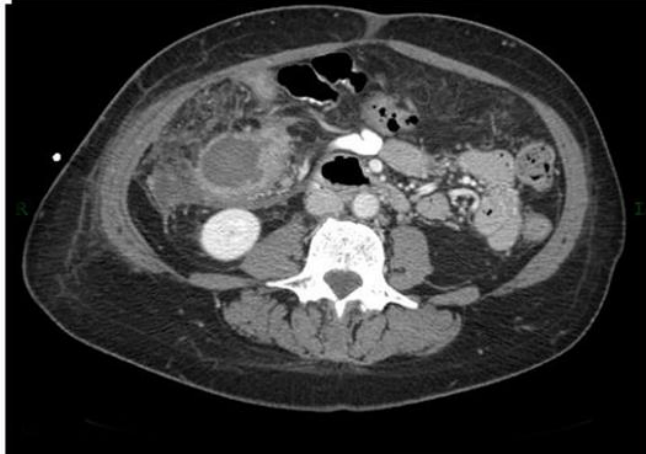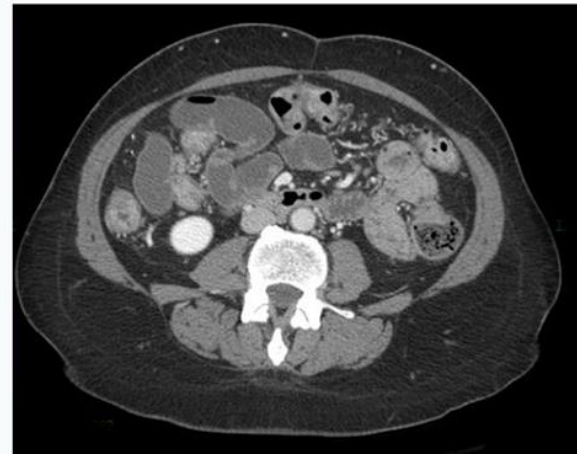

September-2008

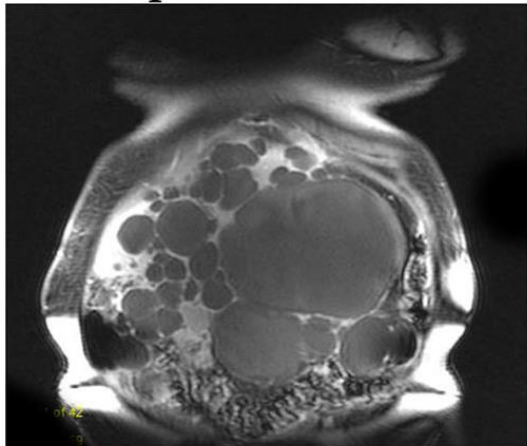

January-2009

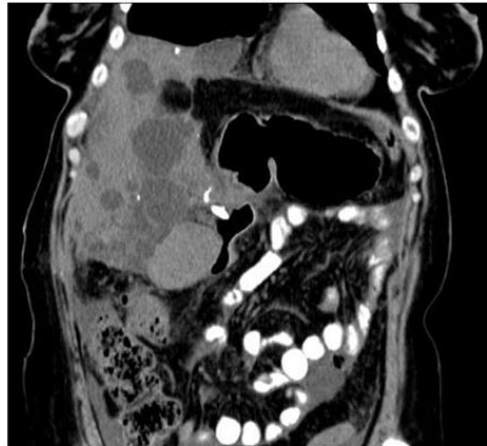

April-2014

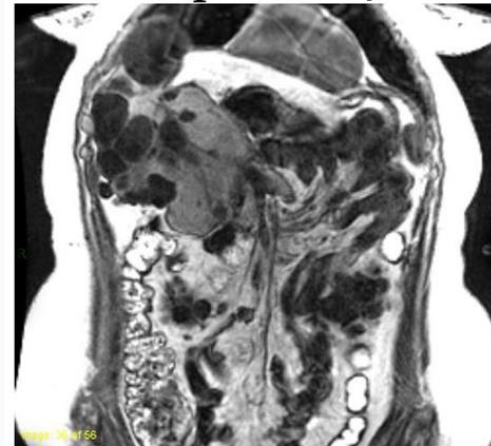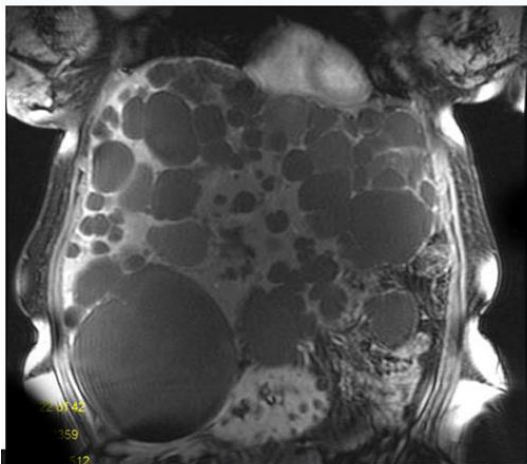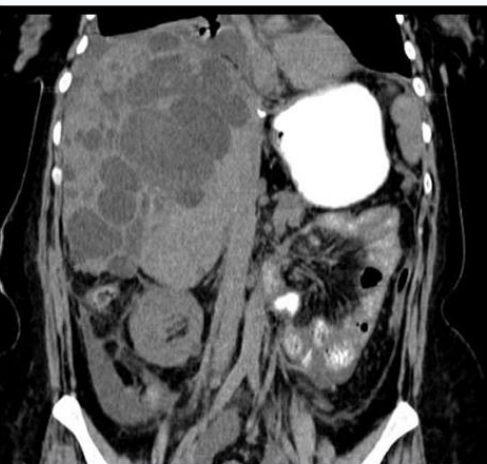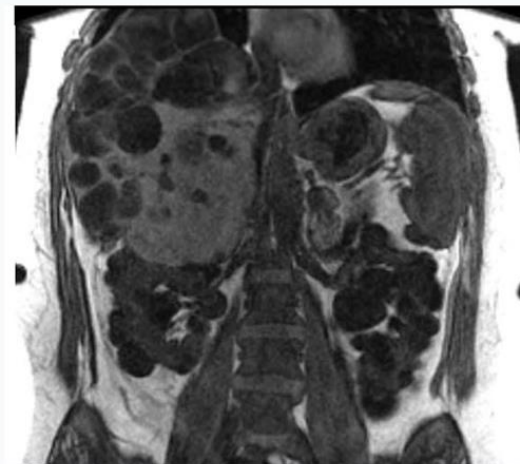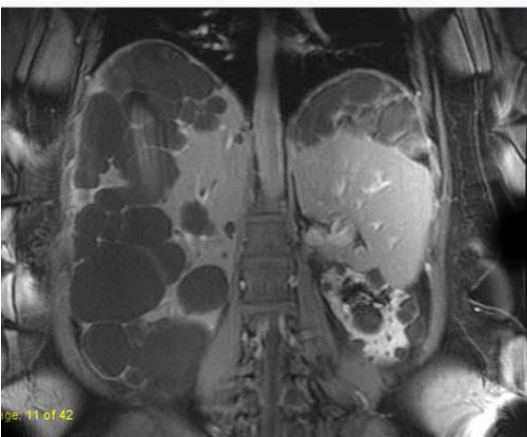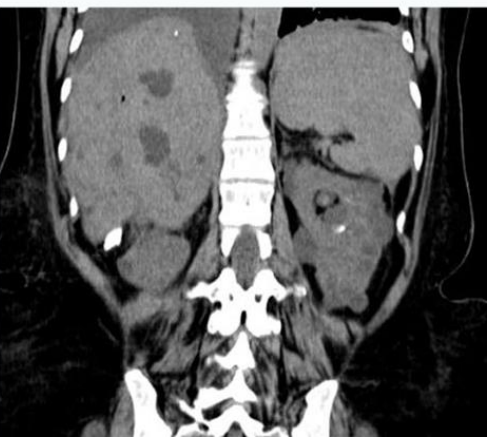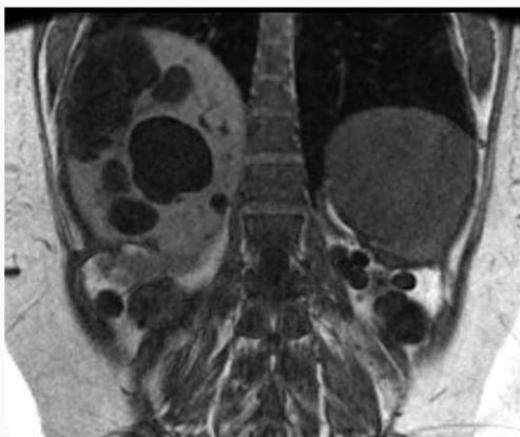

September-2008

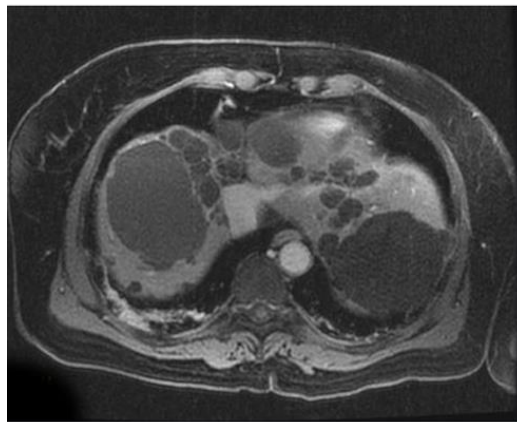

March-2009

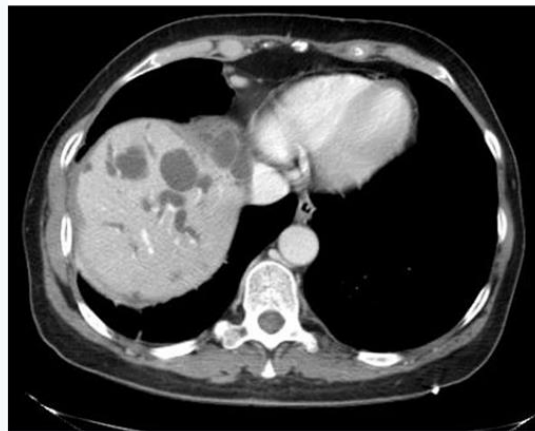

November-2011

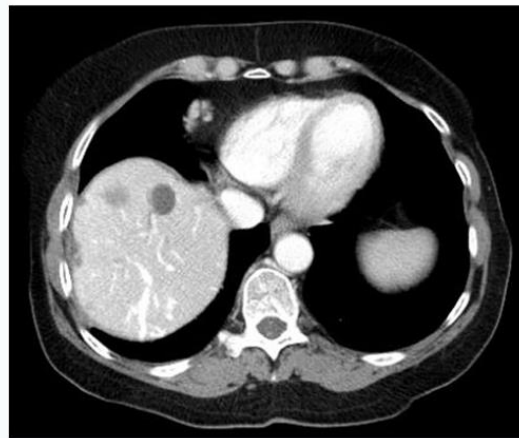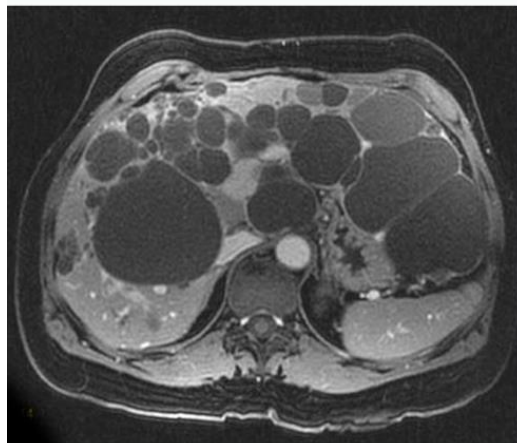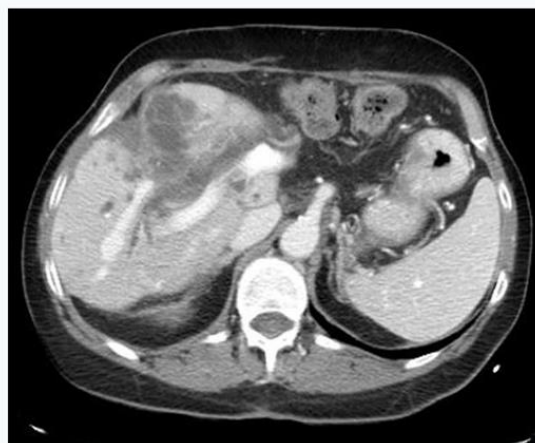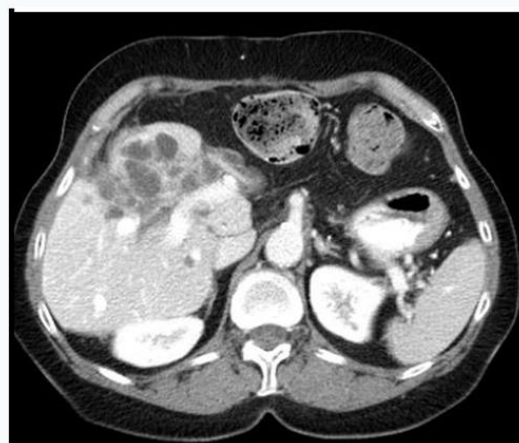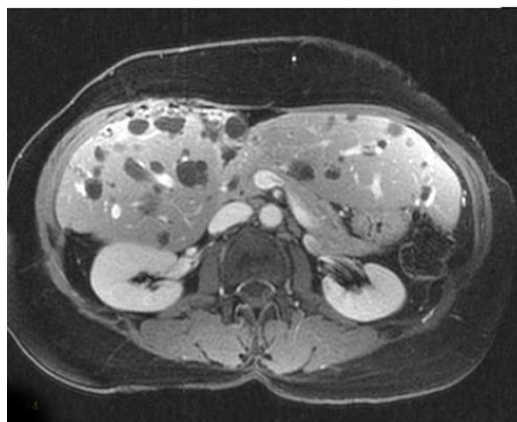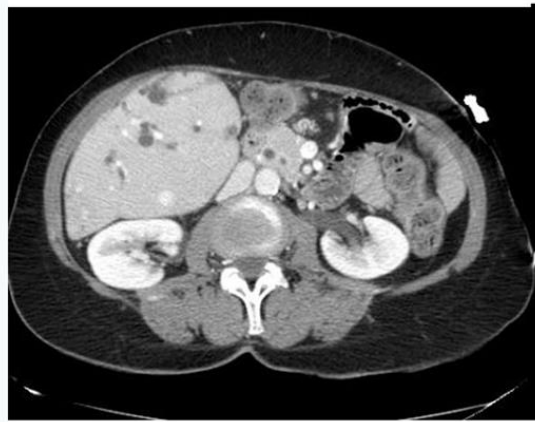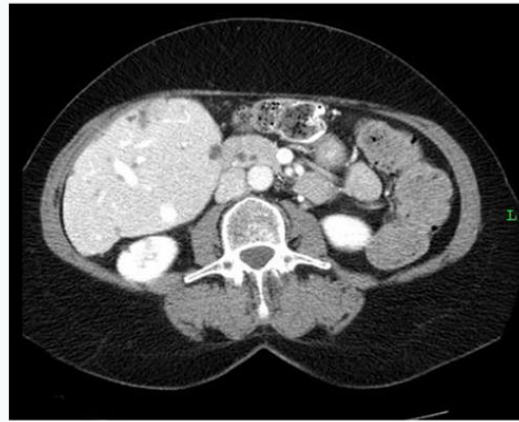

January-2006

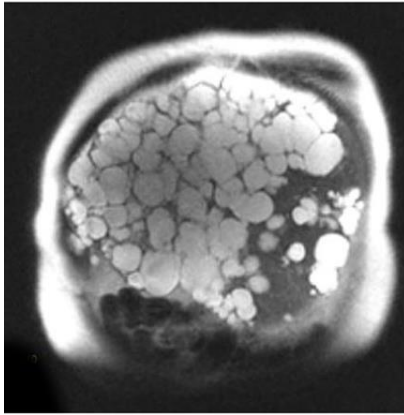

June-2006

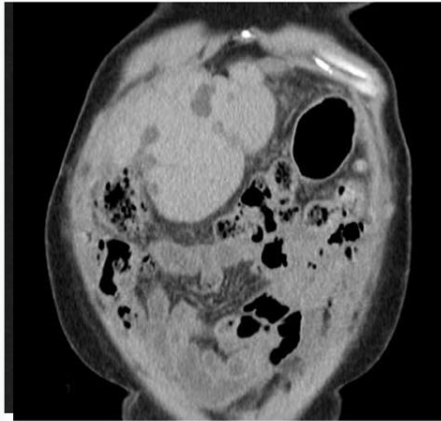

July-2014

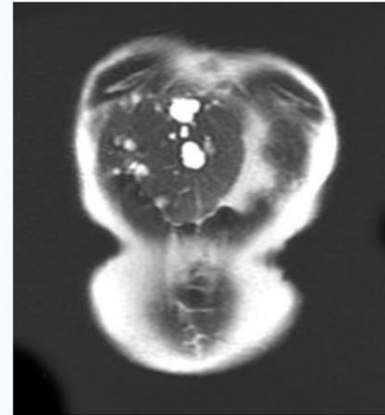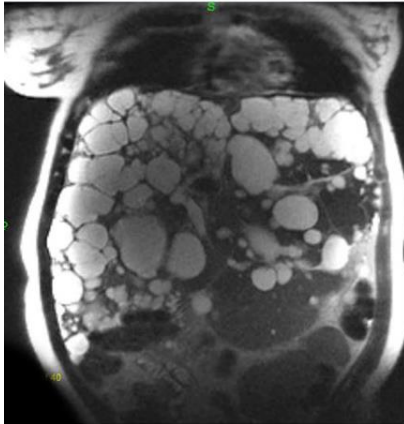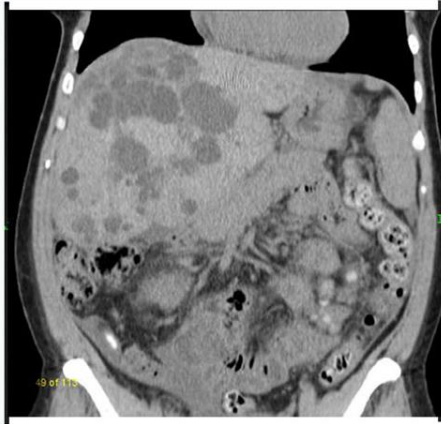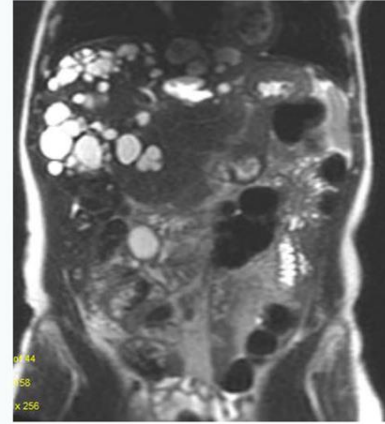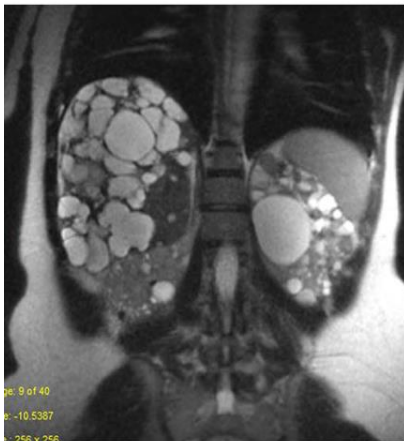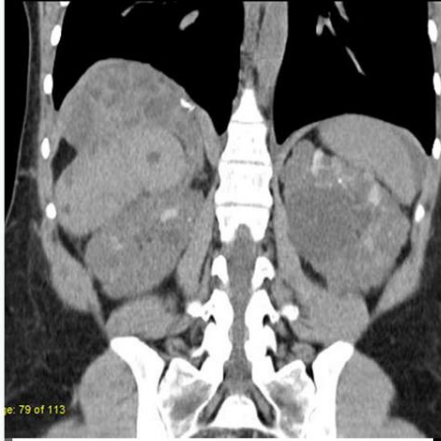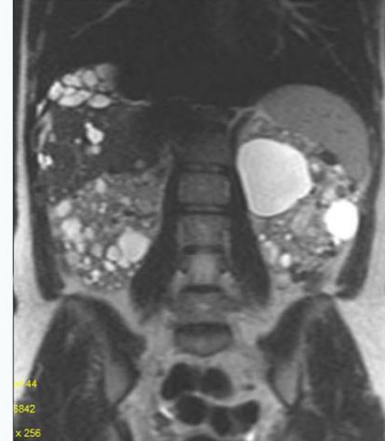

**November-1998**

**June-2000**

**March-2014**

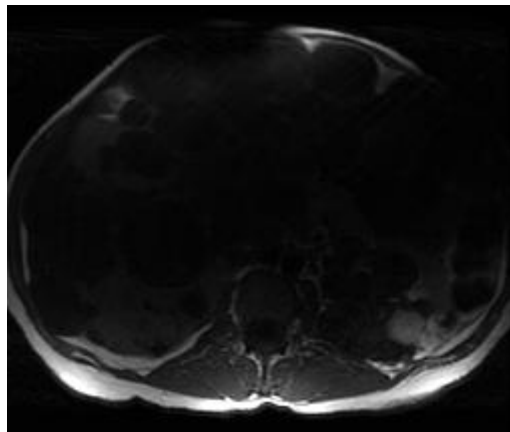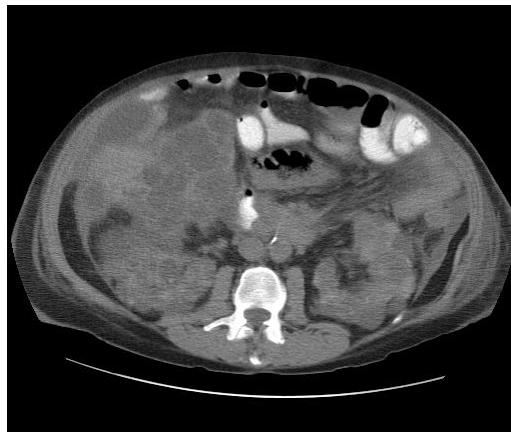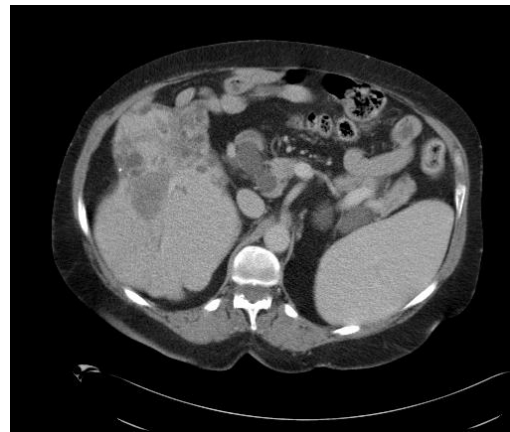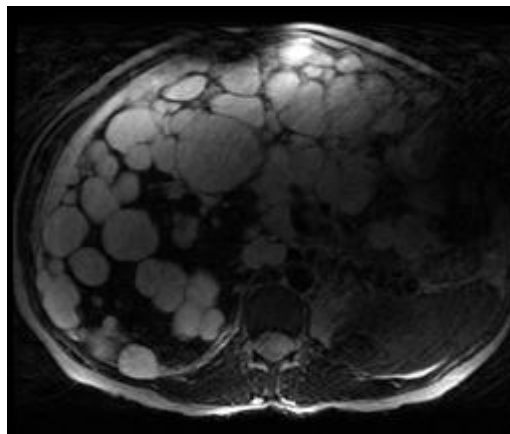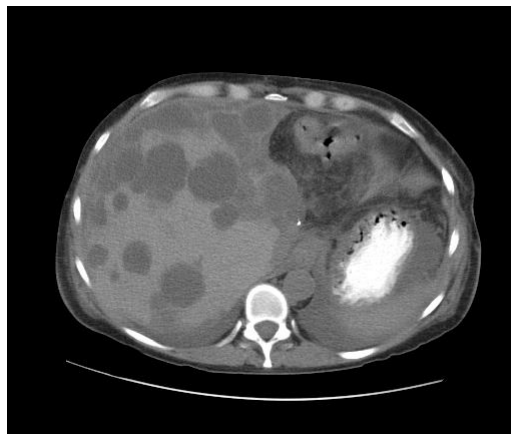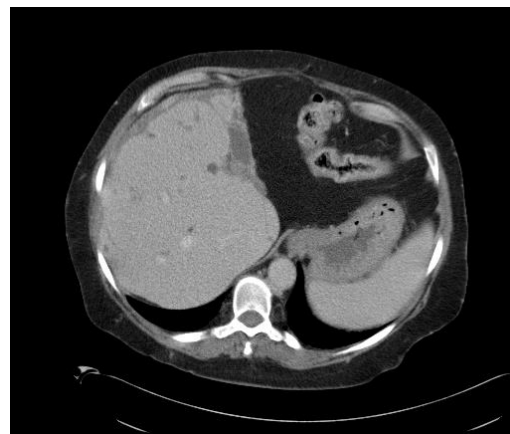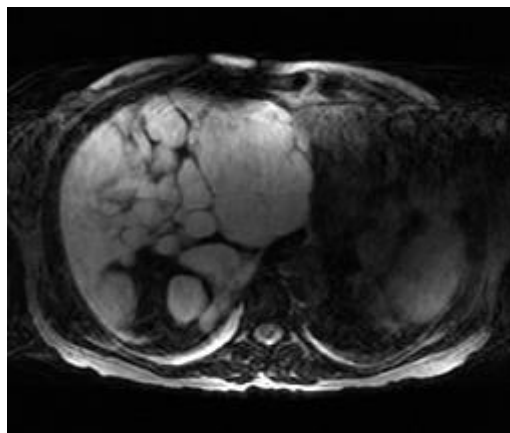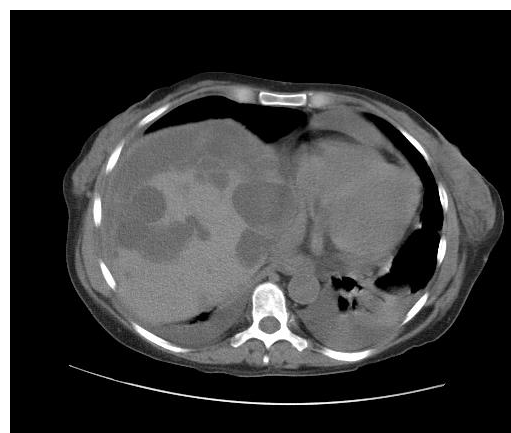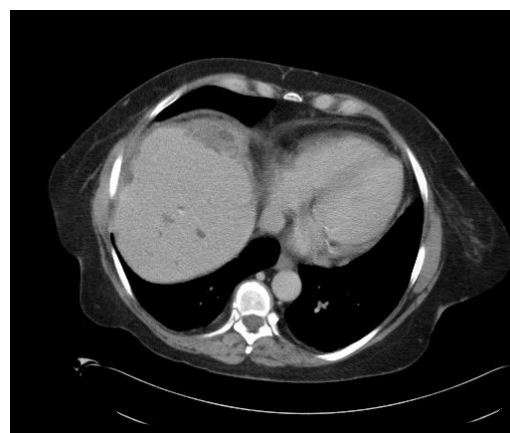

April-2006

May-2006

December-2009

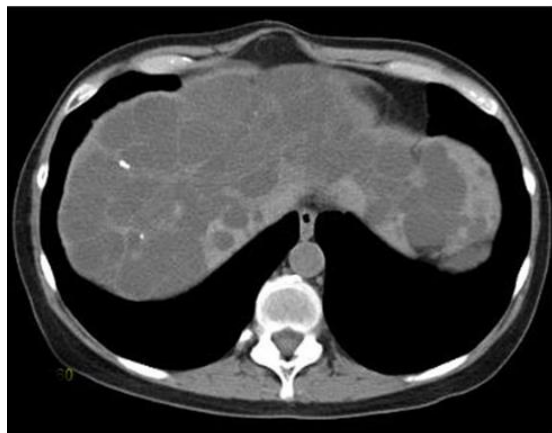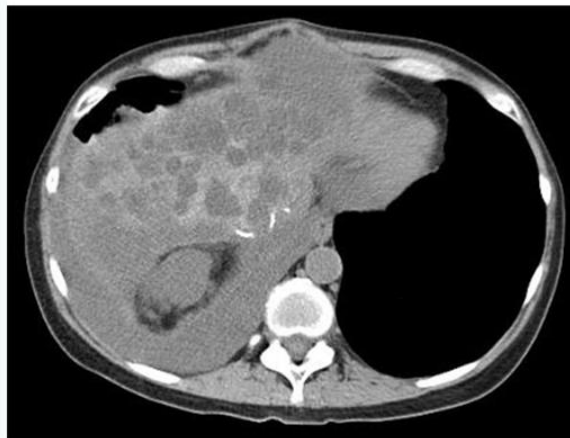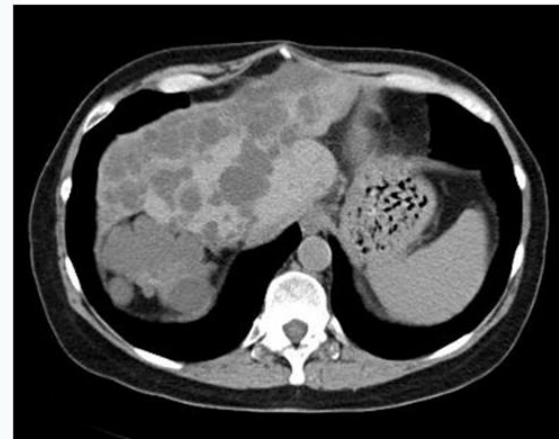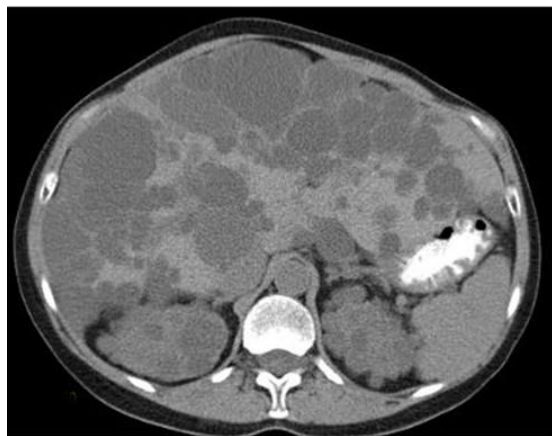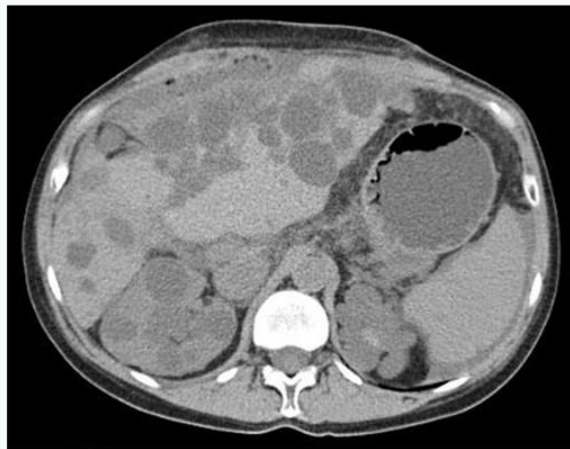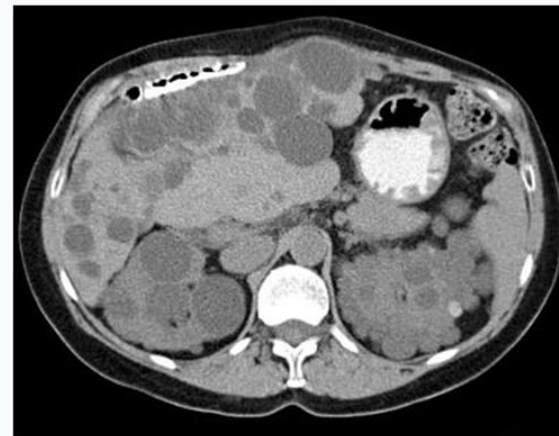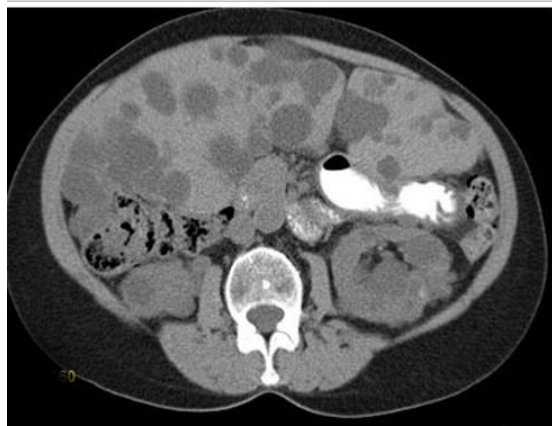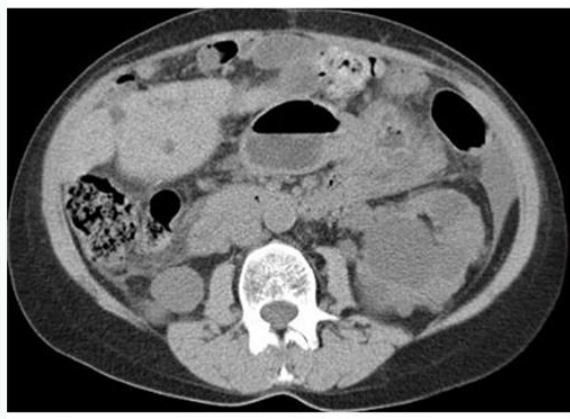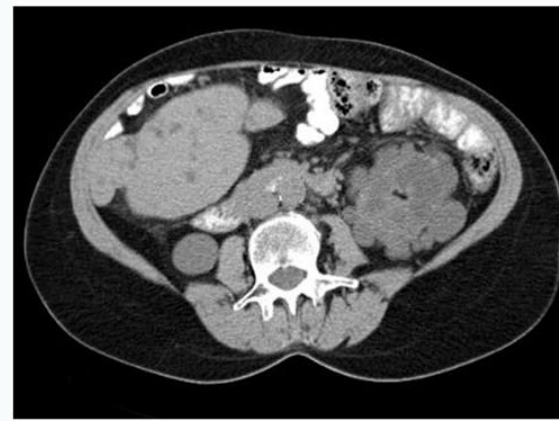



April-1997

May-1997

July-2002

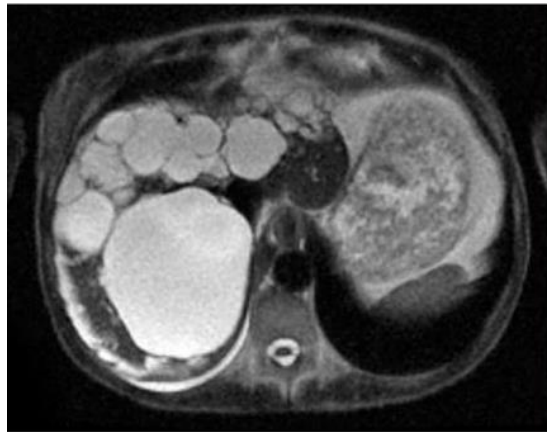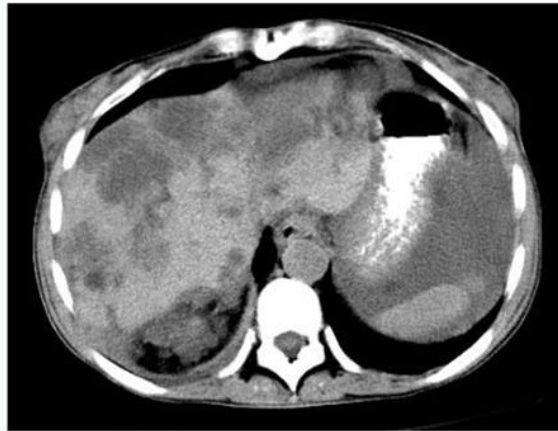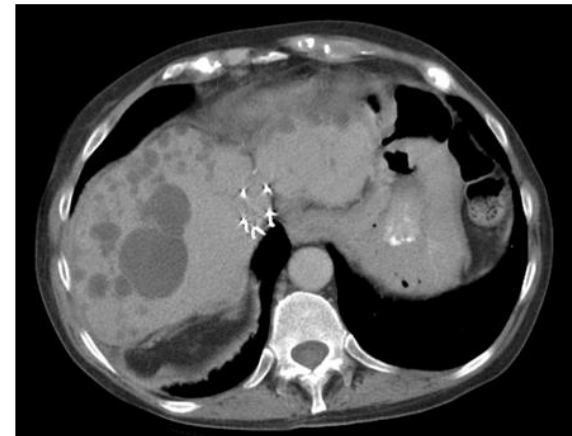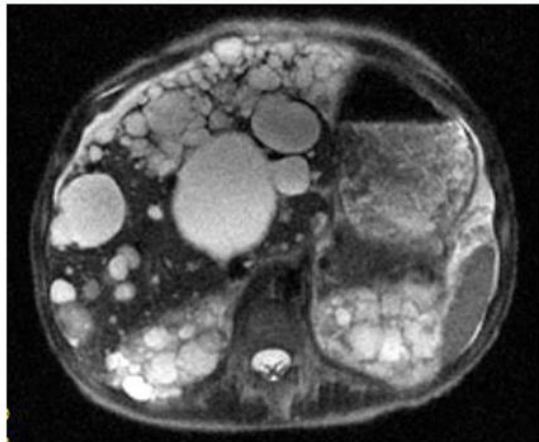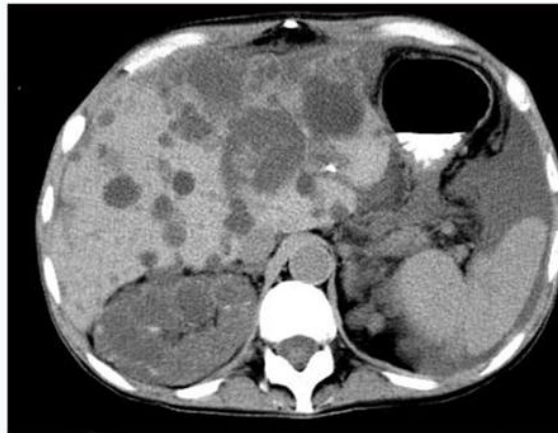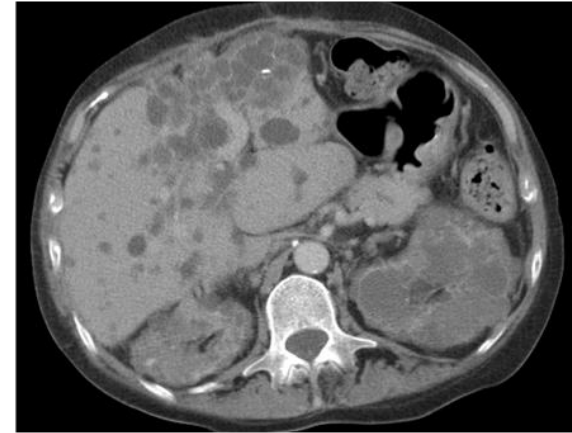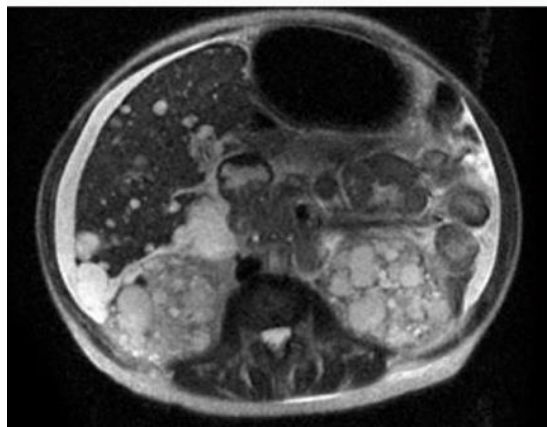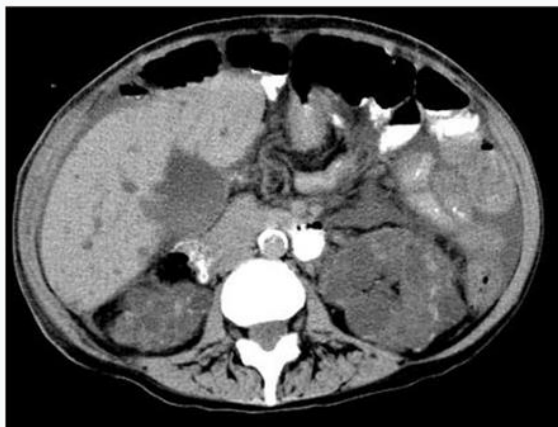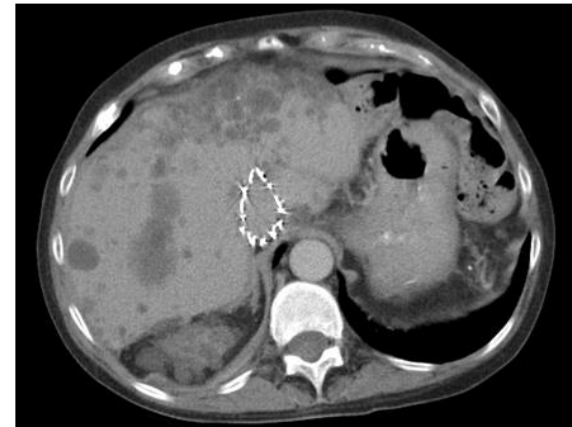

March-2007

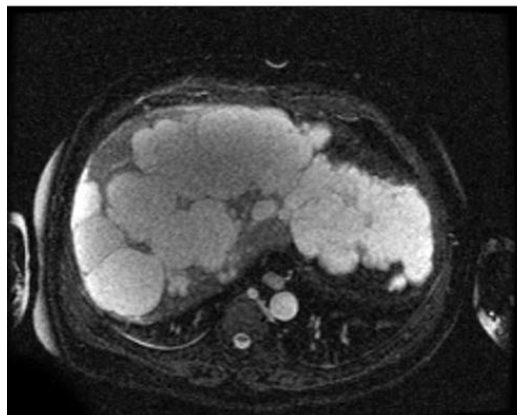

March-2007

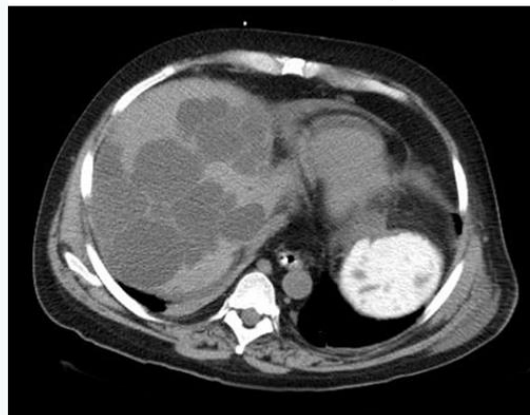

August-2011

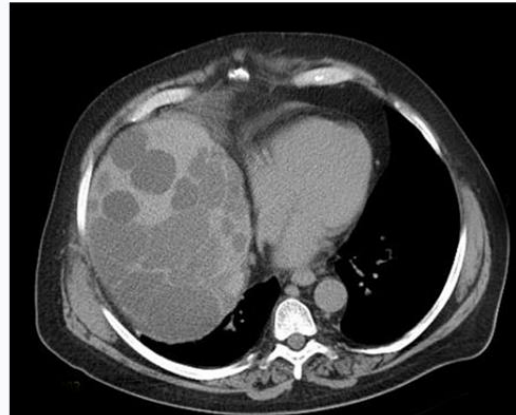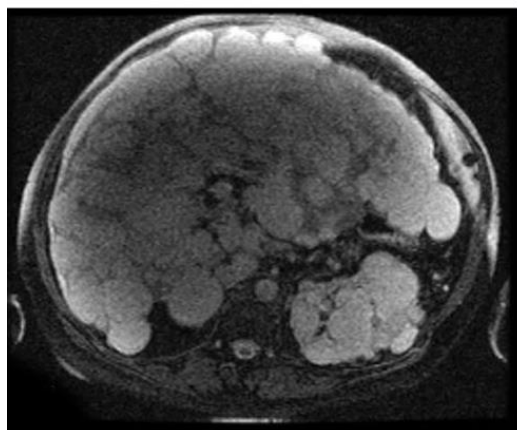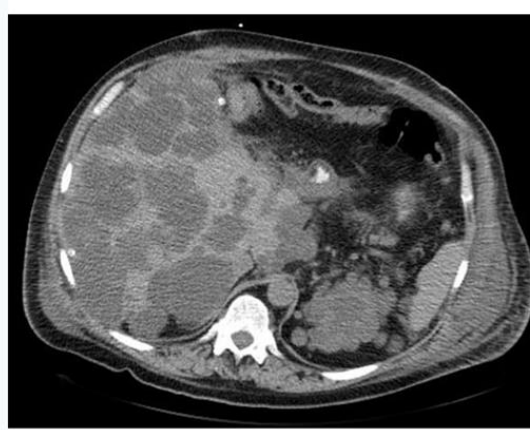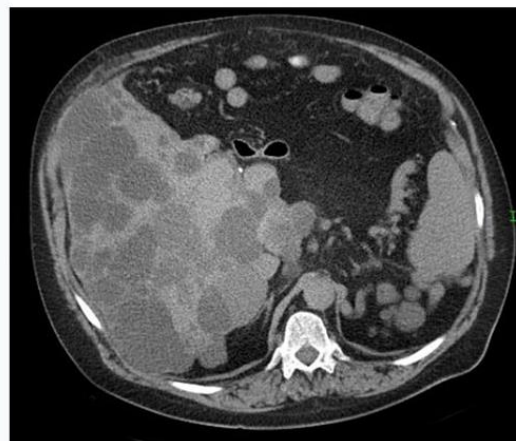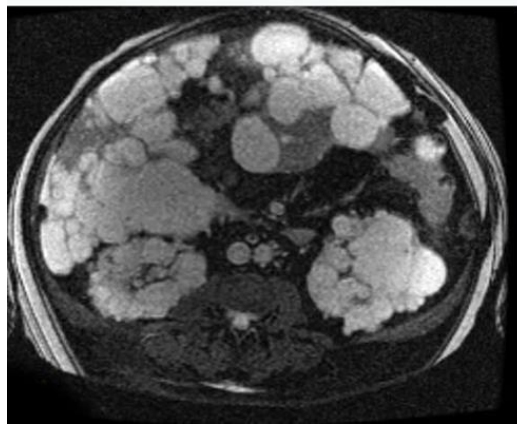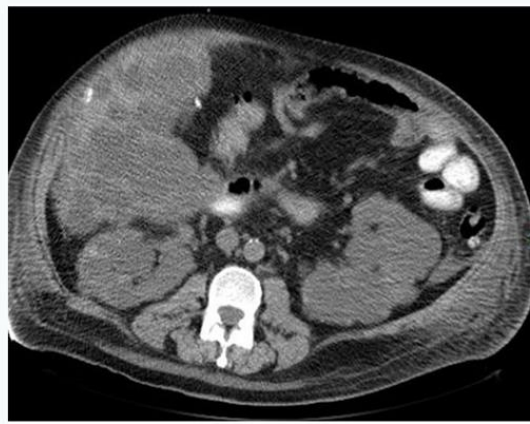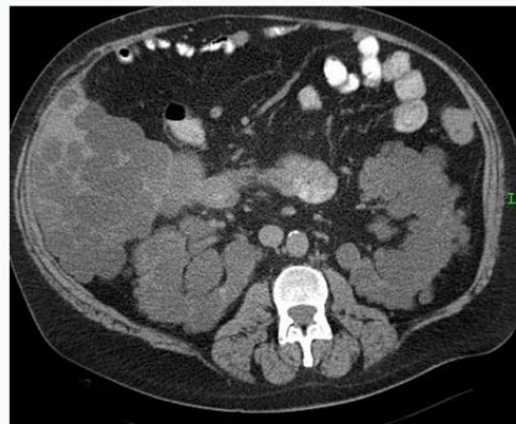

February-2006

July-2006

November-2011

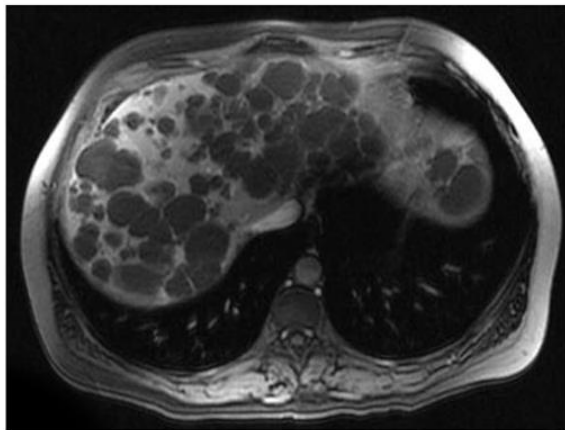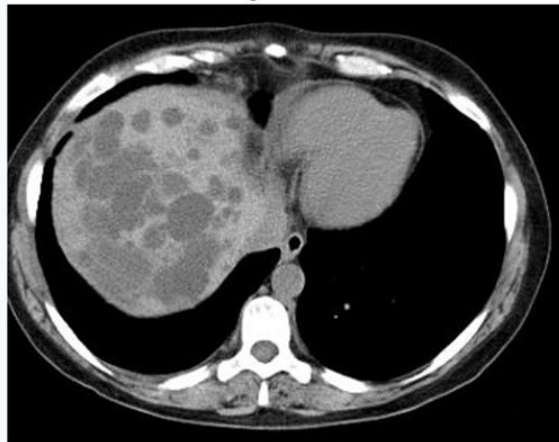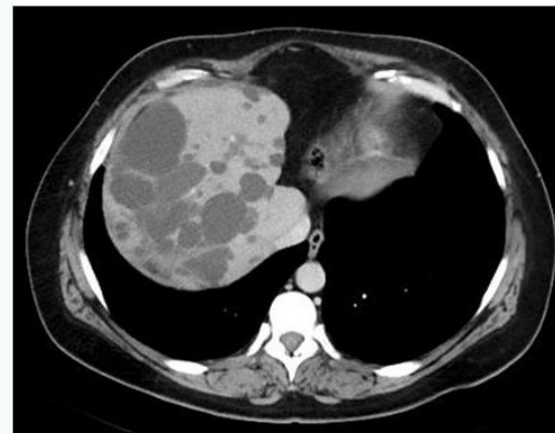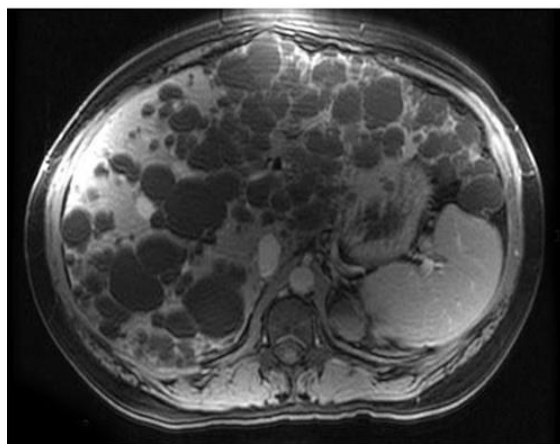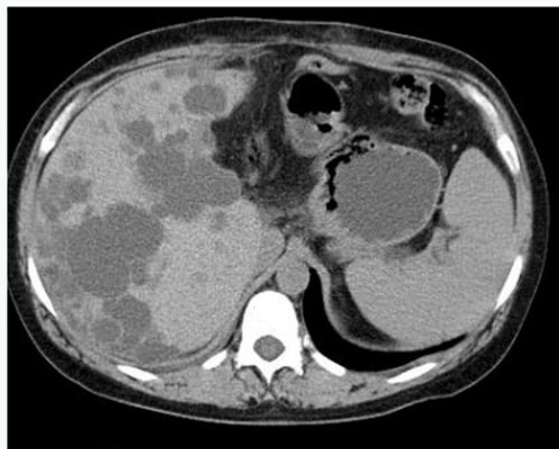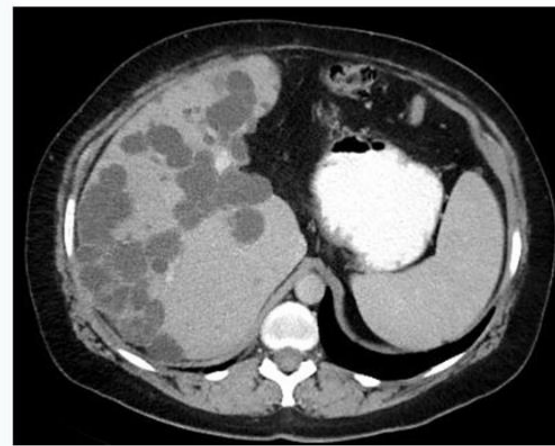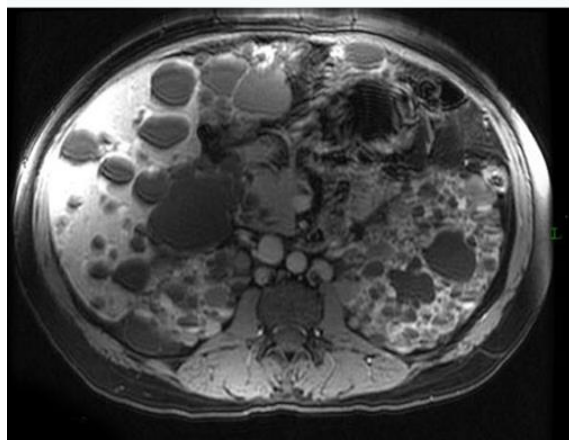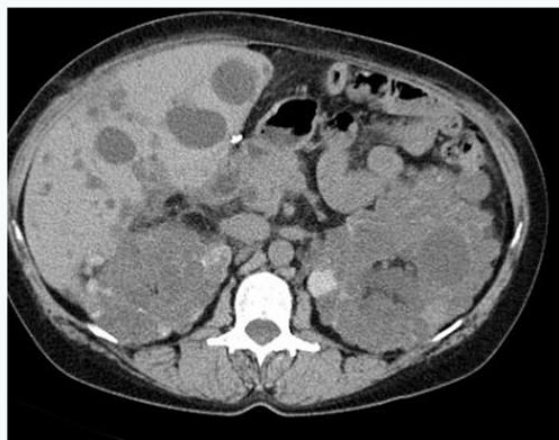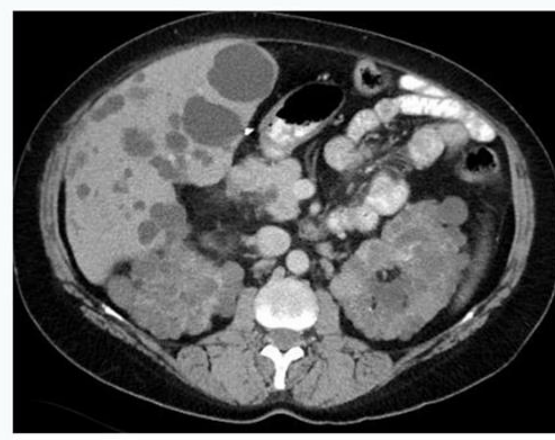

December-1993

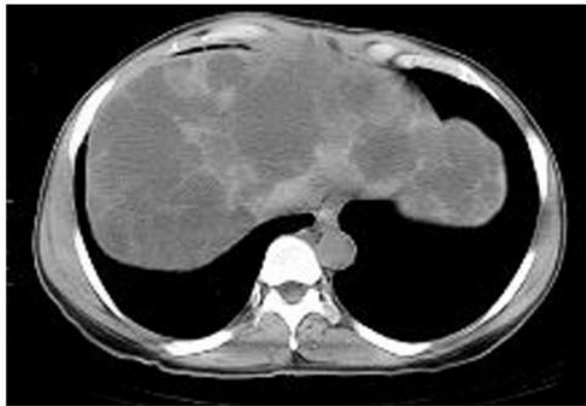

January-1994

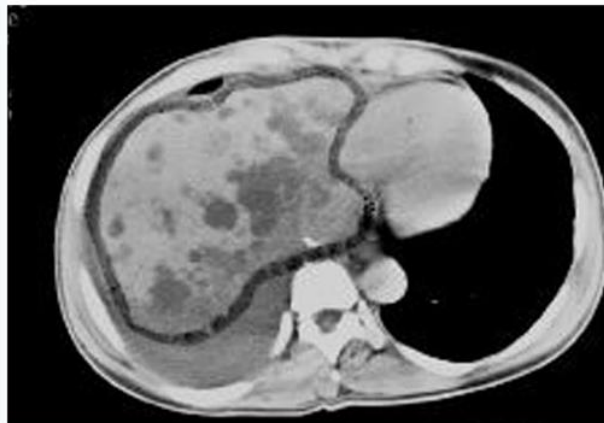

May-1998

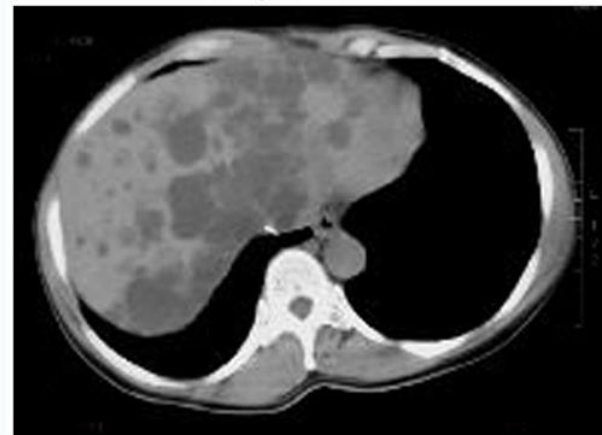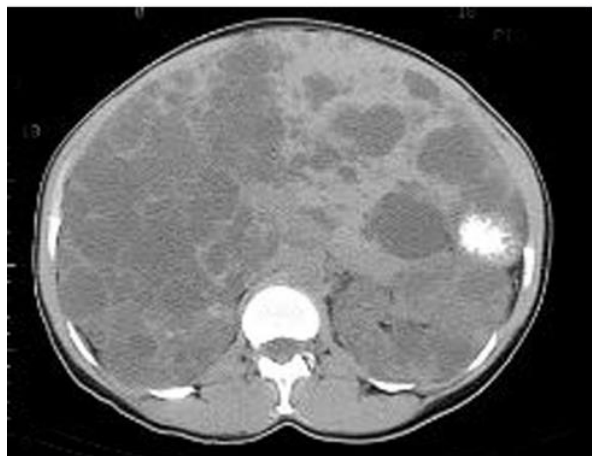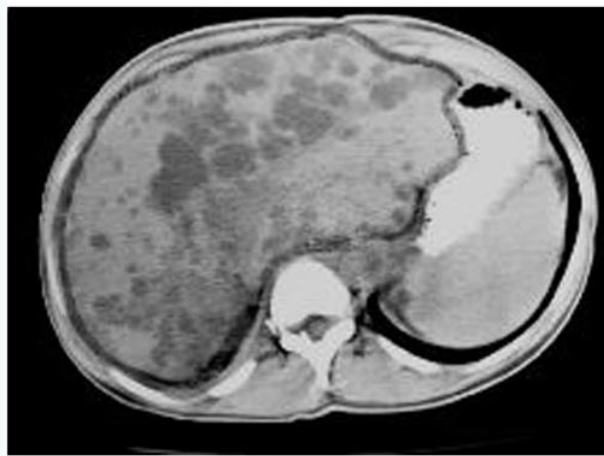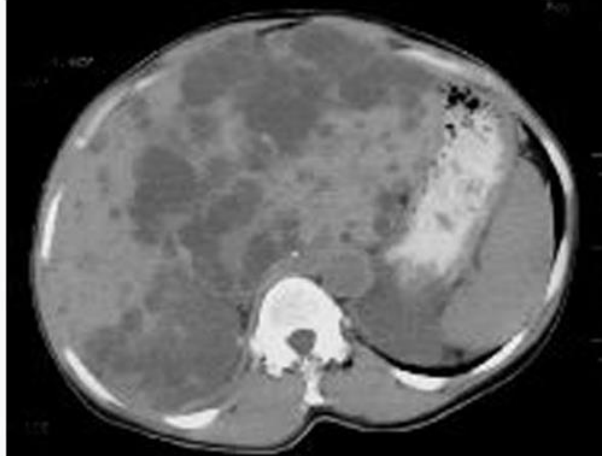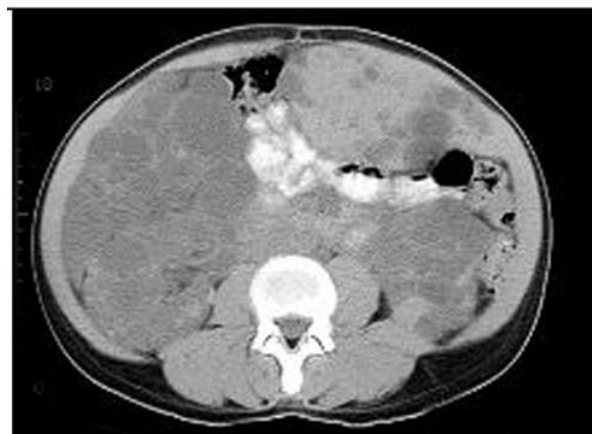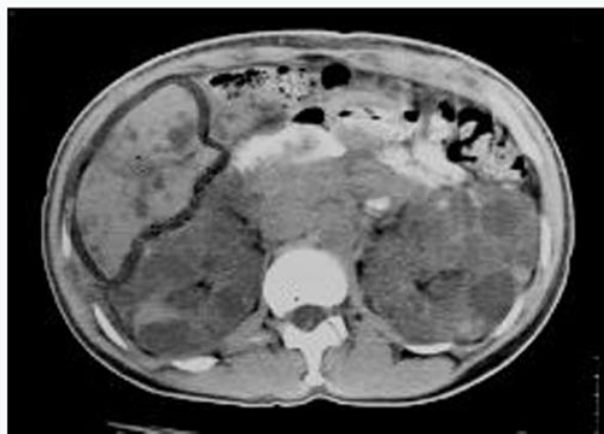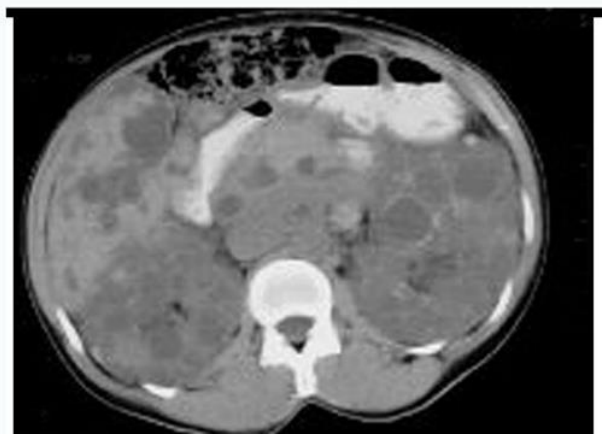

November-1994

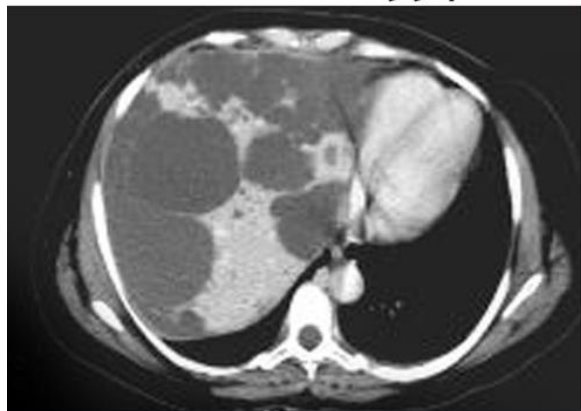

August-1995

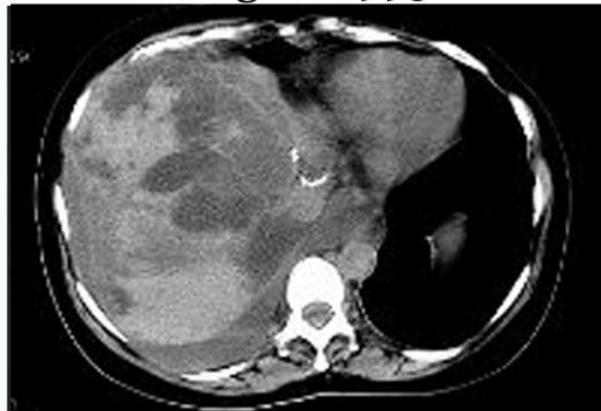

August-1996

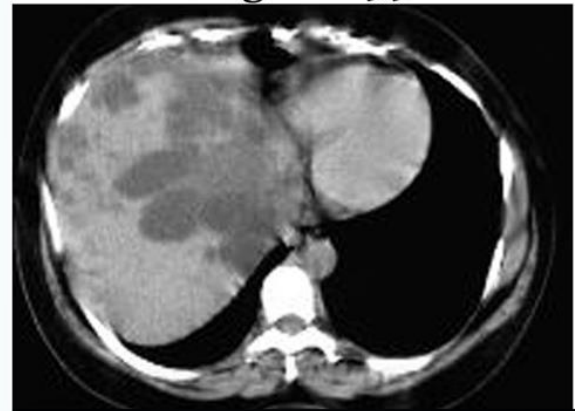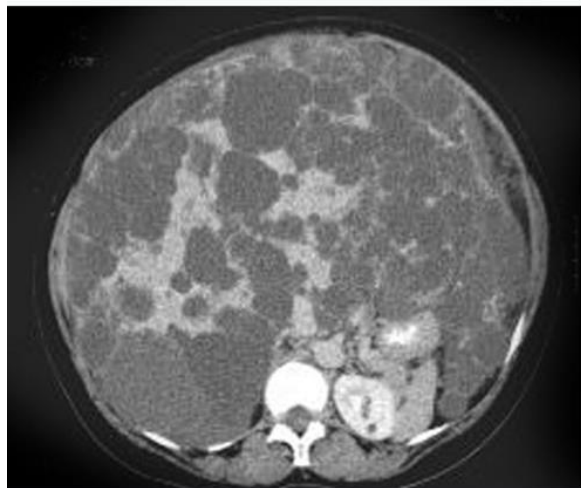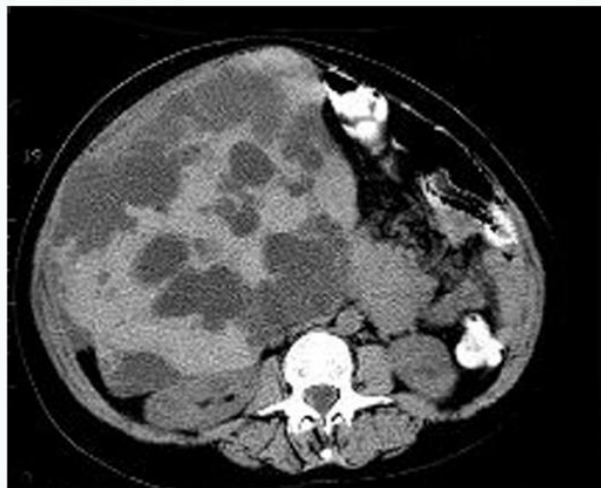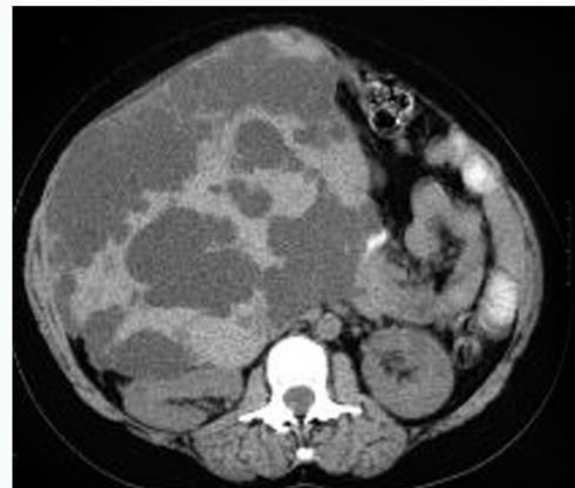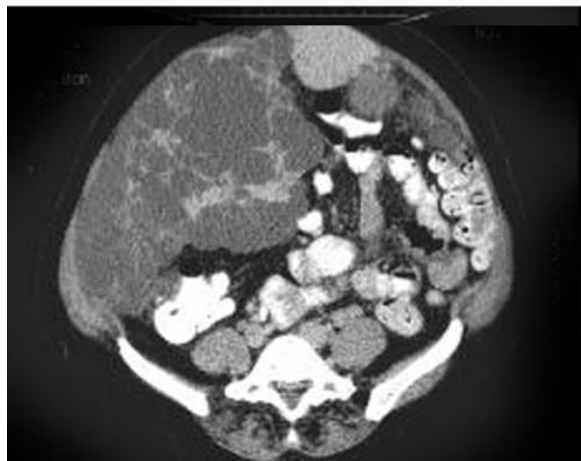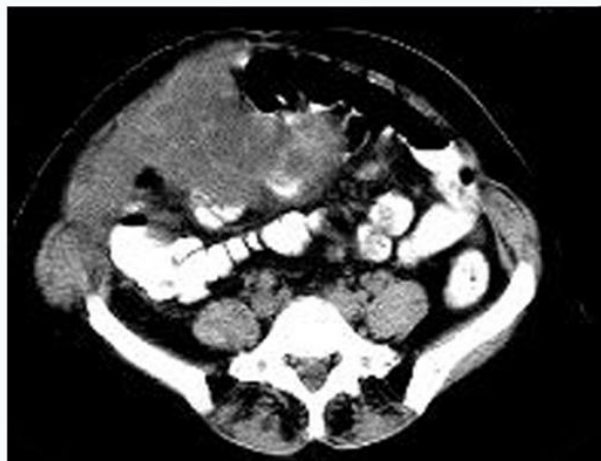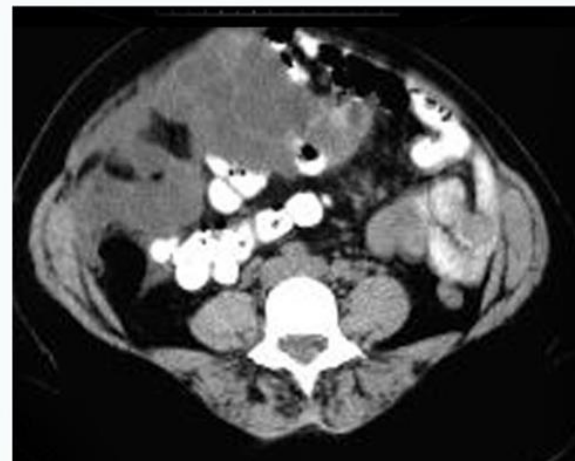

**June-2000**

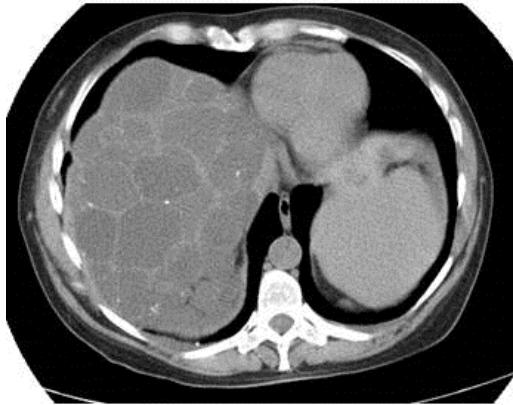

**September-2000**

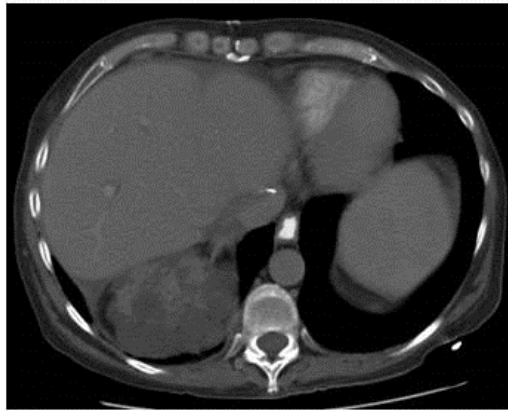

**September-2014**

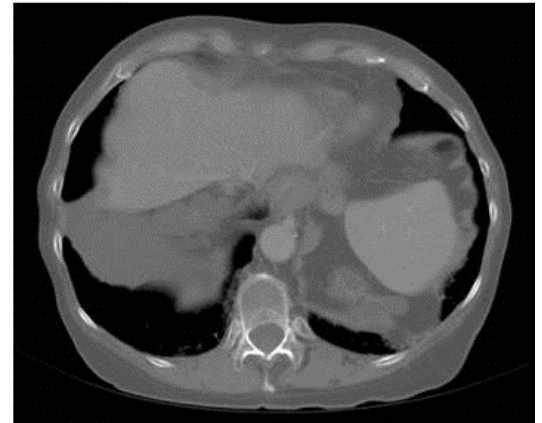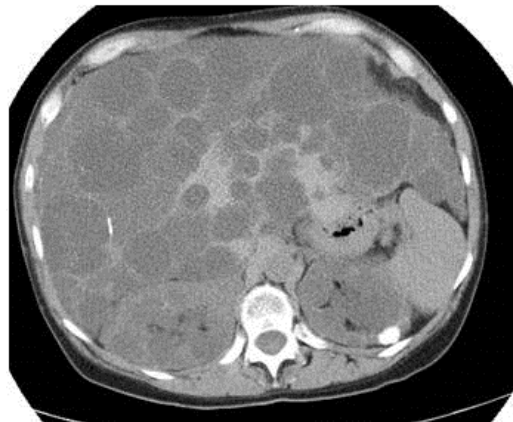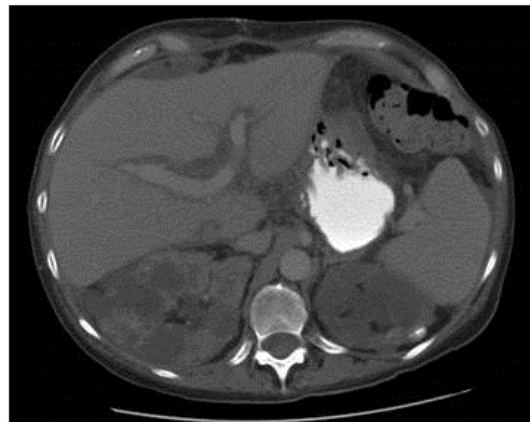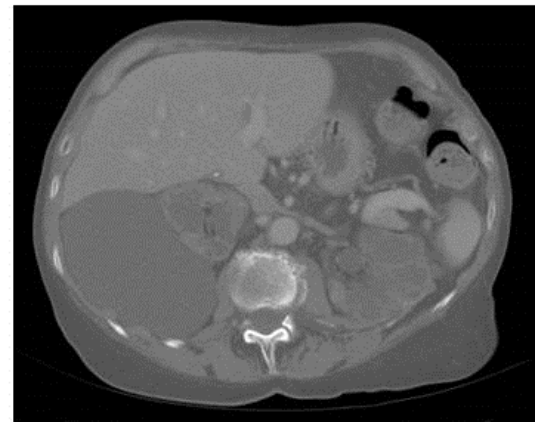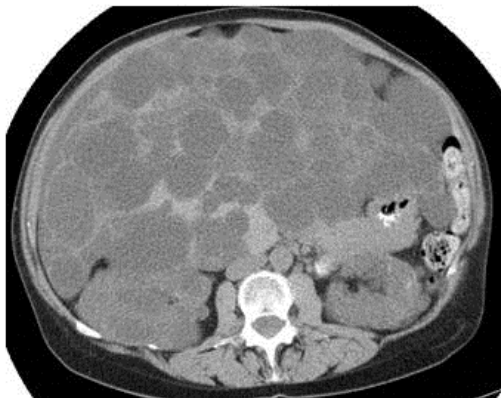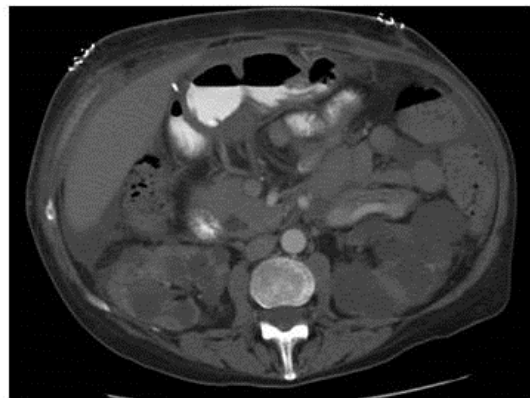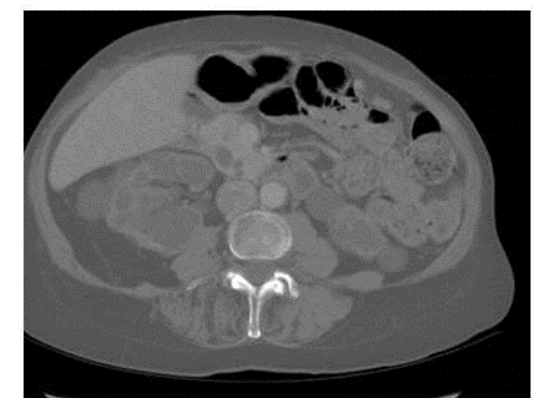

May-2005

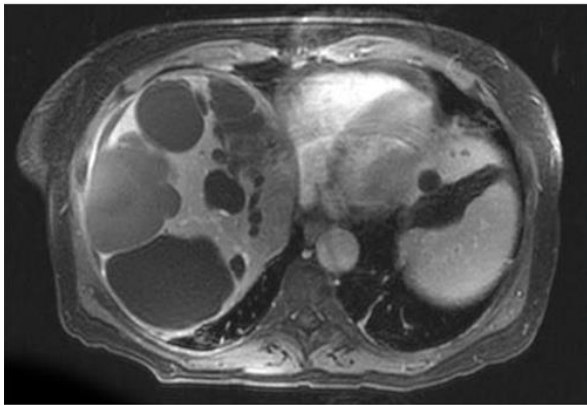

March-2006

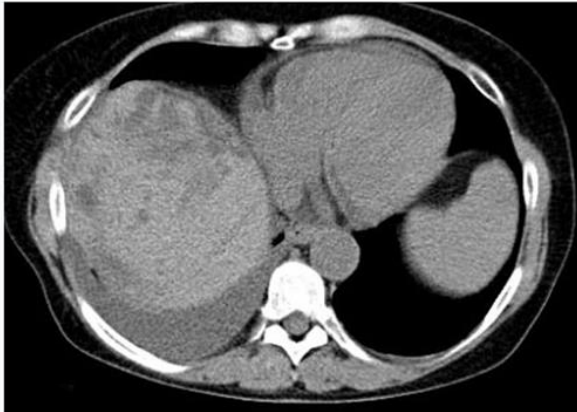

March-2014

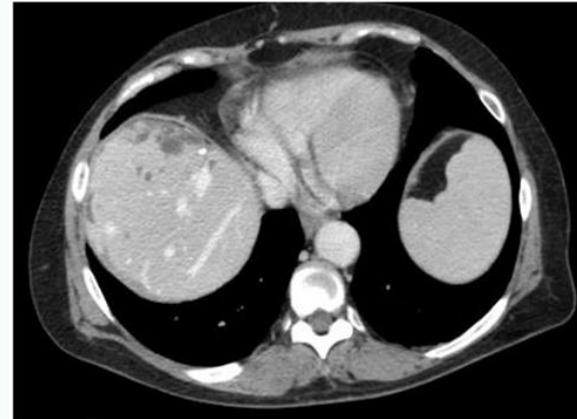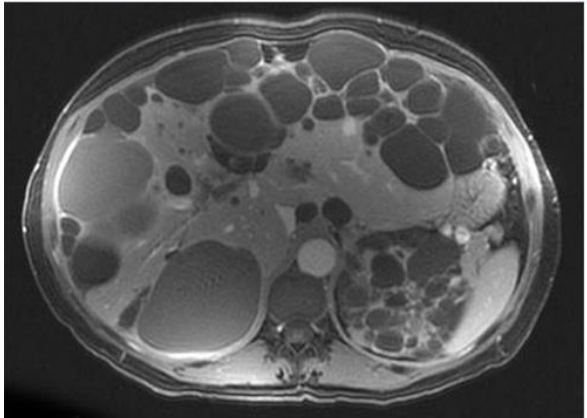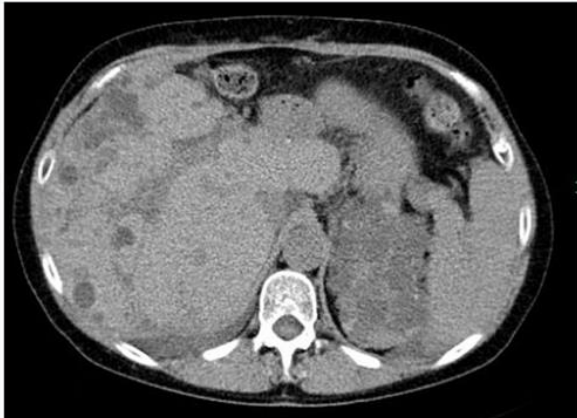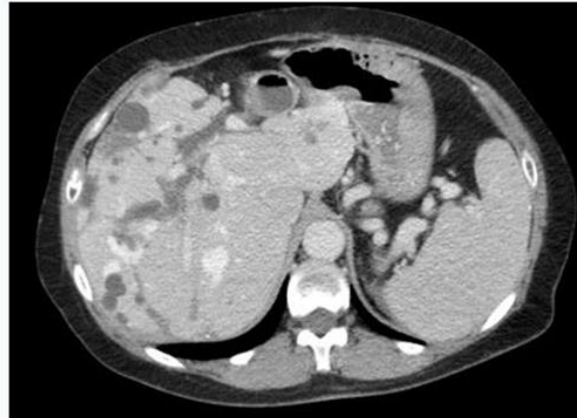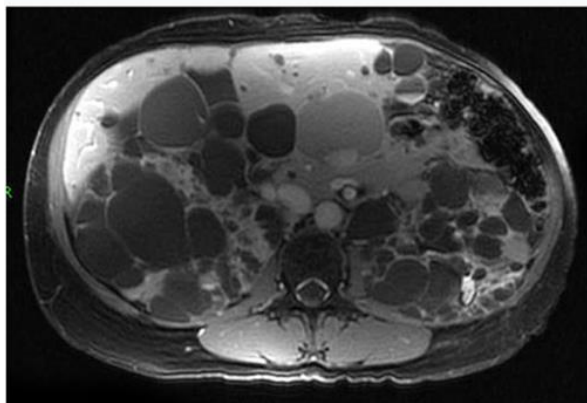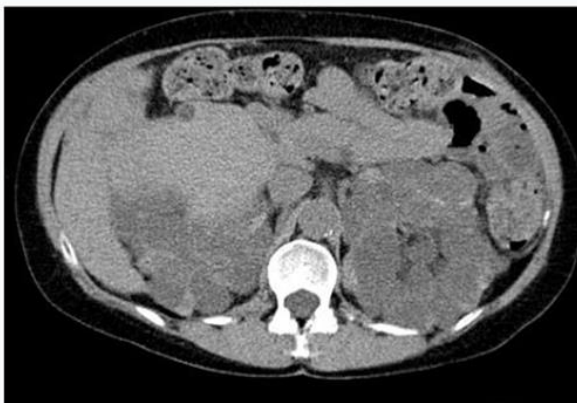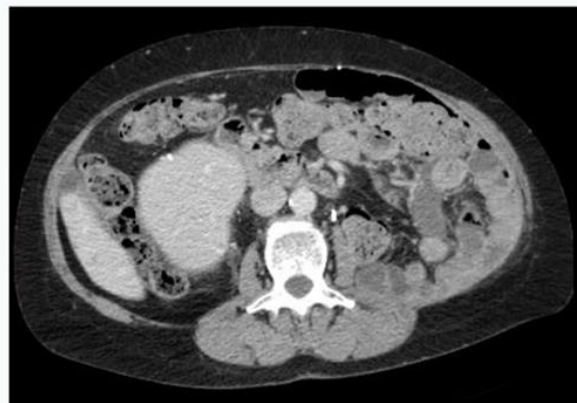

March-2000

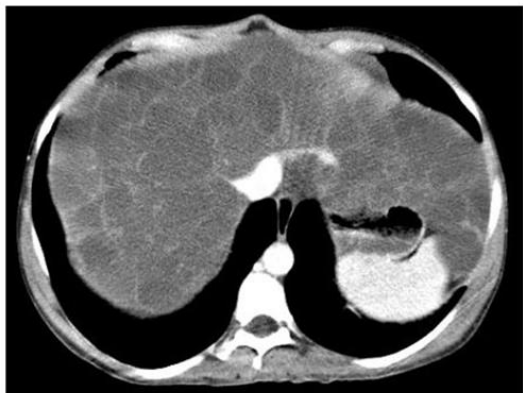

July-2000

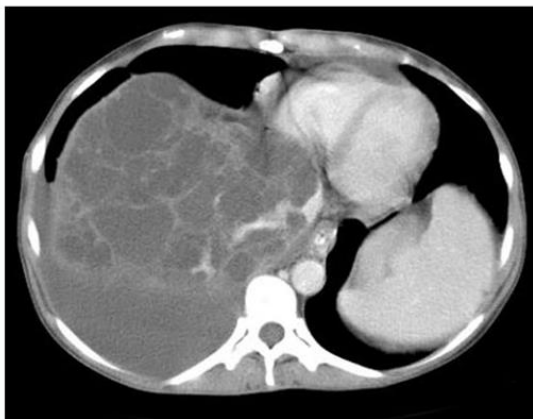

February-2010

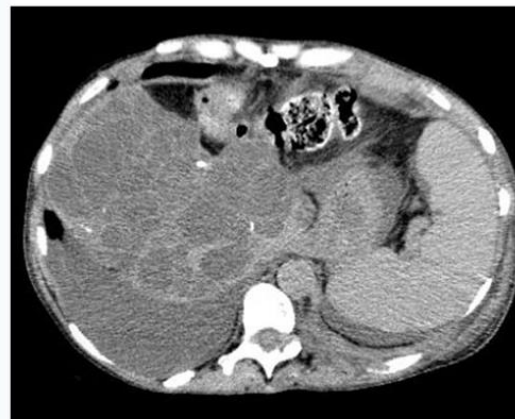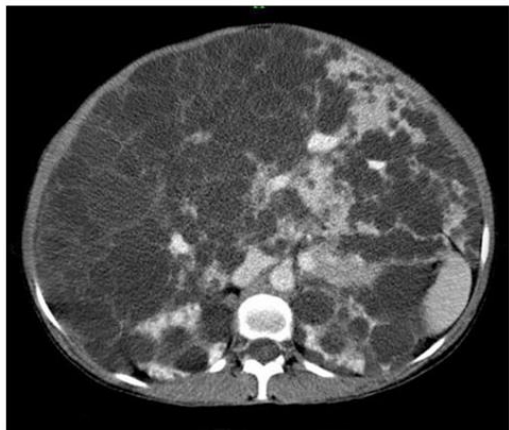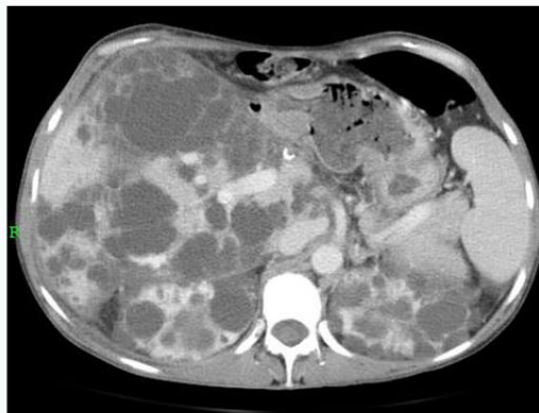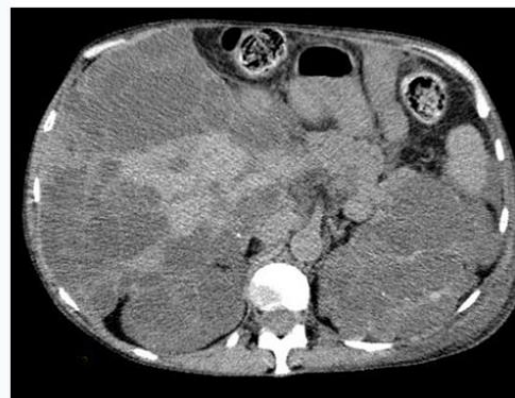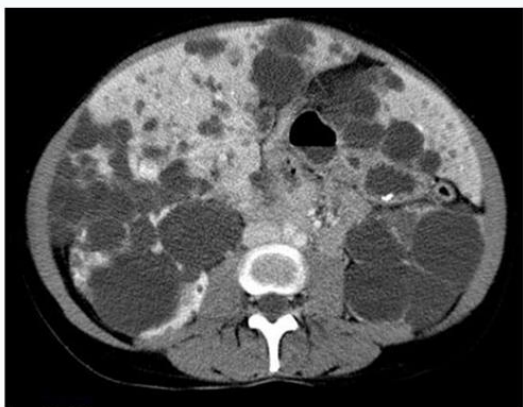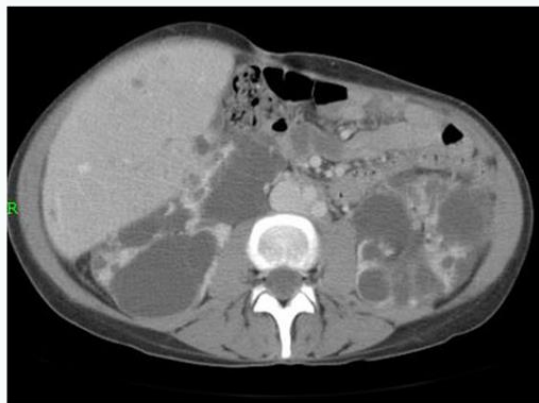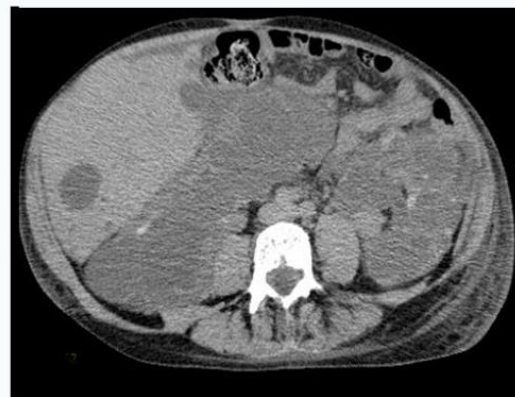



March-2008

May-2008

November-2013

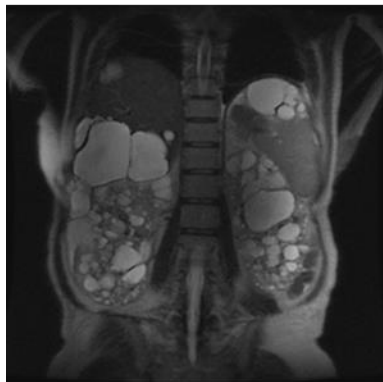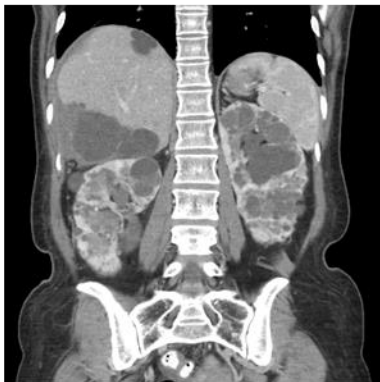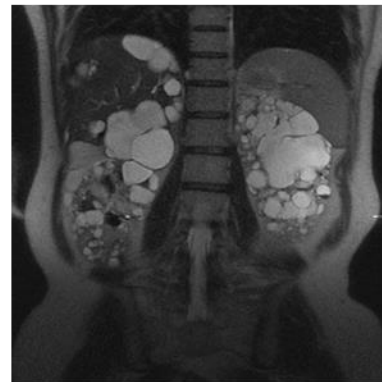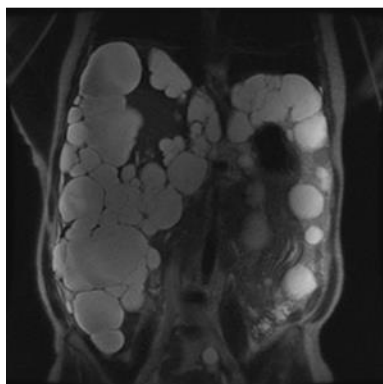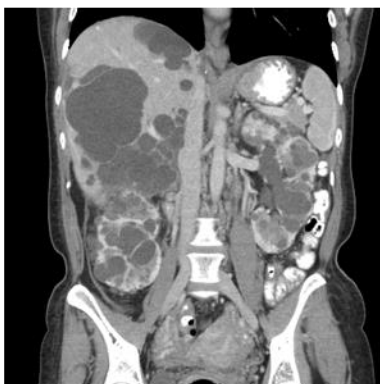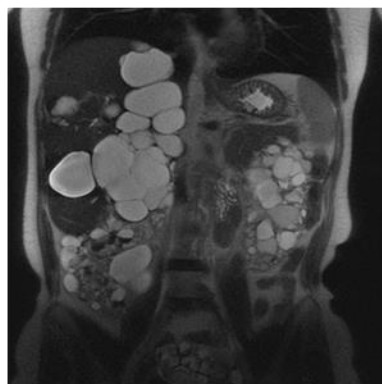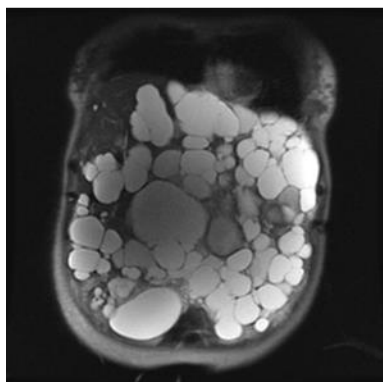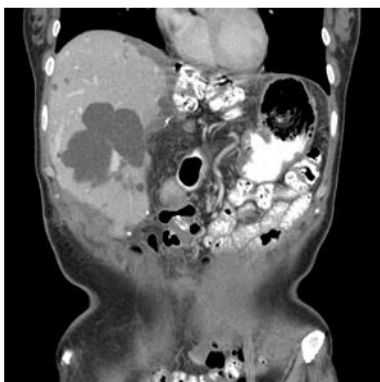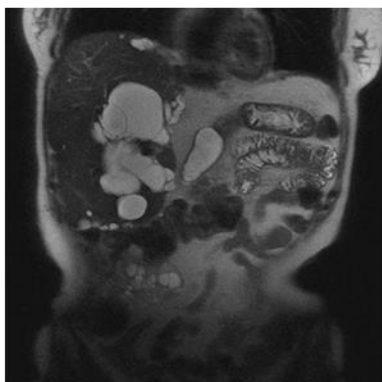

April-2002

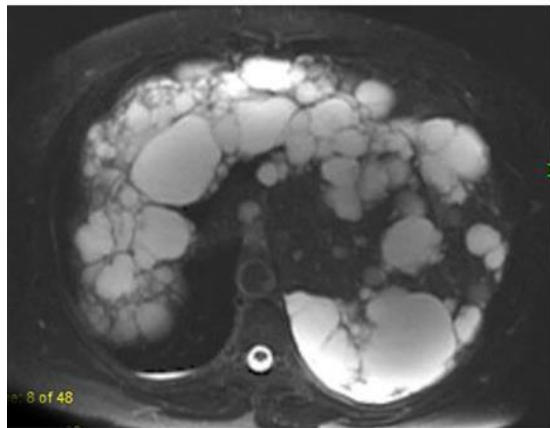

June-2002

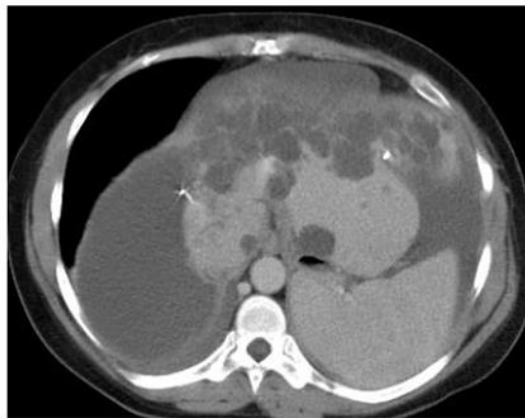

December-2014

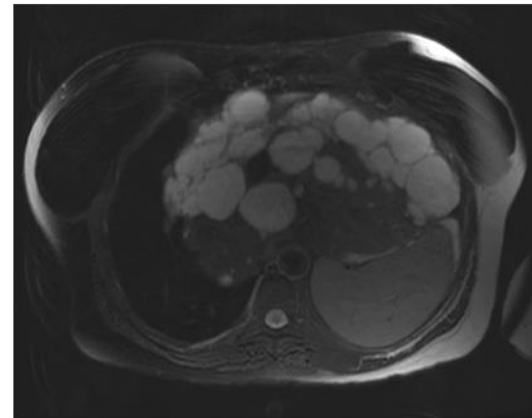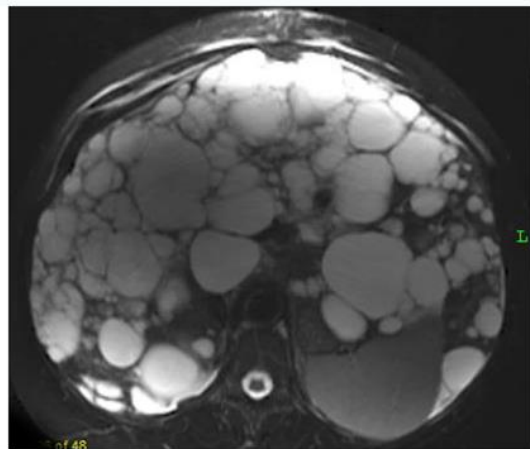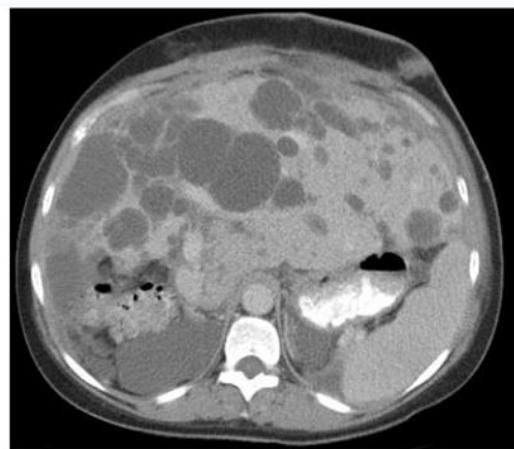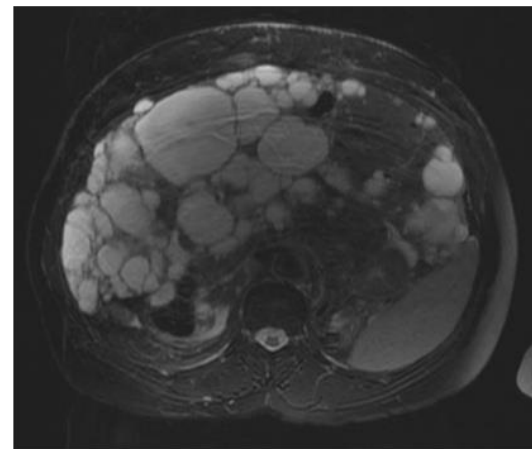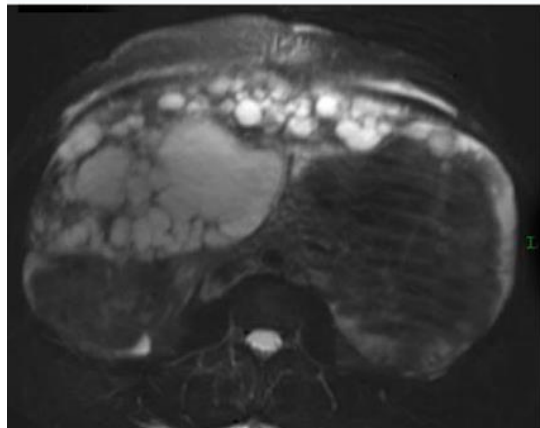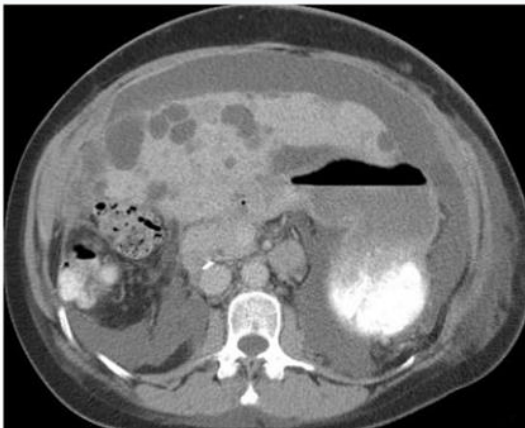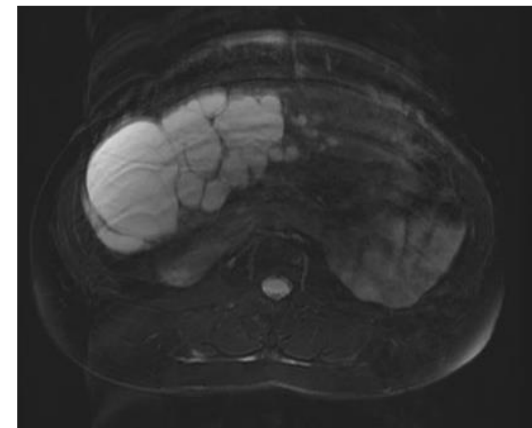

December-1994

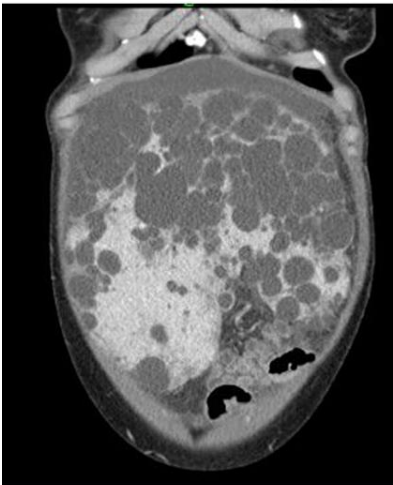

November-1995

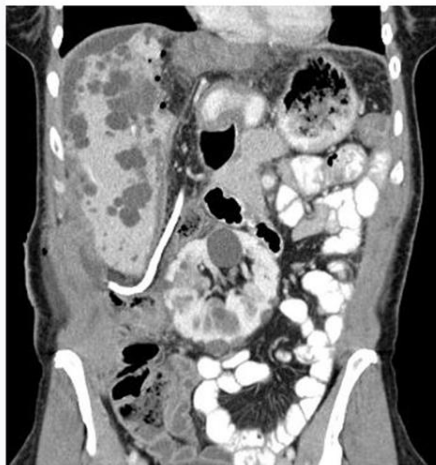

November 1997

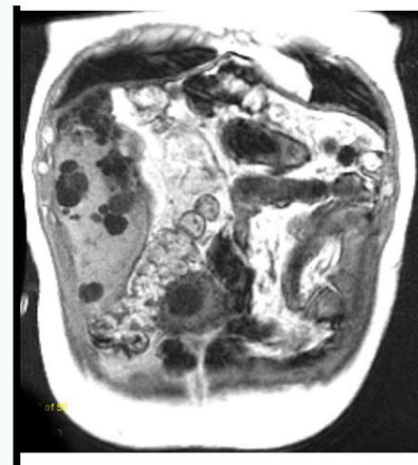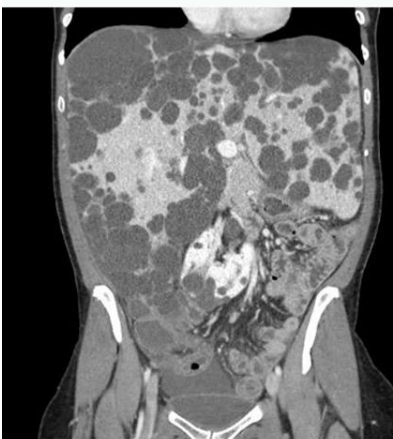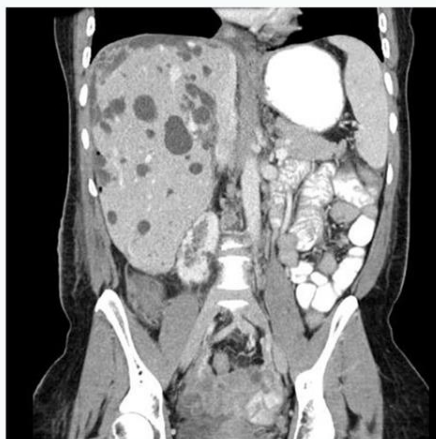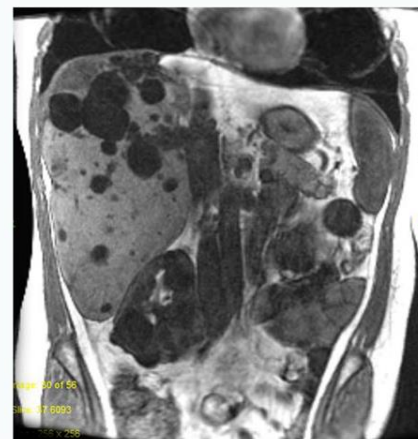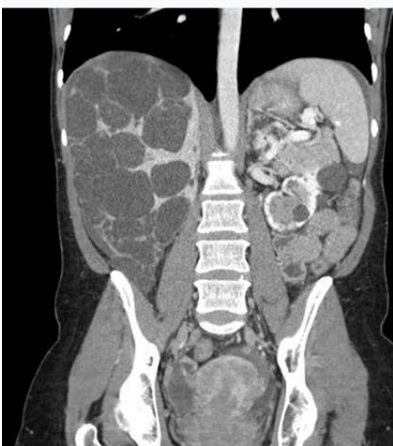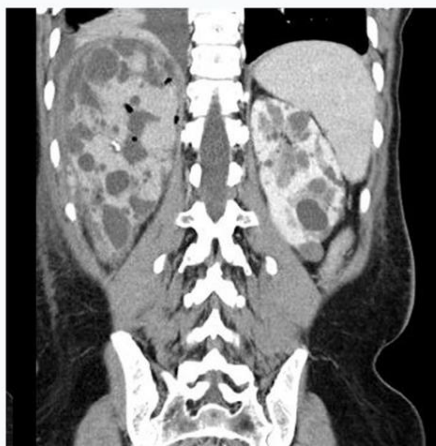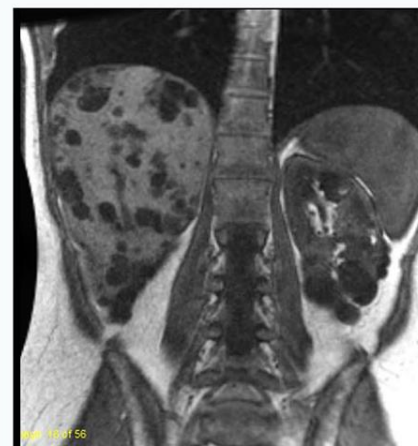

June-1996

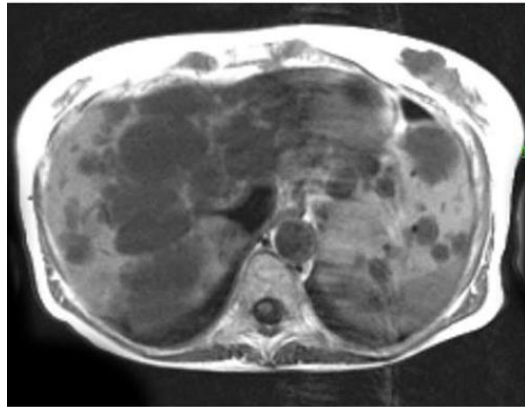

August-1996

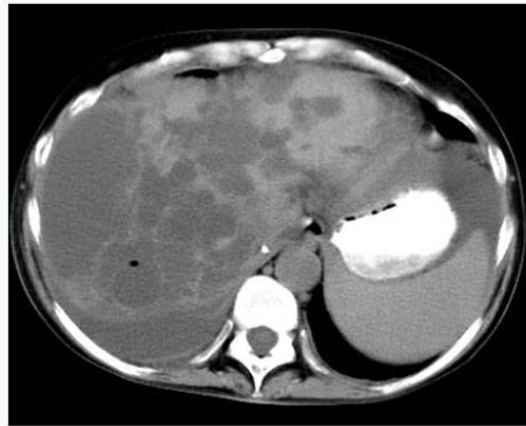

January-2009

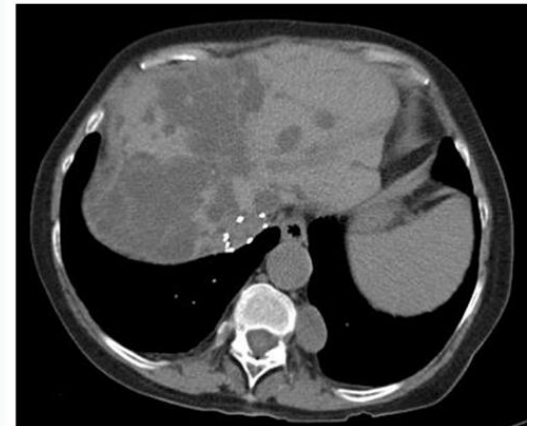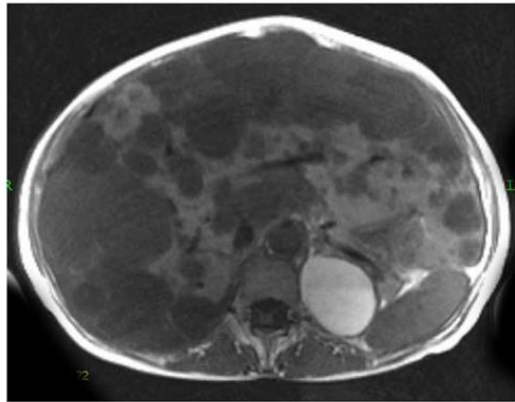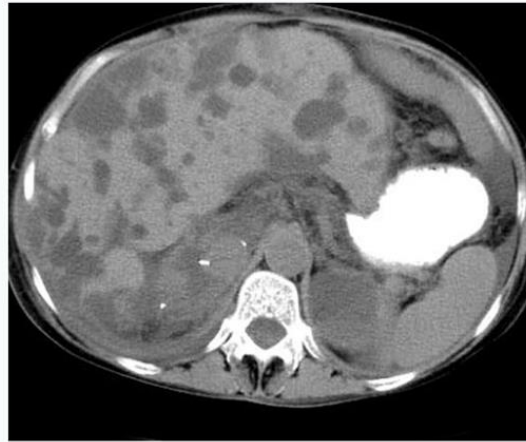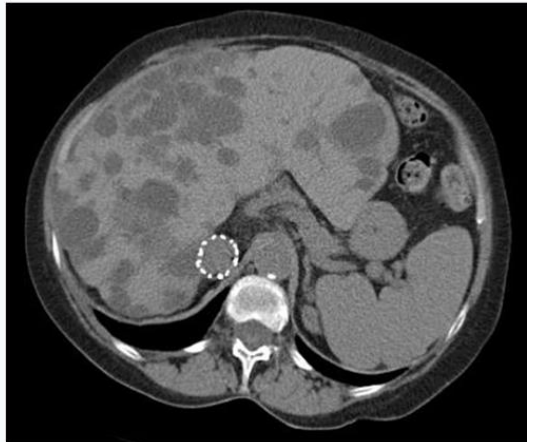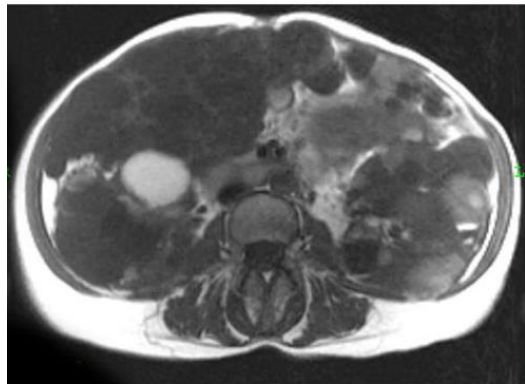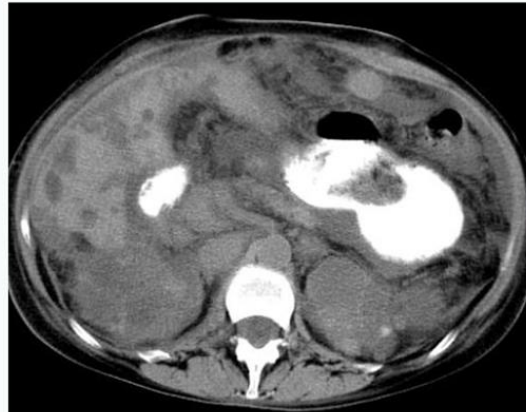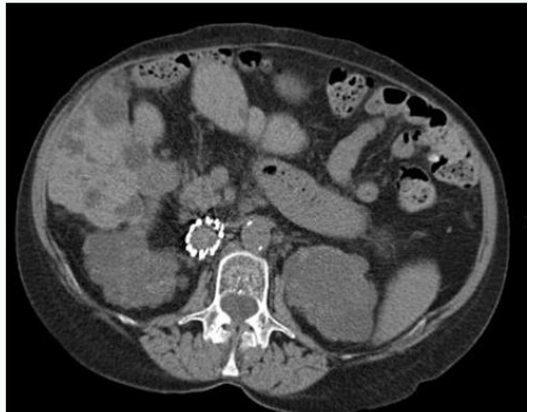

October-1999

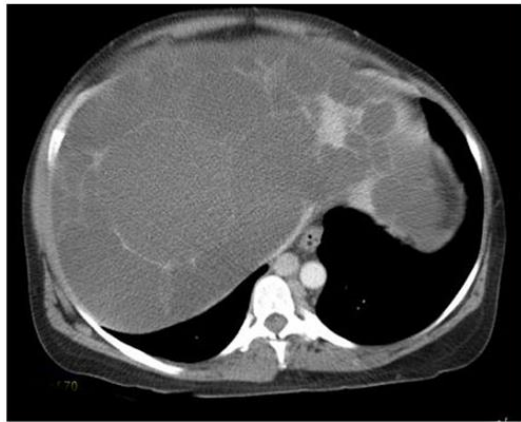

November-1999

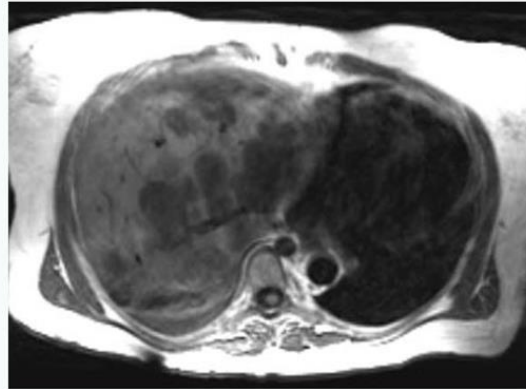

August-2011

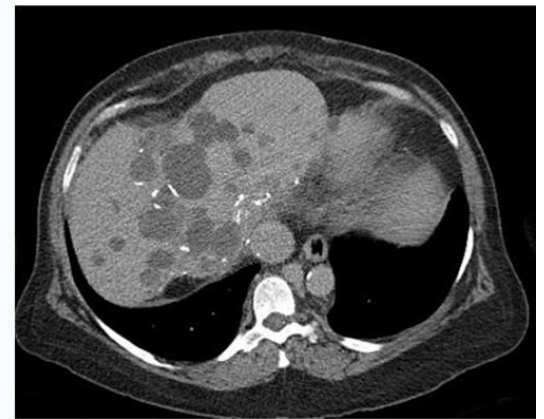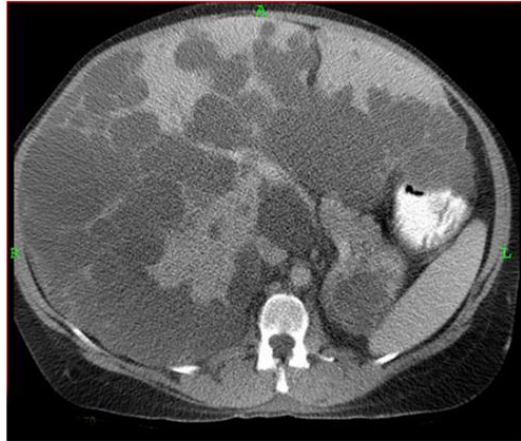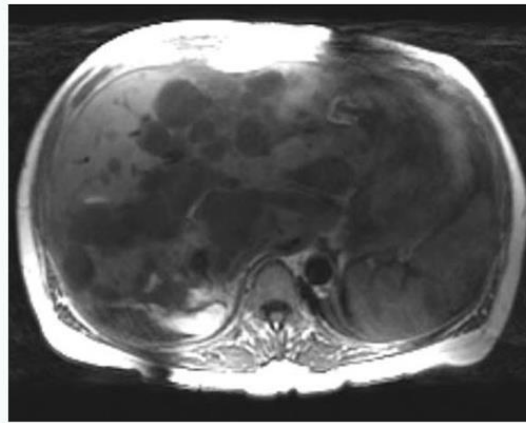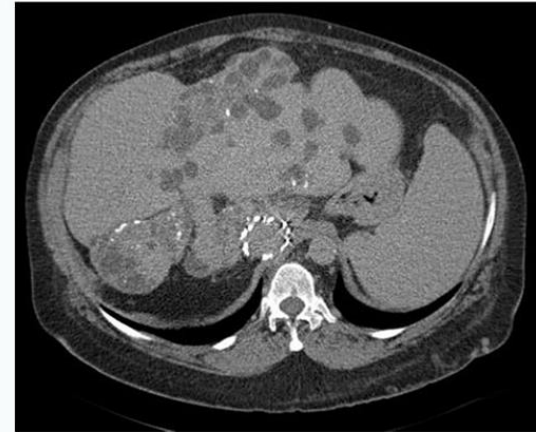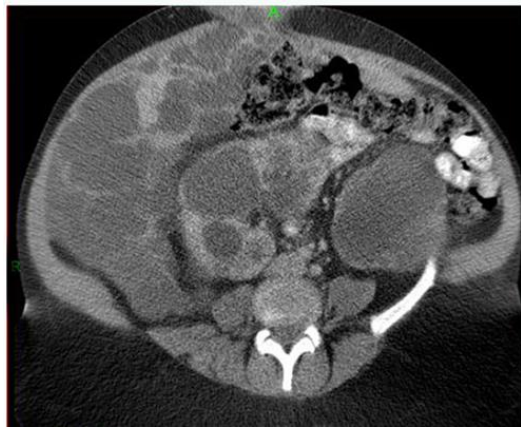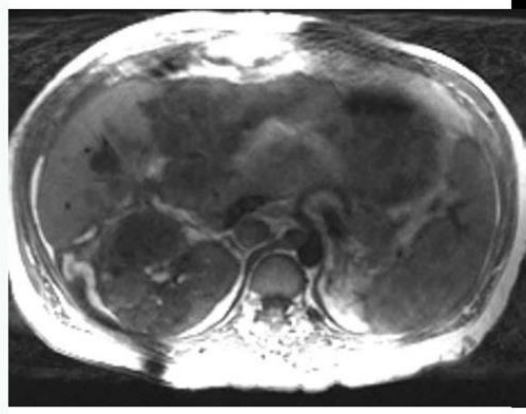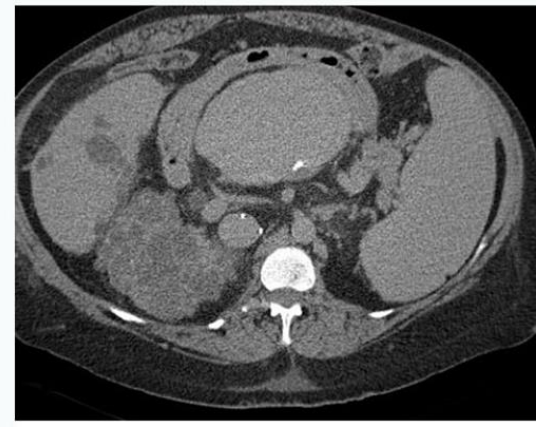

September-1996

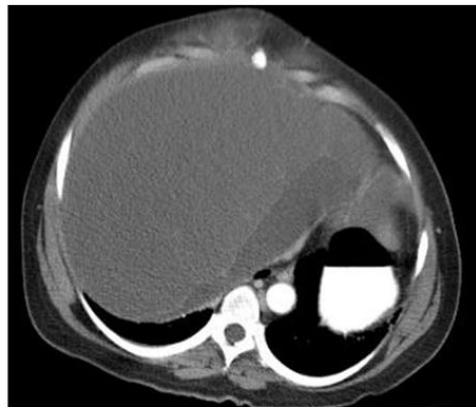

October-1996

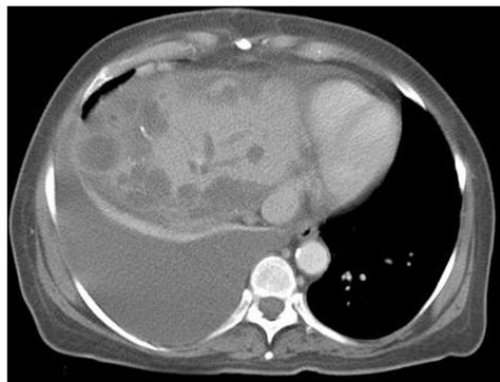

April-2012

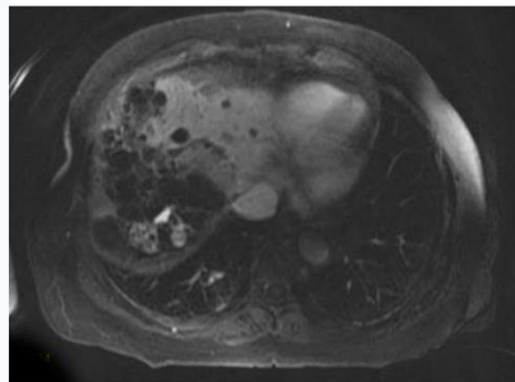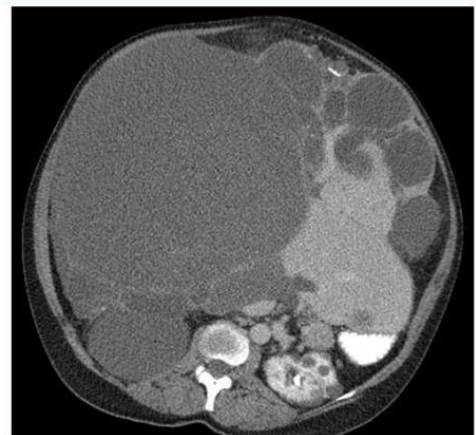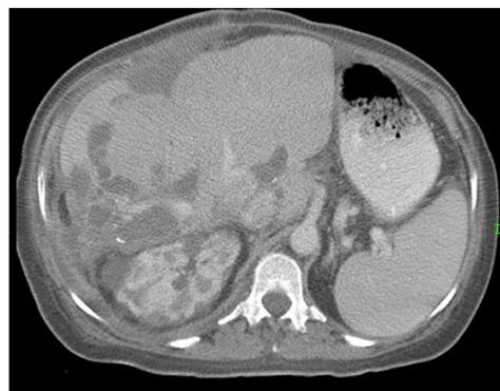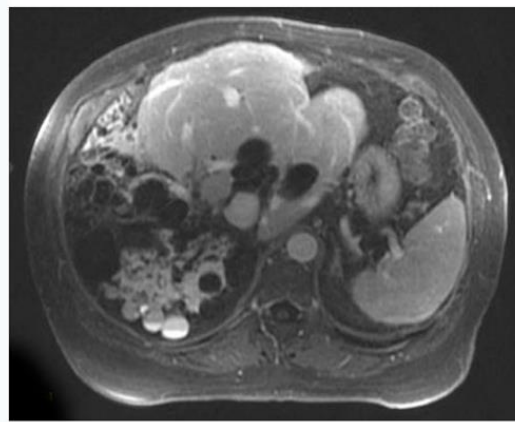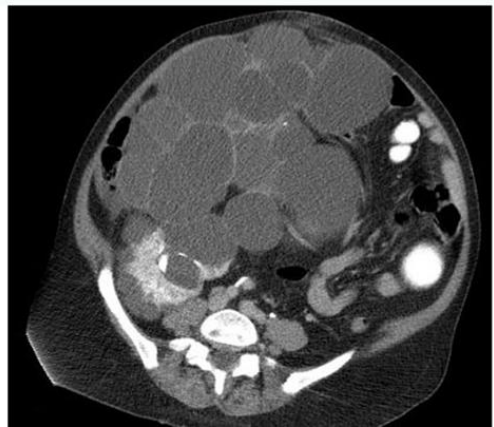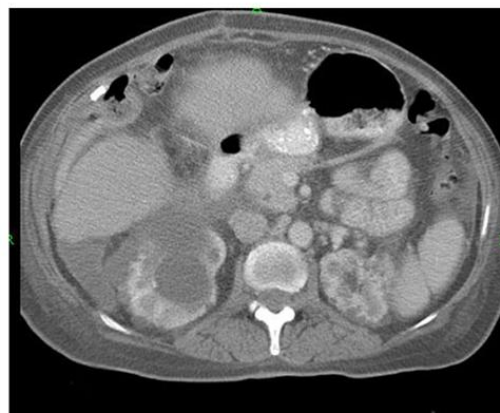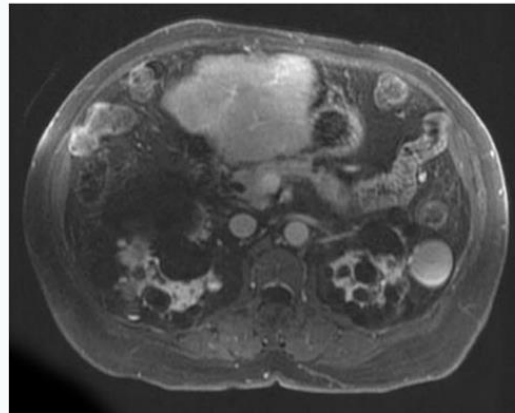

May-1998

June-1998

November-2001

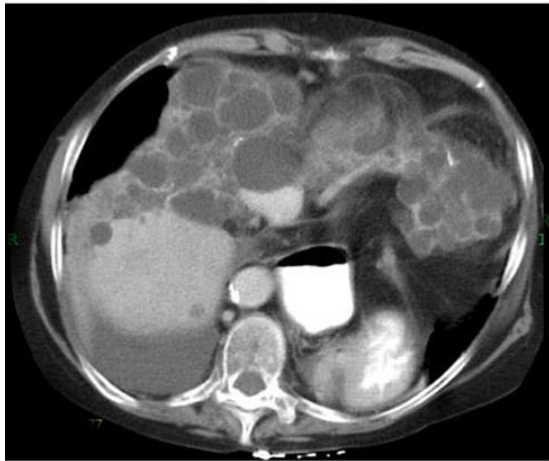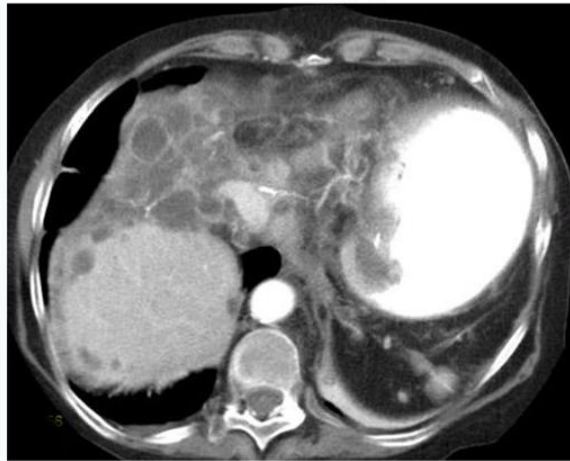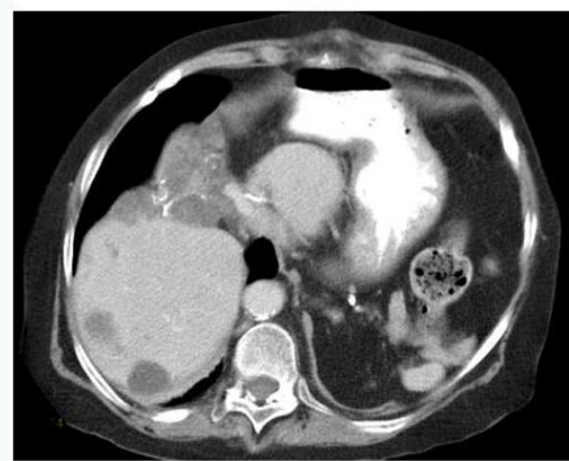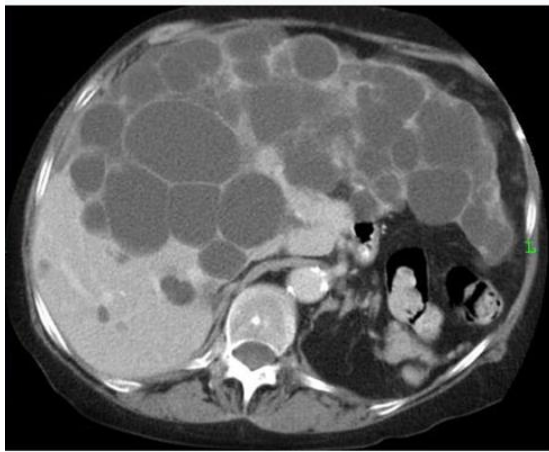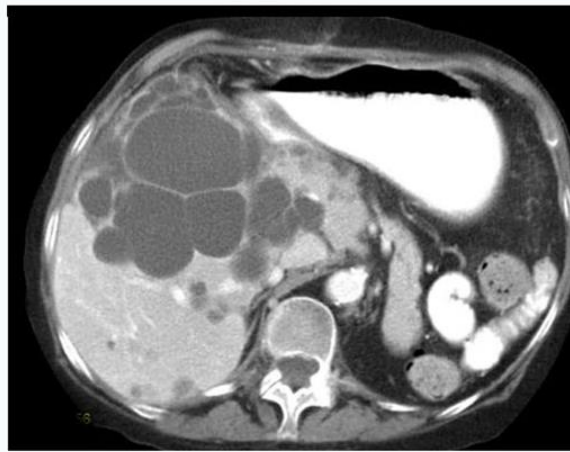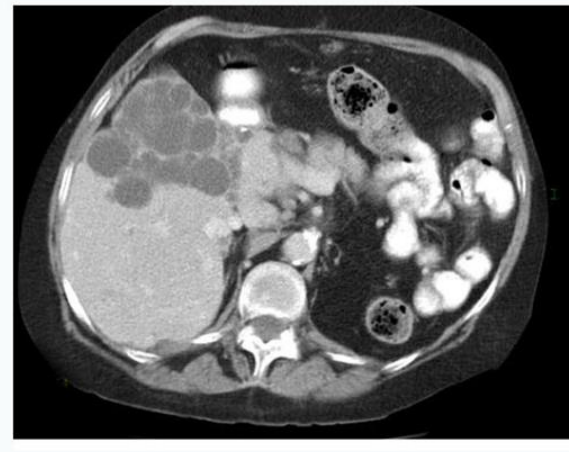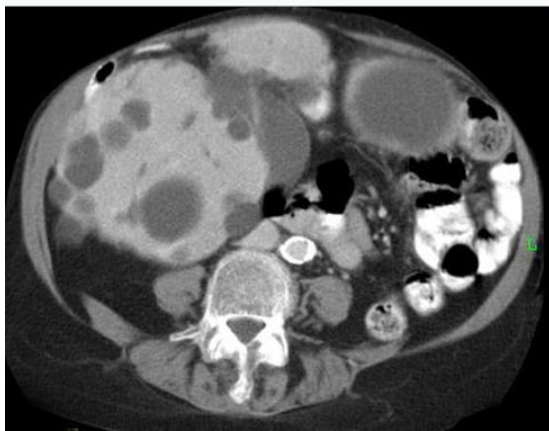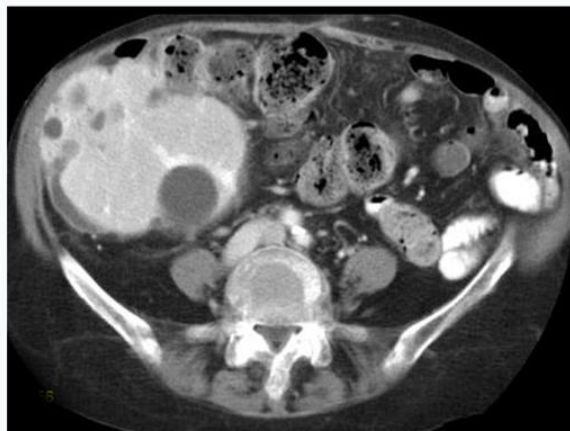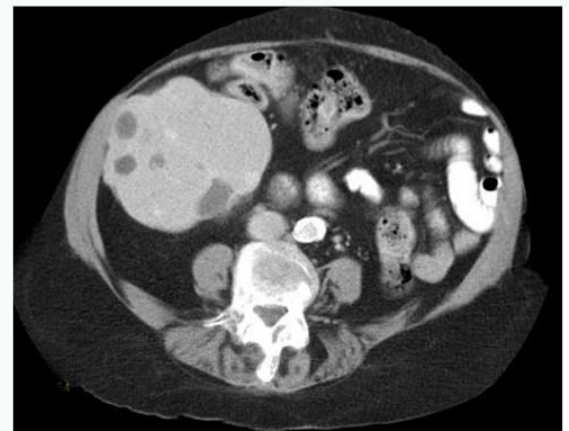

September-1986

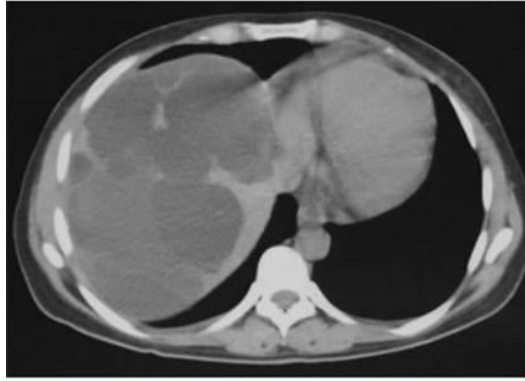

February-2013

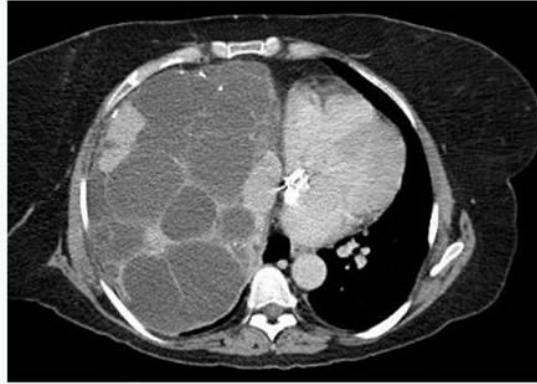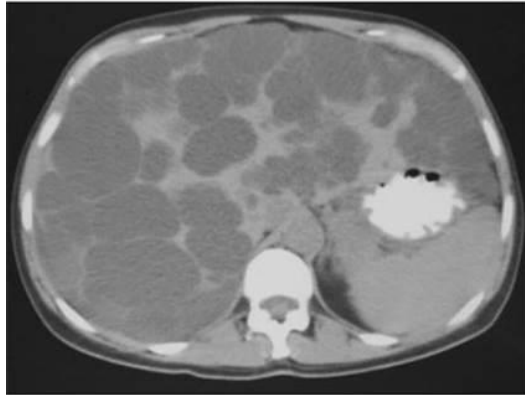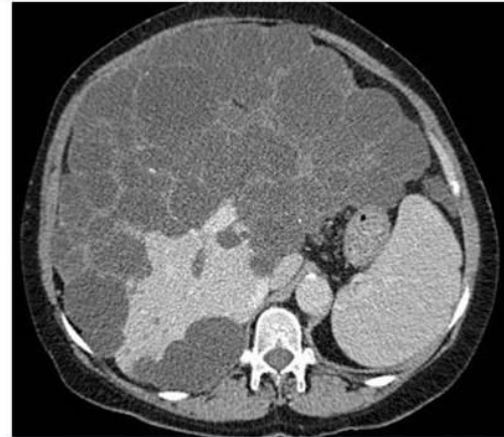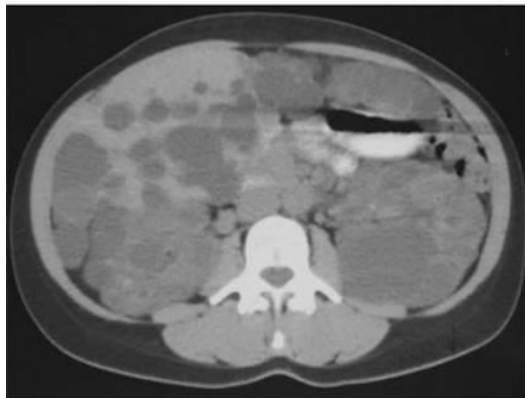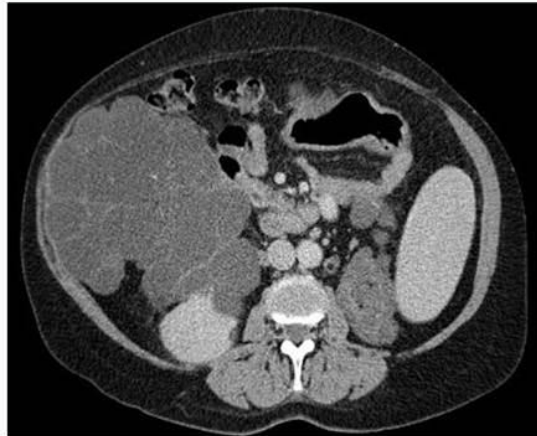



April-1988

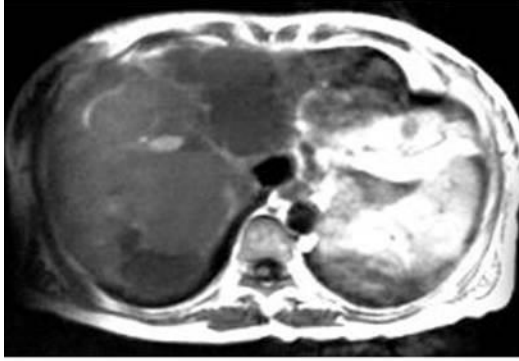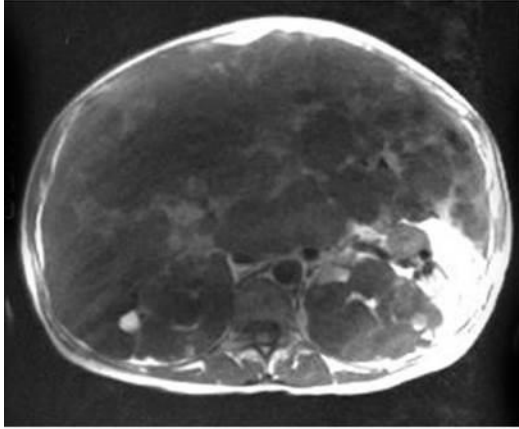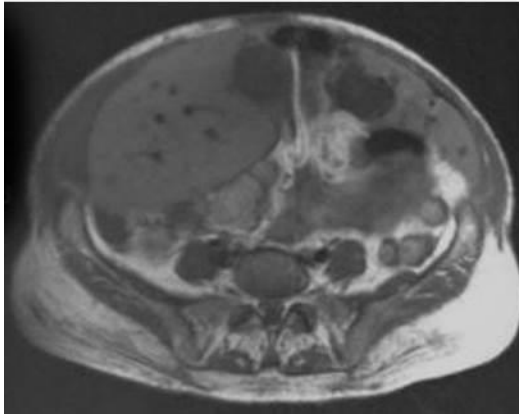

August-1999

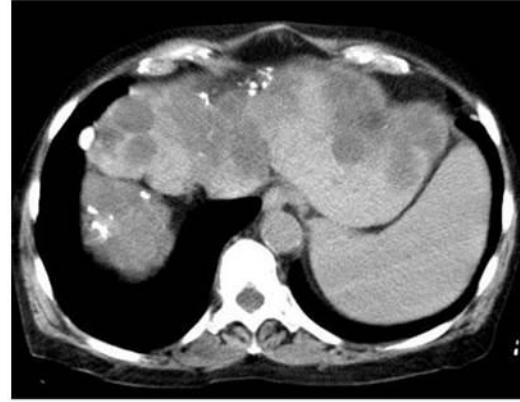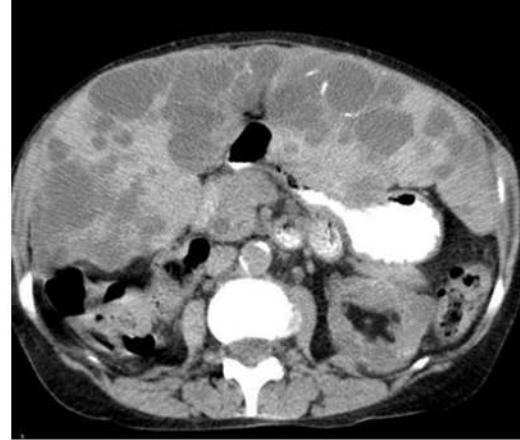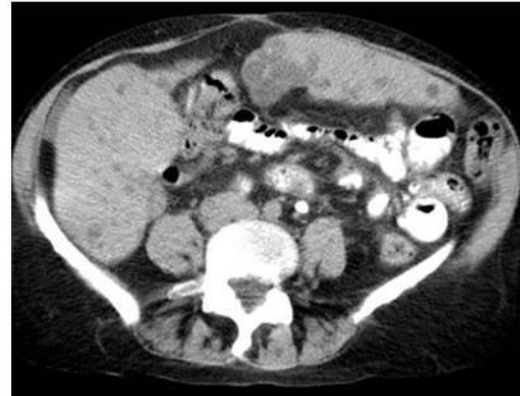

April-1991

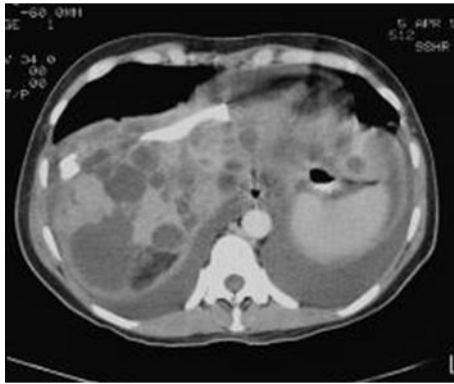

December-1993

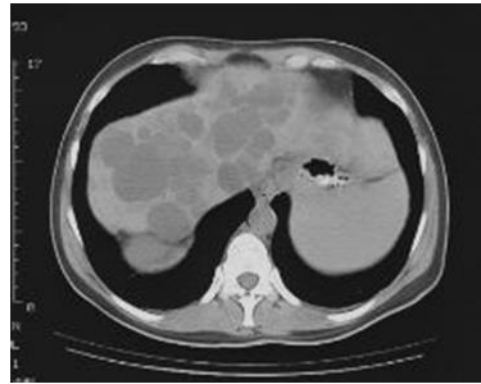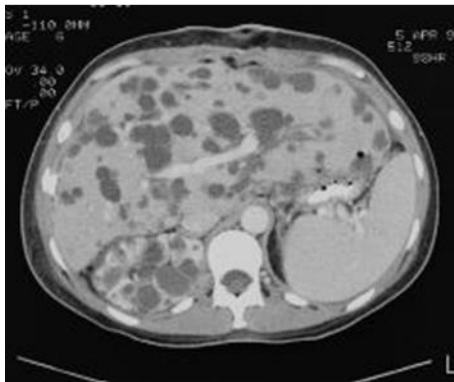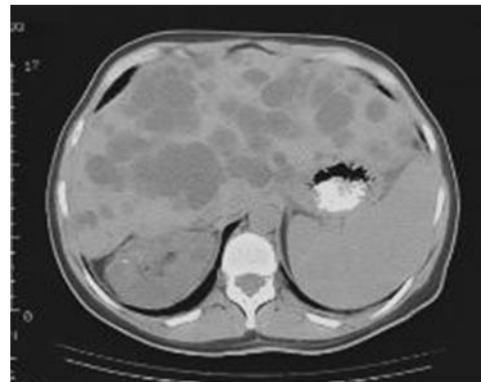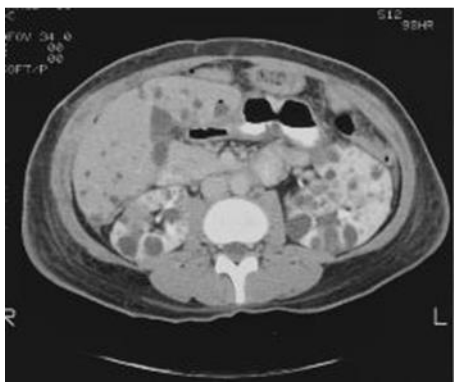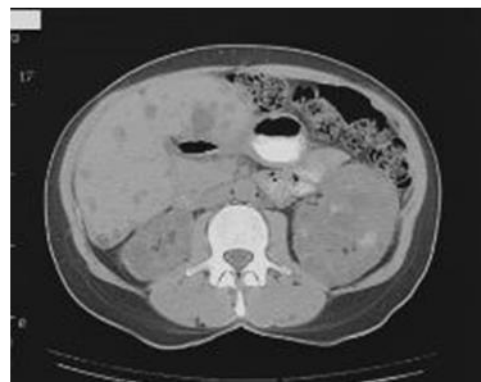

March-1992

October-2013

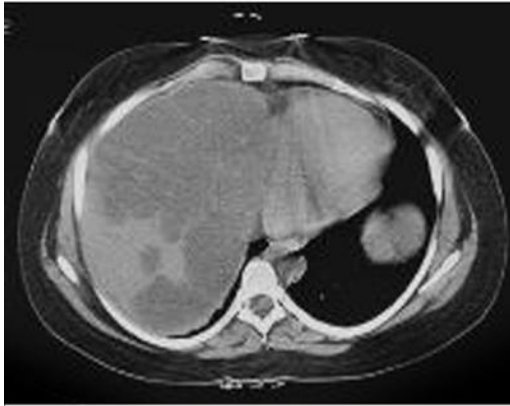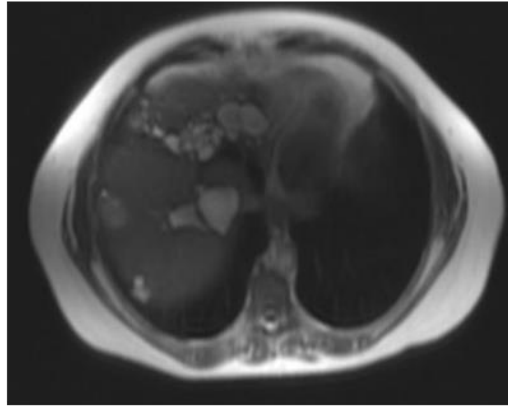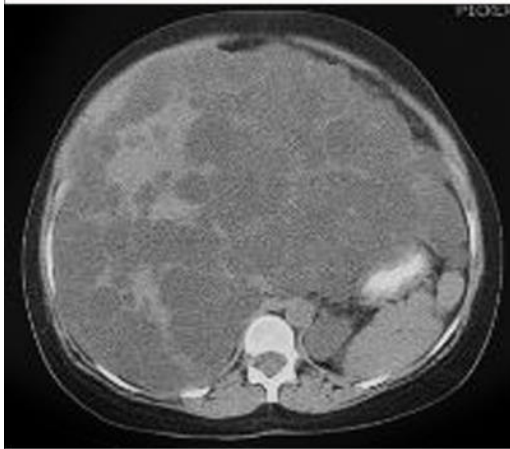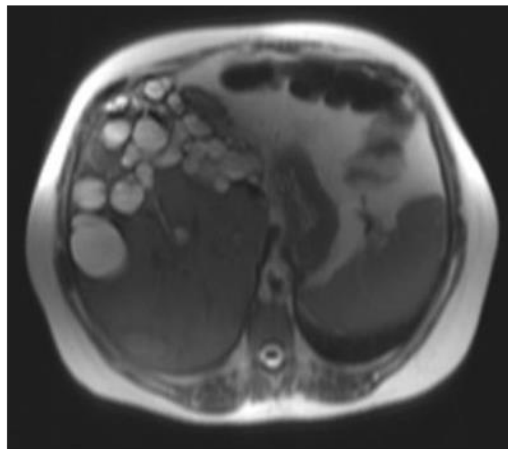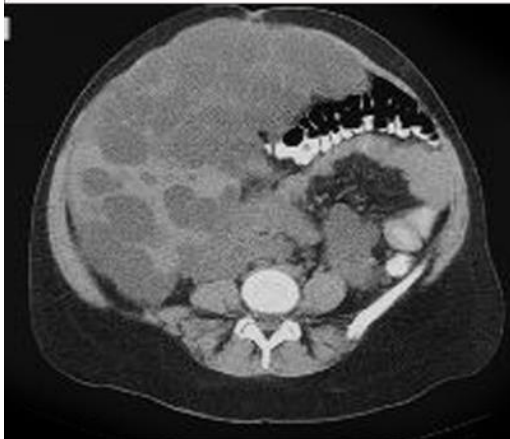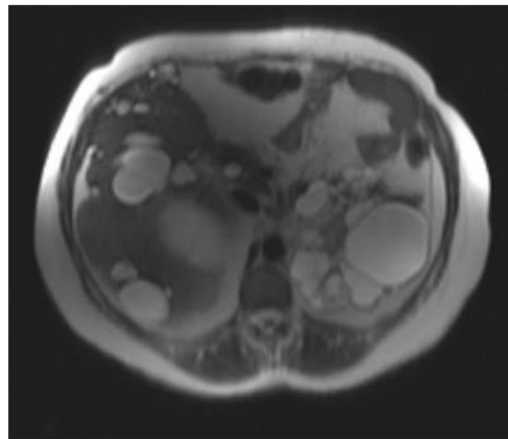

July-2010

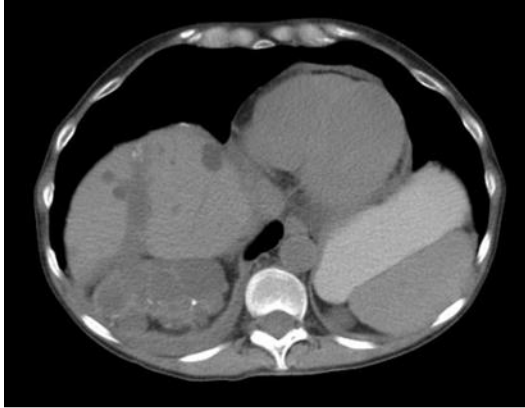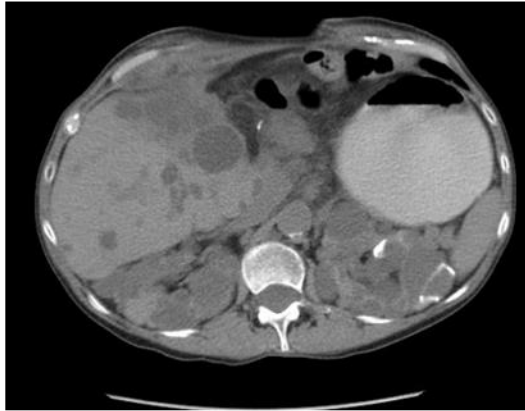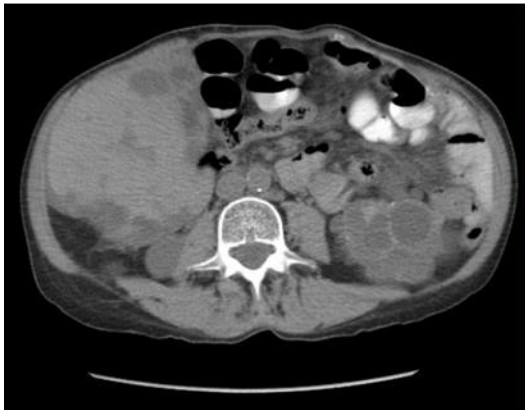

November-2011

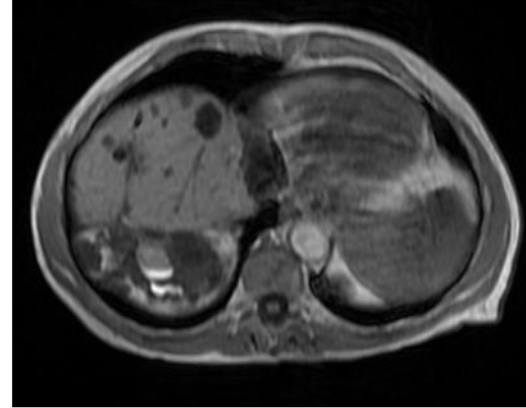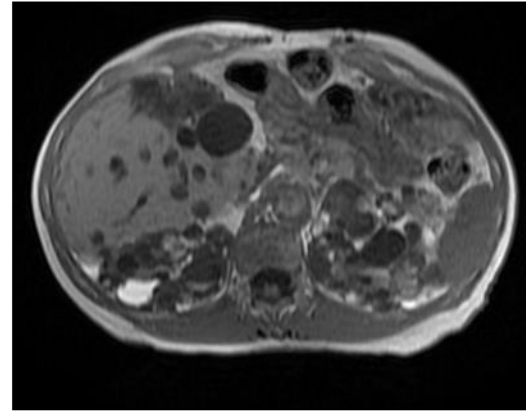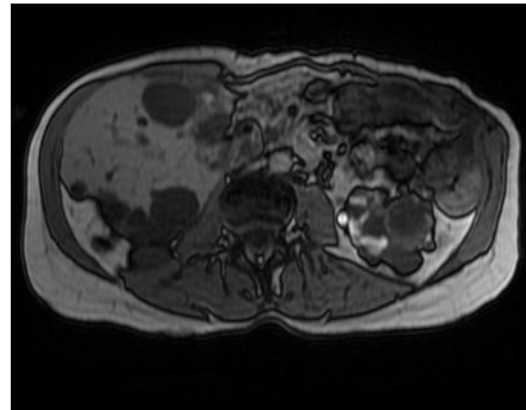

July-2011

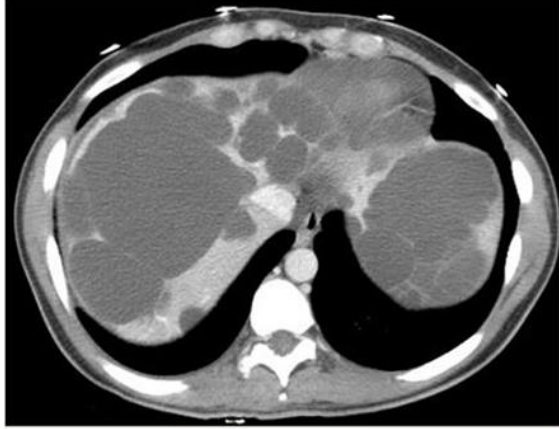

February-2015

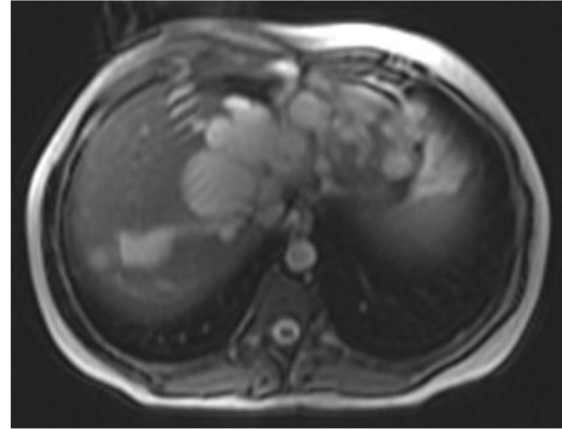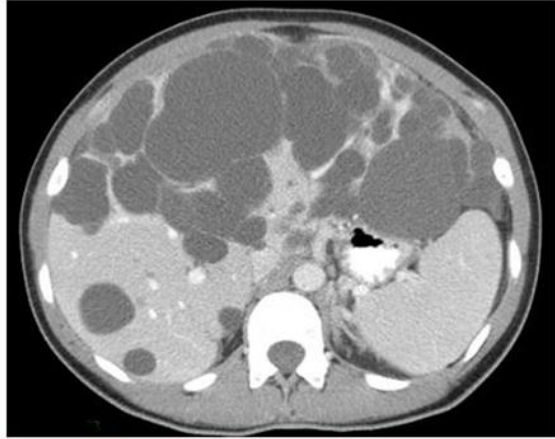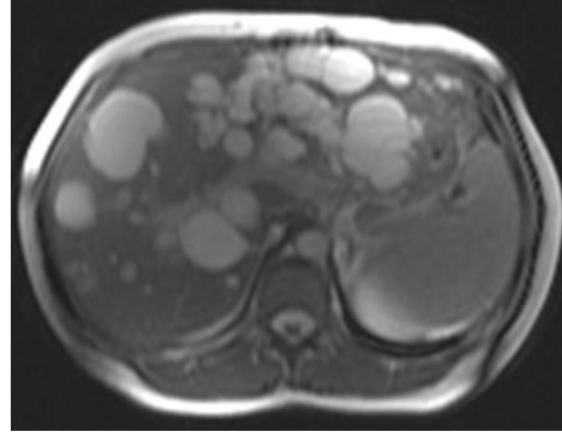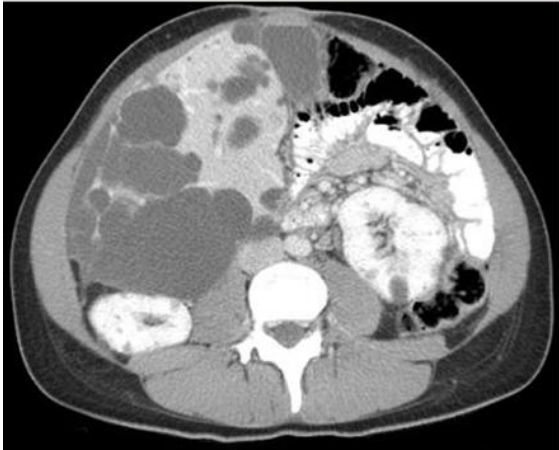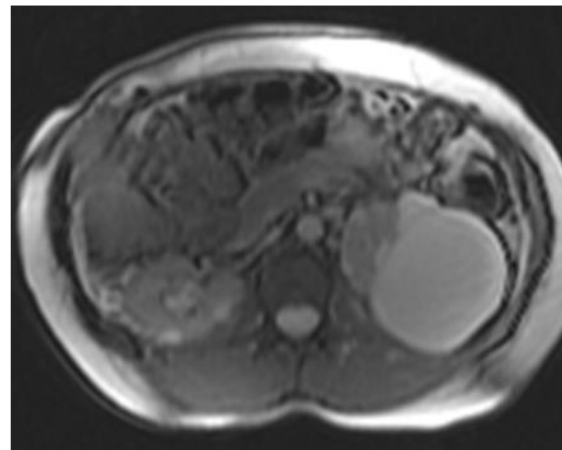

October-2013

July-2014

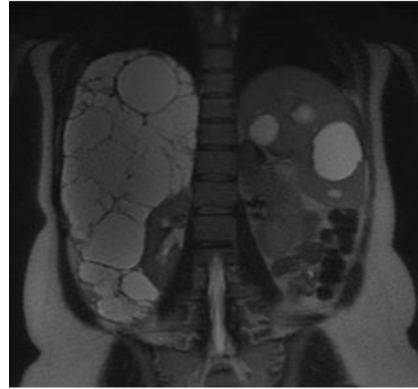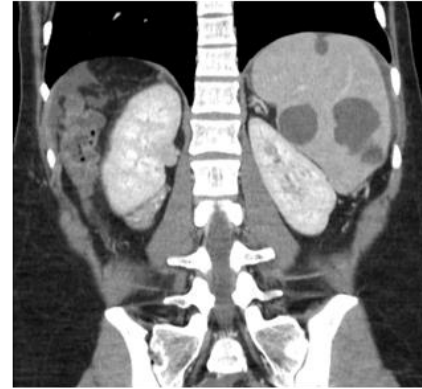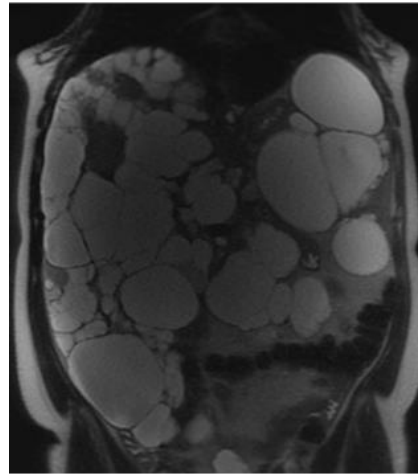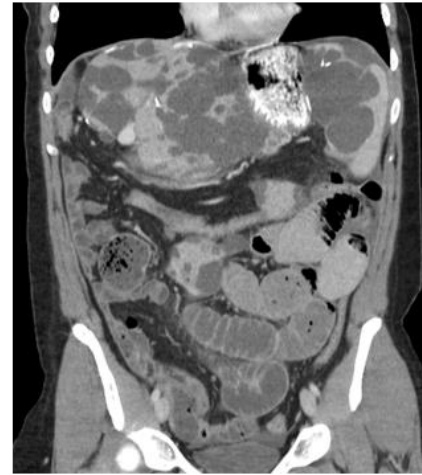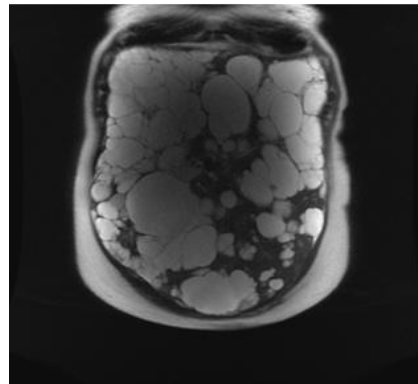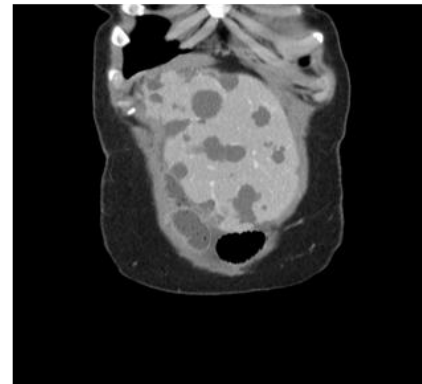

March-2009

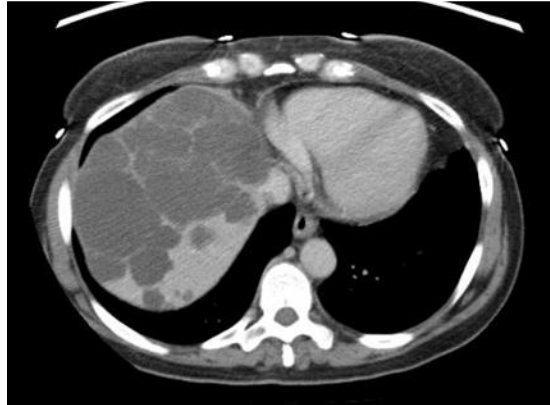

May-2015

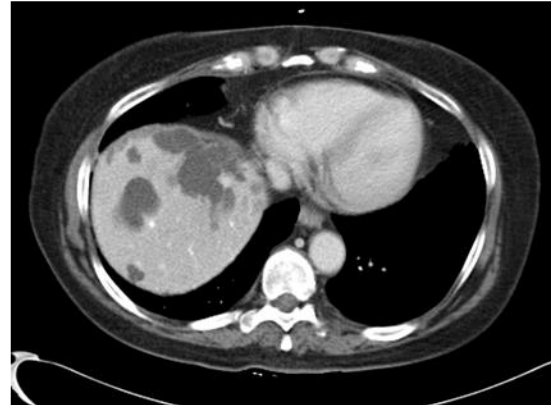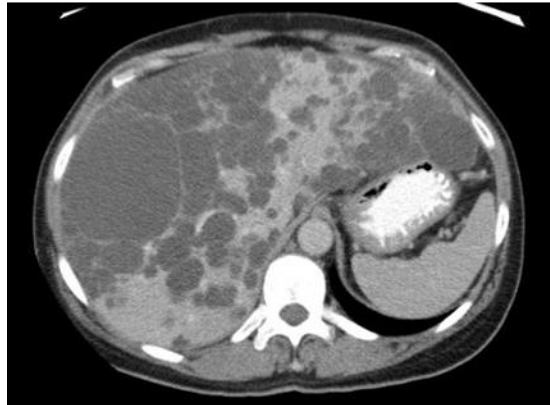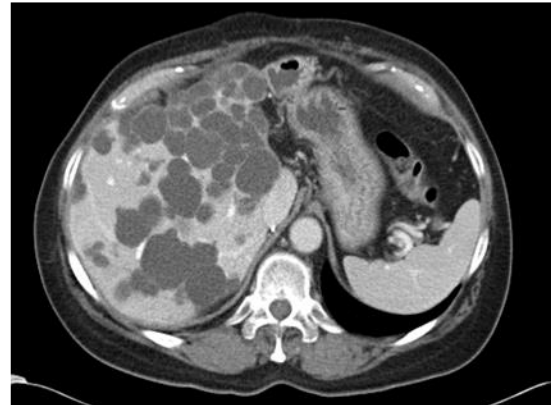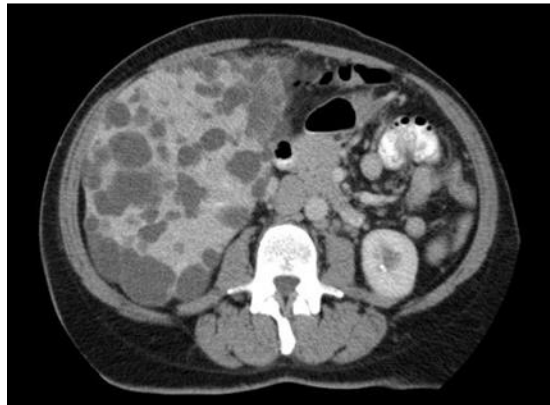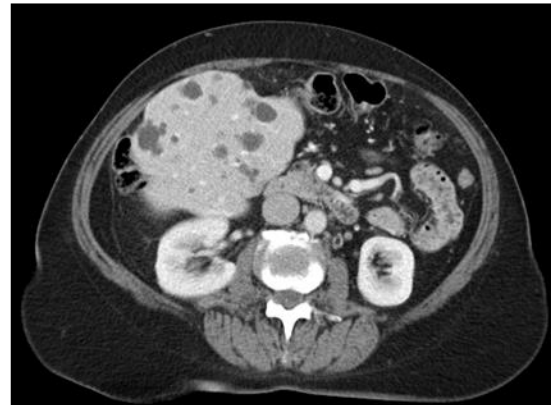

April-1989

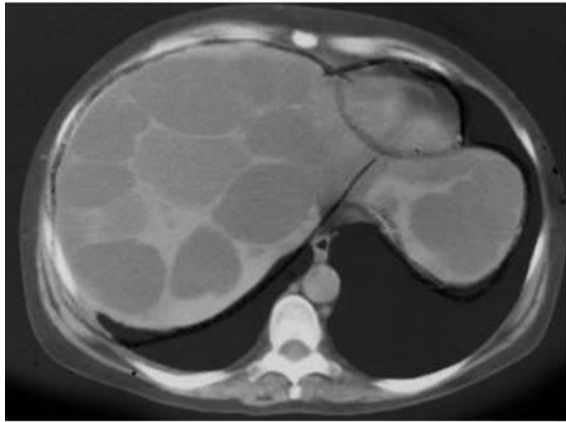

August-2009

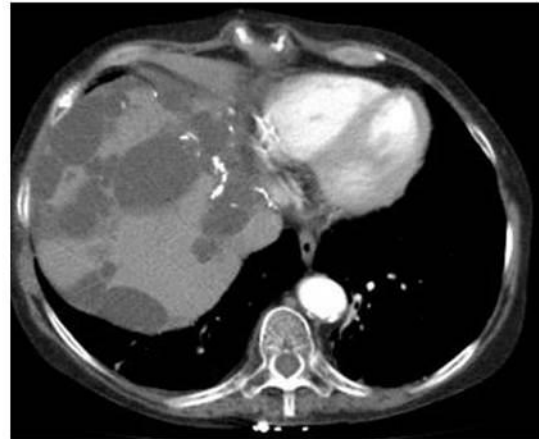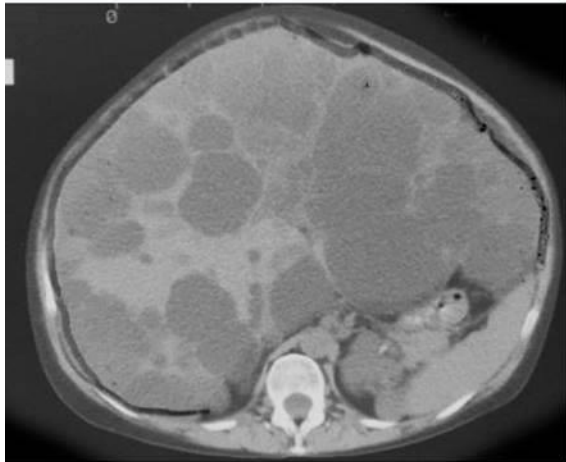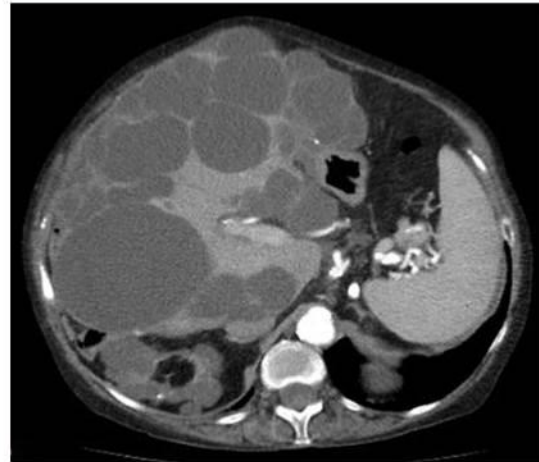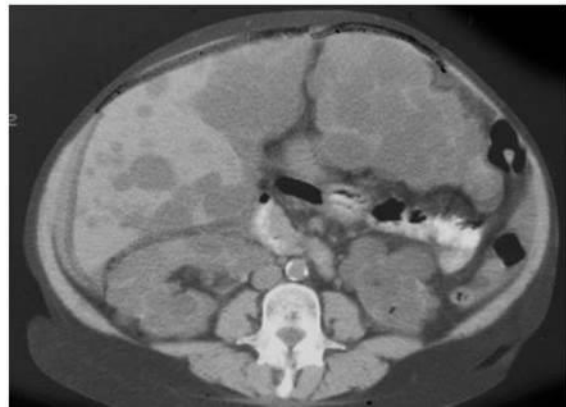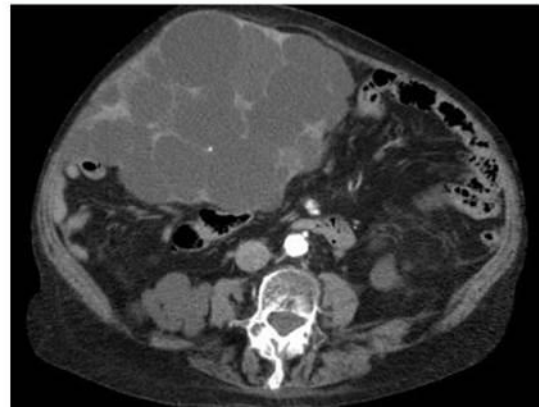



April-1992

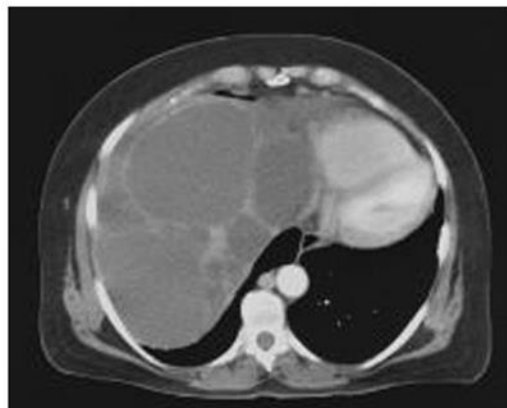

December-2011

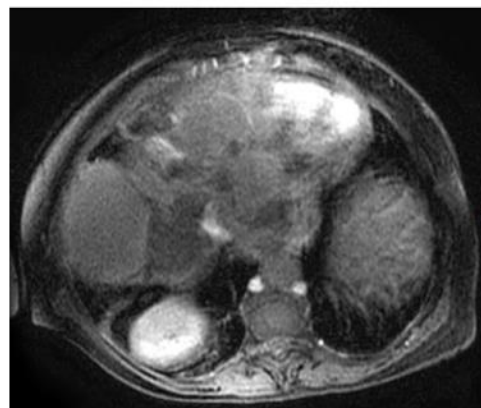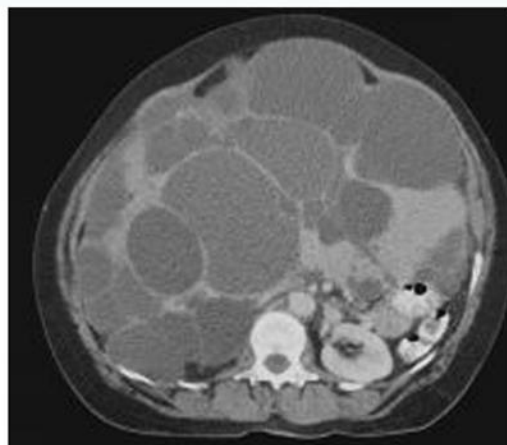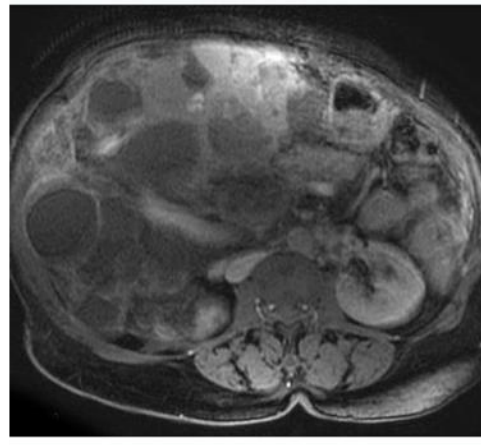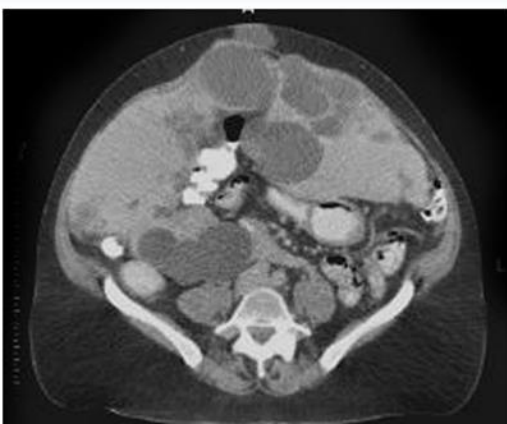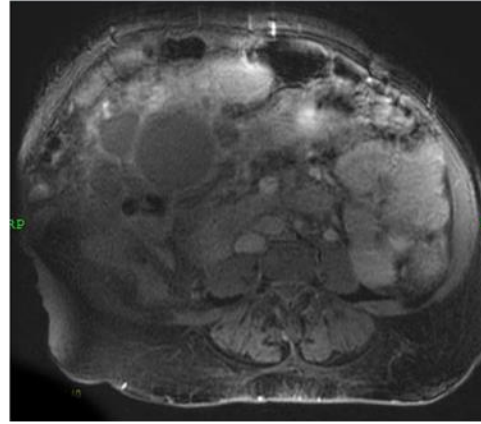

October-2005

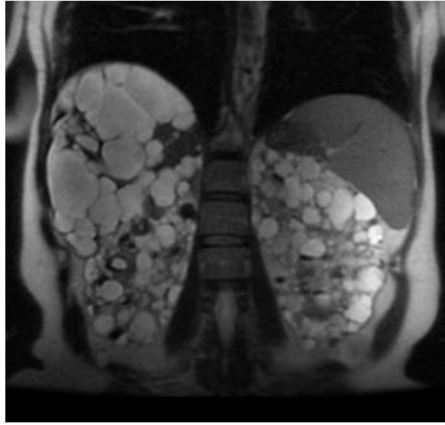

June-2015

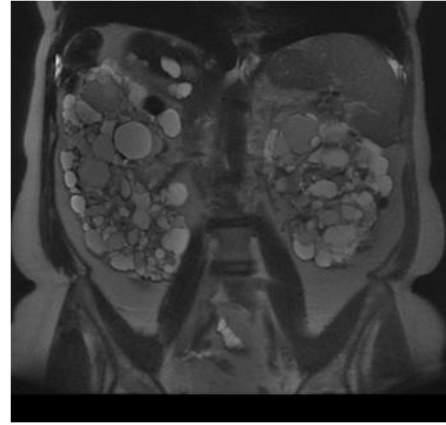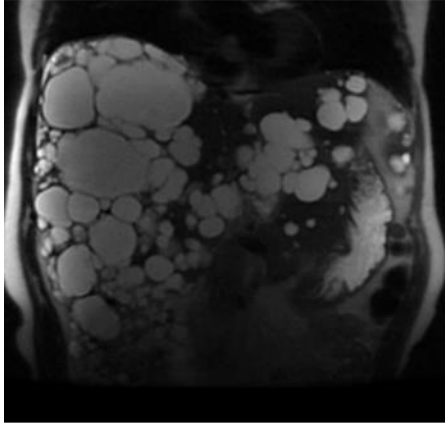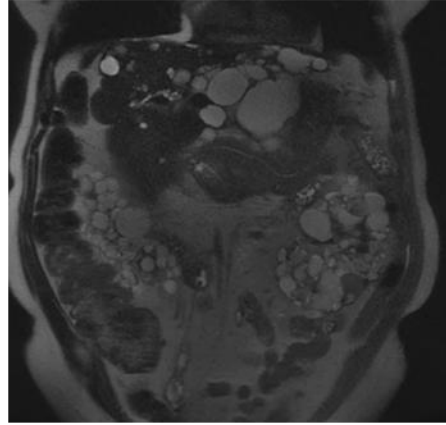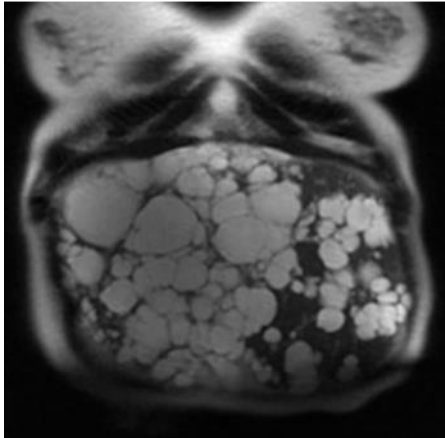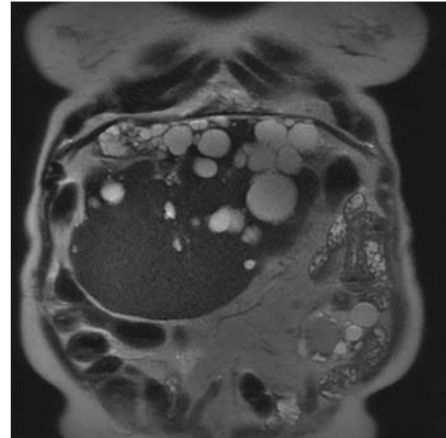

February-2004

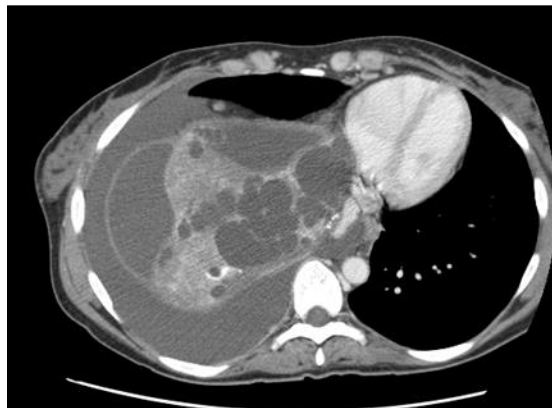

January-2012

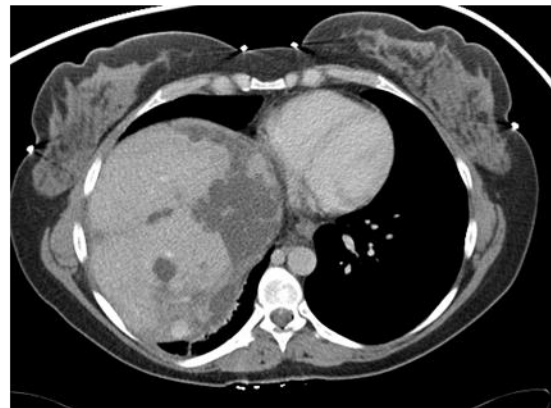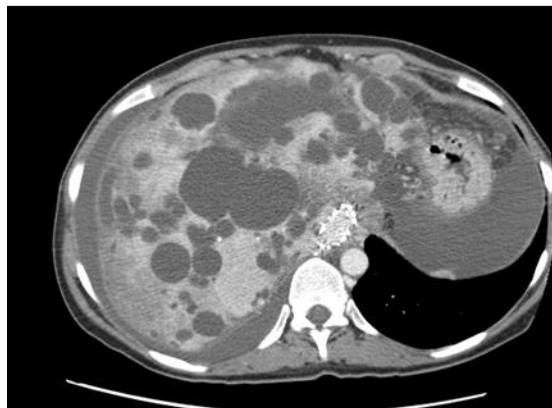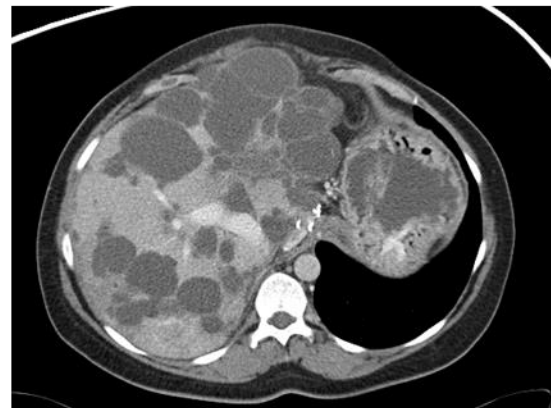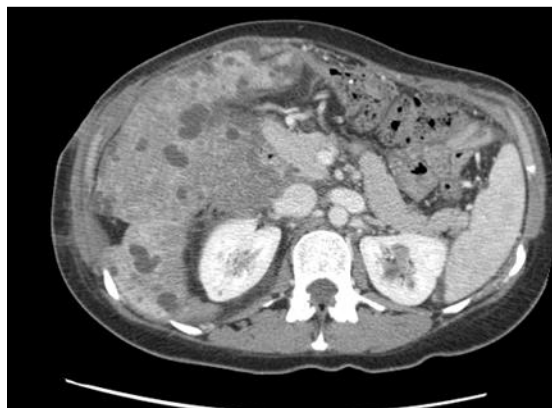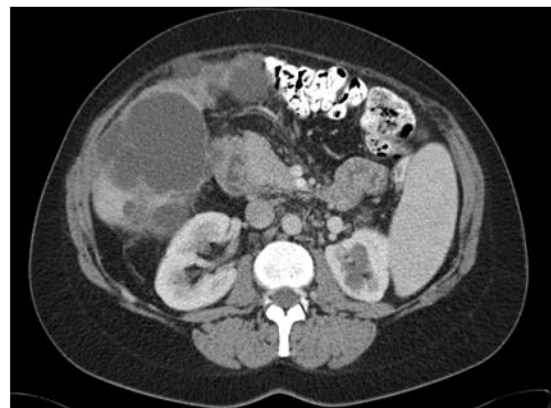

September-2000

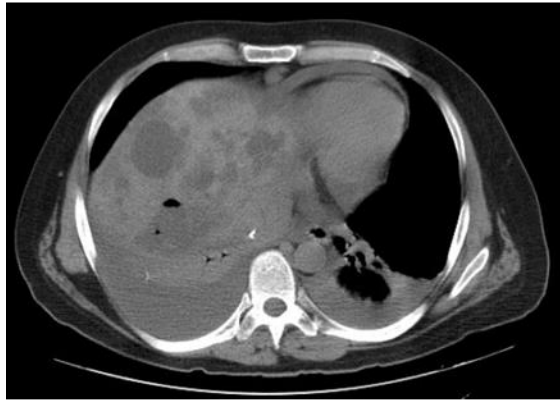

February-2007

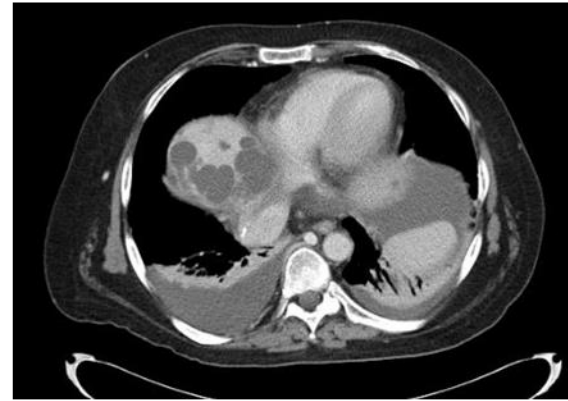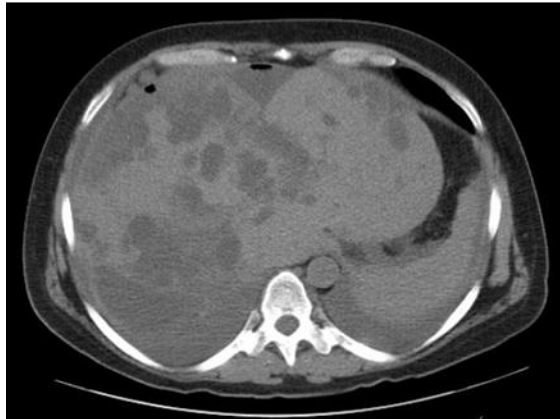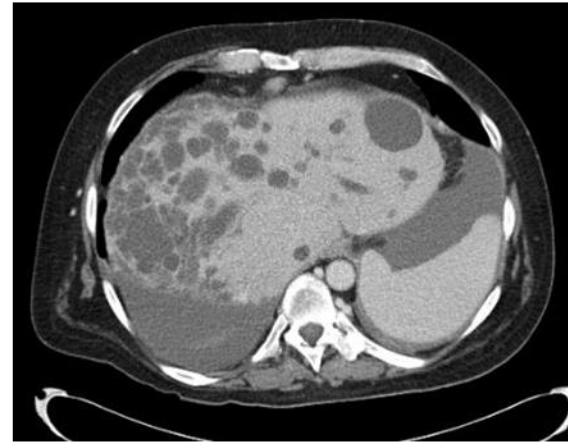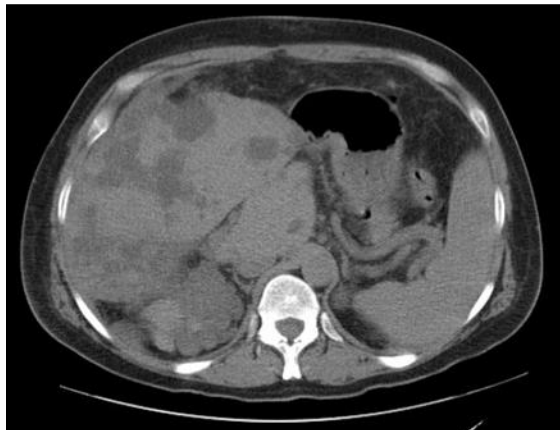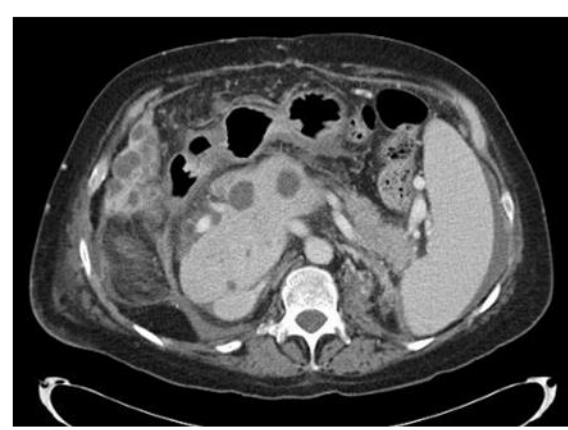

January-2007

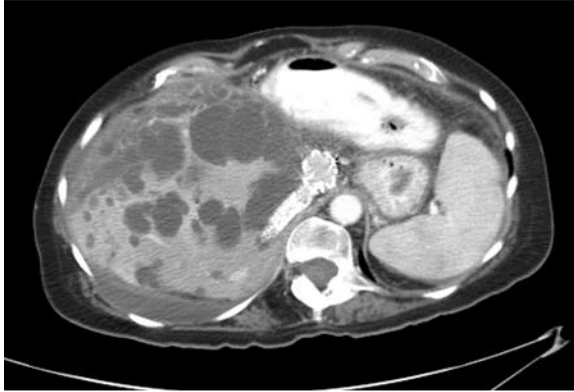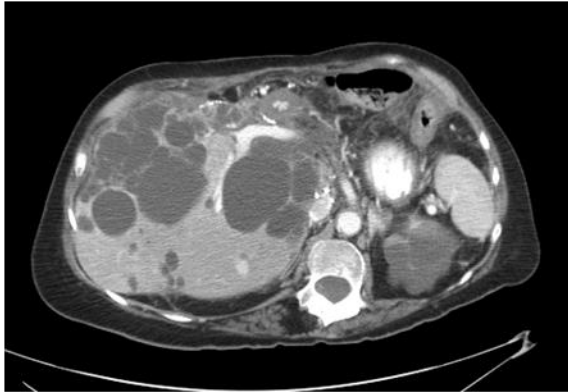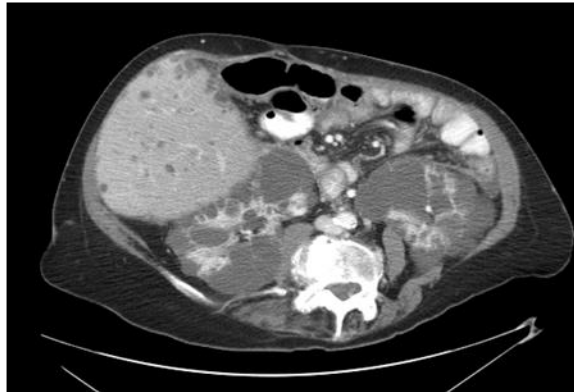

August-2013

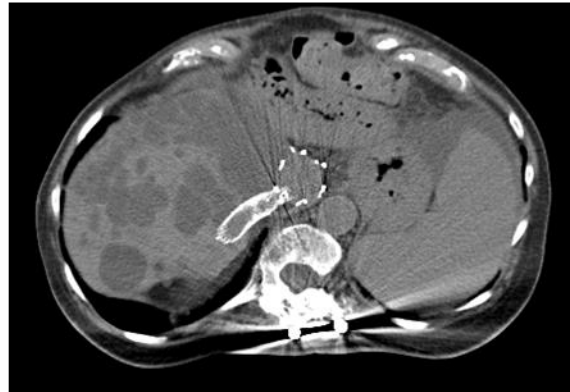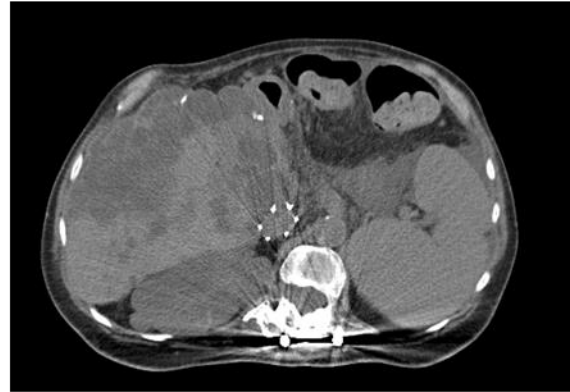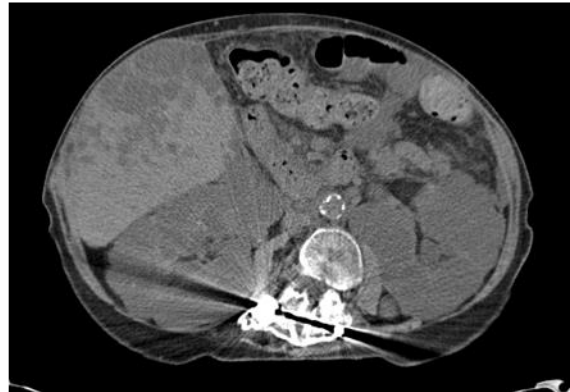

October-1996

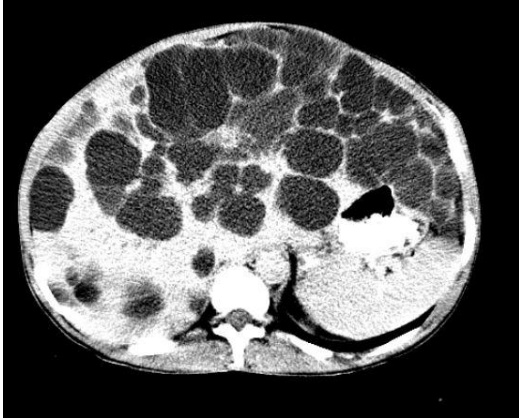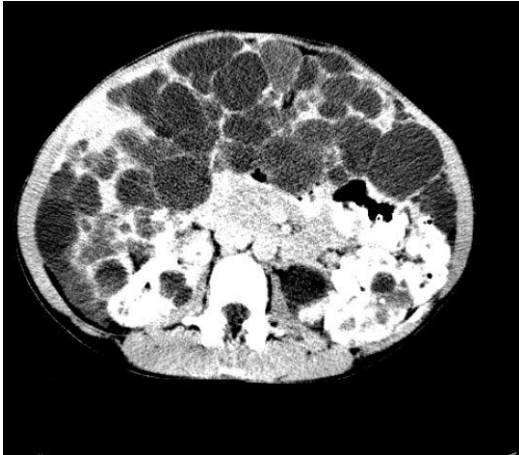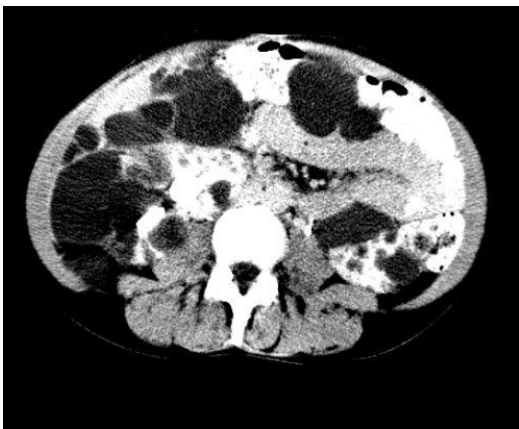

February-1997

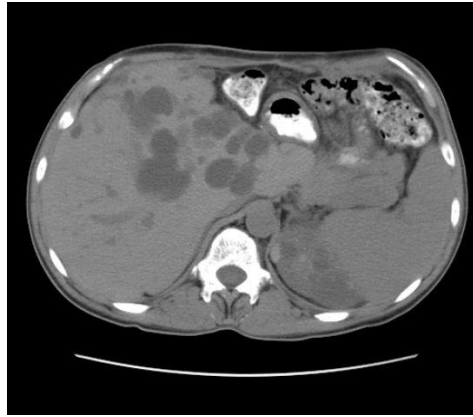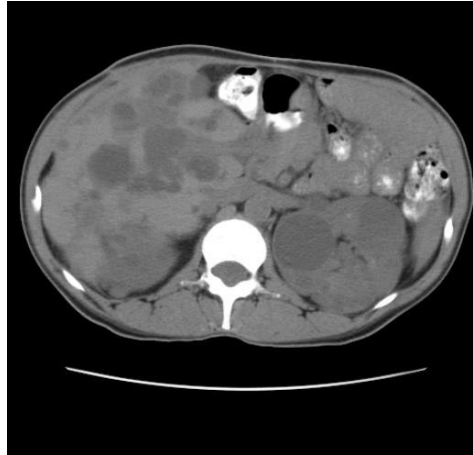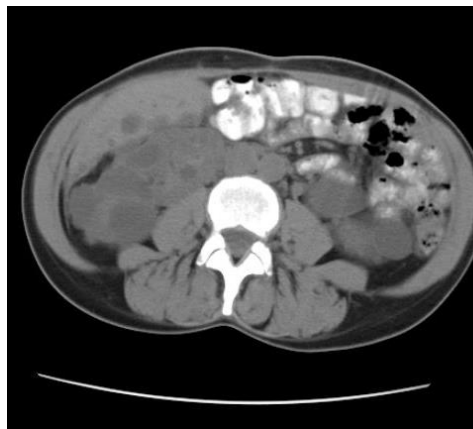

May-2005

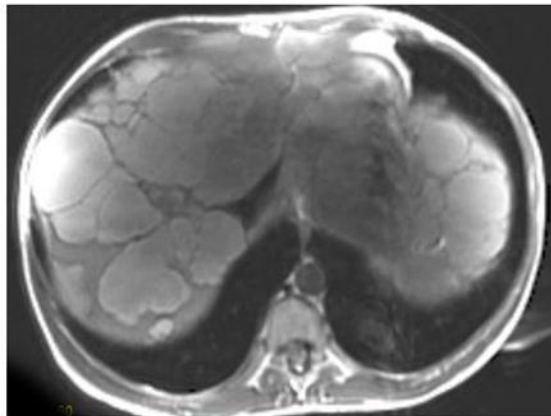

July-2014

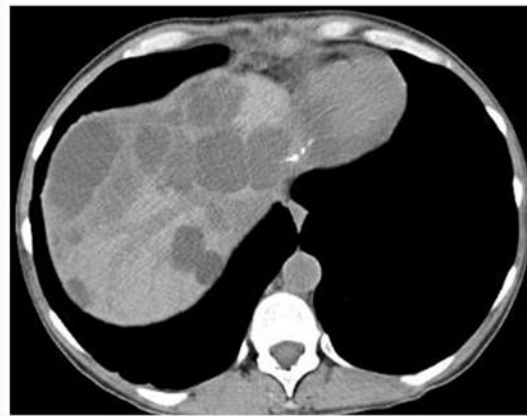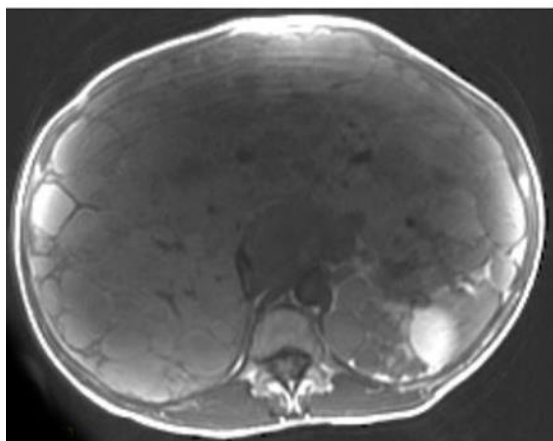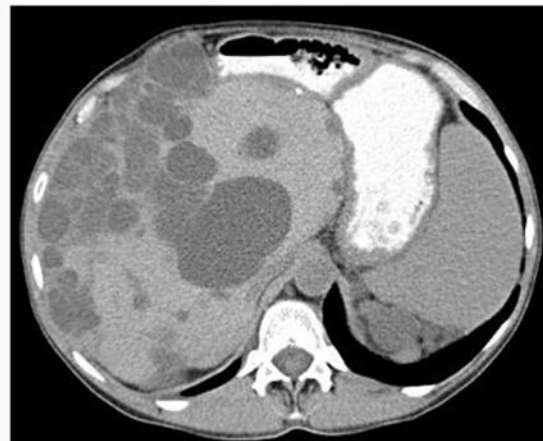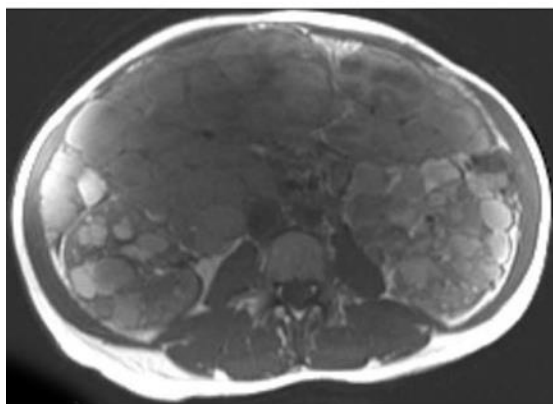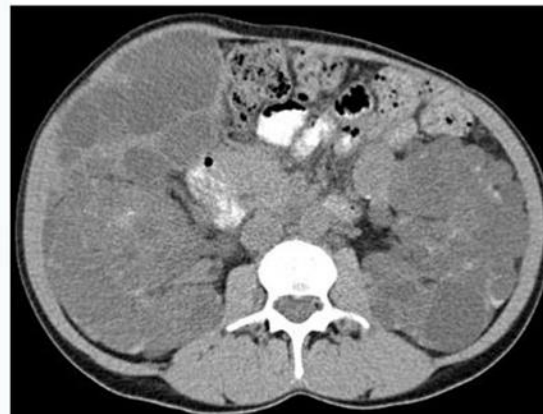

July-1997

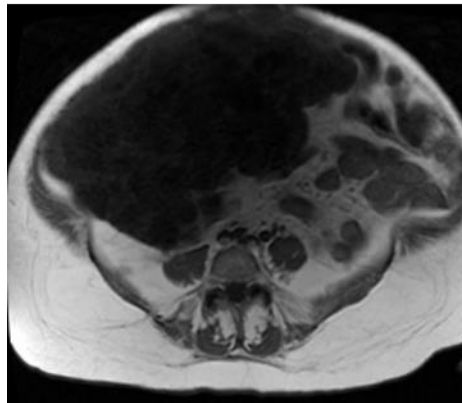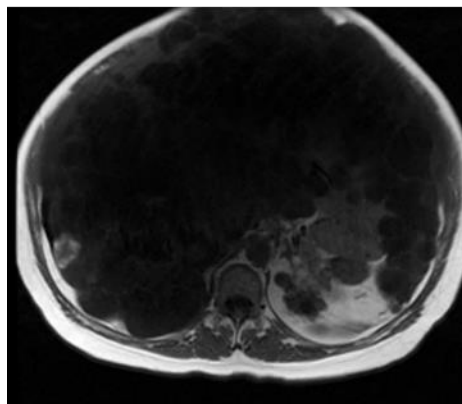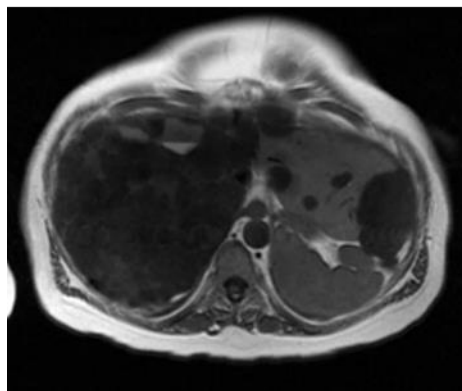



January-2005

August-2014

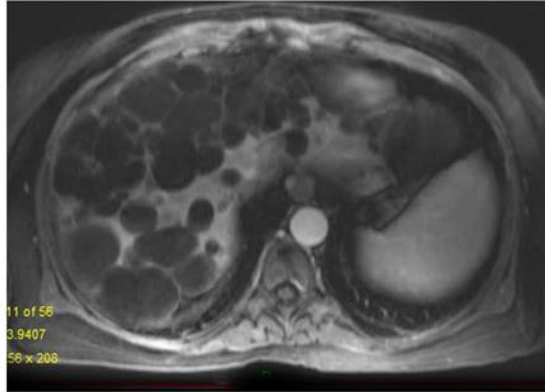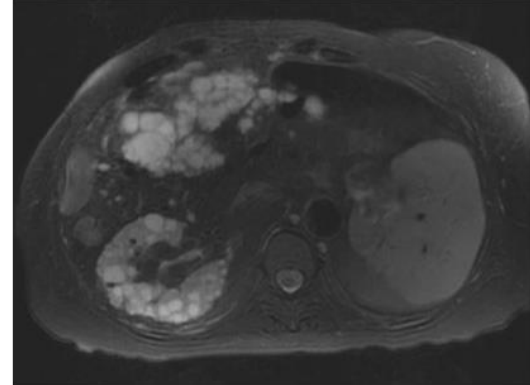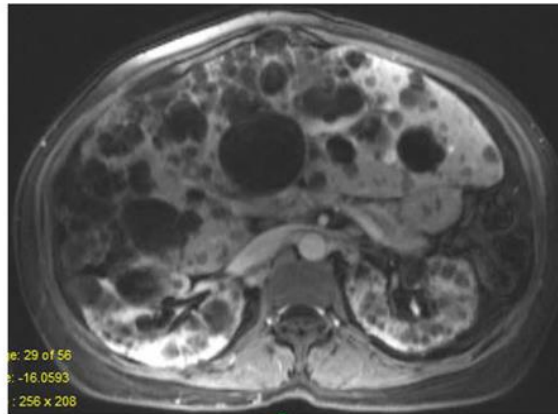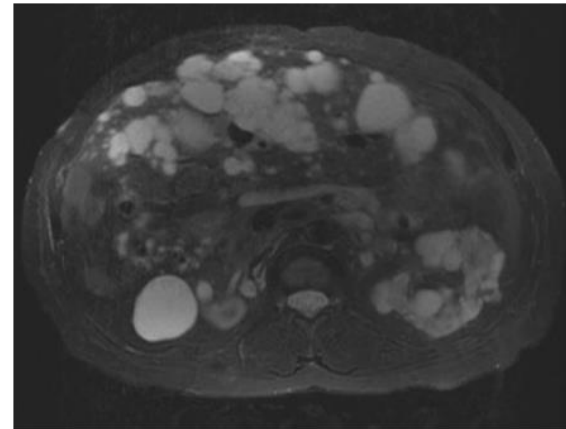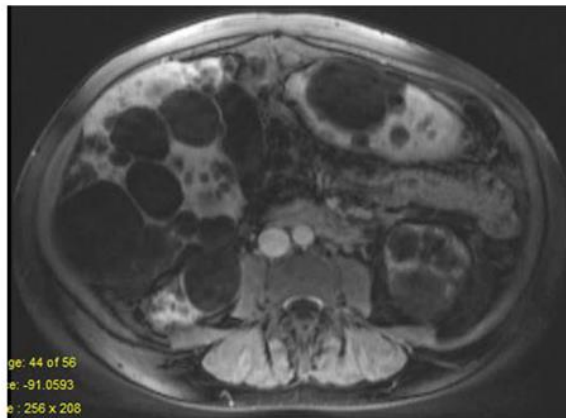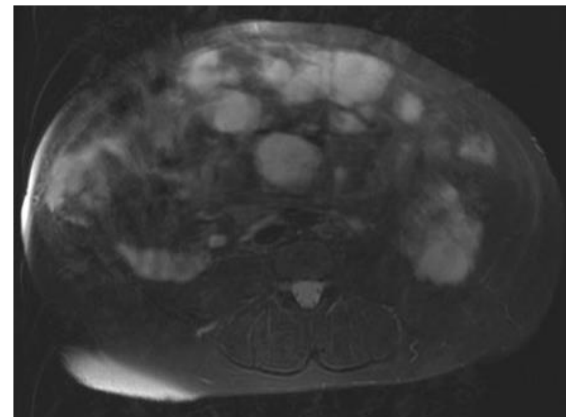

**July-2005**

**April-2015**

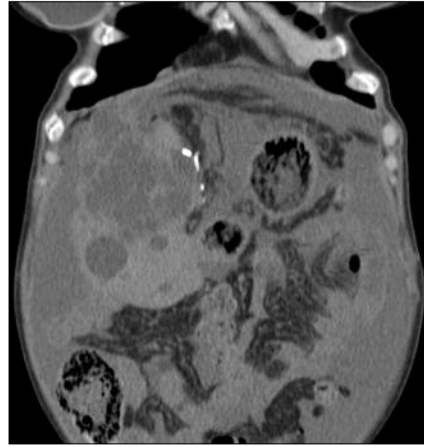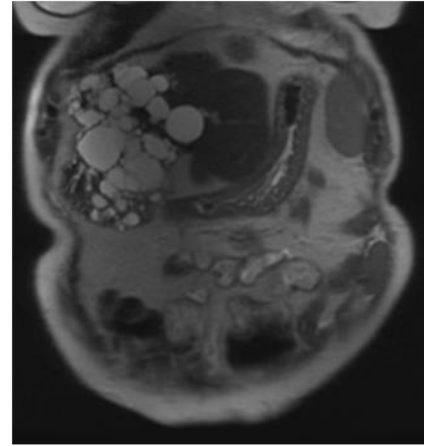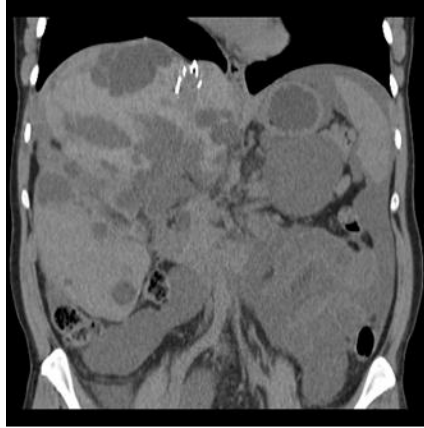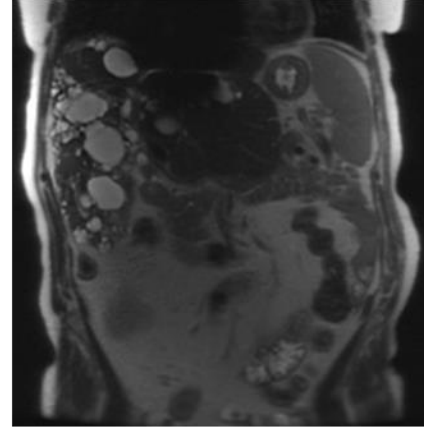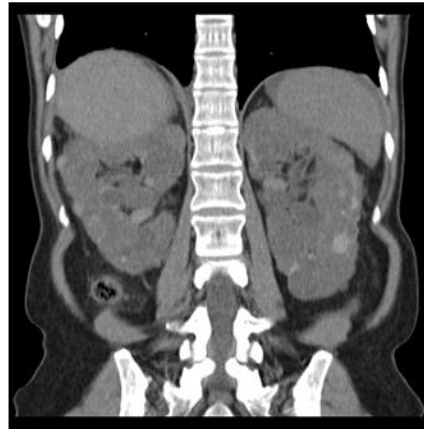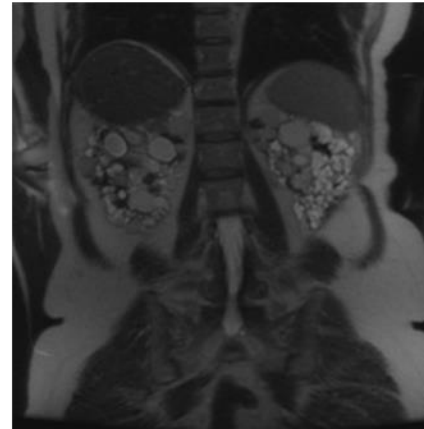

**July-2012**

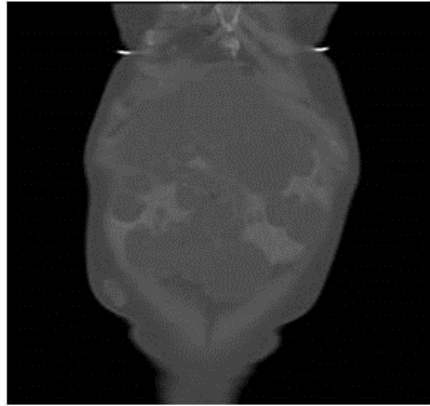

**May-2015**

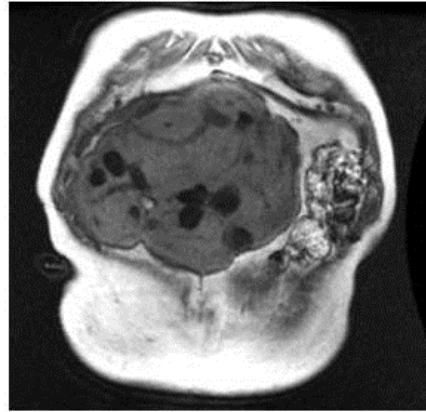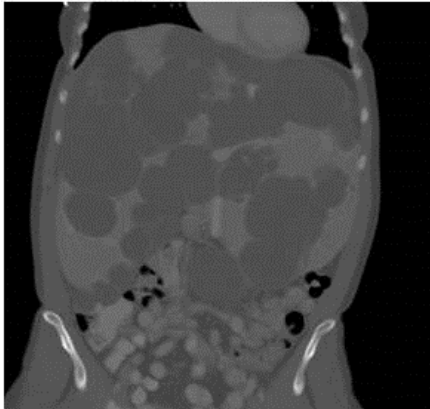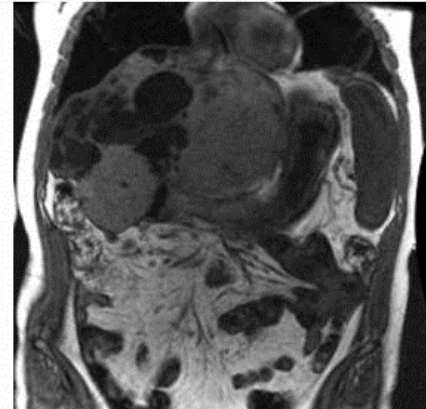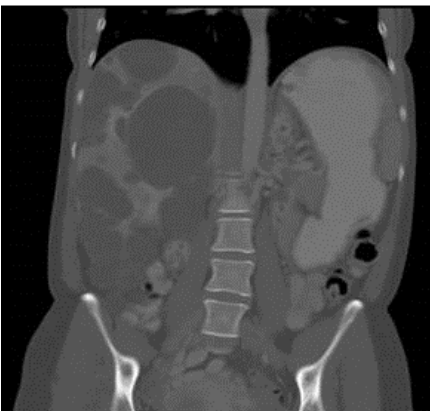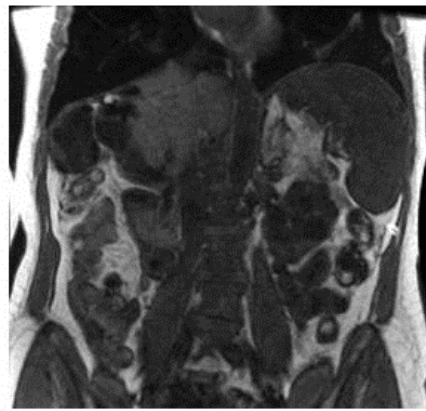

December-2013

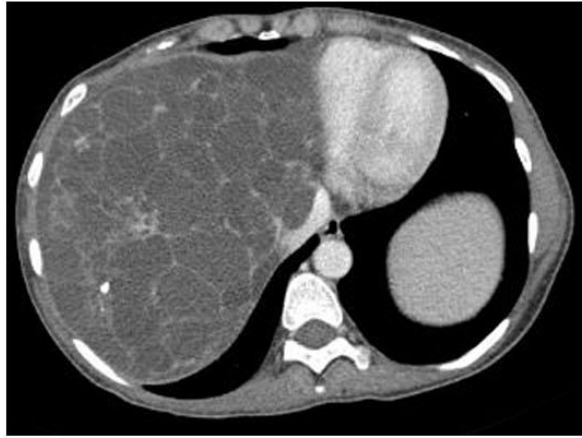

March-2014

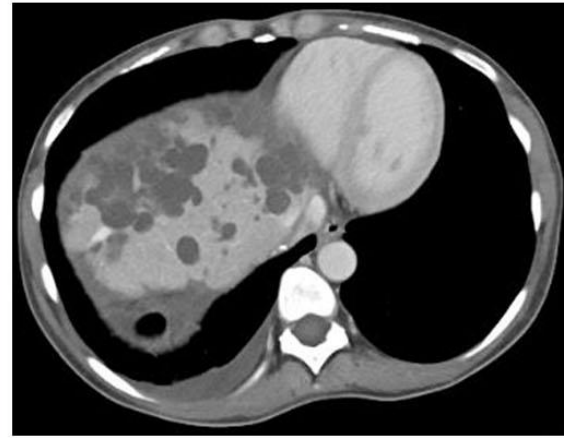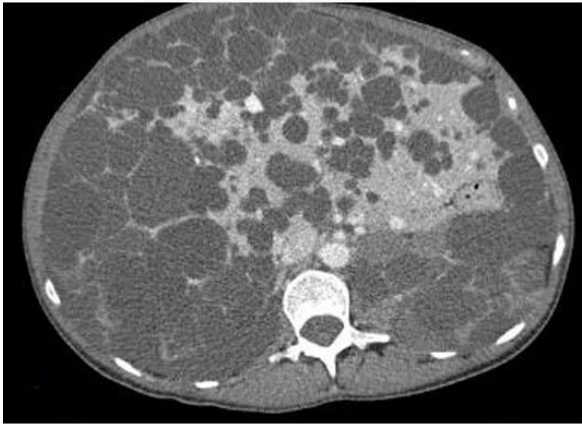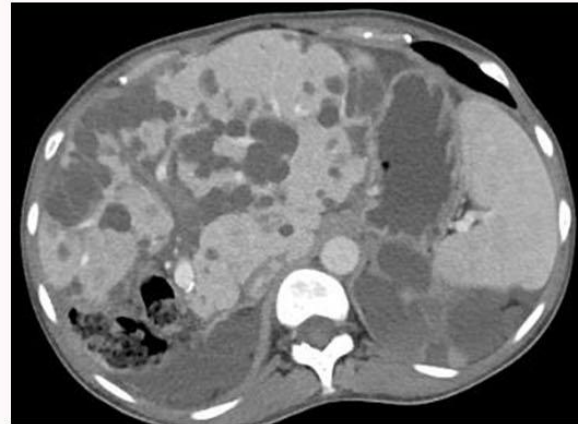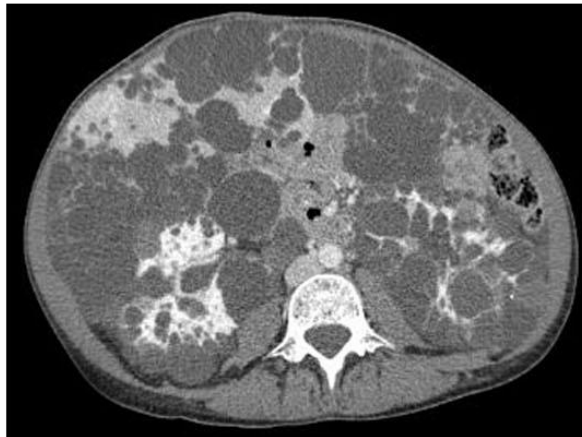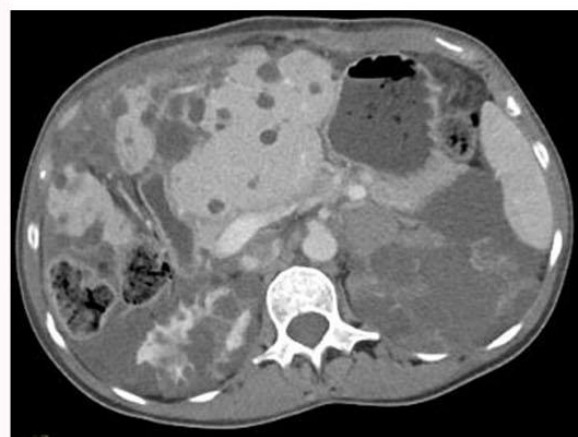

February-1990

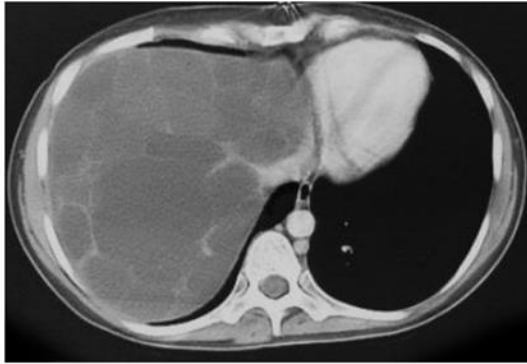

May-2015

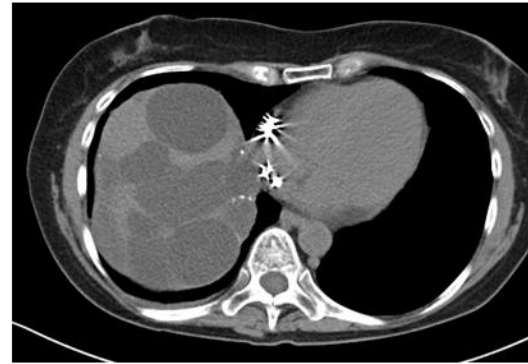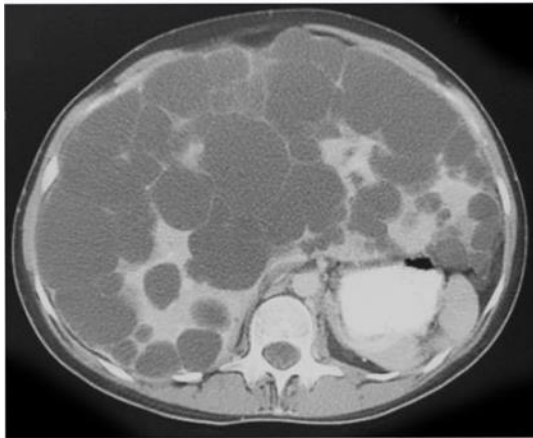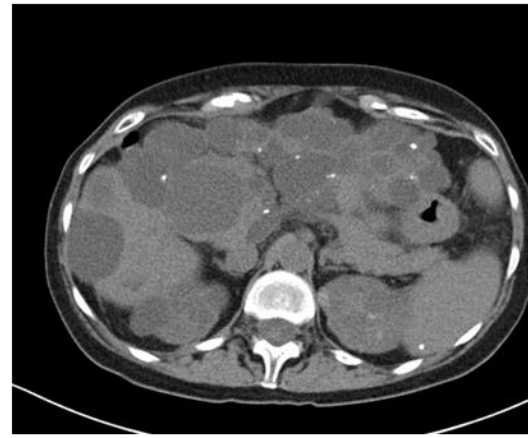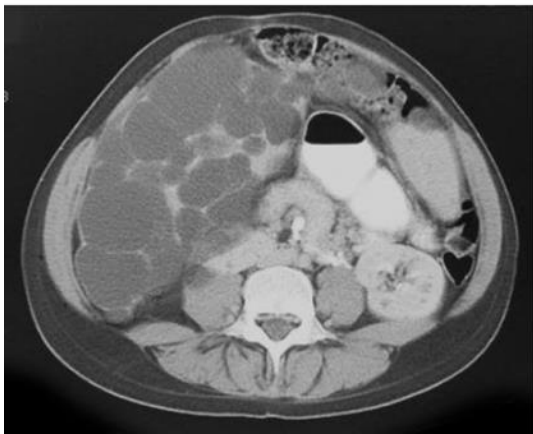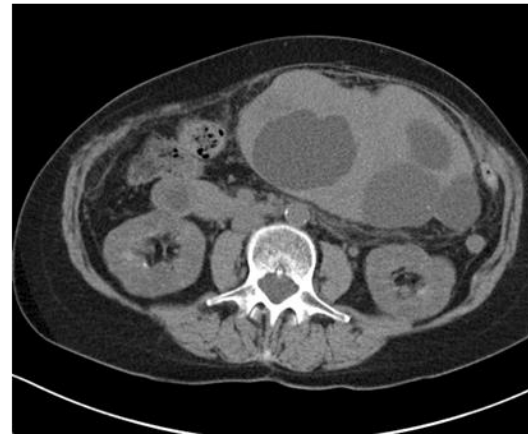

**May-1998**

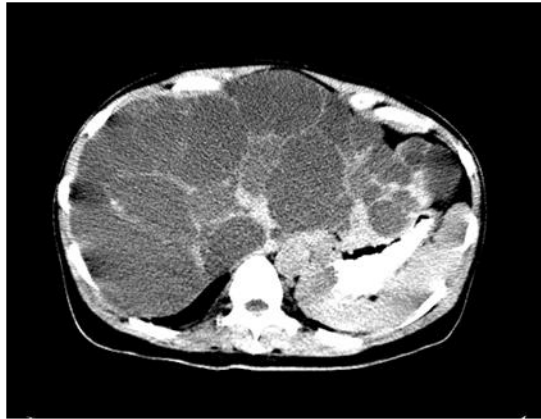

**August-2011**

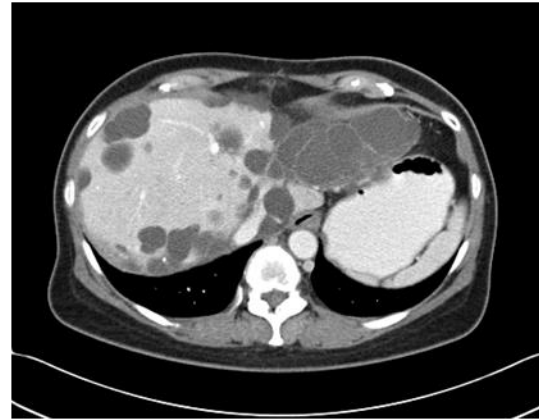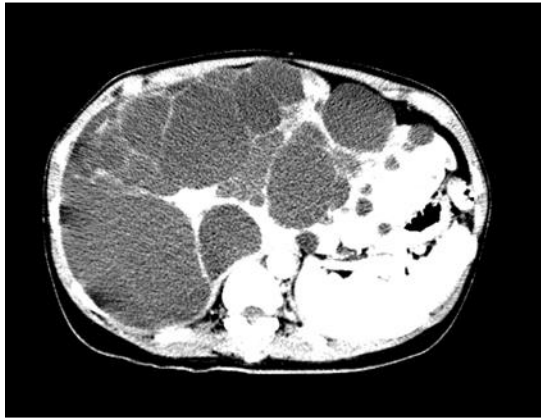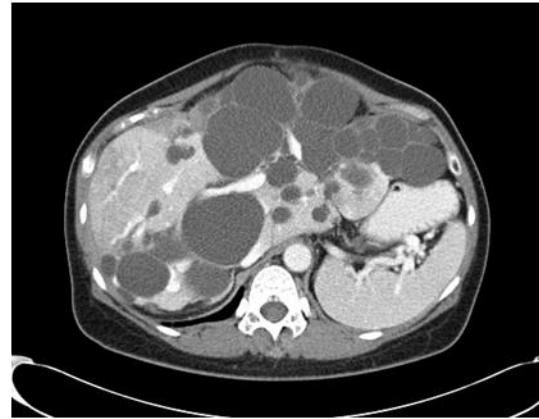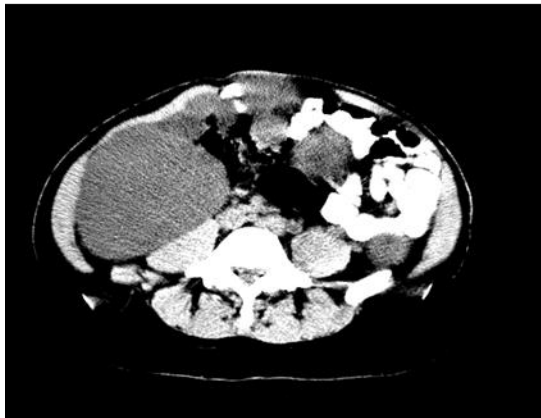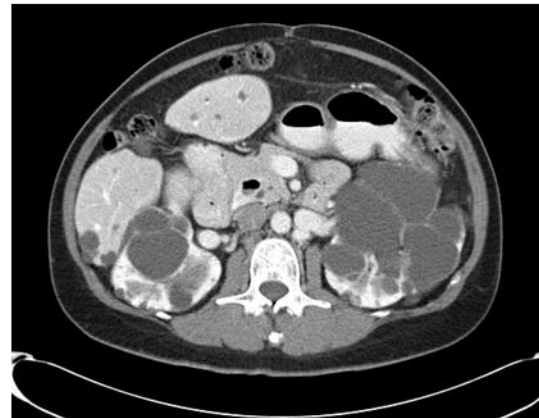

**April-2003**

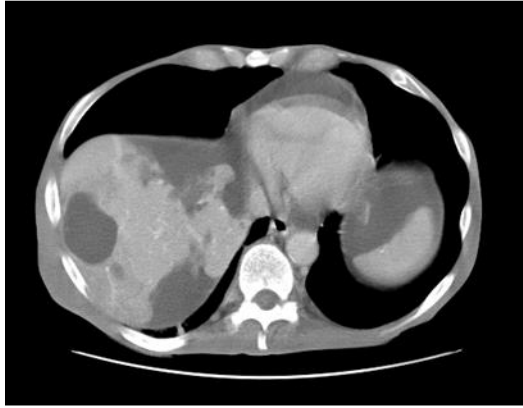

**November-2005**

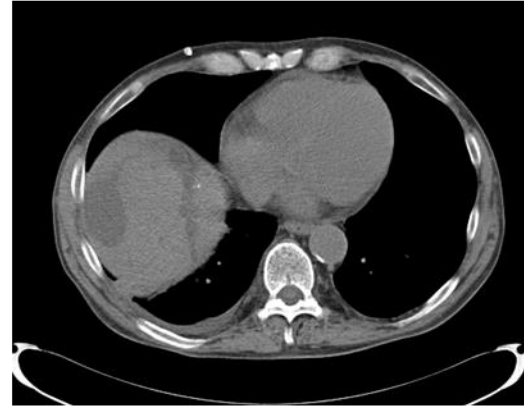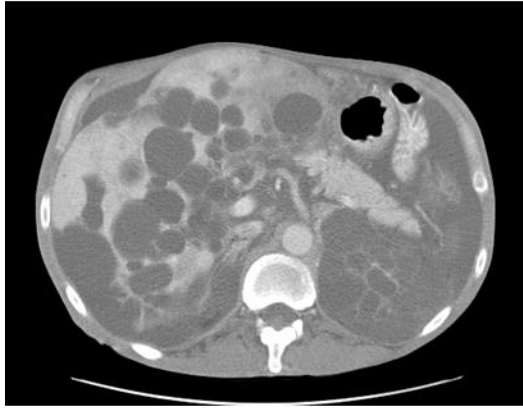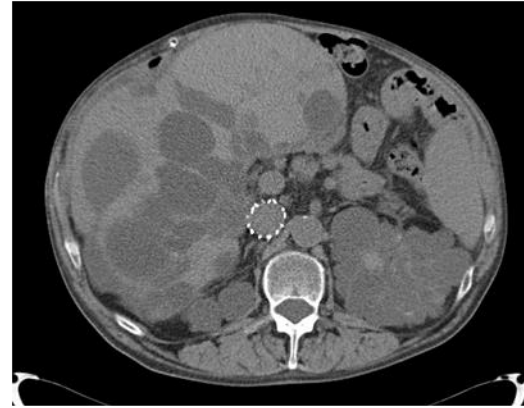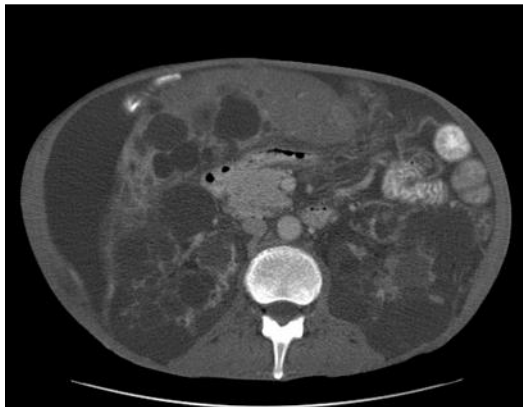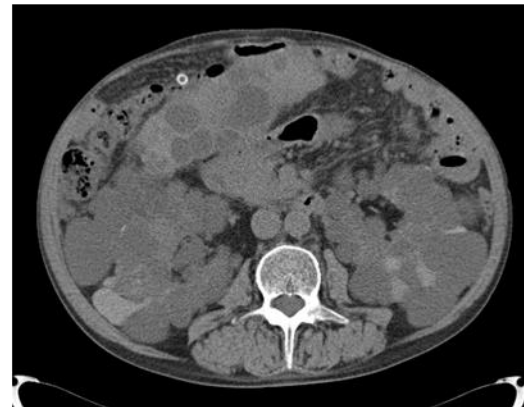

**September-2013**

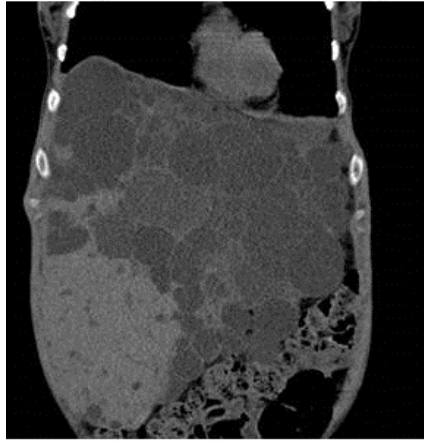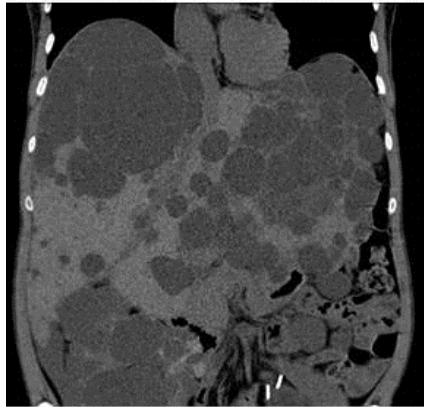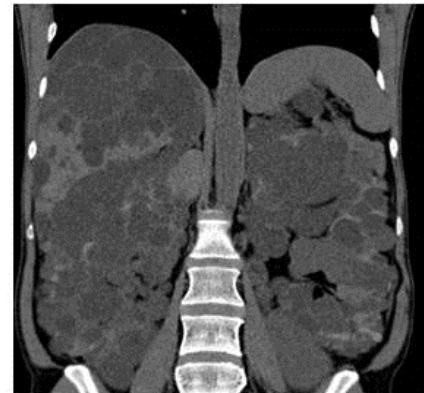

**May-2014**

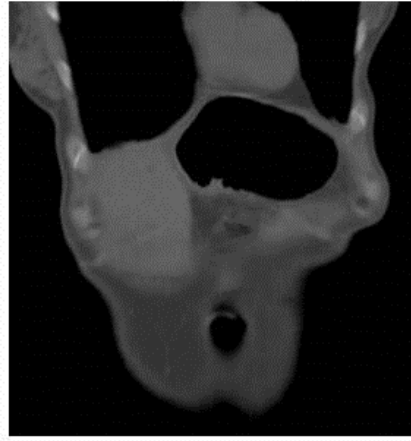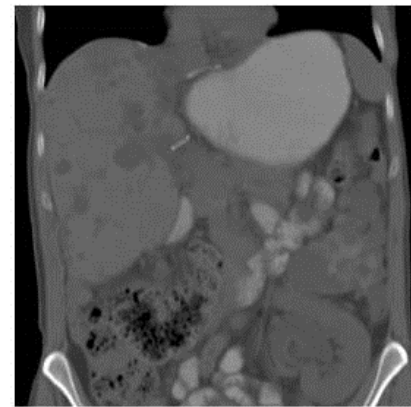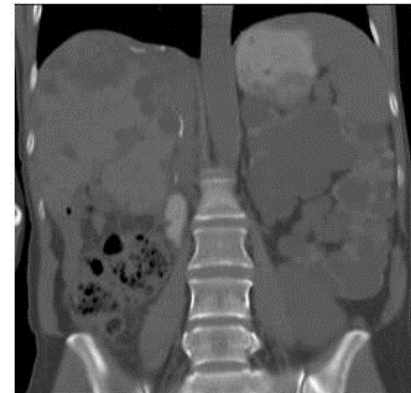



**July-2013**

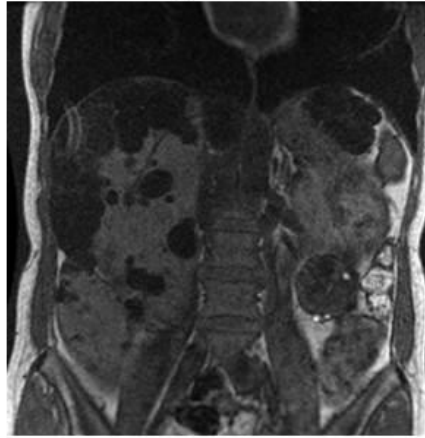

**April-2015**

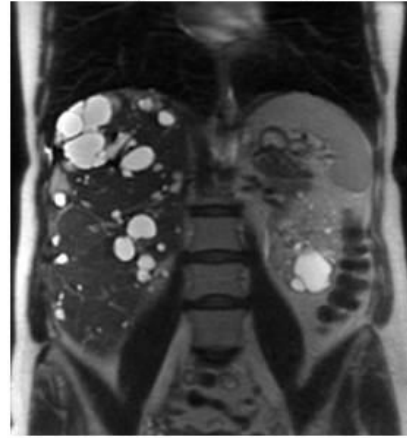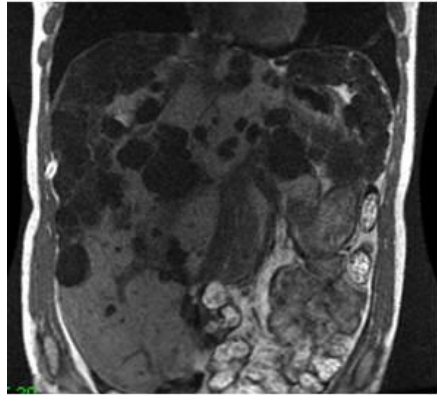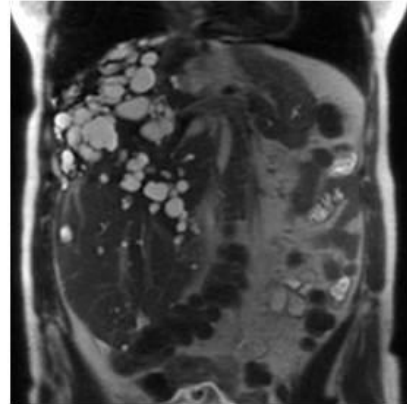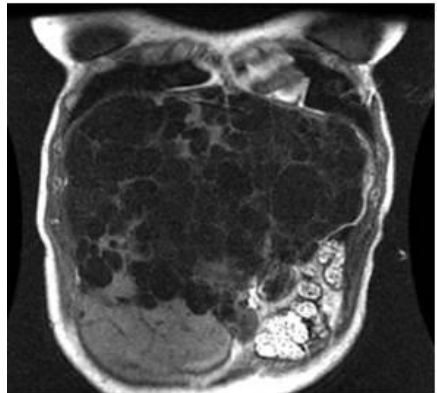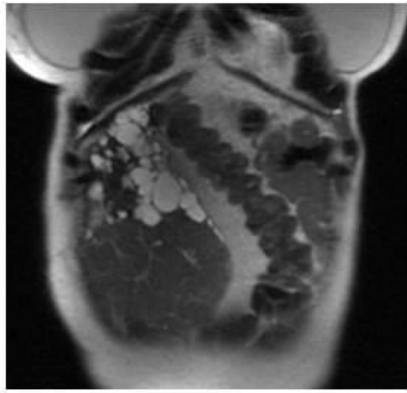

July-2013

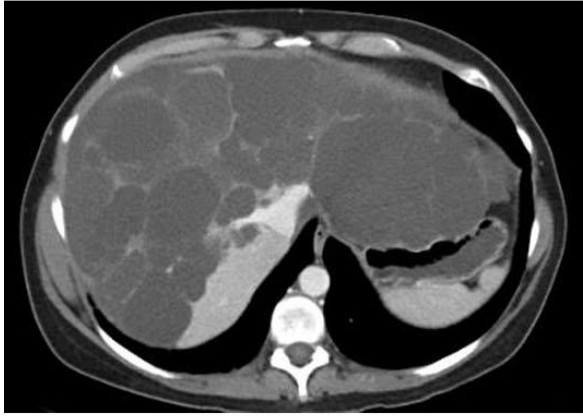

October-2013

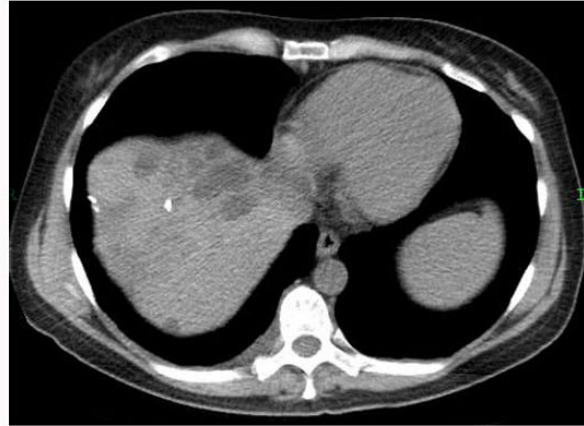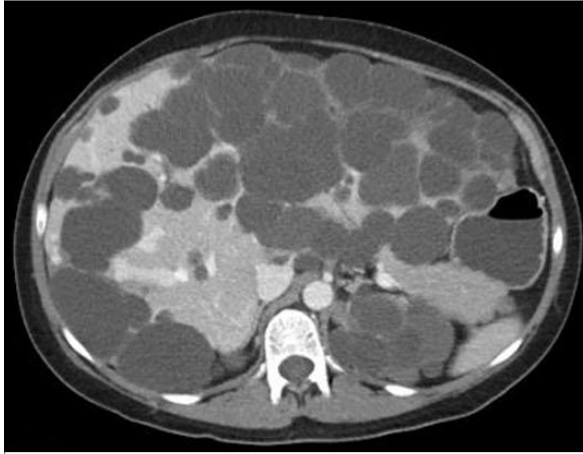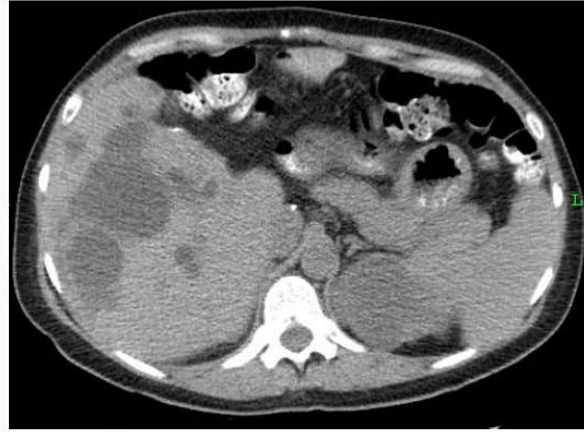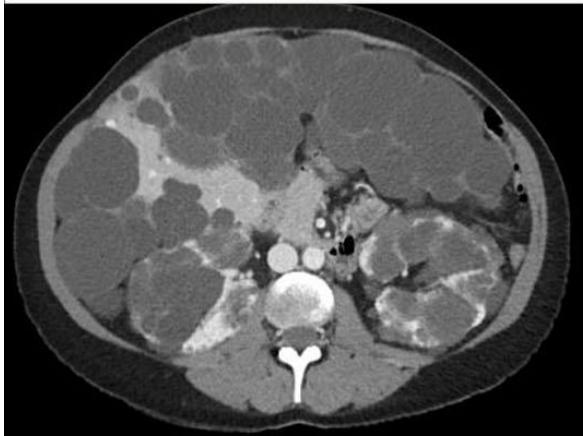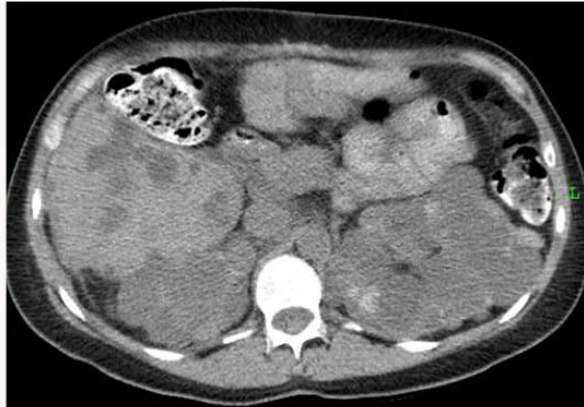

June-2013

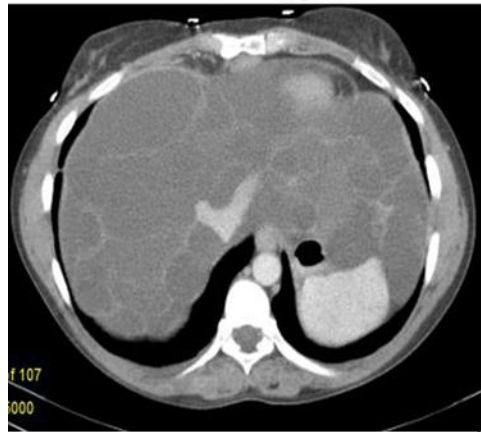

January-2014

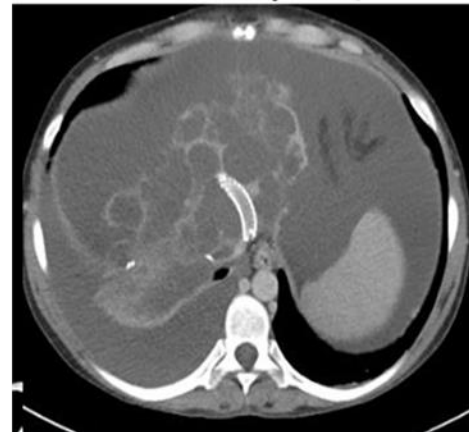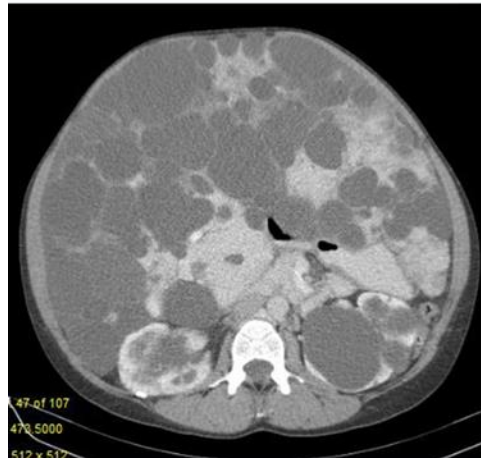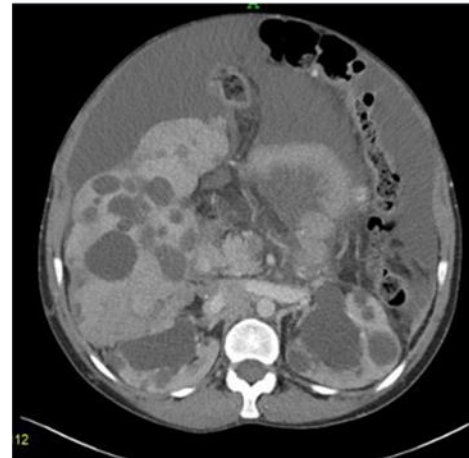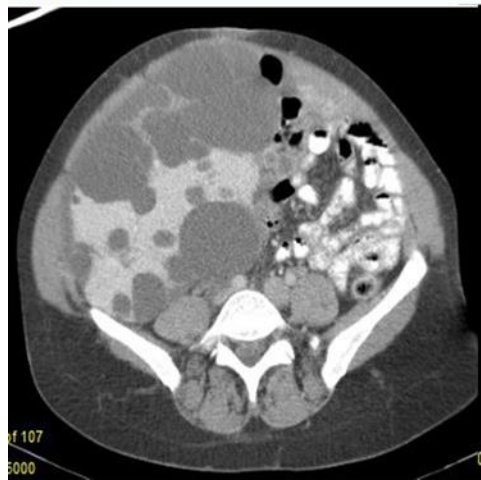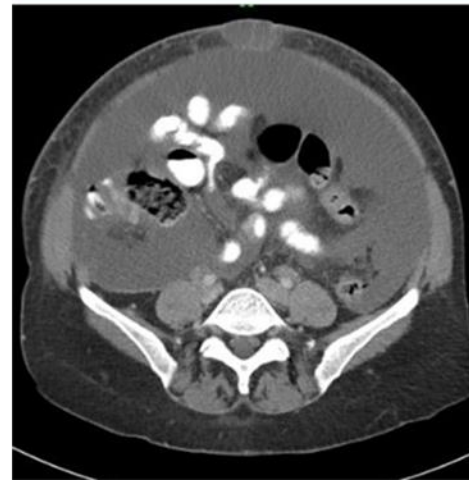

April-1991

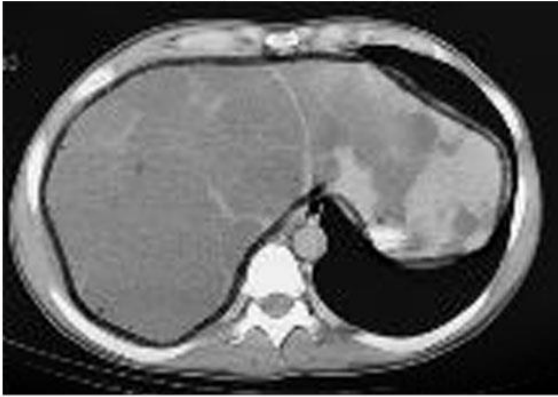

May-1991

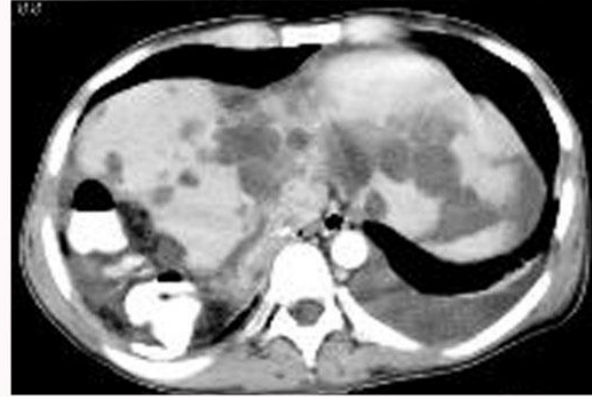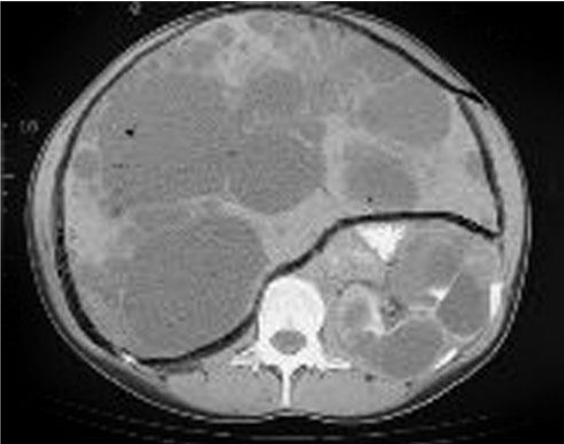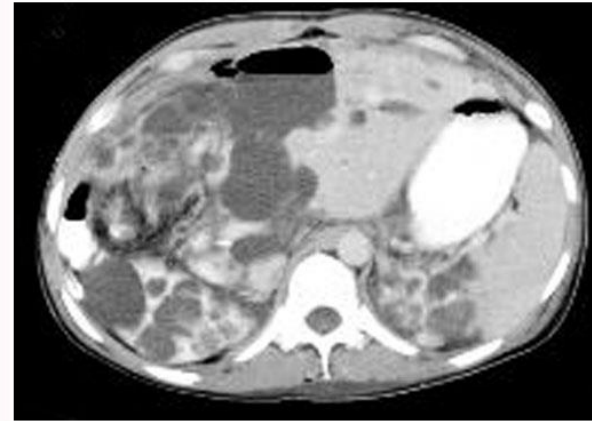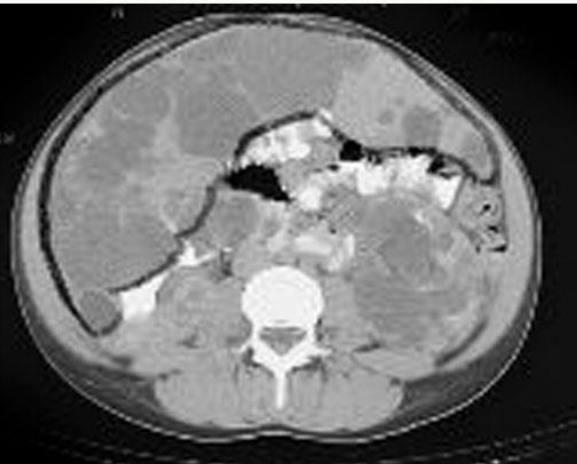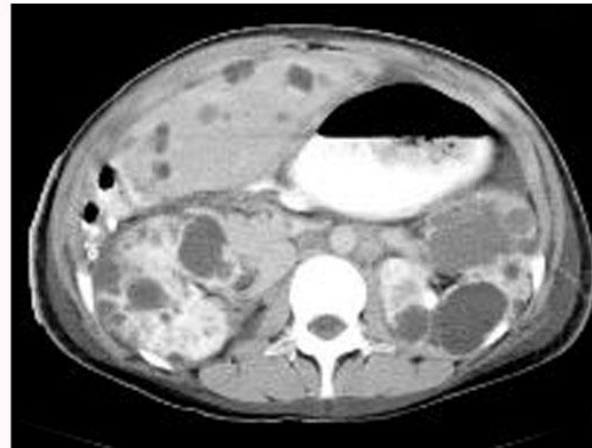

August-2010

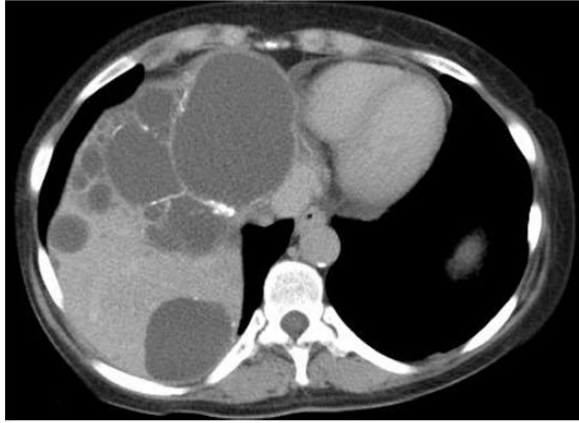

May-2011

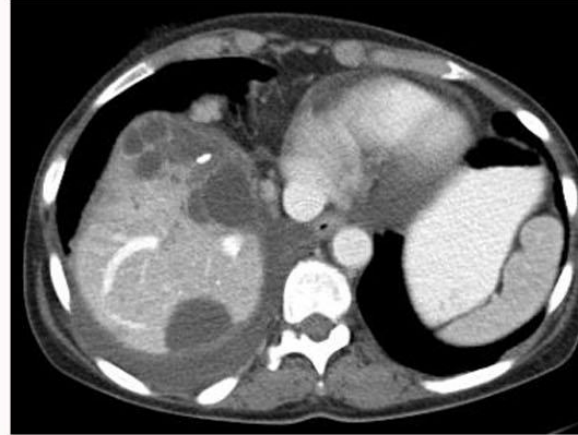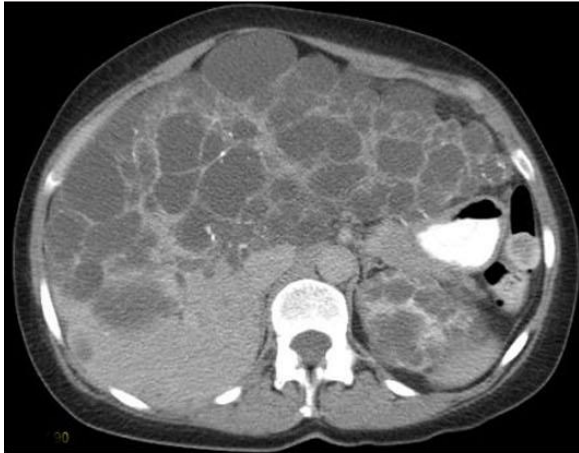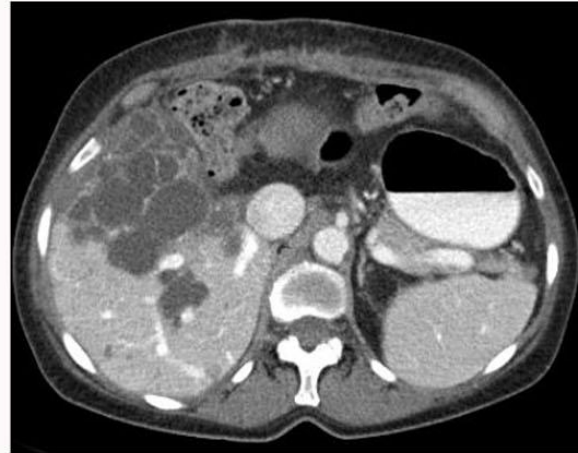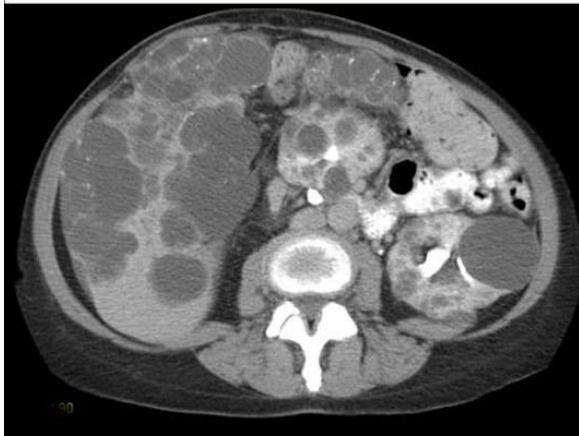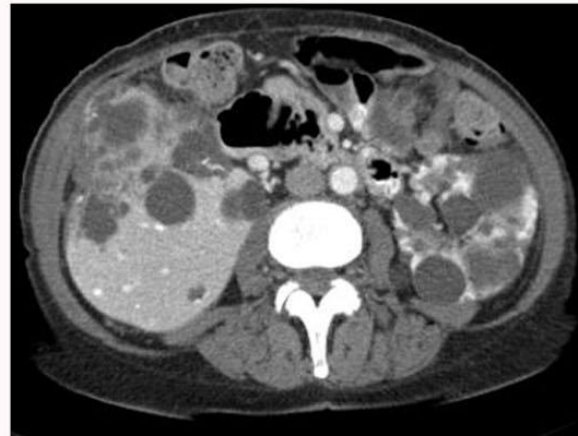

May-2012

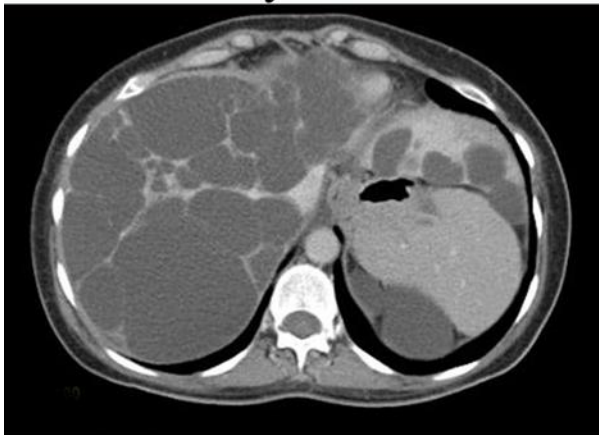

October-2012

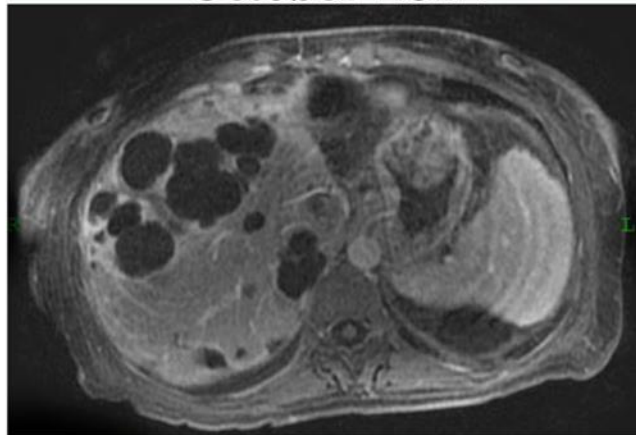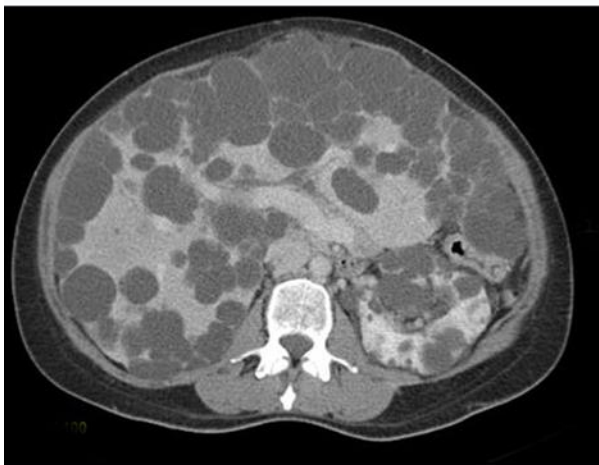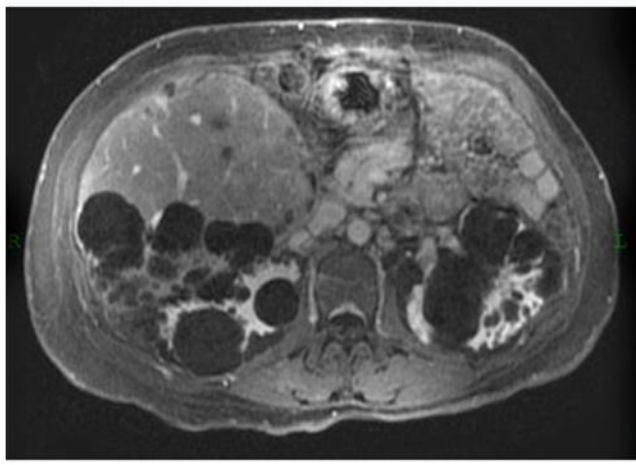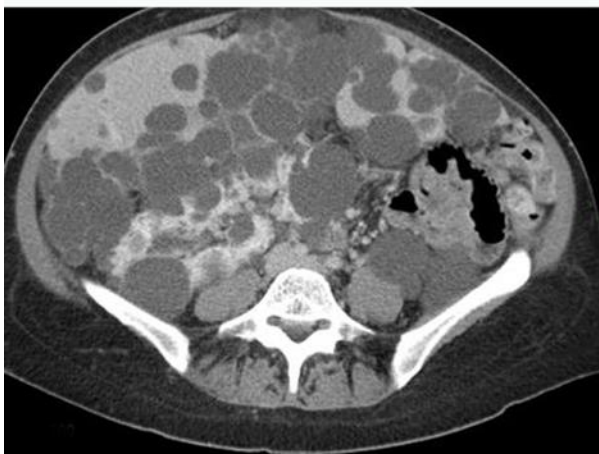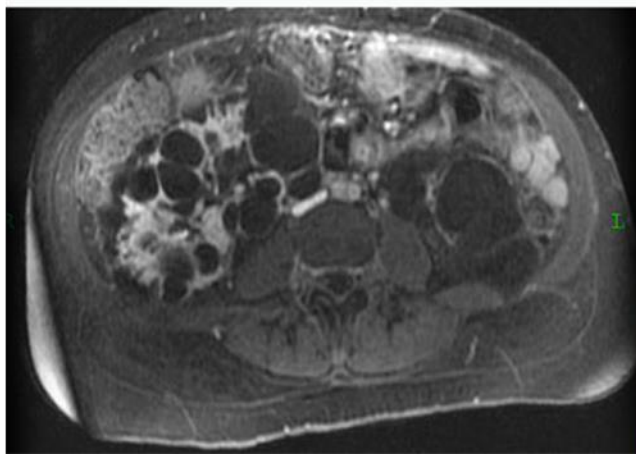

July-2011

February-2012

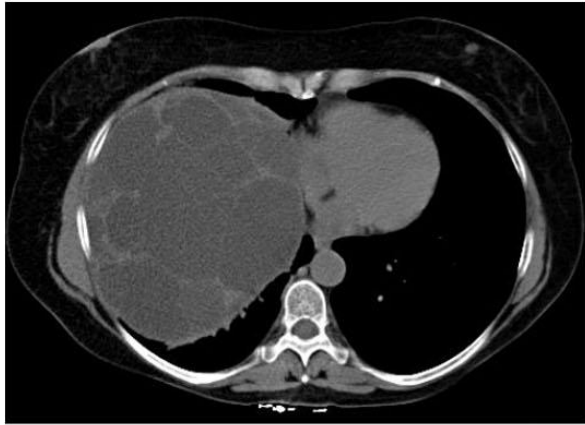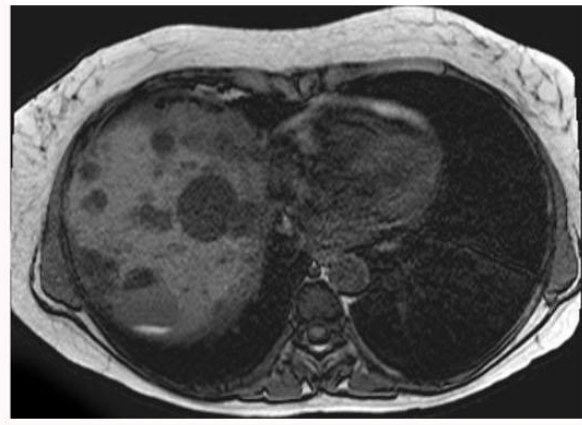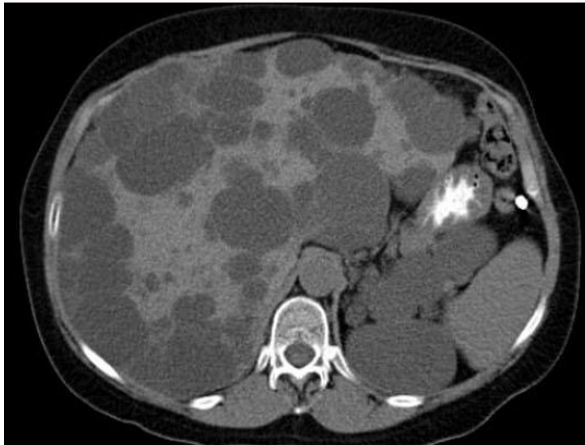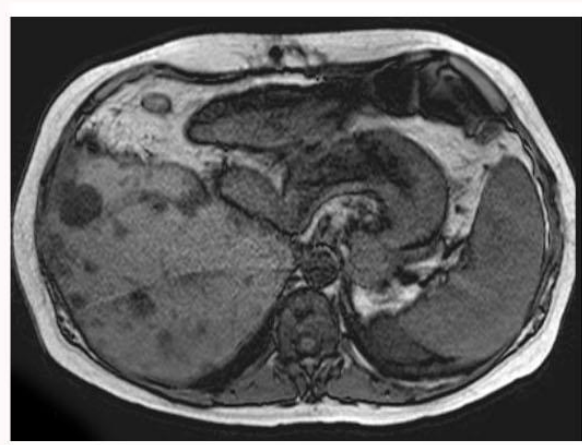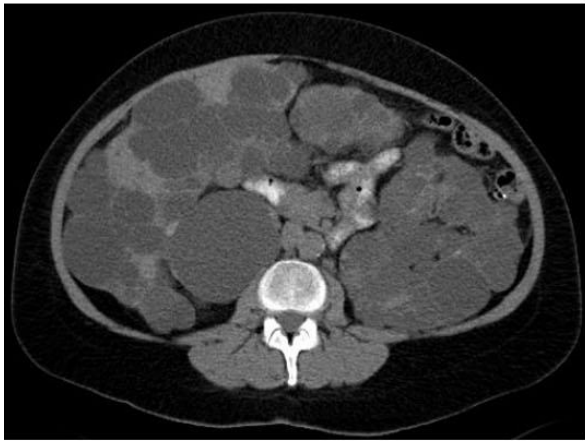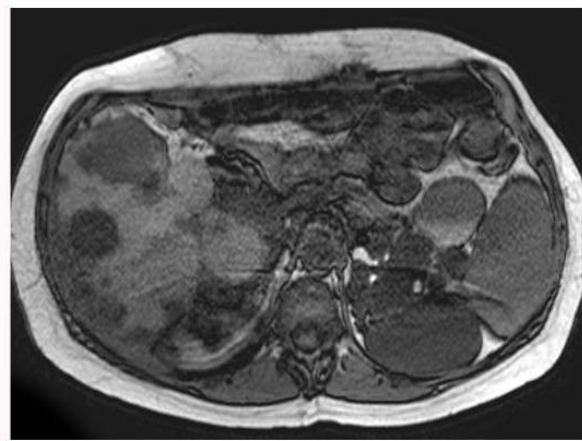

September-2010

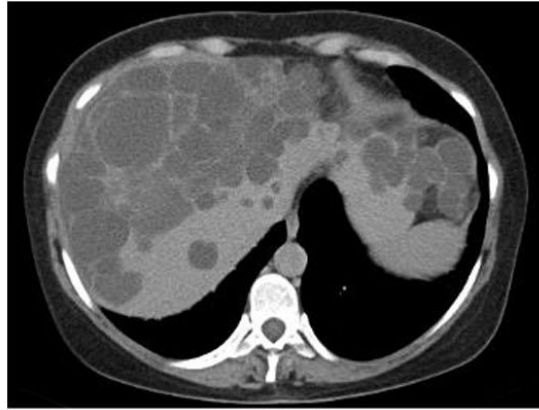

April-2011

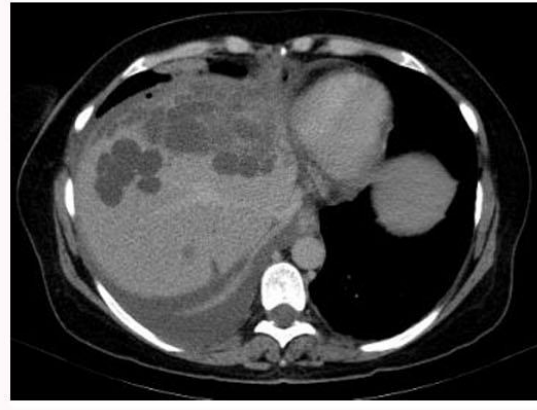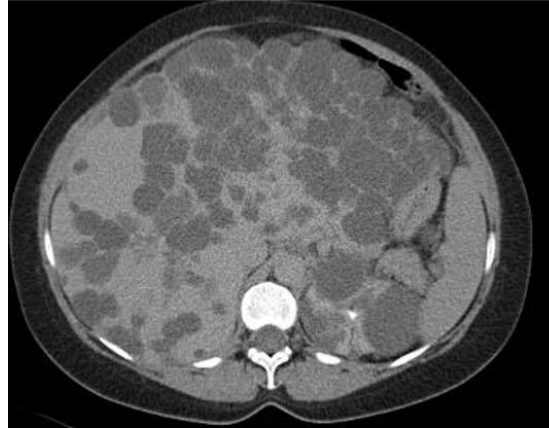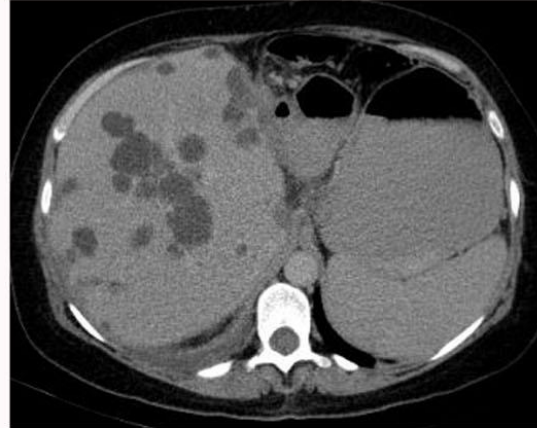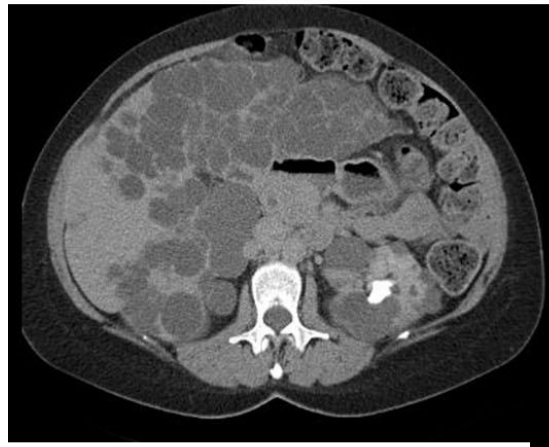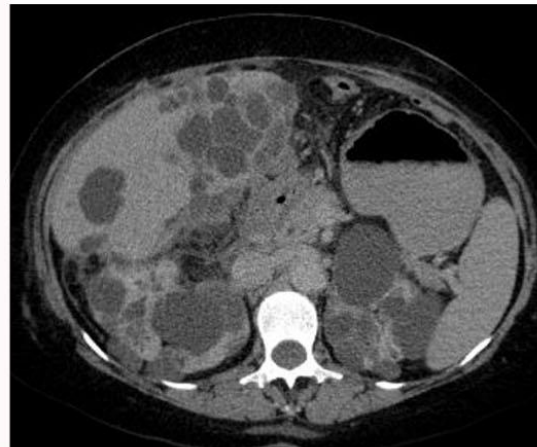



February-2009

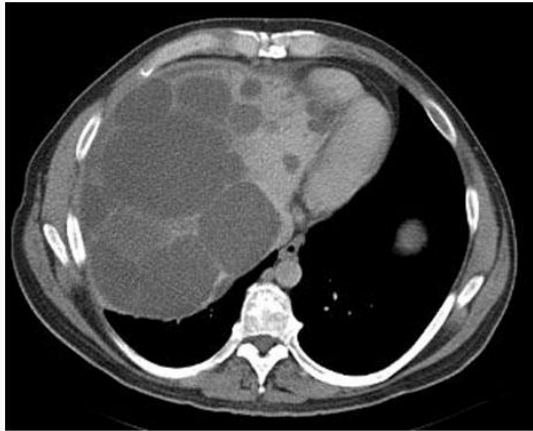

May-2009

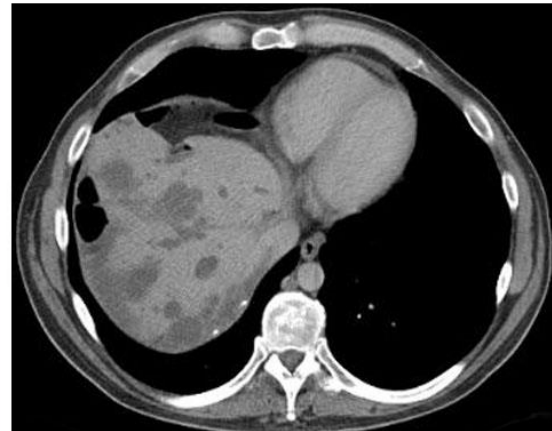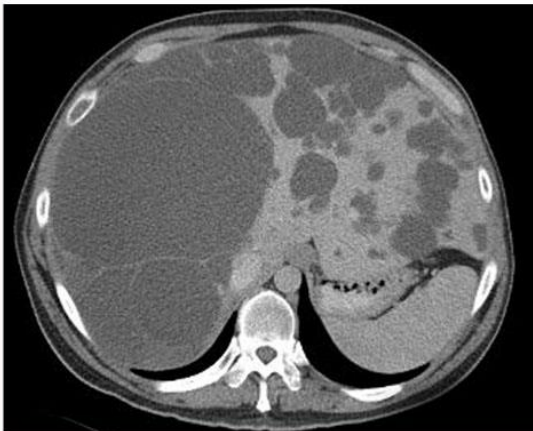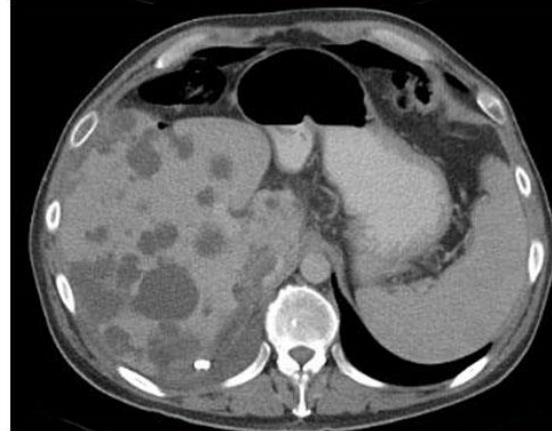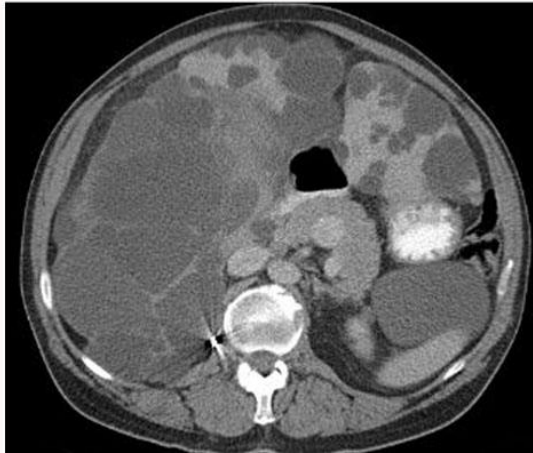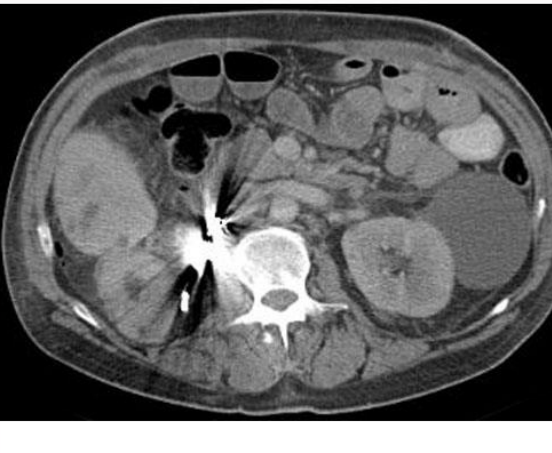

April-2009

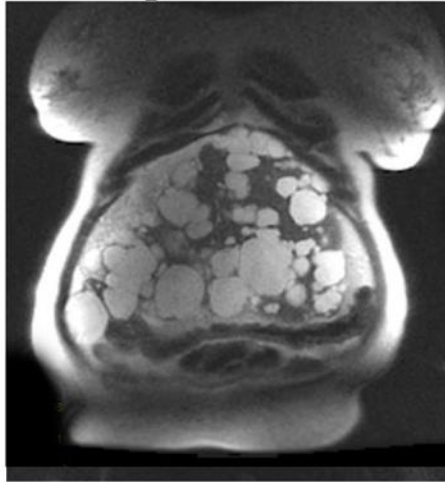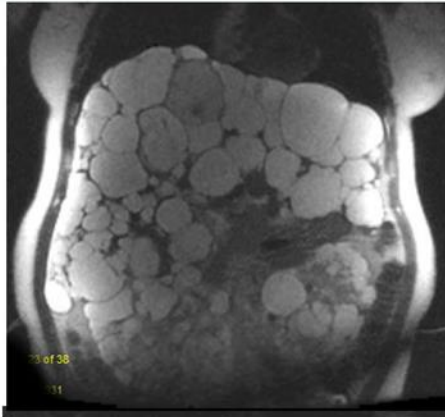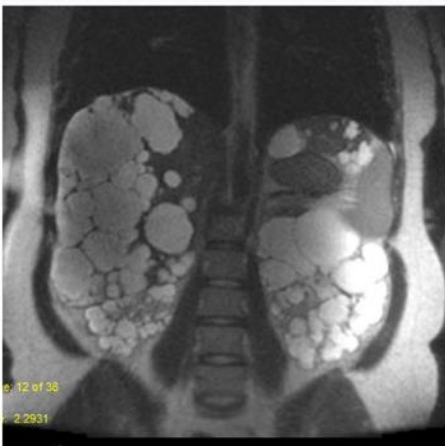

April-2014

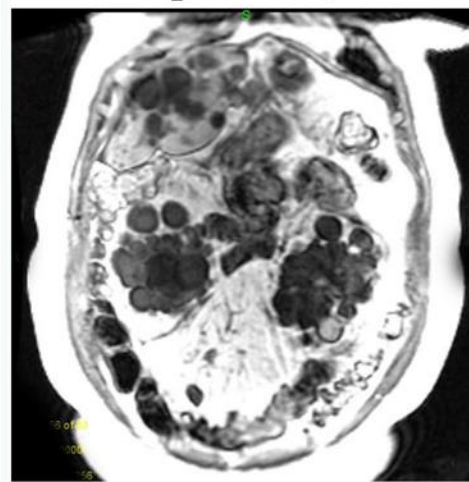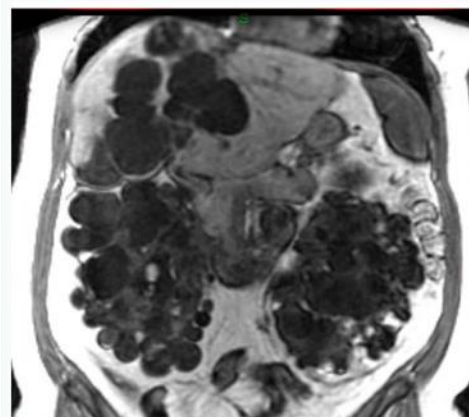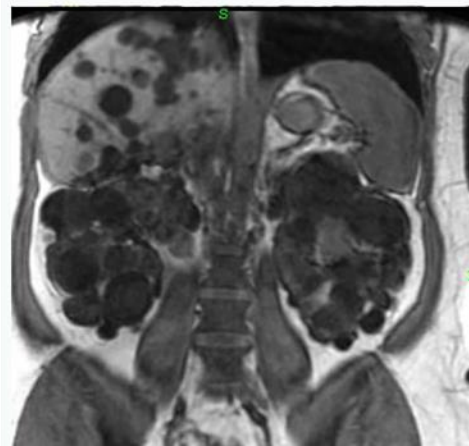

December-2008

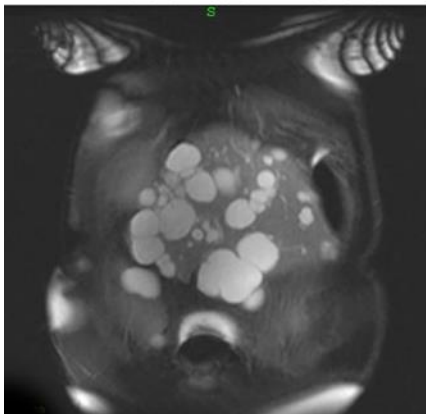

March-2009

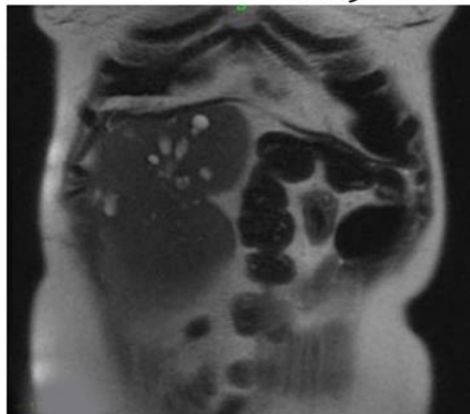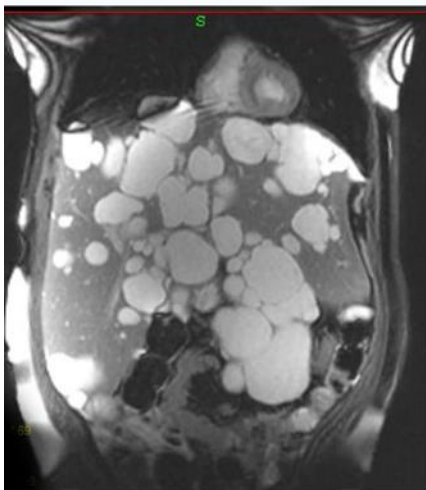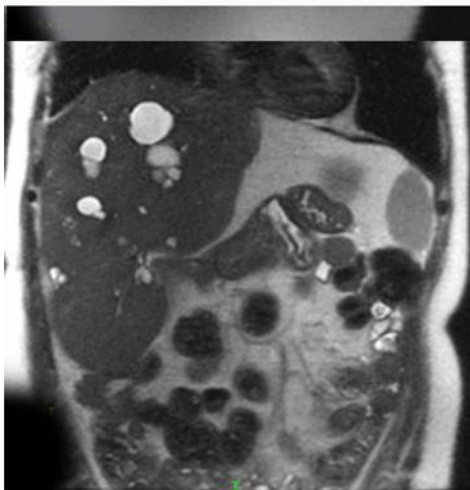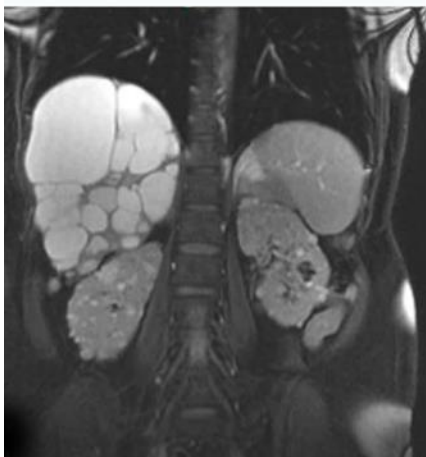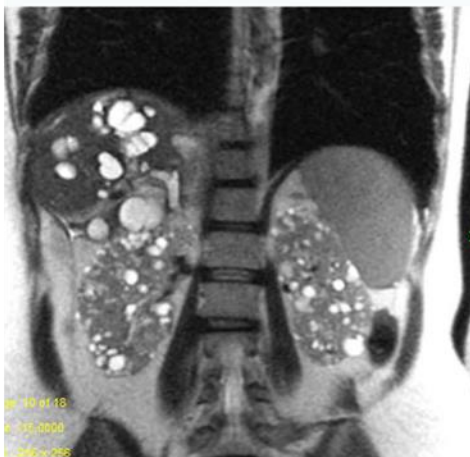

**January-2009**

**October-2014**

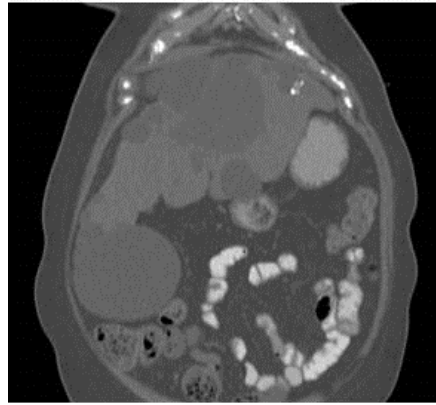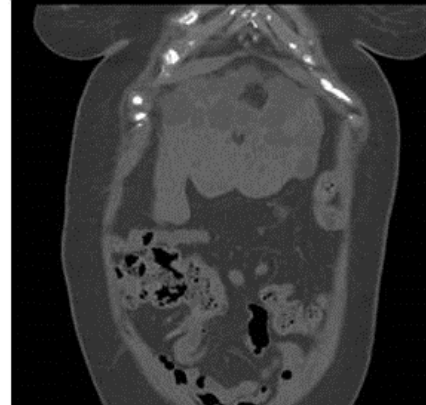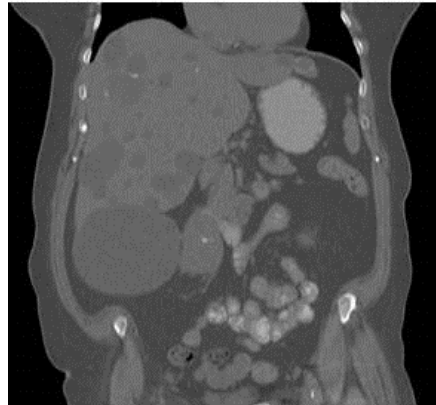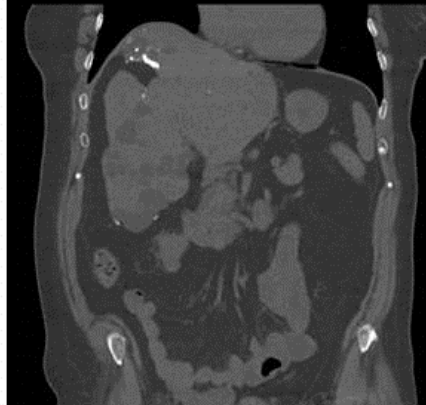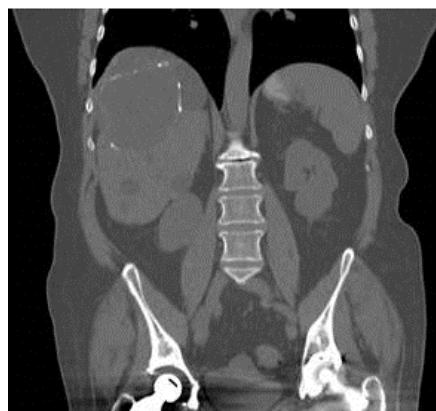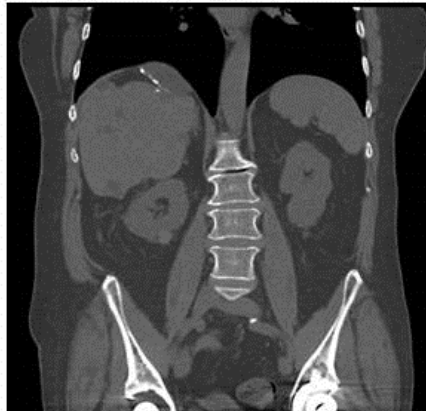

August-2008

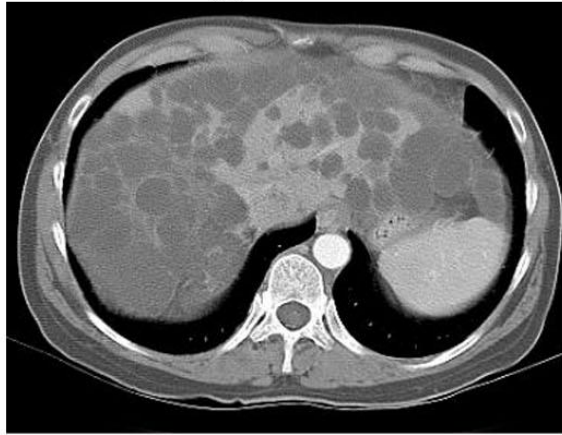

November-2009

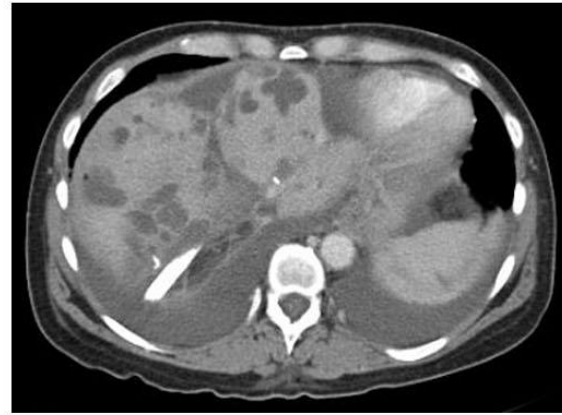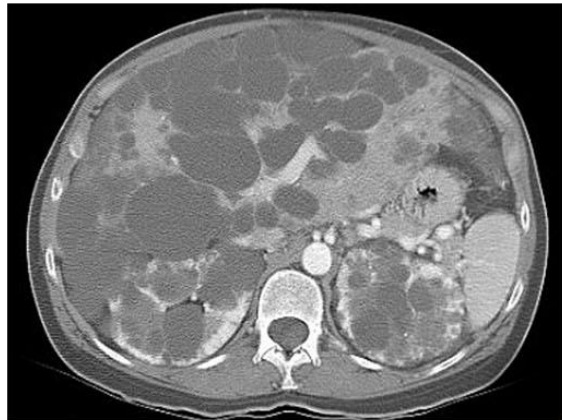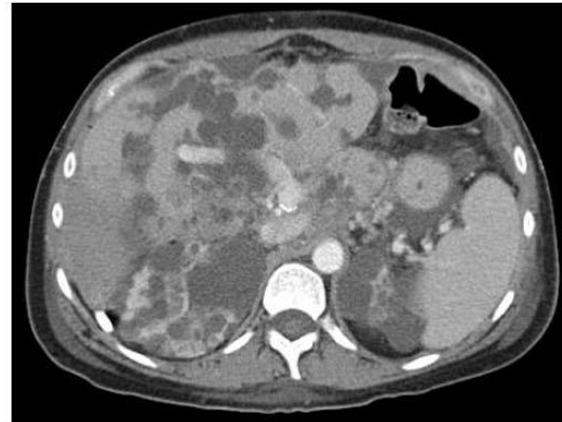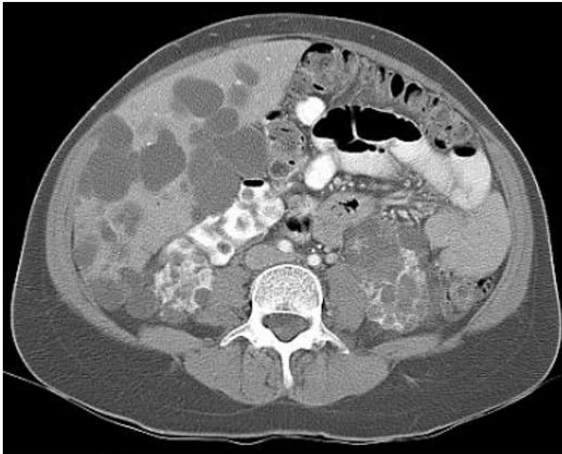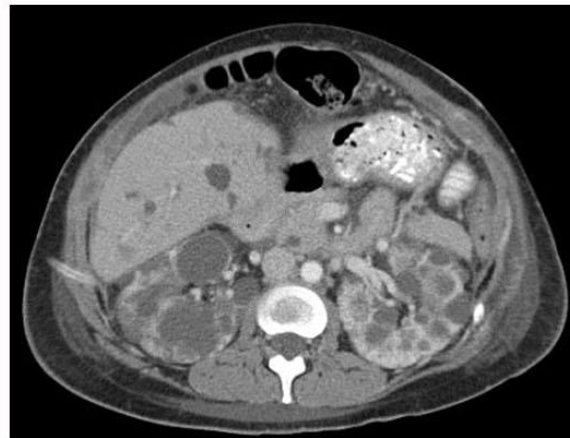

March-2000

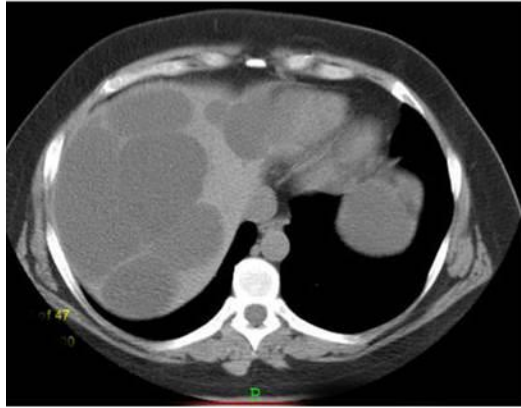

June-2010

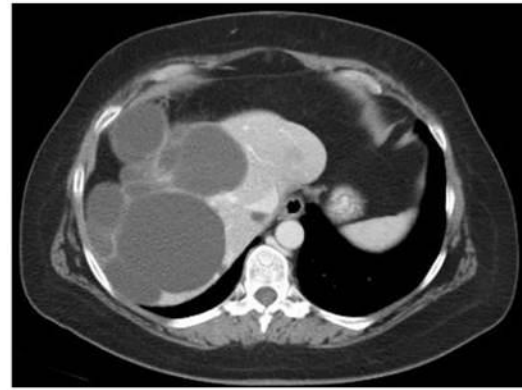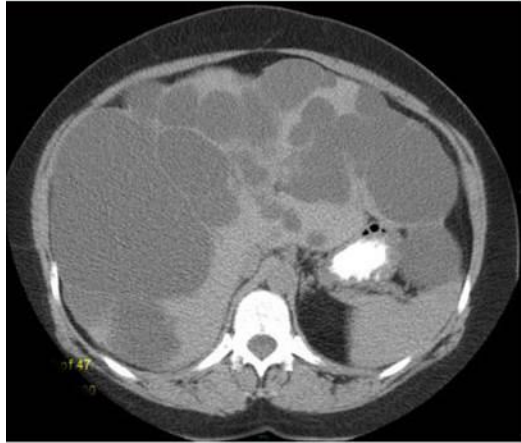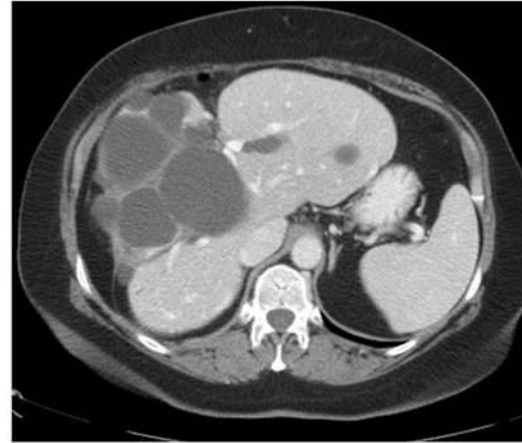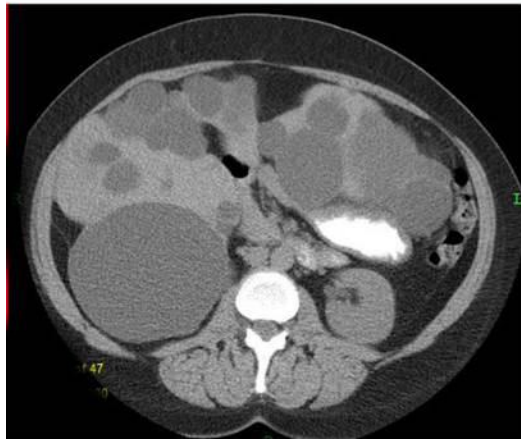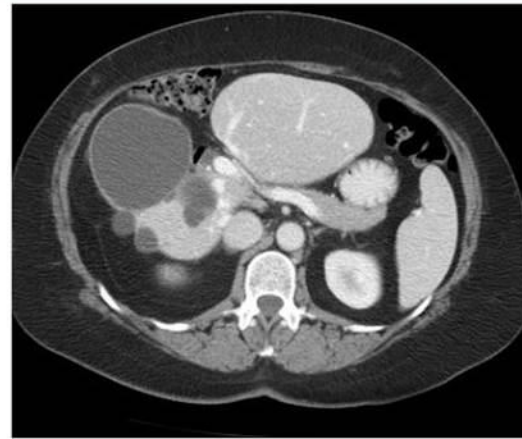

May-2008

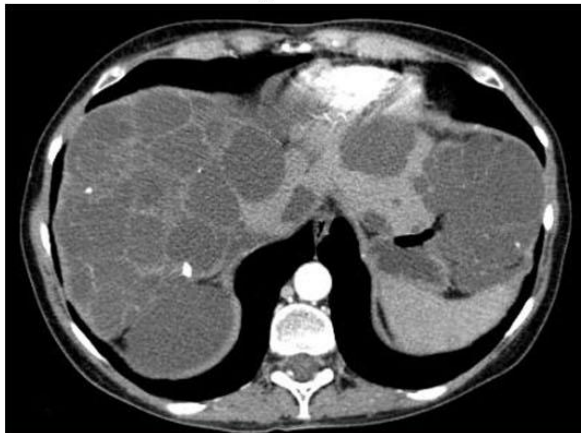

November-2008

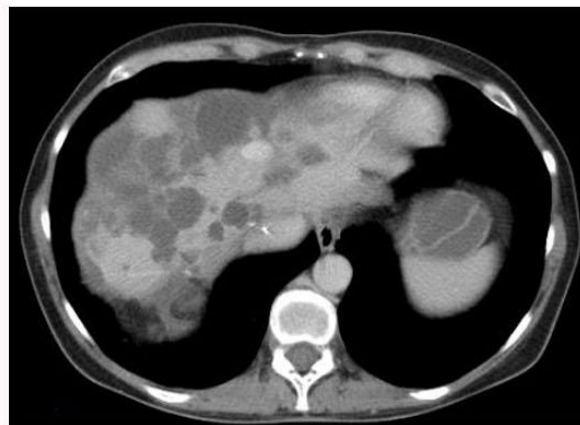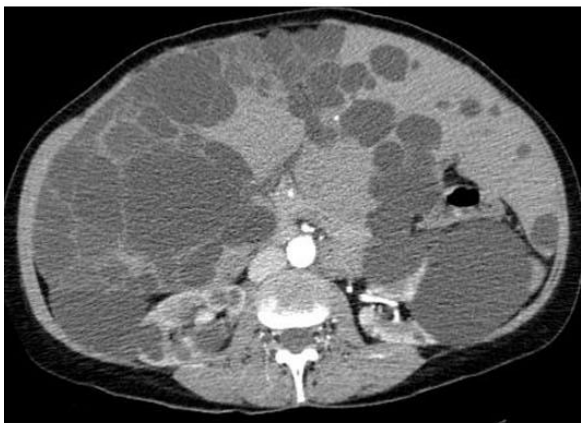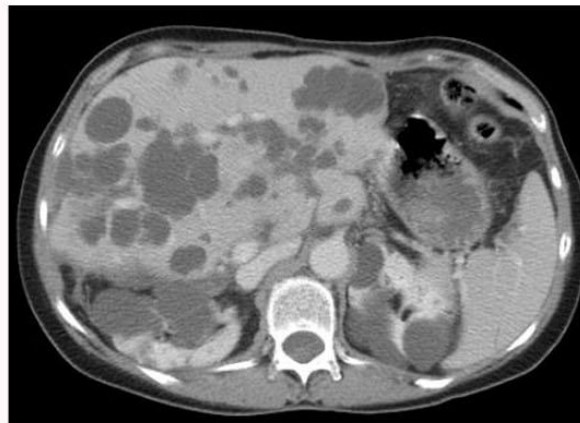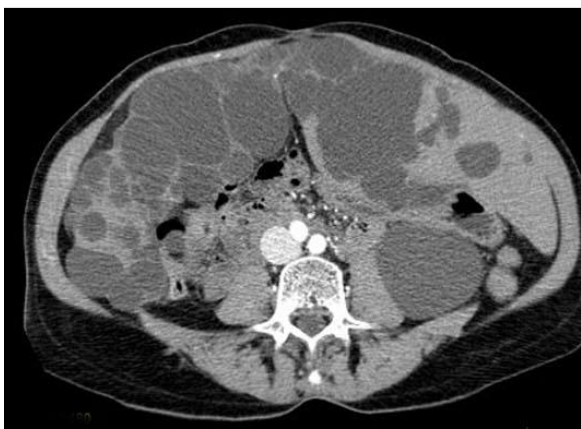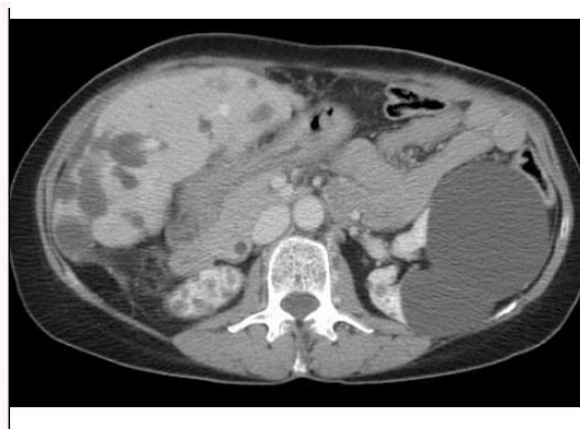

April-2008

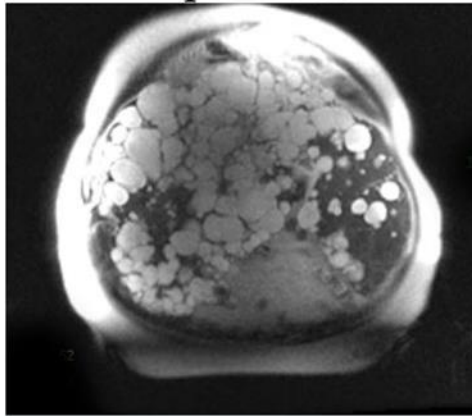

January-2009

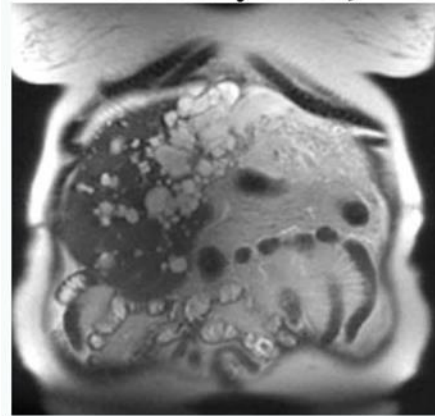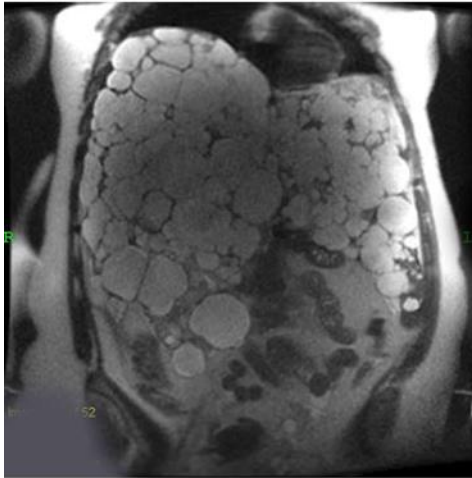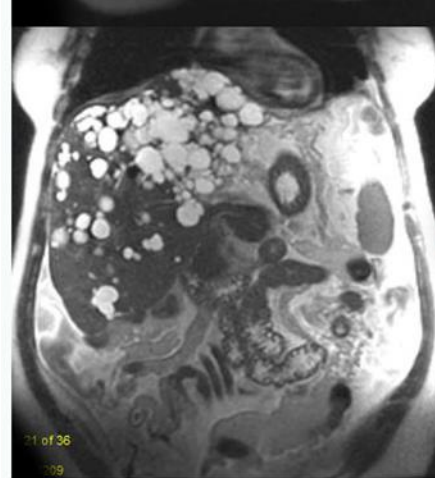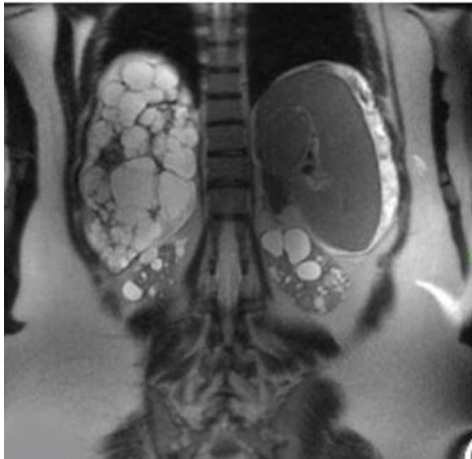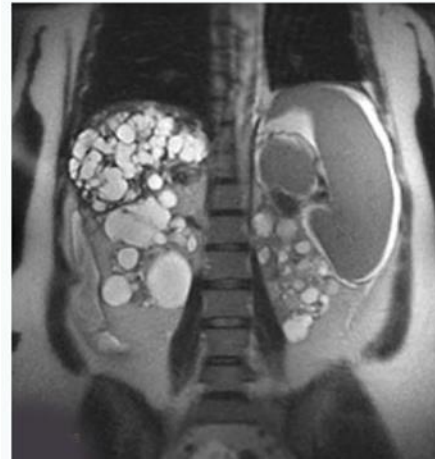



July-1991

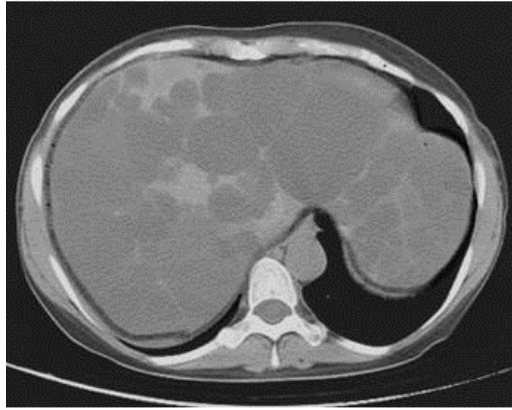

May-2015

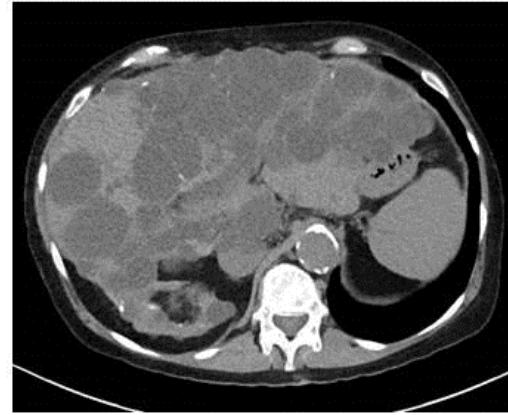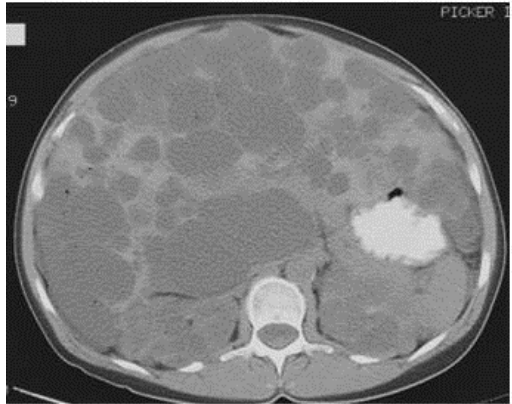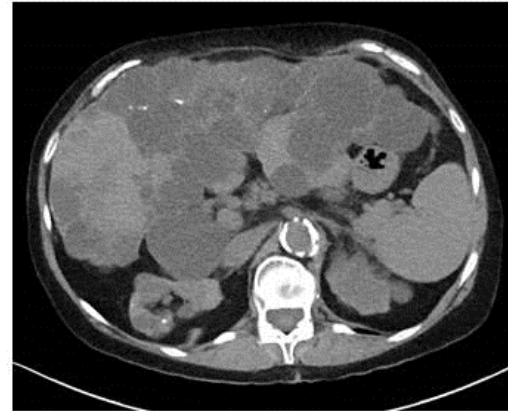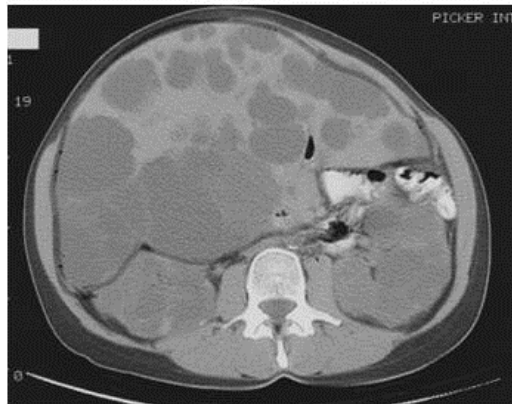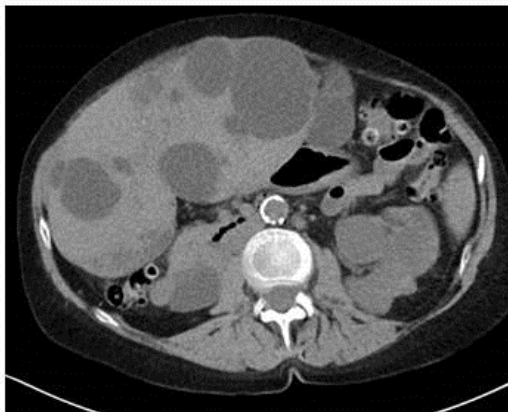

November-1991

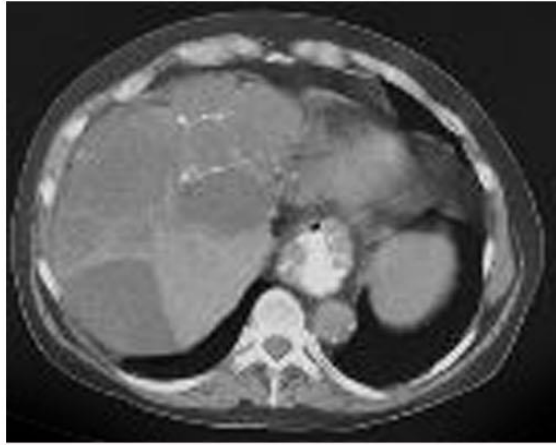

February-1992

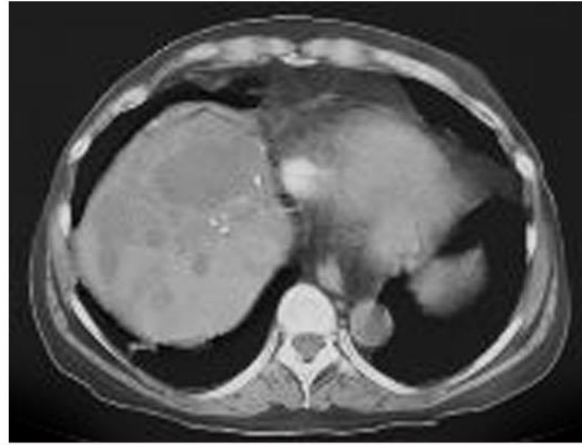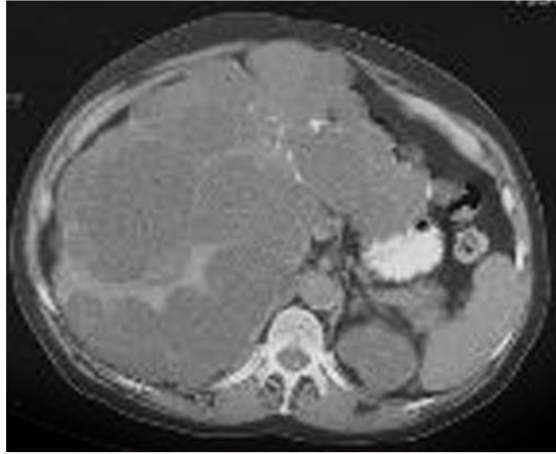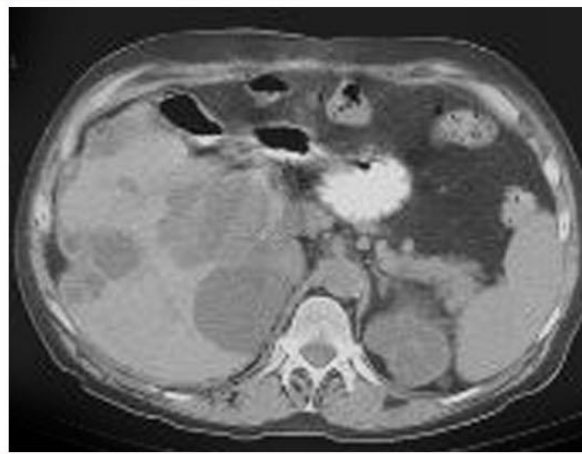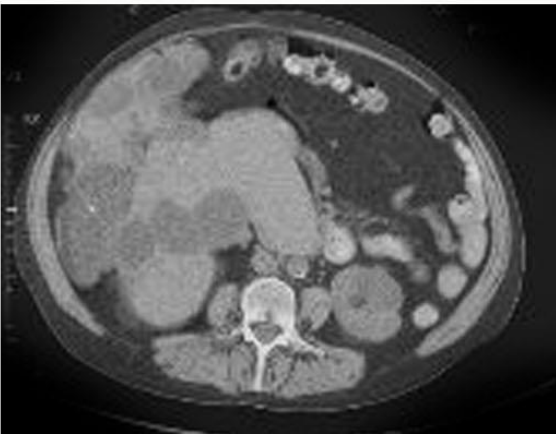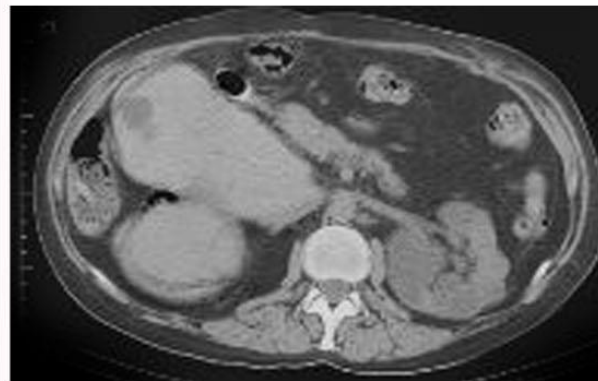

March-2008

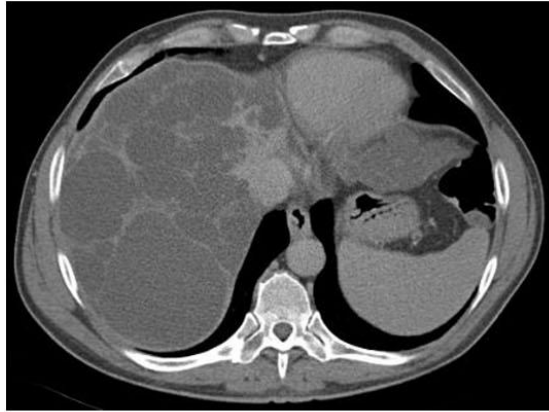

June-2008

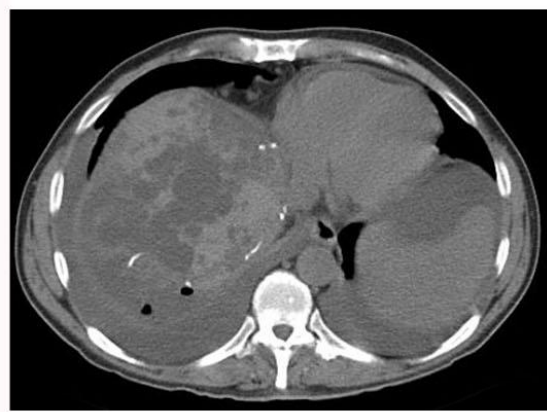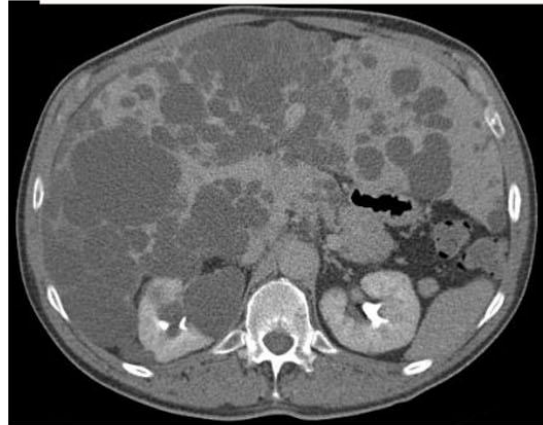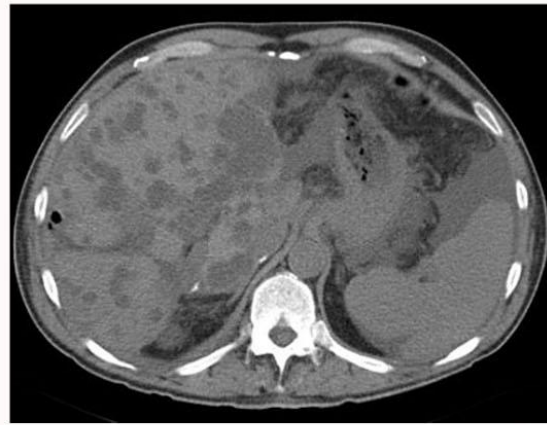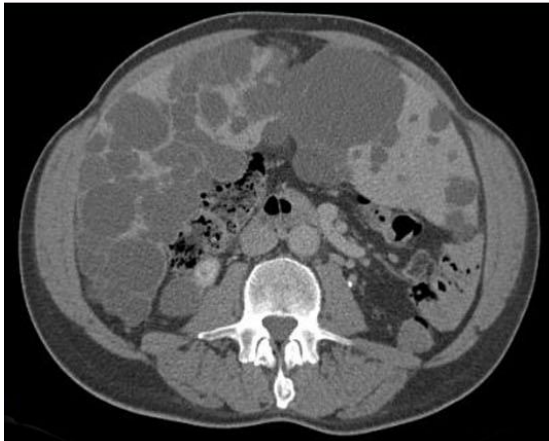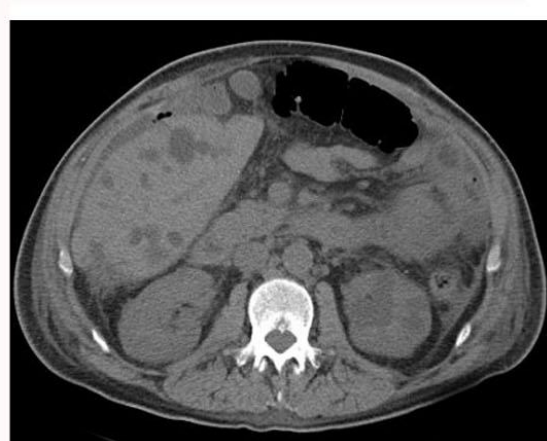

February-2008

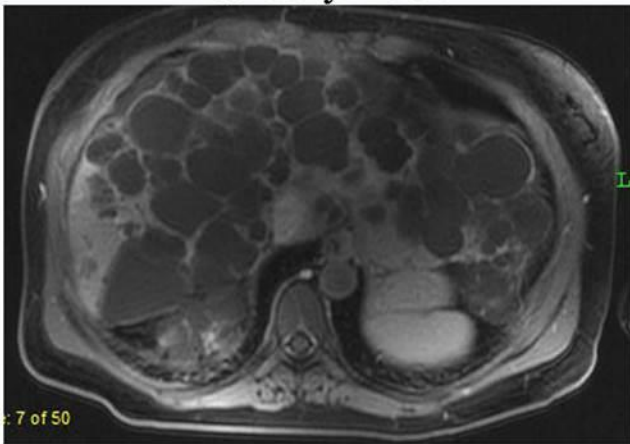

September-2008

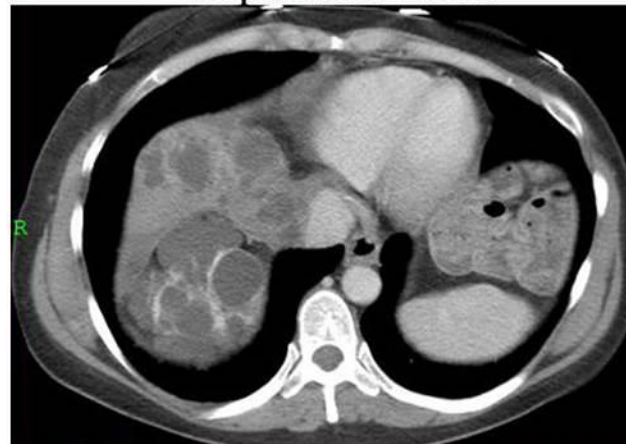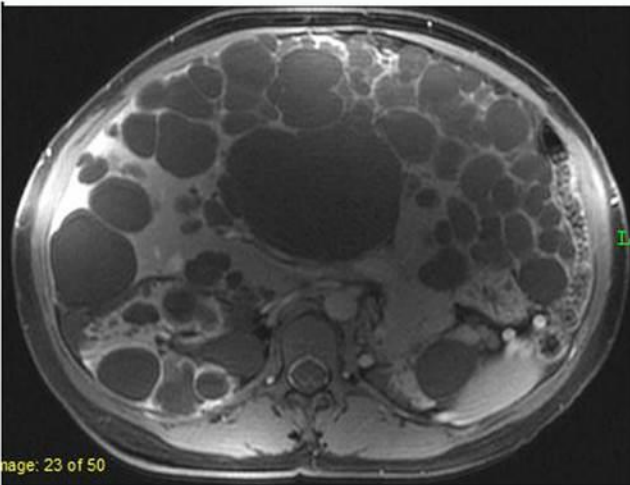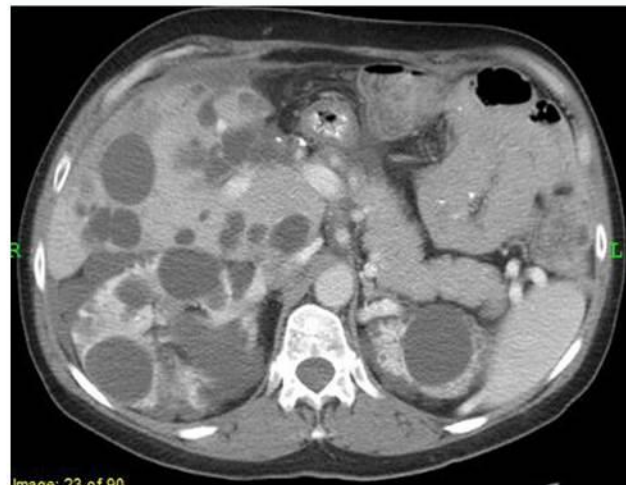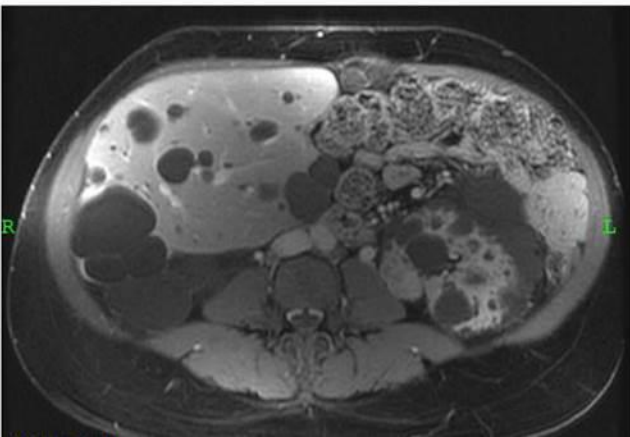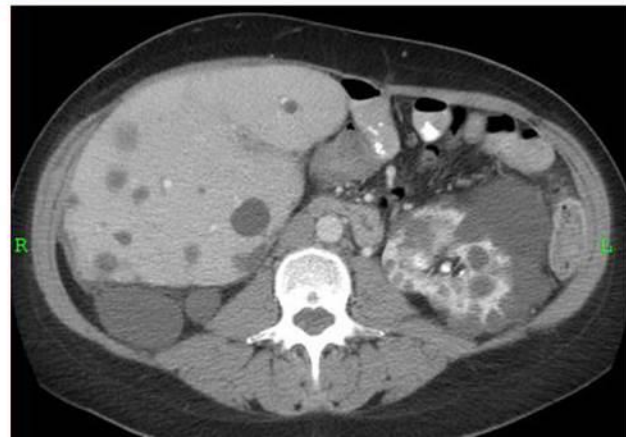

January-2008

February-2008

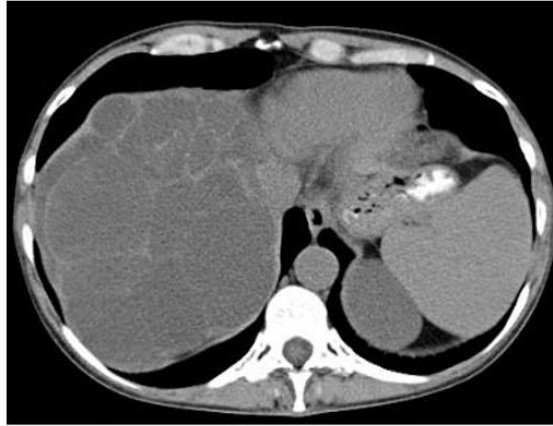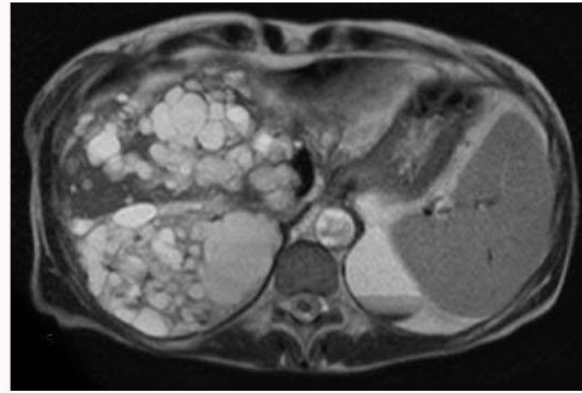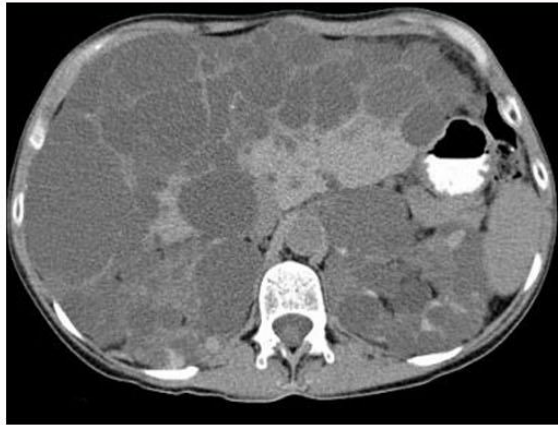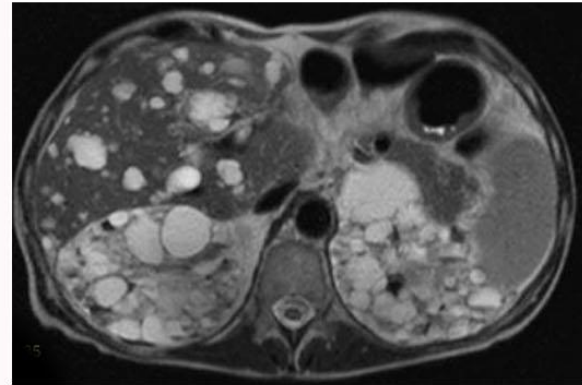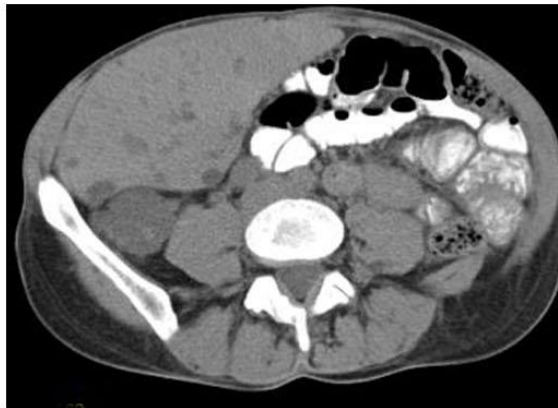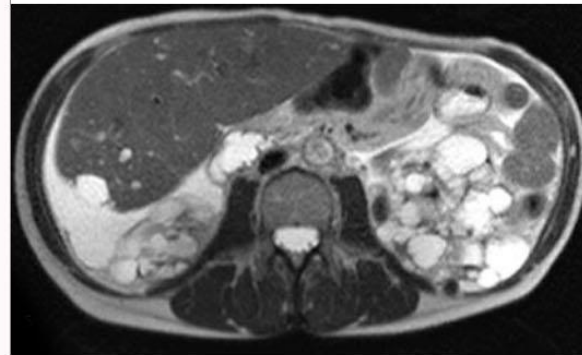

April-1992

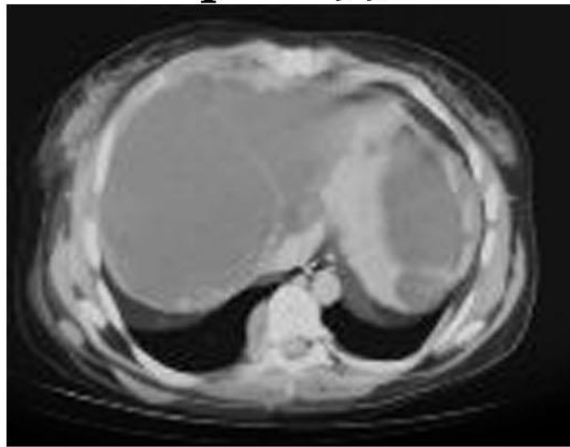

June-1995

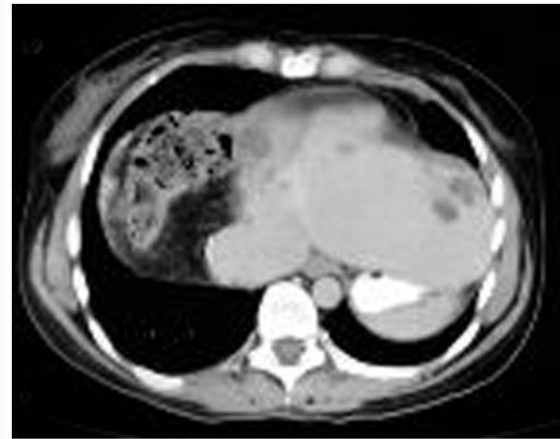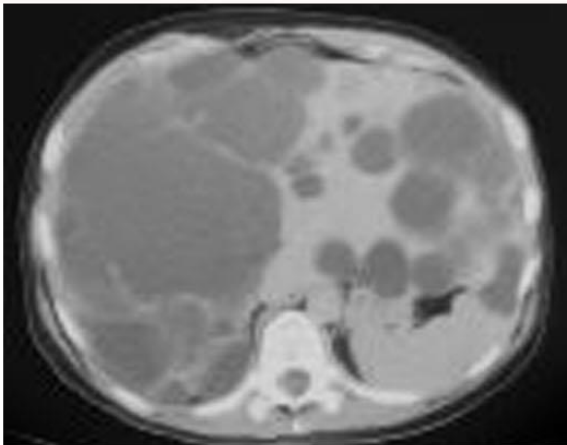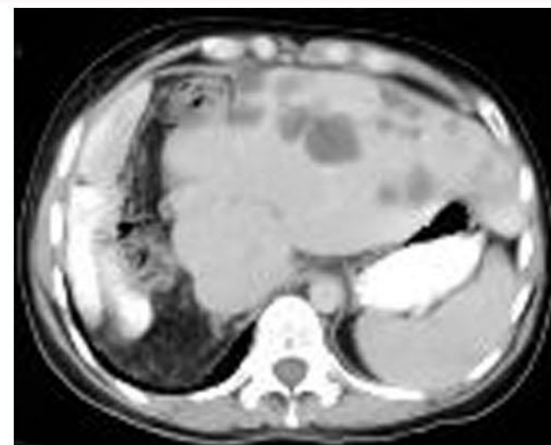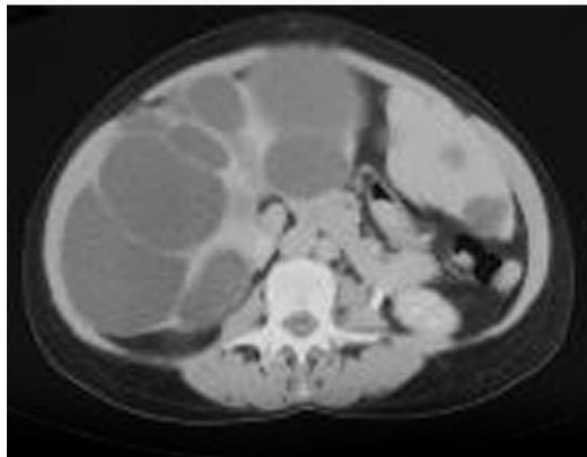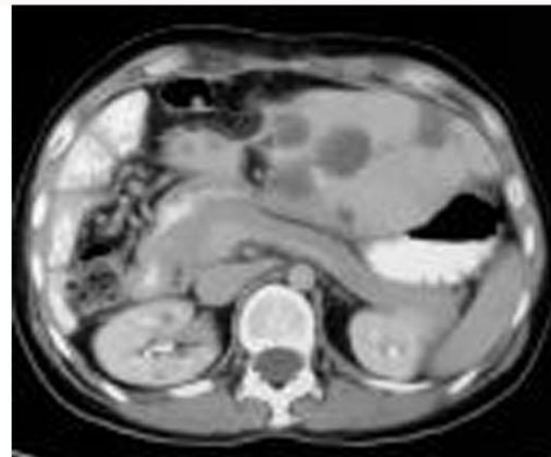

February-2006

August-2006

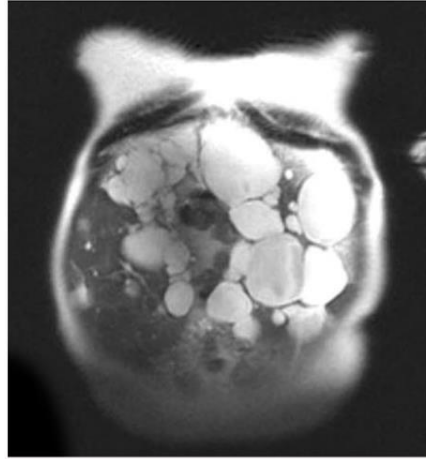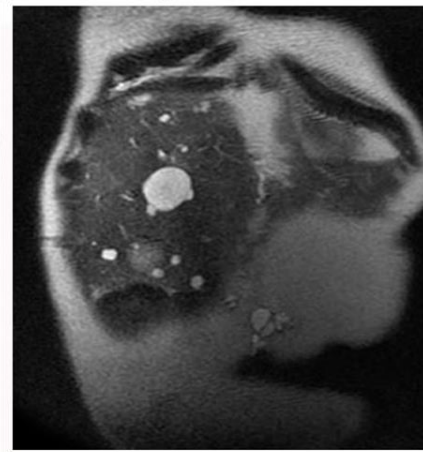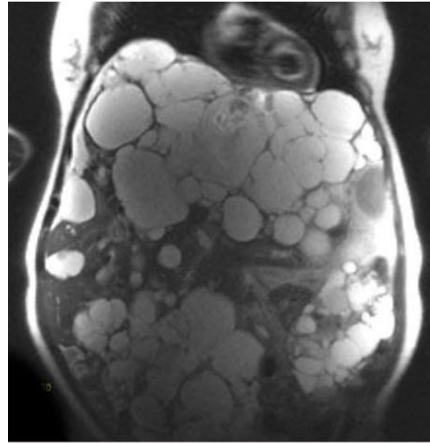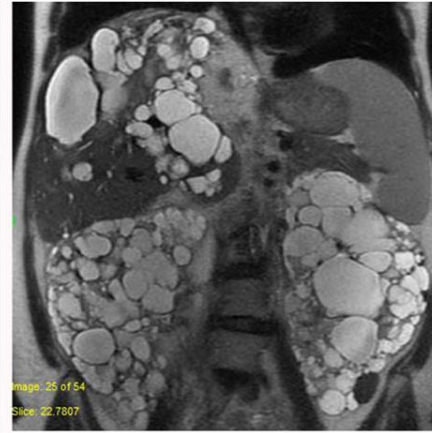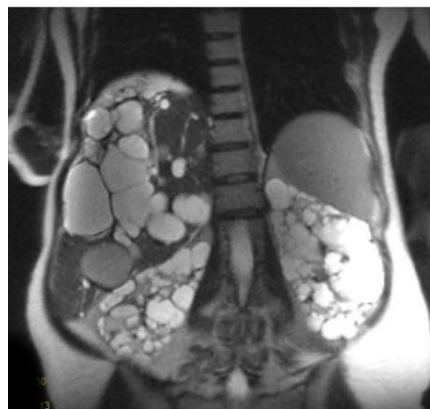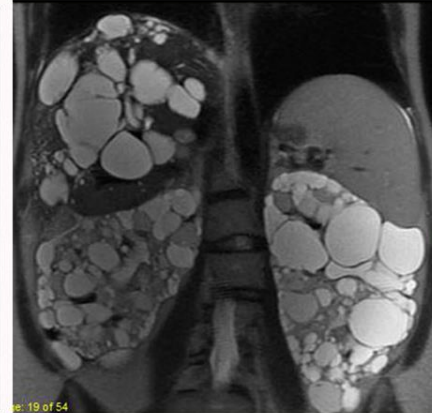

January-2004

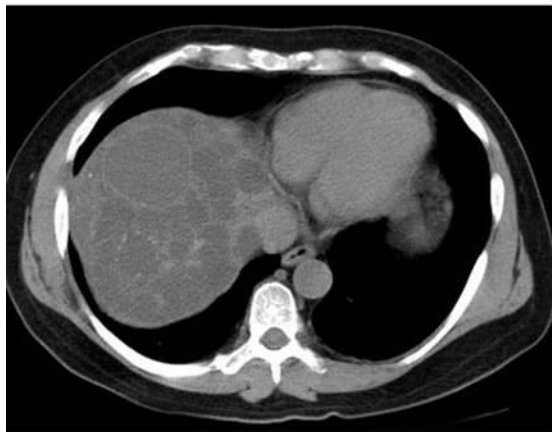

September-2007

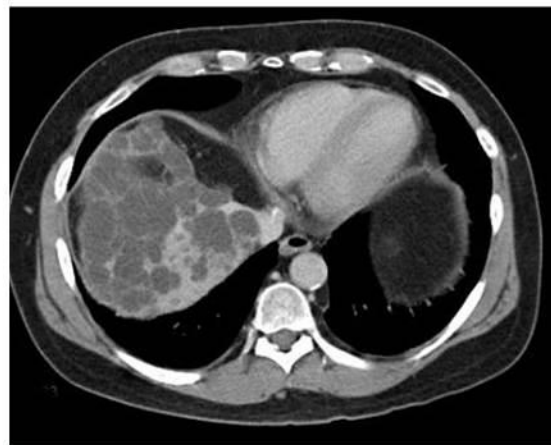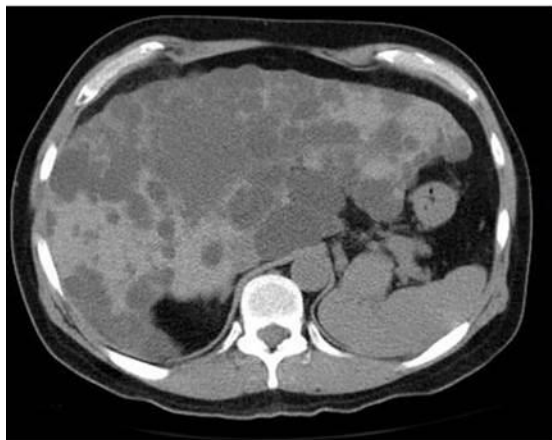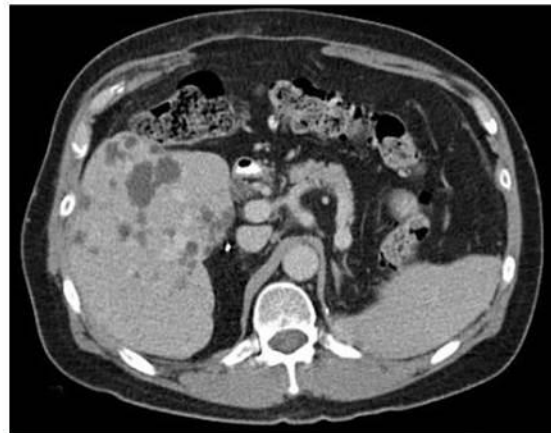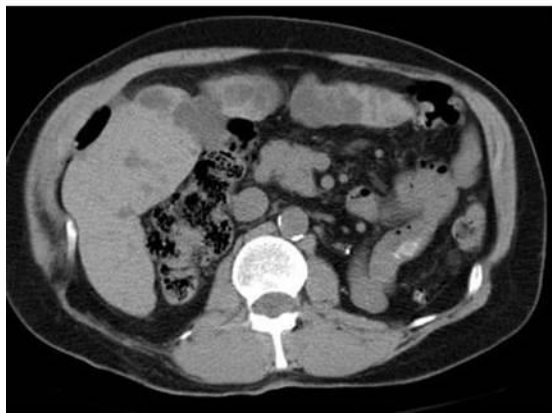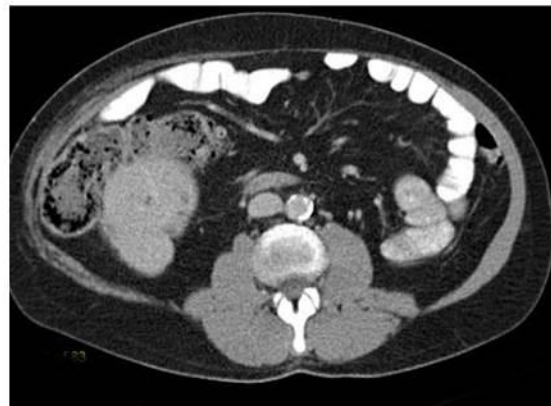



December-2003

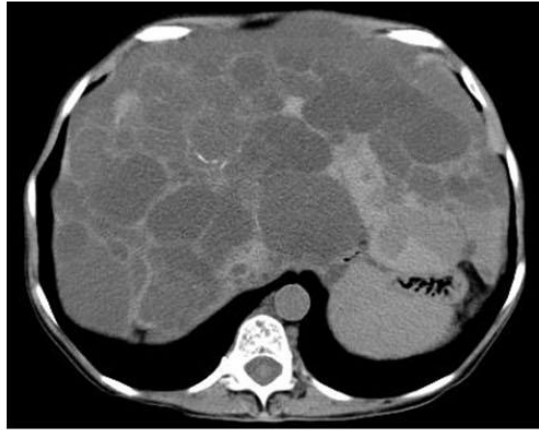

April-2004

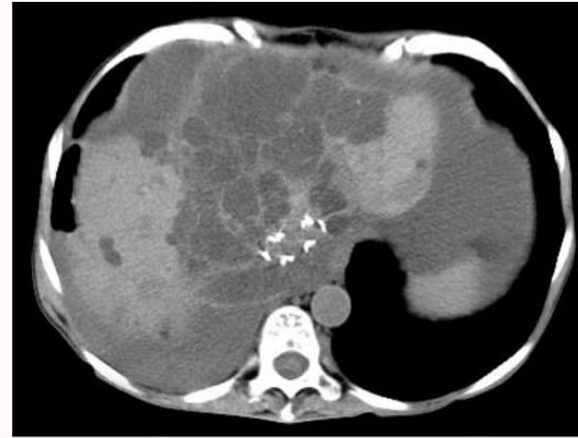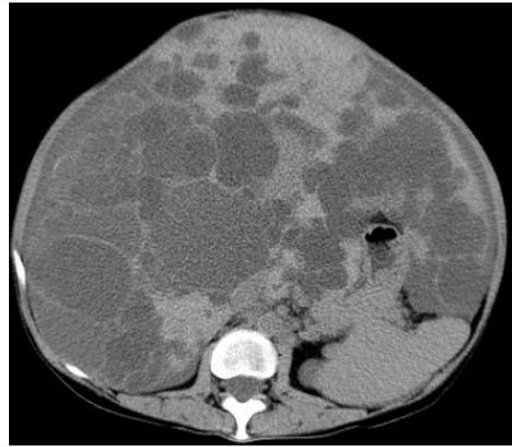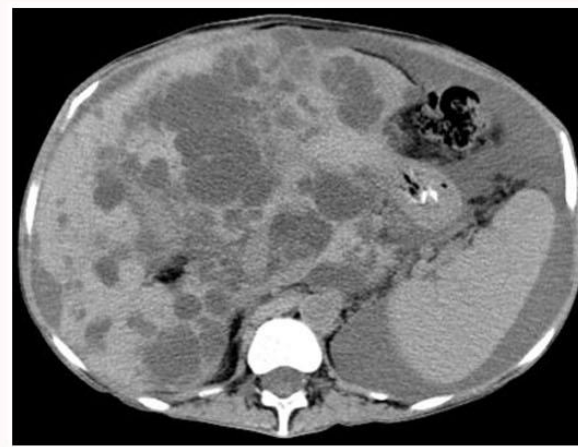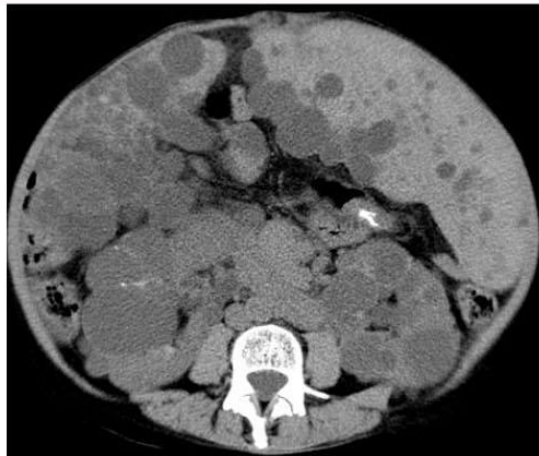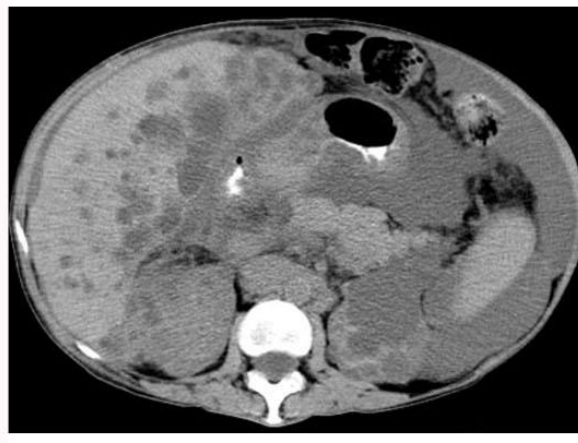

**July-1999**

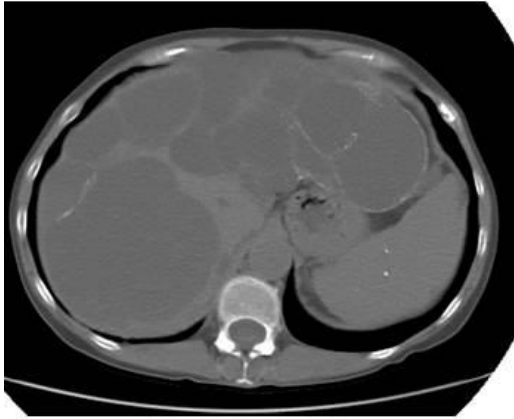

**August-1999**

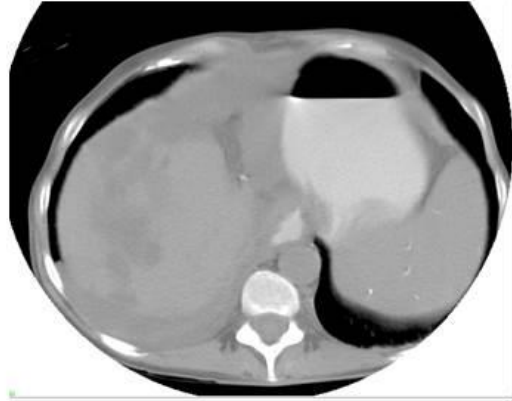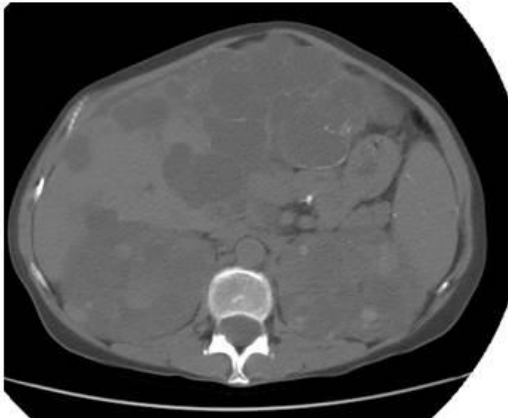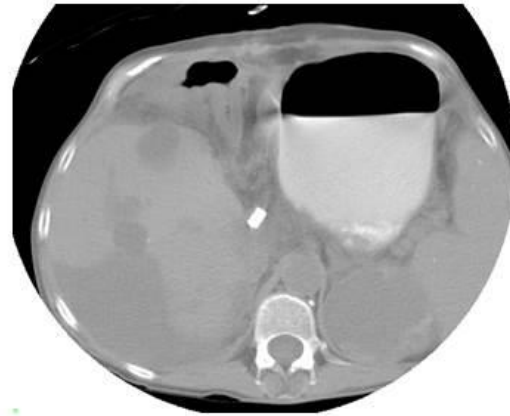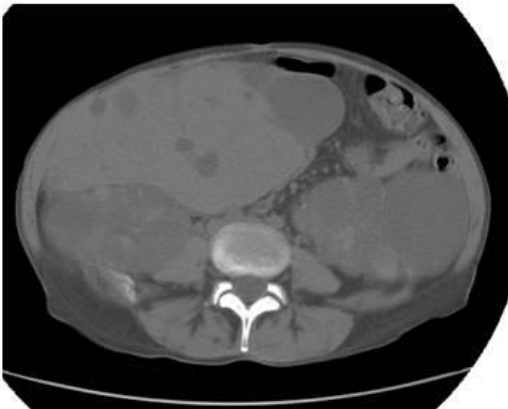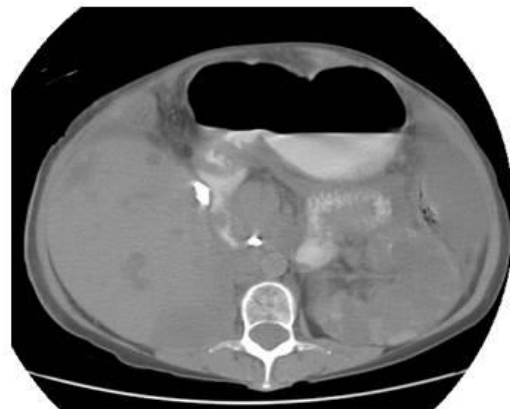

April-2003

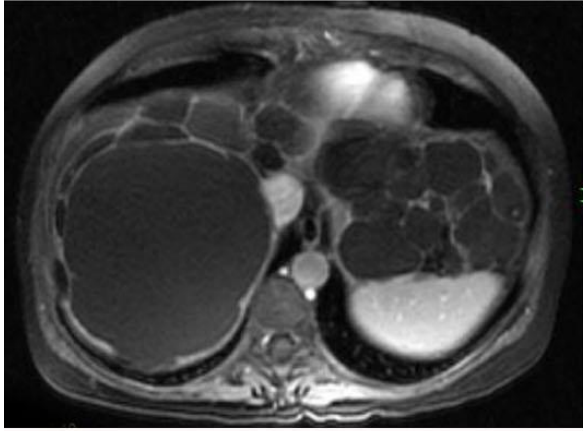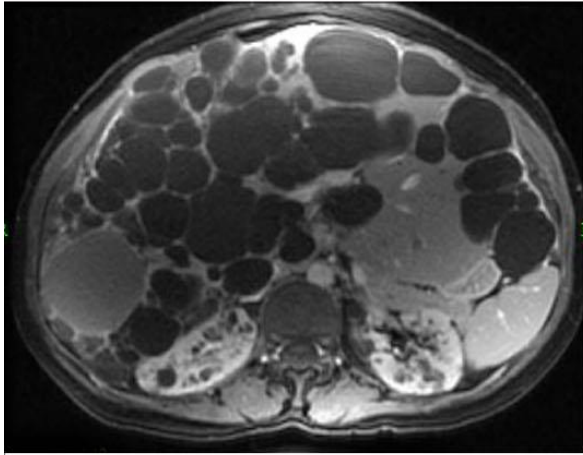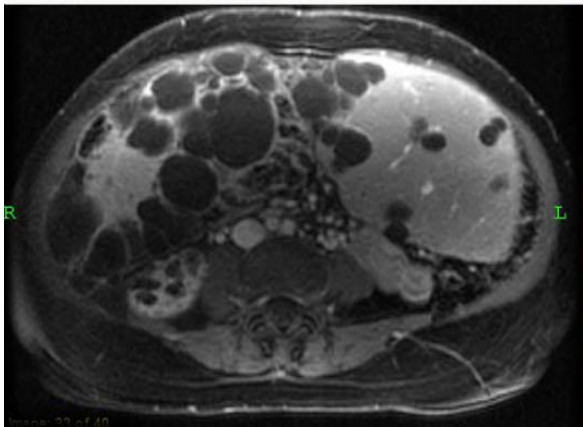

May-2003

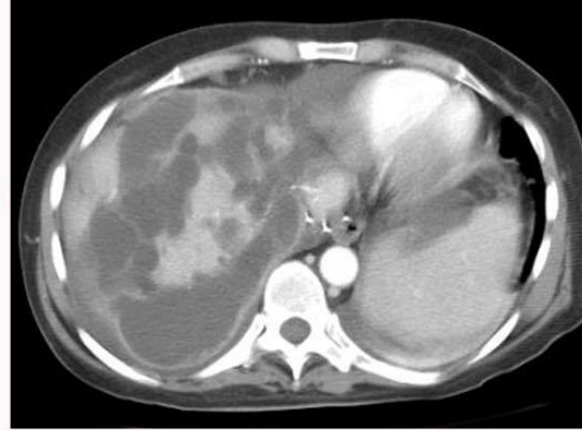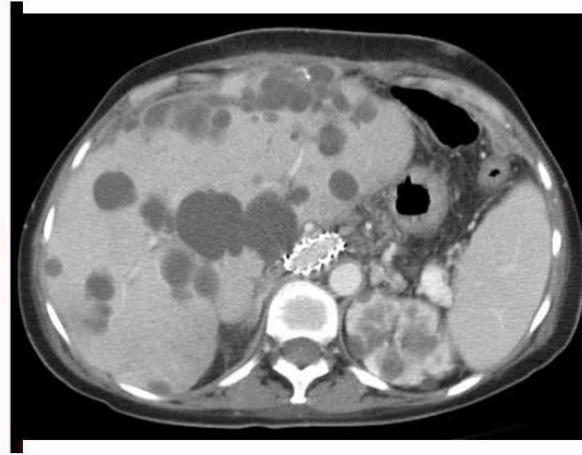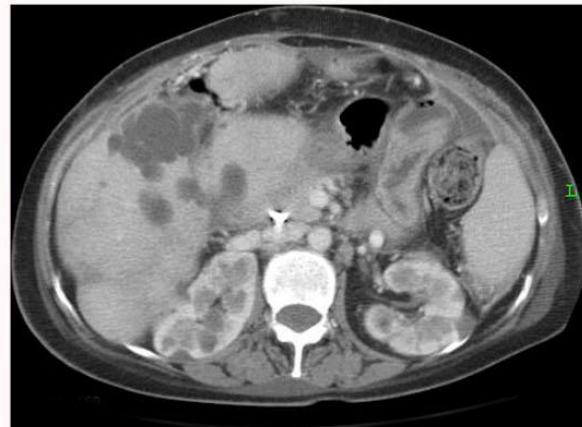

March-2003

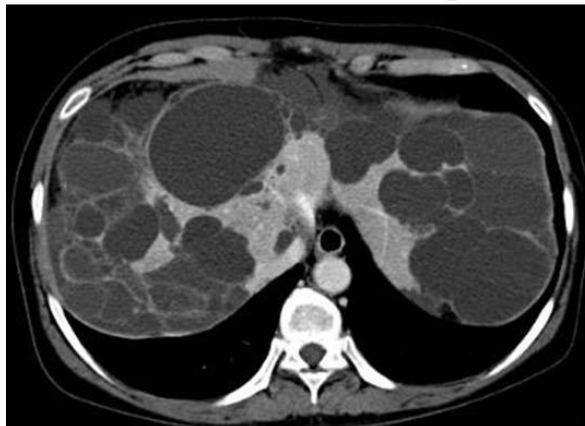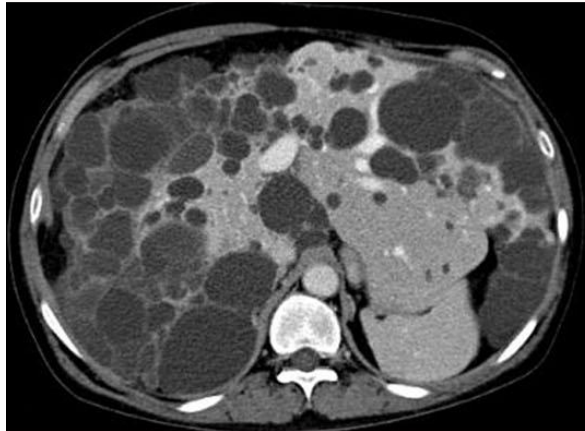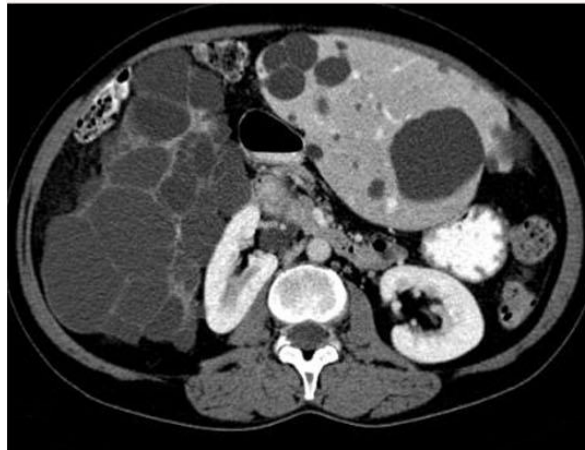

March-2003

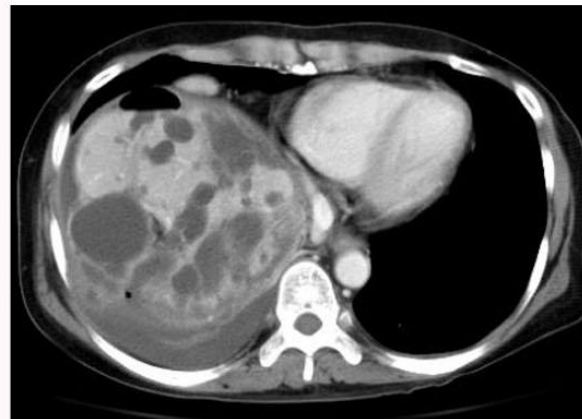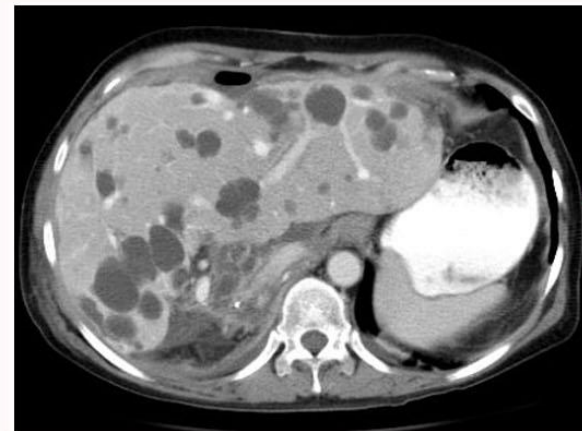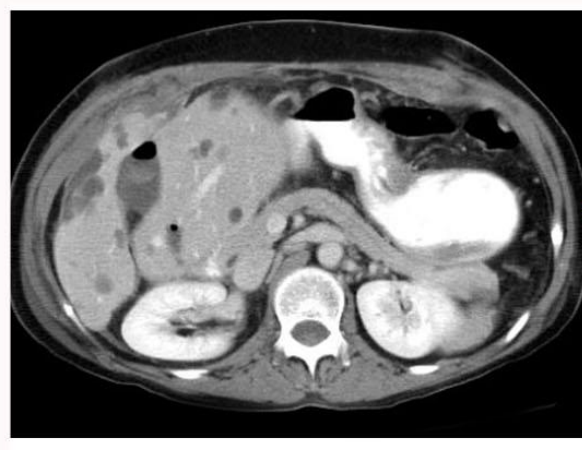

October-2002

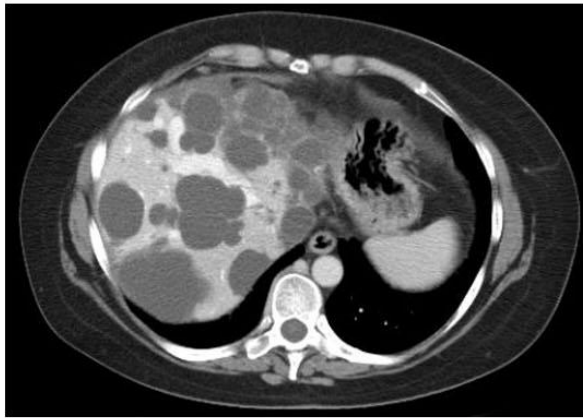

April-2003

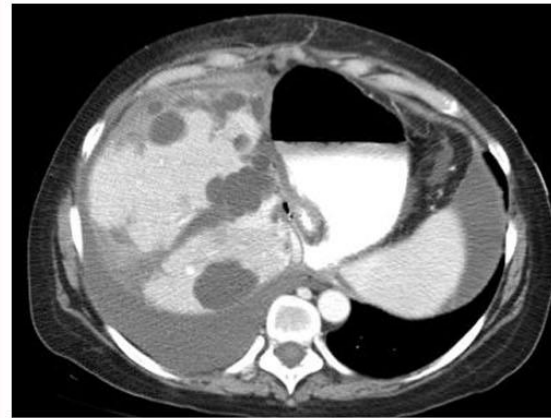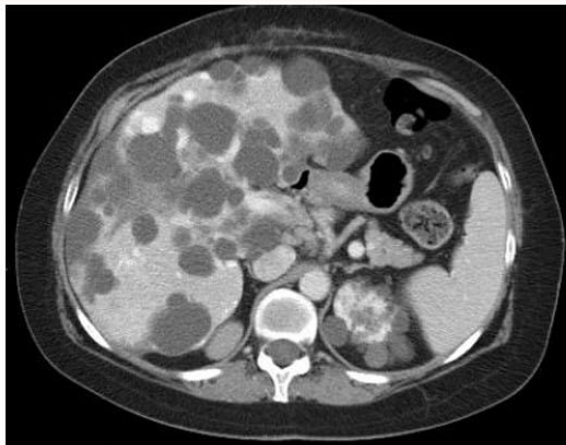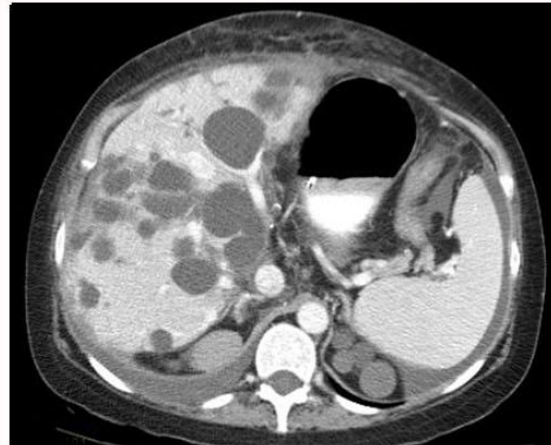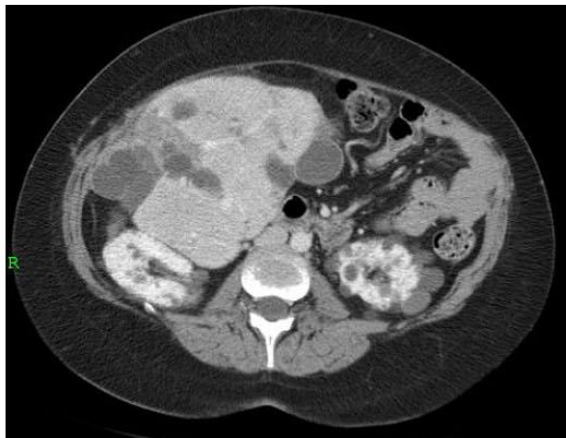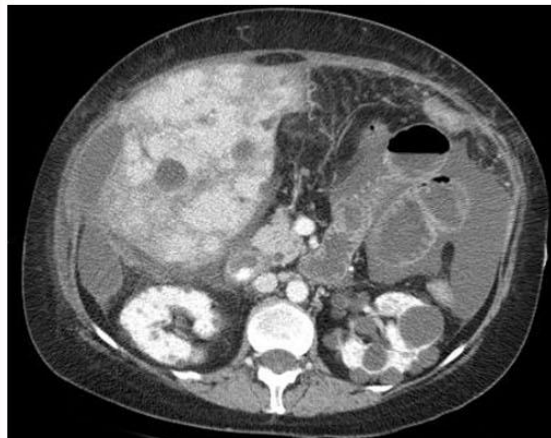

June-2002

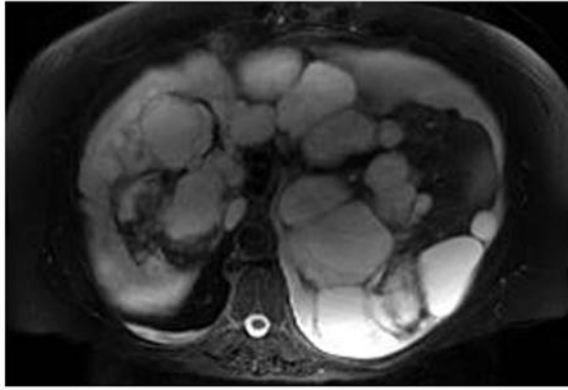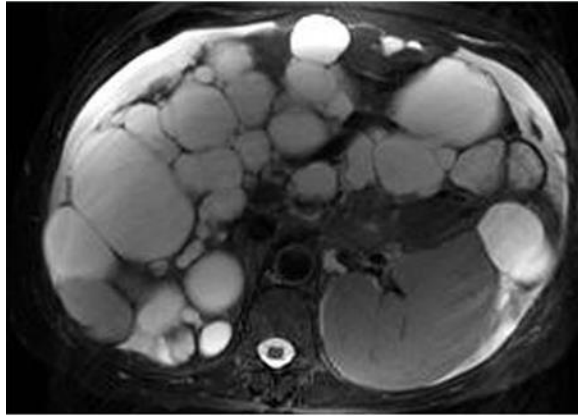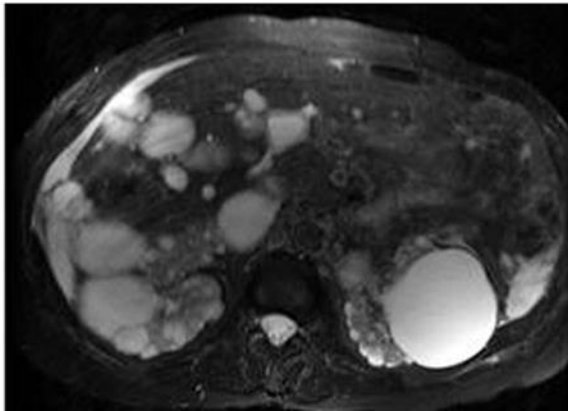

August-2002

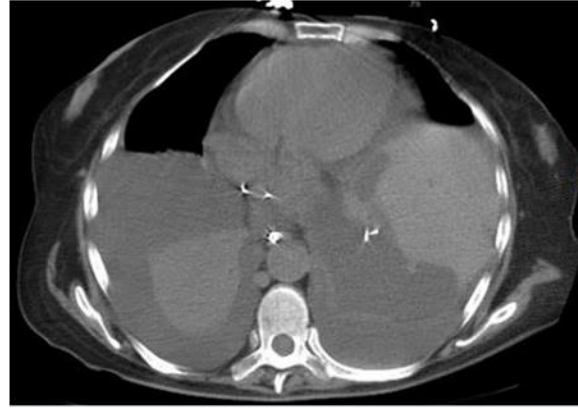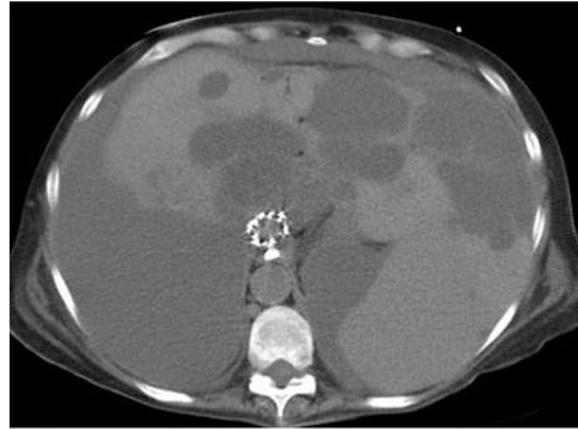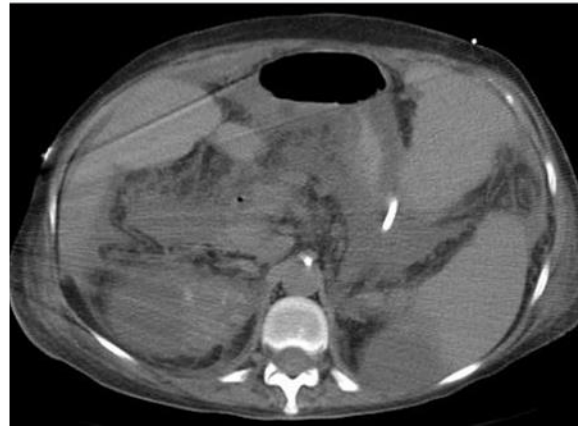

April-2001

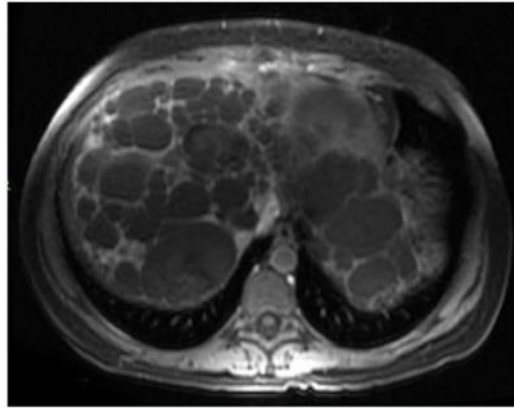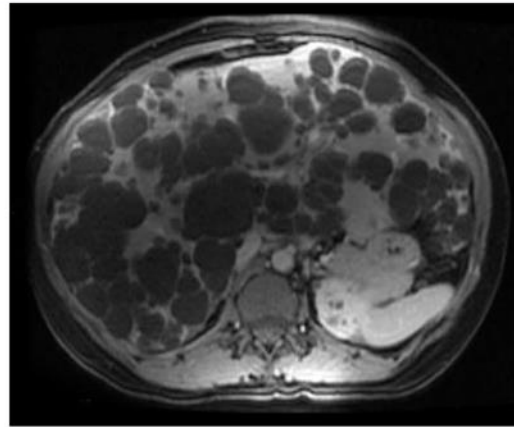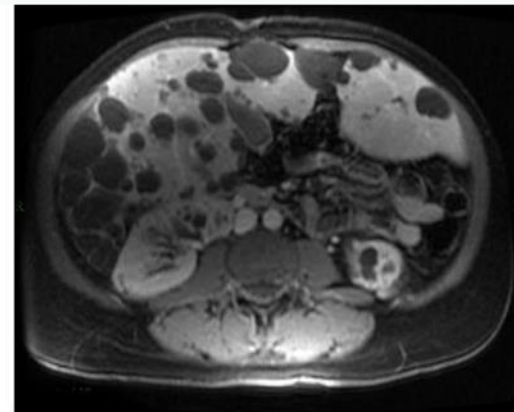

November-2010

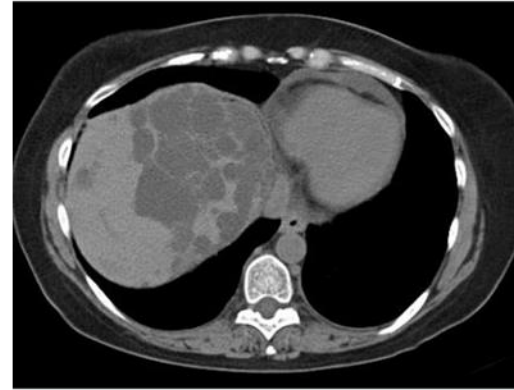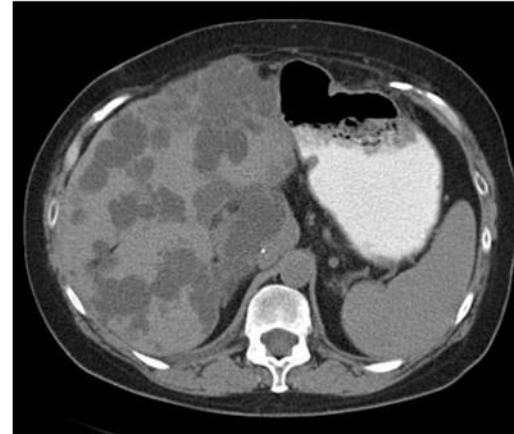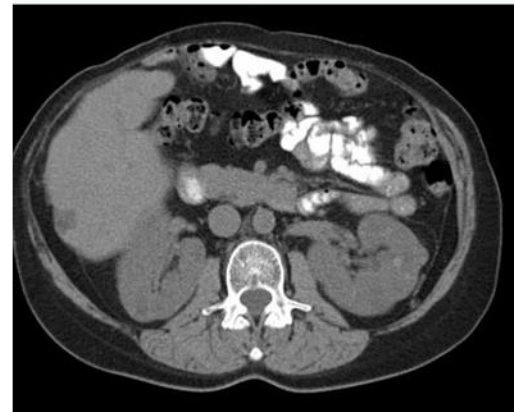

April-2000

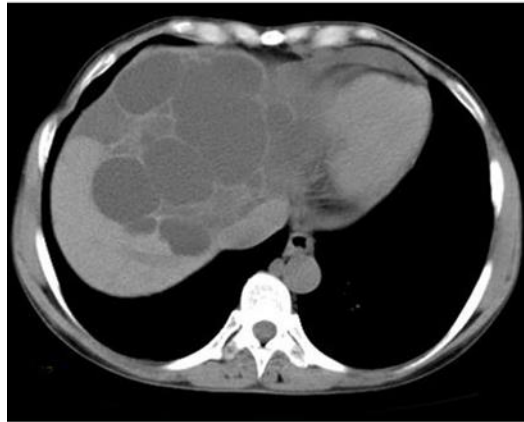

July-2009

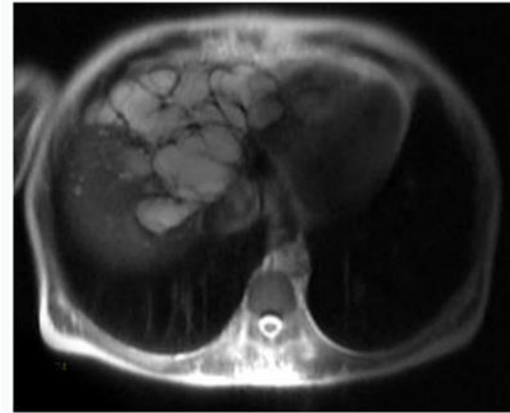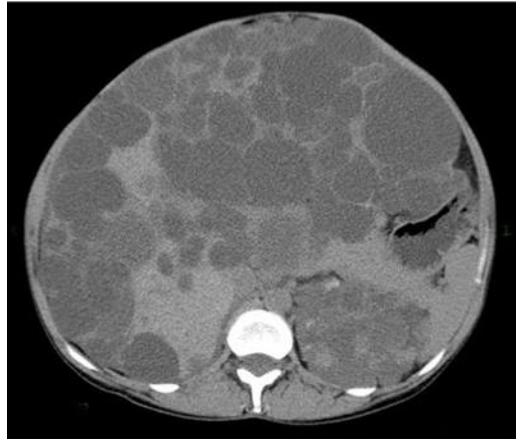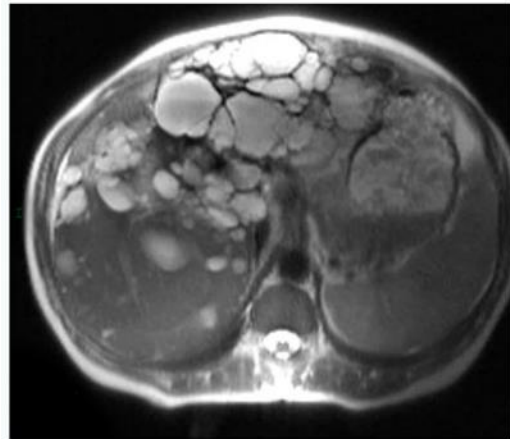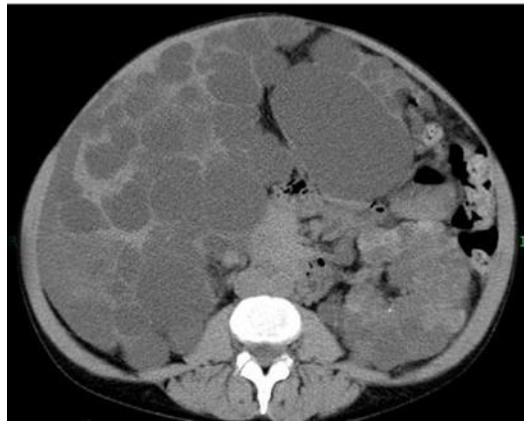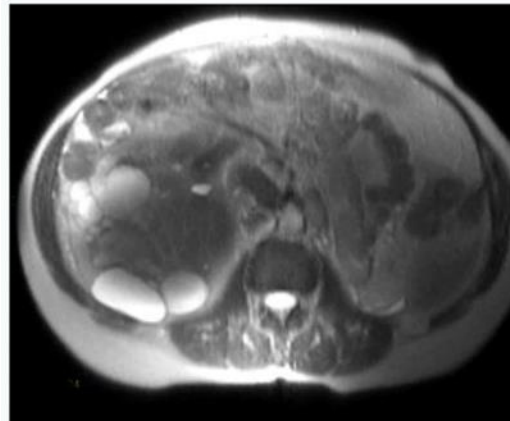



April-1992

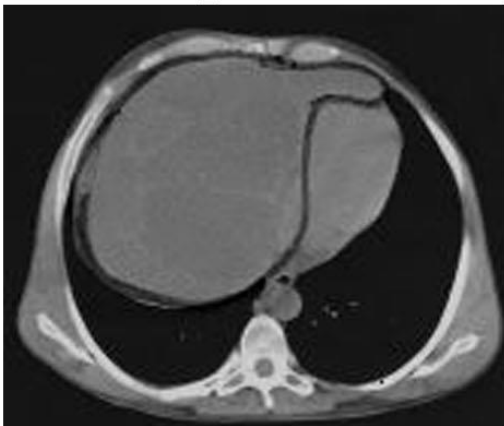

June-1999

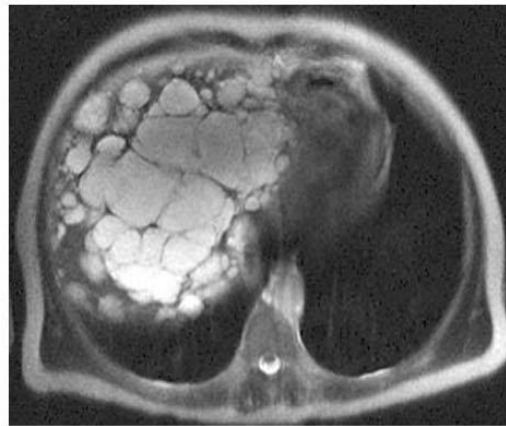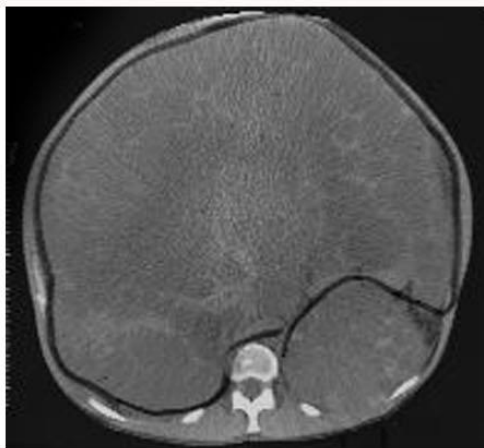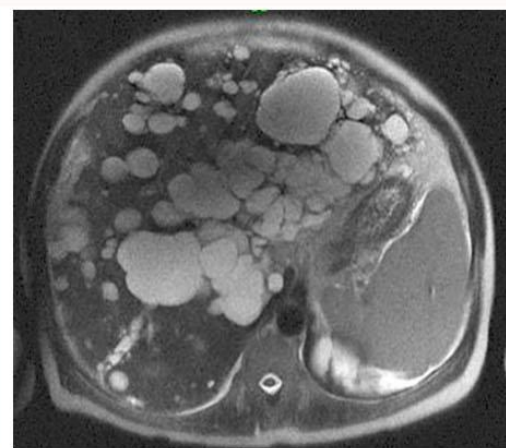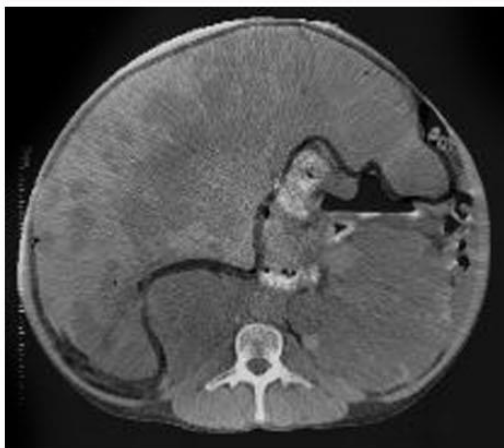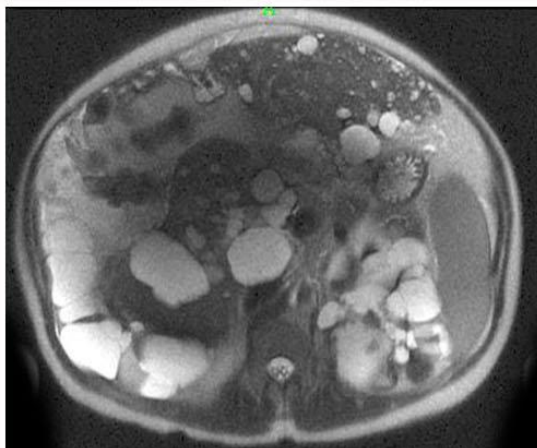

**November-2000**

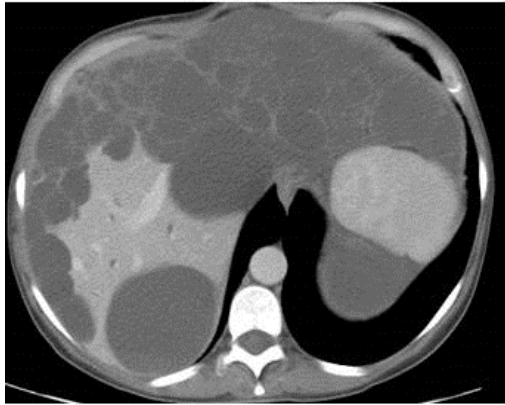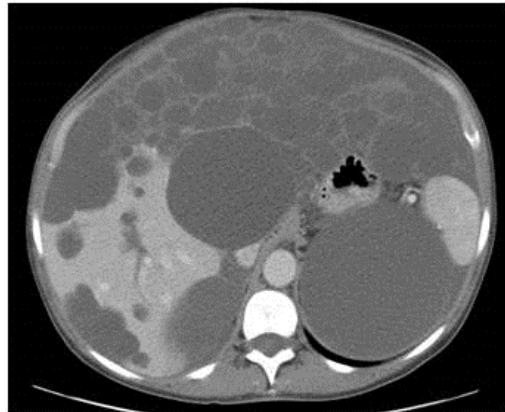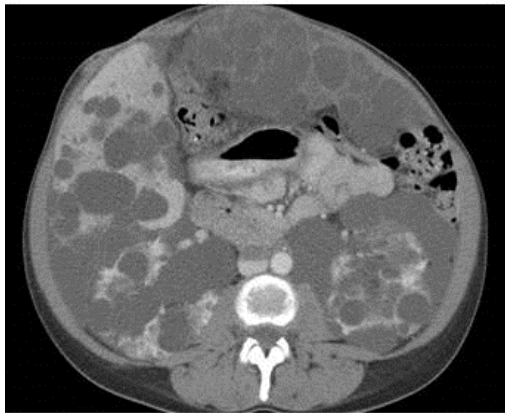

**July-2014**

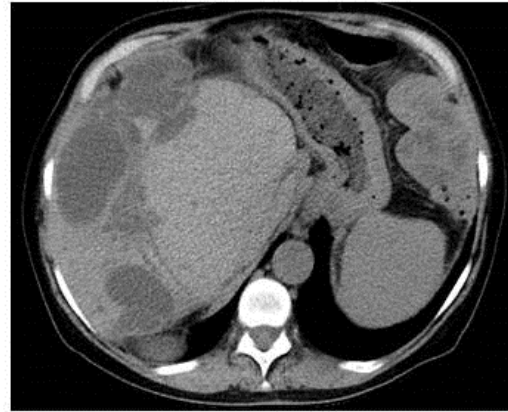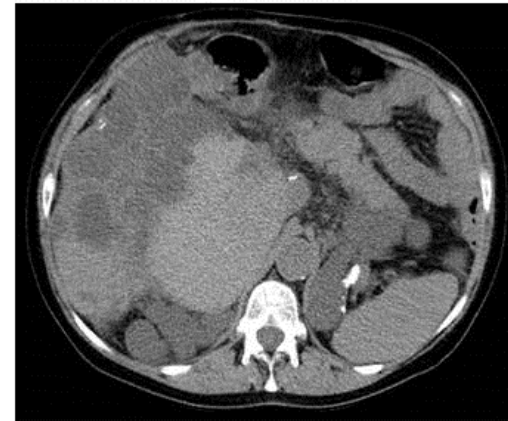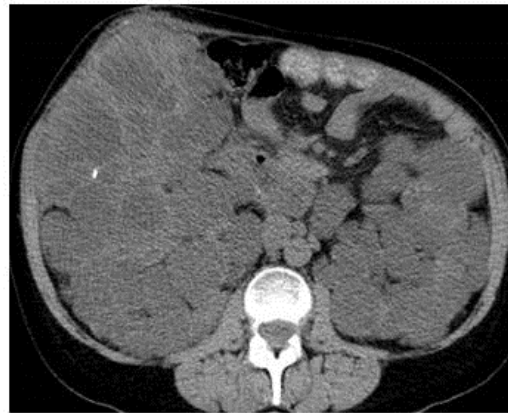

June-1992

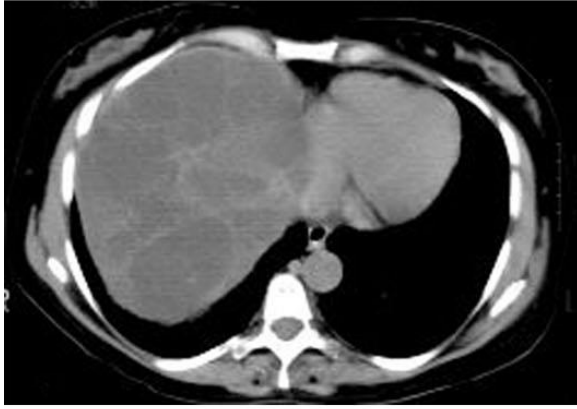

October-1999

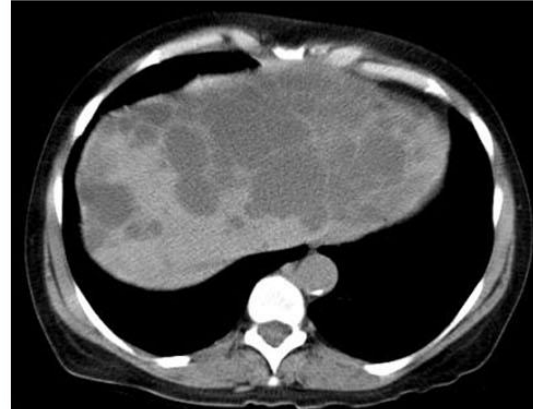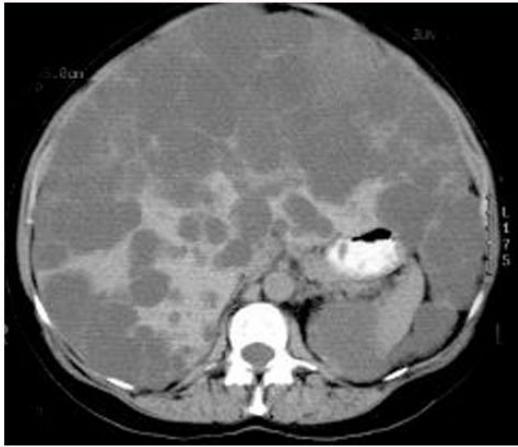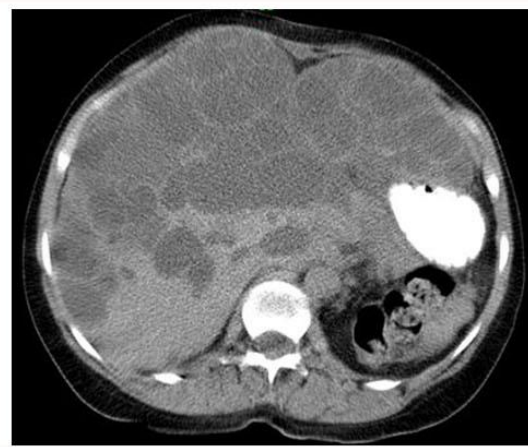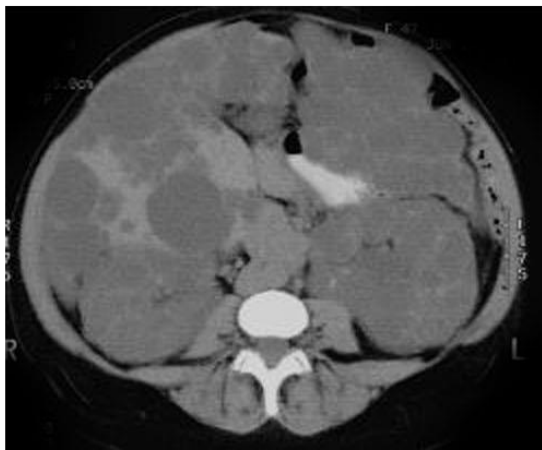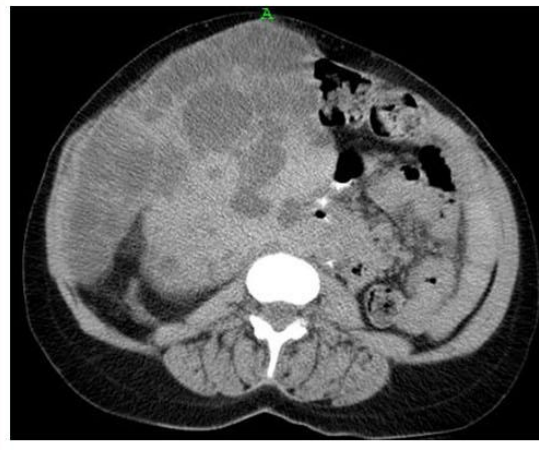

August-2000

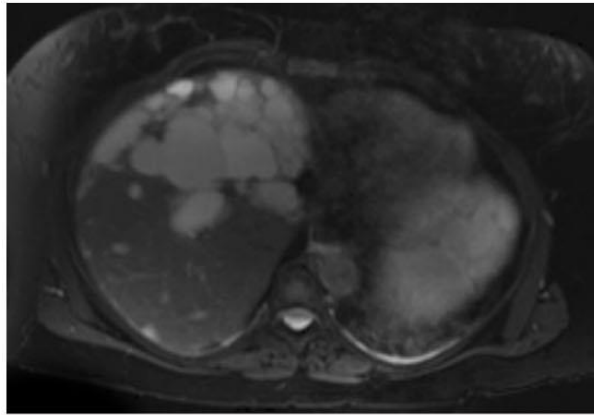

March-2007

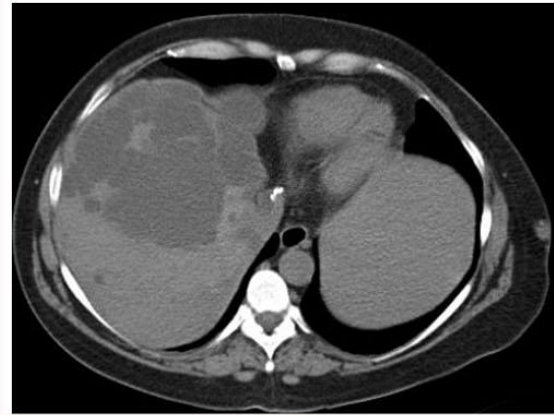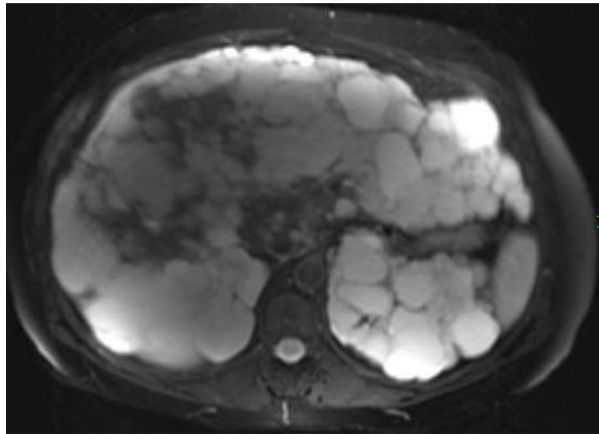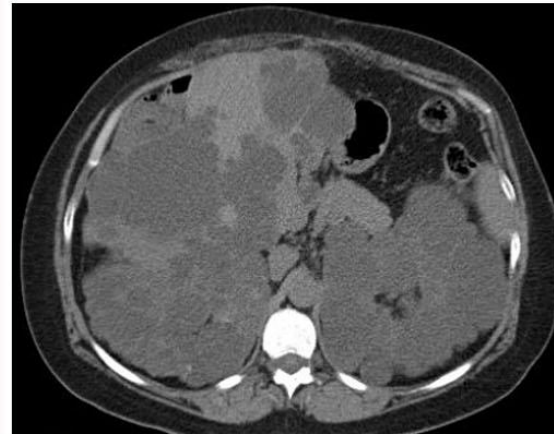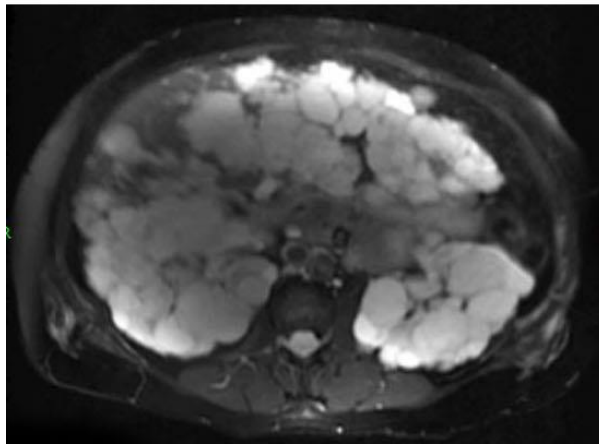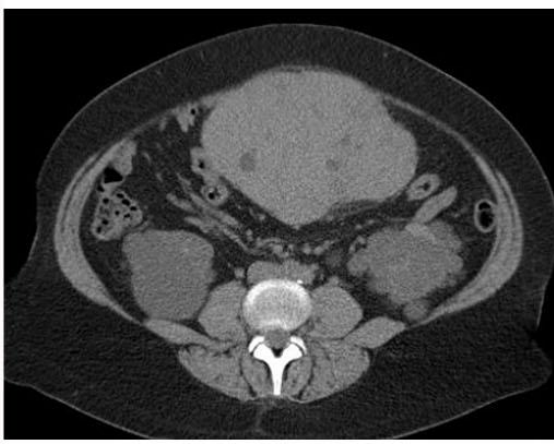

March-1999

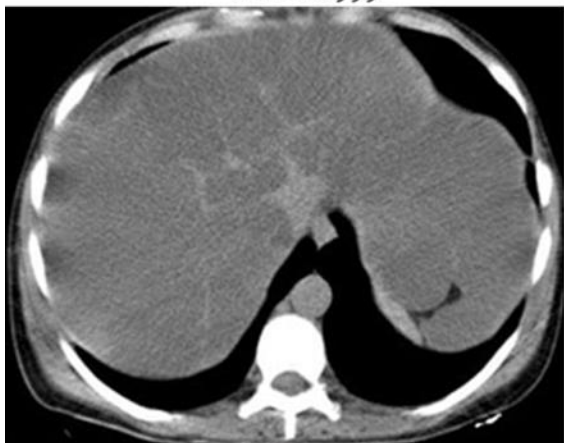

May-2008

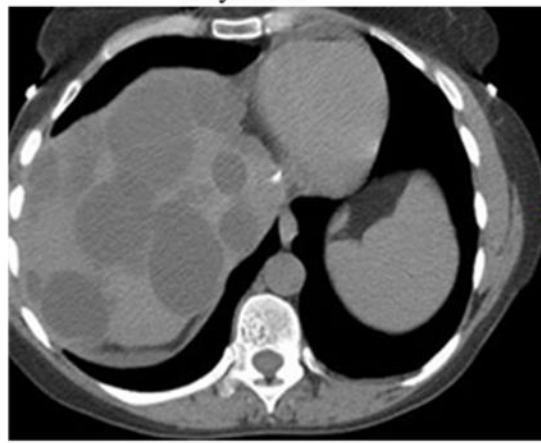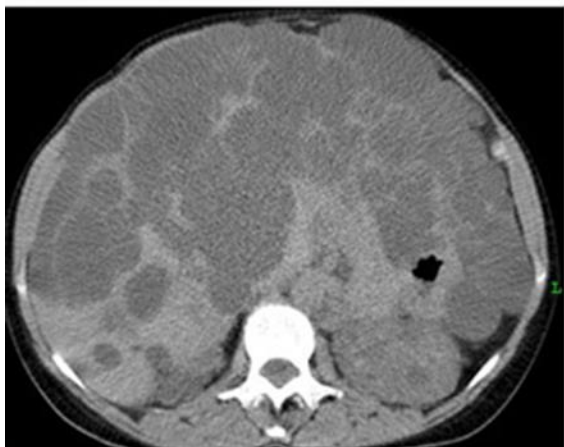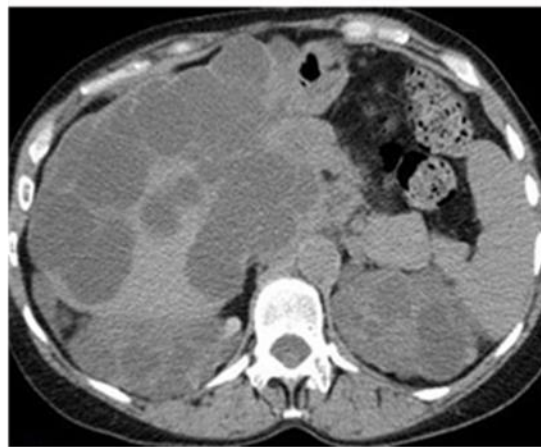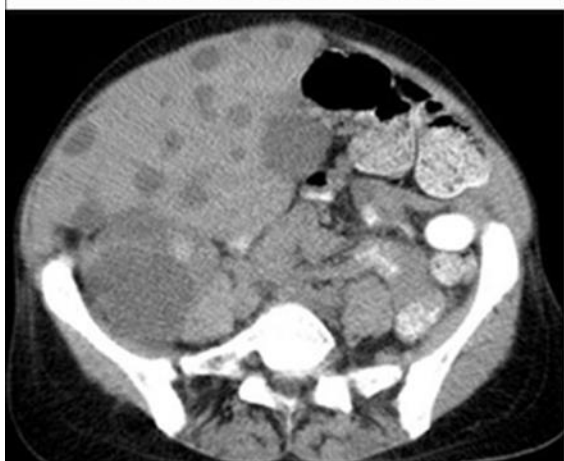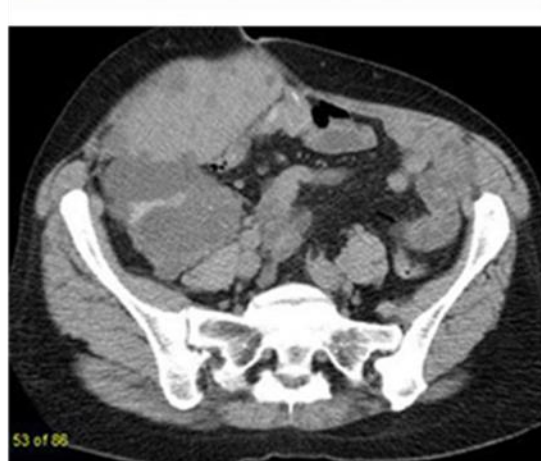

March-1998

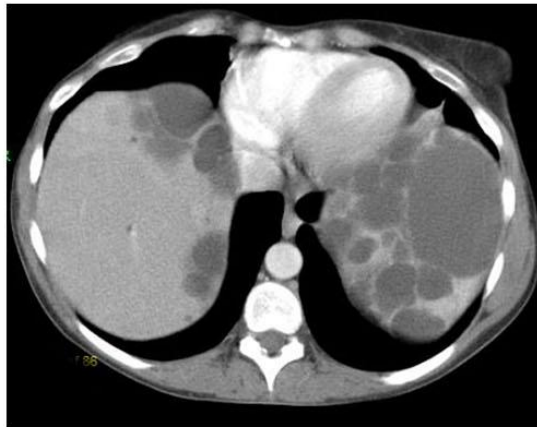

August-1999

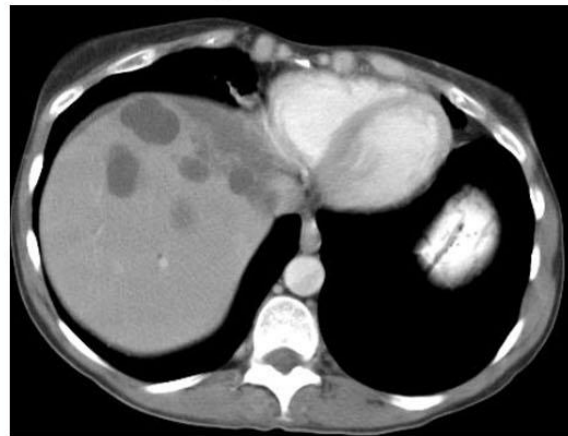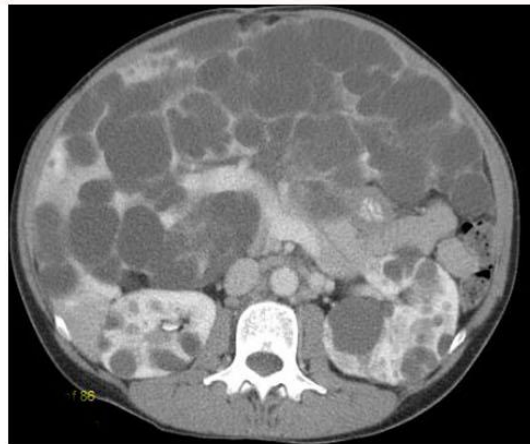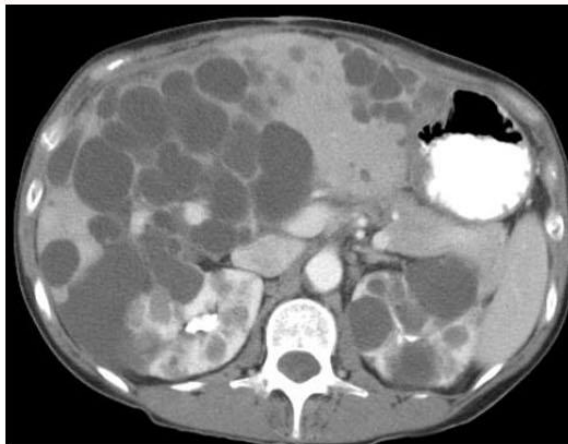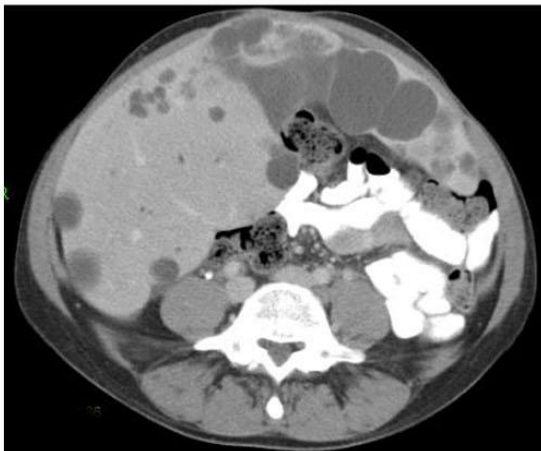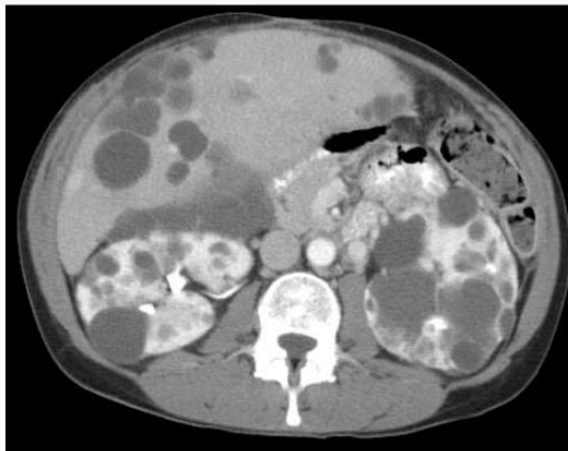

August-1992

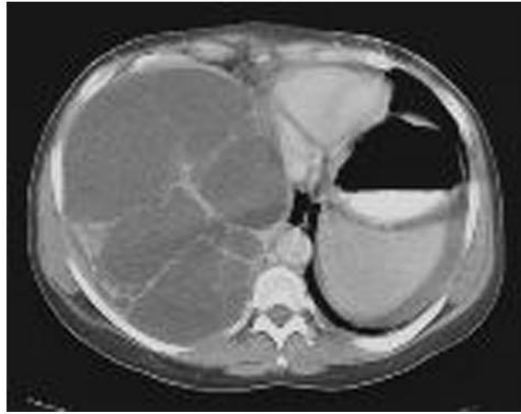

July-1994

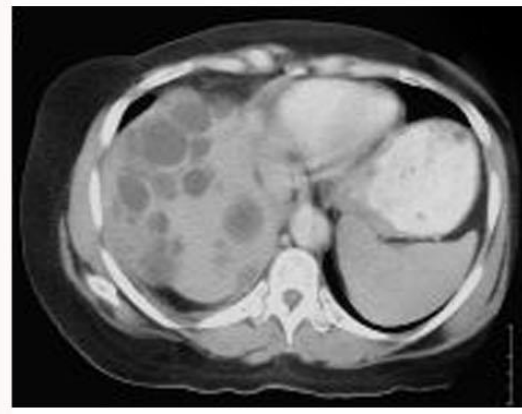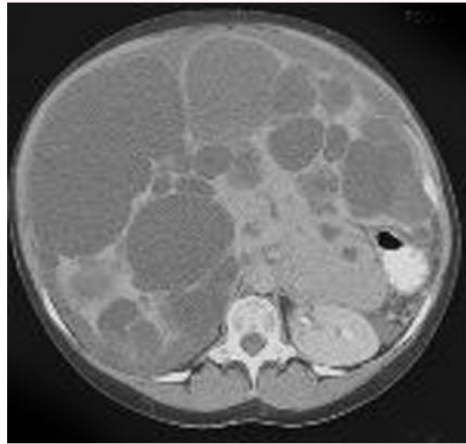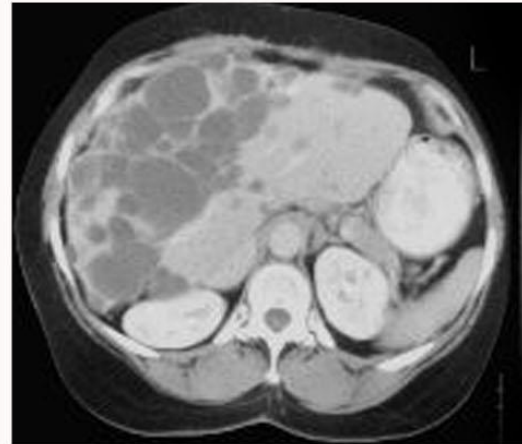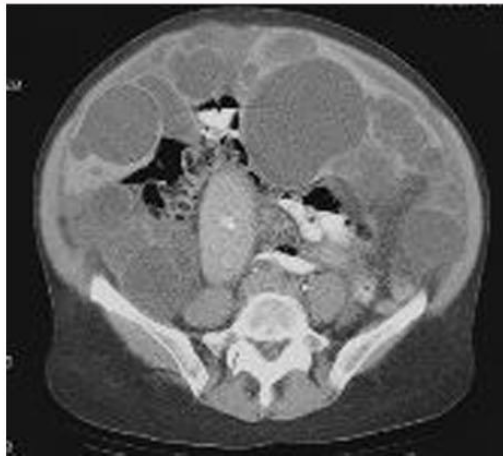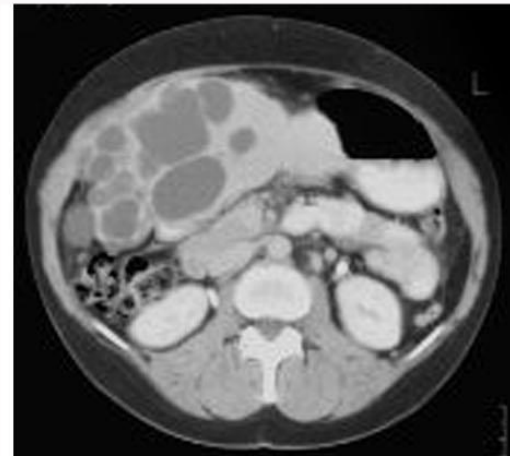

November-1994

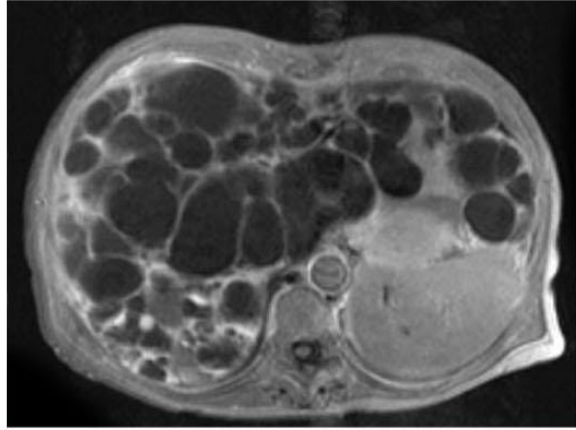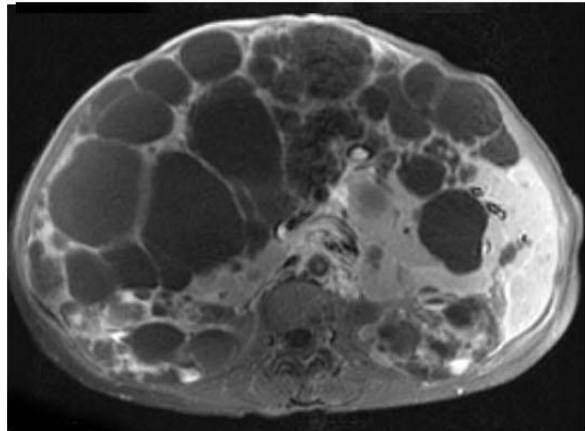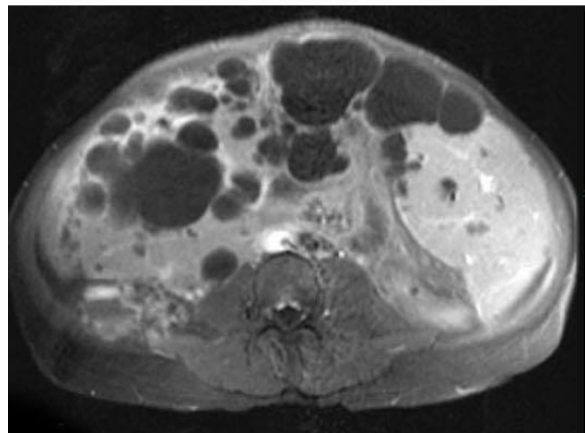

January-1999

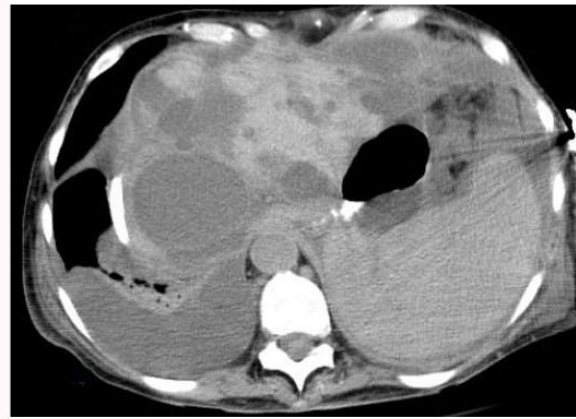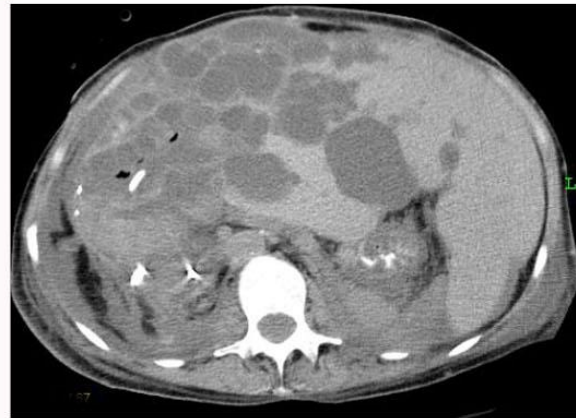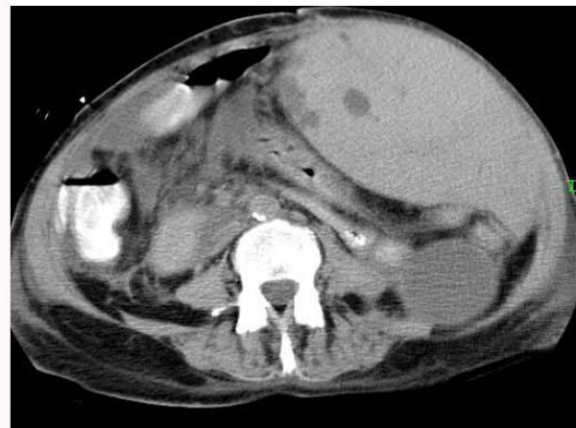

Supplement: NIHMS778630-supplement-SAppendix.pdf [file NIHMS778630-supplement-SAppendix.pdf]
