# Supplementary material
Source: PubMed Central journal article supplement (PMC4967356)
Supplement: NIHMS778630-supplement-01.pdf [file NIHMS778630-supplement-01.pdf]

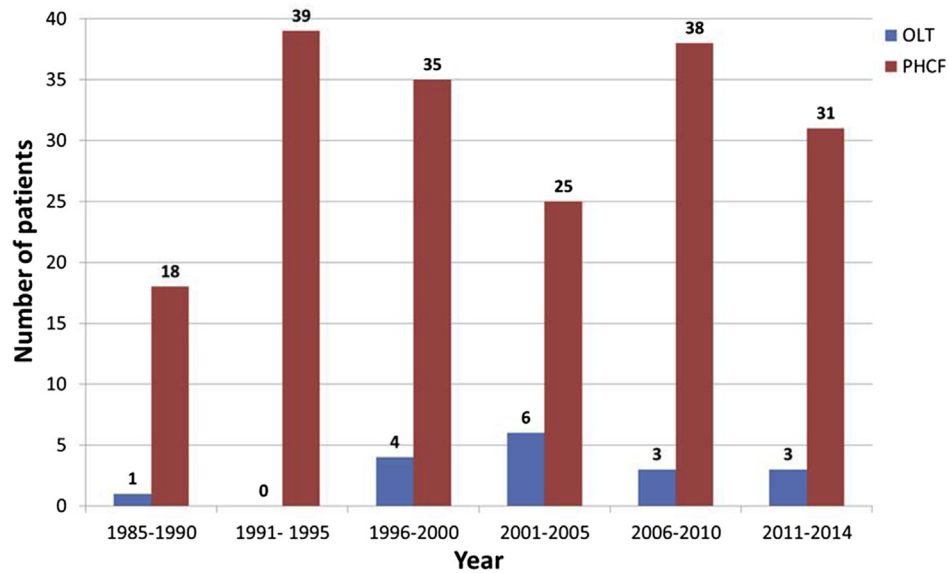

**Supplementary Figure 1.** Number of patients with polycystic liver disease (PLD) who received orthotopic liver transplantation (OLT) or partial hepatectomy with cyst fenestration (PHCF) for treatment of severe symptomatic PLD in our center.

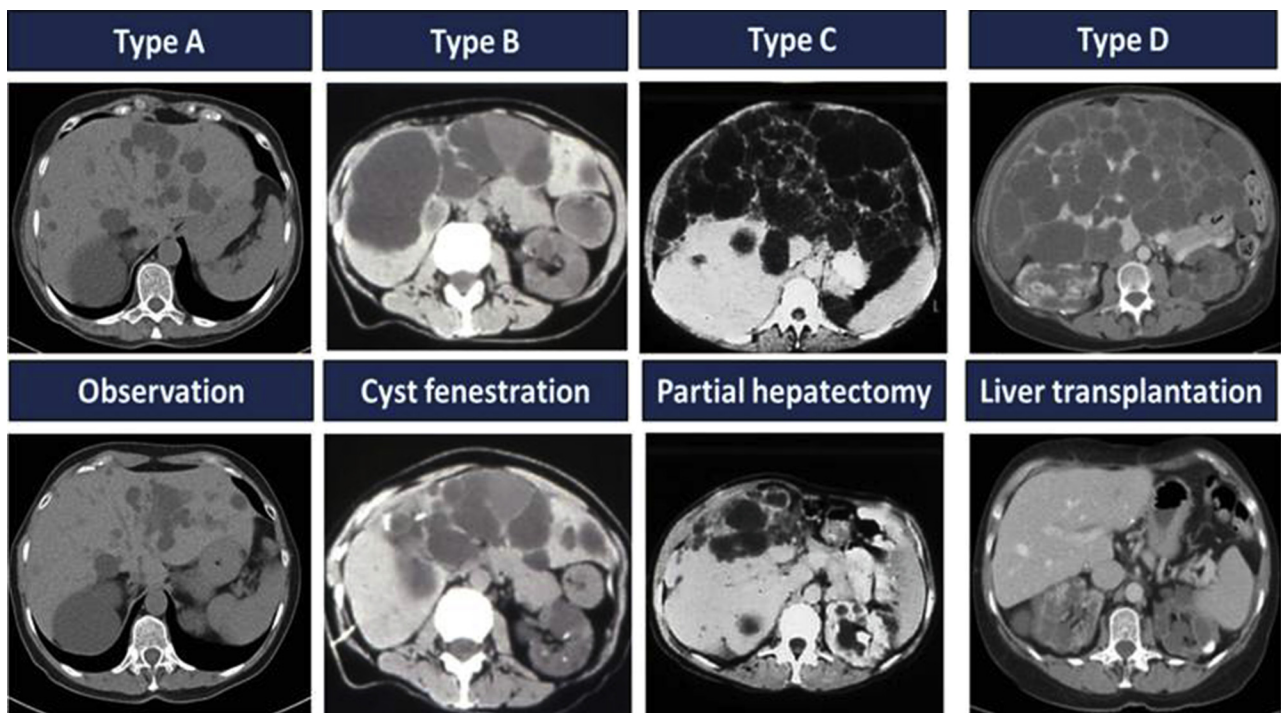

**Supplementary Figure 2.** Mayo classification for polycystic liver disease severity guiding treatment strategy. Type A patients have mild symptoms, type B have moderate to severe symptoms but limited numbers of large cysts, type C have severe symptoms with  $\geq 1$  sector of relatively preserved liver parenchyma, and type D have severe symptoms with  $< 1$  sector of preserved liver parenchyma.
